# Supplementary material for: Microwave-assisted simultaneous O,N-sulfonation in the synthesis of heparin-like oligosaccharides
Source: Royal Society of Chemistry journal article supplement (doi:10.1039/c5qo00320b), 2015-11-27

## Supporting Information

### Microwave-assisted Simultaneous *O,N*-Sulfonation for the Synthesis of Heparin-like Oligosaccharides

Peng Xu,<sup>†</sup> Stephane Laval,<sup>†</sup> Zheng Guo,<sup>‡</sup> and Biao Yu<sup>†\*</sup>

<sup>†</sup>*State Key Laboratory of Bio-organic and Natural Products Chemistry, Shanghai Institute of Organic Chemistry, Chinese Academy of Sciences, 345 Lingling Road, Shanghai 200032, China. [byu@mail.sioc.ac.cn](mailto:byu@mail.sioc.ac.cn).* <sup>‡</sup>*School of Physical Science and Technology, ShanghaiTech University, 100 Haike Road, Shanghai 201210, China.*

**General experimental procedures.** All reactions were carried out under nitrogen or argon with anhydrous solvents in flame-dried glassware, unless otherwise noted. All glycosylation reactions were performed in the presence of 4Å or 5Å molecular sieves, which were flame-dried immediately before use in the reaction under high vacuum. Glycosylation solvents were dried using a solvent purification system and used directly without further drying. The chemicals used were reagent grade as supplied, except where noted. Analytical thin-layer chromatography was performed using silica gel 60 F254 glass plates. Compound spots were visualized by UV light (254 nm) or by heating with a solution with 10% H<sub>2</sub>SO<sub>4</sub> in ethanol. Flash column chromatography was performed on silica gel H. NMR spectra were referenced using Me<sub>4</sub>Si (0 ppm), residual CHCl<sub>3</sub> (<sup>1</sup>H NMR  $\delta$  = 7.26 ppm, <sup>13</sup>C NMR  $\delta$  = 77.16 ppm), CD<sub>3</sub>OD (<sup>1</sup>H NMR  $\delta$  = 3.31 ppm, <sup>13</sup>C NMR  $\delta$  = 49.00 ppm), D<sub>2</sub>O (<sup>1</sup>H NMR  $\delta$  = 4.79 ppm). Peak and coupling constant assignments are based on <sup>1</sup>H NMR, <sup>1</sup>H–<sup>1</sup>H COSY, and <sup>1</sup>H–<sup>13</sup>C HMQC experiments. All optical rotations were measured at room temperature using the sodium D line. Splitting patterns are indicated as s (singlet), d (doublet), t (triplet), q (quartet), and brs (broad singlet) for <sup>1</sup>H NMR data. ESI-MS and MALDI-MS were run on an IonSpec Ultra instrument using HP5989A or VG Quattro MS. Optical rotations were measured using a Perkin-Elmer 241 polarimeter. Microwave-based sulfonation reactions were performed using a CEM Initiator synthesizer in sealed reaction vessels.

**Methyl (methyl 3,4-*O*-benzyl-2-*O*-benzoyl- $\beta$ -D-glucopyranosyluronate)-(1 $\rightarrow$ 4)-2-amino-3-*O*-benzyl-2-deoxy- $\alpha$ -D-glucopyranosyl-(1 $\rightarrow$ 4)-(methyl 3-*O*-benzyl-2-*O*-benzoyl- $\beta$ -D-glucopyranosyluronate)-(1 $\rightarrow$ 4)-2-amino-3-*O*-benzyl-2-deoxy- $\alpha$ -D-glucopyranoside (2)**

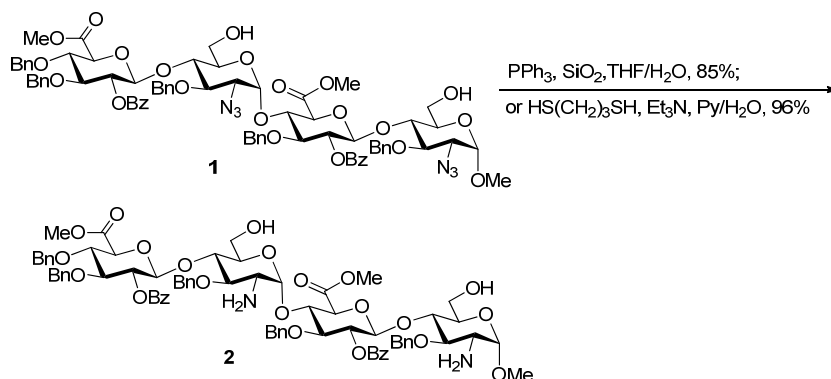

Tetrasaccharide **1** (44 mg, 0.030 mmol) was dissolved in THF (1 mL) containing H<sub>2</sub>O (0.1 mL). Silica gel (88 mg) and PPh<sub>3</sub> (40 mg, 0.15 mmol) were added at room temperature. Stirring was continued until TLC indicated disappearance of the raw material (~ 1 d). The mixture was filtered, and the filtrate was concentrated in vacuum. The residue was purified by Sephadex LH-20 chromatography column (CH<sub>2</sub>Cl<sub>2</sub>/MeOH, 1/1) to give **2** (36 mg, 85%) as a white solid.

*An alternative method.* Tetrasaccharide **1** (125 mg, 0.085 mmol) was dissolved in pyridine (3 mL) and H<sub>2</sub>O (0.75 mL), protected from light and stirred with propane-1,3-dithiol (0.68 mL) and trimethylamine (0.34 mL) overnight. The mixture was concentrated in vacuum, and then co-evaporated with toluene and ethanol (4 mL, 5/1 v/v) for three times. The residue was purified by silica gel column chromatography (CH<sub>2</sub>Cl<sub>2</sub>/MeOH, 20:1 + 1% Et<sub>3</sub>N) to give **2** (114 mg, 96%) as a white solid:  $[\alpha]_D^{25} = 67.4$  (*c* 1.7, CHCl<sub>3</sub>); <sup>1</sup>H NMR (500 MHz, CDCl<sub>3</sub>)  $\delta$  8.05 (d, *J* = 7.4 Hz, 2H), 8.01 (d, *J* = 7.4 Hz, 2H), 7.62–7.00 (m, 31H), 5.38–5.28 (m, 3H), 5.20 (d, *J* = 11.2 Hz, 1H), 5.08 (d, *J* = 11.4 Hz, 1H), 4.94–4.69 (m, 4H), 4.62 (dd, *J* = 11.0, 8.5 Hz, 2H), 4.53 (t, *J* = 10.6 Hz, 2H), 4.46 (d, *J* = 11.4 Hz, 1H), 4.14 (t, *J* = 8.6 Hz, 1H), 4.01 (d, *J* = 6.1 Hz, 2H), 3.90 (d, *J* = 8.9 Hz, 1H), 3.88–3.74 (m, 3H), 3.74–3.50 (m, 6H), 3.33 (ddd, *J* = 18.9, 16.0, 9.5 Hz, 3H), 3.17 (s, 2H), 3.13 (d, *J* = 10.0 Hz, 1H), 3.00 (s, 3H), 2.66–2.57 (m, 2H); <sup>13</sup>C NMR (125 MHz, CDCl<sub>3</sub>)  $\delta$  169.77, 168.26,

166.01, 165.57, 164.87, 138.22, 138.09, 137.83, 137.75, 137.35, 133.44, 133.31, 132.91, 130.15, 129.98, 129.90, 129.85, 129.68, 129.33, 129.27, 128.64, 128.57, 128.52, 128.45, 128.42, 128.31, 128.30, 128.23, 128.11, 128.02, 127.98, 127.79, 127.71, 127.68, 127.34, 102.06, 101.46, 98.56, 98.06, 81.10, 79.49, 79.45, 78.26, 78.17, 77.41, 77.16, 76.91, 75.73, 75.54, 75.39, 75.27, 74.70, 74.61, 74.57, 73.52, 73.21, 73.15, 72.89, 70.86, 70.66, 68.89, 66.72, 63.17, 62.64, 62.50, 55.53, 52.88, 51.77; ESI-MS  $m/z$  calcd for  $C_{76}H_{84}N_2O_{23}Na$   $[M+Na]^+$  1415.5357, found 1415.5371.

**Methyl (methyl 3,4-di-*O*-benzyl-2-*O*-benzoyl- $\beta$ -D-glucopyranosyluronate)-(1 $\rightarrow$ 4)-2-*N*-sulfo-3-*O*-benzyl-2-deoxy- $\alpha$ -D-glucopyranosyl-(1 $\rightarrow$ 4)-(methyl 3-*O*-benzyl-2-*O*-benzoyl- $\beta$ -D-glucopyranosyluronate)-(1 $\rightarrow$ 4)-2-*N*-sulfo-3-*O*-benzyl-2-deoxy- $\alpha$ -D-glucopyranoside (4)**

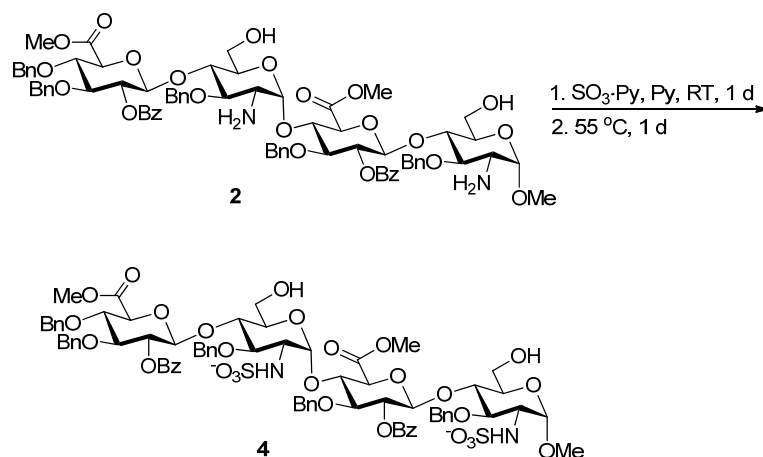

$SO_3 \cdot Py$  (23 mg, 0.145 mmol) was added to a solution of tetrasaccharide **2** (10 mg, 0.0073 mmol) in pyridine (1.0 mL). The mixture was protected from light, stirred for 24 h at room temperature and then heated for 24 h at 55 °C. MeOH (0.4 mL) was added to quench the reaction. The mixture was concentrated in vacuum, and successively purified by a small RP-18 silica gel column ( $H_2O/CH_3OH$ , 1/0 to 1/3). The fractions containing product were concentrated in vacuum, and the residue was immediately passed through a column of Dowex 50WX4  $Na^+$  resin using  $CH_3OH$  as eluent. The fractions containing product were concentrated in vacuum to provide **4** (7.4 mg, 66%) as a white solid:  $[\alpha]_D^{28} = 16.1$  ( $c$  0.3, MeOH);  $^1H$  NMR (400 MHz,  $CD_3OD$ )  $\delta$  8.24 (d,  $J = 7.4$  Hz, 2H), 8.15 (d,  $J = 7.5$  Hz, 2H), 7.72–7.01 (m, 31H), 5.37 (d,  $J = 3.4$  Hz, 1H), 5.32–5.18 (m, 6H), 4.83–4.69 (m, 4H), 4.69–4.54 (m, 4H),

4.53–4.37 (m, 3H), 4.32–3.84 (m, 10H), 3.81–3.63 (m, 2H), 3.60 (s, 3H), 3.51–3.40 (m, 2H), 3.27 (s, 3H), 3.21 (s, 3H), 3.17 (dd,  $J = 10.3, 3.4$  Hz, 1H), 3.03 (d,  $J = 10.2$  Hz, 1H); ESI-MS  $m/z$  calcd for  $C_{76}H_{82}N_2O_{29}S_2$   $[M-2H]^{2-}$  775.2, found 775.1.

### Methyl (methyl

**3,4-di-*O*-benzyl-2-*O*-benzoyl- $\beta$ -D-glucopyranosyluronate)-(1 $\rightarrow$ 4)-2-amino-3-*O*-benzyl-6-*O*-sulfo-2-deoxy- $\alpha$ -D-glucopyranosyl-(1 $\rightarrow$ 4)-(methyl 3-*O*-benzyl-2-*O*-benzoyl- $\beta$ -D-glucopyranosyluronate)-(1 $\rightarrow$ 4)-2-amino-3-*O*-benzyl-6-*O*-sulfo-2-deoxy- $\alpha$ -D-glucopyranoside (5)**

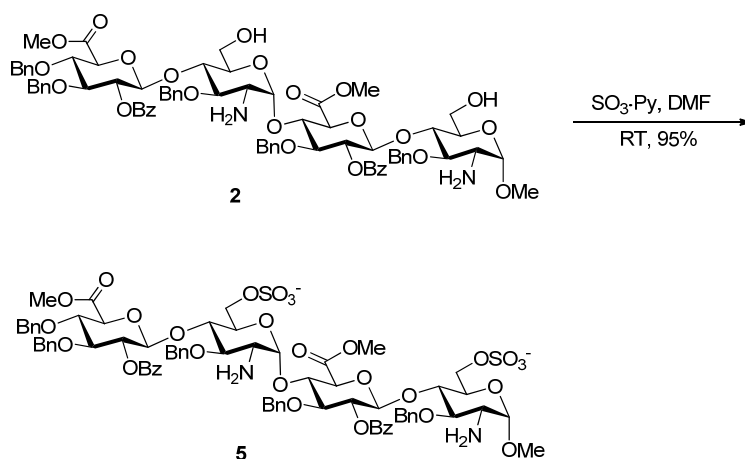

$\text{SO}_3\cdot\text{Py}$  (10.0 mg, 0.063 mmol) was added to a solution of tetrasaccharide **2** (4.4 mg, 0.00316 mmol) in DMF (0.8 mL). The mixture was stirred for 24 h at room temperature. MeOH (0.4 mL) was added to quench the reaction. The mixture was concentrated in vacuum, and successively purified by a small RP-18 silica gel column ( $\text{H}_2\text{O}/\text{CH}_3\text{OH}$ , 1/0 to 1/4). The fractions containing product were concentrated in vacuum, and the residue was immediately passed through a column of Dowex 50WX4  $\text{Na}^+$  resin using  $\text{CH}_3\text{OH}$  as eluent. The fractions containing product were concentrated in vacuum to provide tetrasaccharide **5** (4.7 mg, 95%):  $[\alpha]_D^{26} = 28.4$  ( $c$  0.4, MeOH);  $^1\text{H}$  NMR (400 MHz,  $\text{CD}_3\text{OD}$ )  $\delta$  8.26 (d,  $J = 7.5$  Hz, 2H), 8.17 (d,  $J = 7.5$  Hz, 2H), 7.80–6.95 (m, 31H), 5.33–5.09 (m, 7H), 4.76 (dd,  $J = 14.5, 6.6$  Hz, 3H), 4.68 (d,  $J = 3.4$  Hz, 1H), 4.65–4.52 (m, 4H), 4.51–4.34 (m, 3H), 4.24 (d,  $J = 9.7$  Hz, 1H), 4.21–3.98 (m, 5H), 3.97–3.84 (m, 4H), 3.67–3.53 (m, 4H), 3.52–3.37 (m, 4H), 3.25 (s, 3H), 3.23 (s, 3H), 2.91 (dd, 1H), 2.71 (d,  $J = 10.2$  Hz, 1H); ESI-MS  $m/z$  calcd for  $C_{76}H_{82}N_2O_{29}S_2$   $[M-2H]^{2-}$  775.2, found 775.5.

**4-Methoxyphenyl 2-azido-3,6-di-*O*-benzyl-2-deoxy- $\alpha$ -D-glucopyranosyl-(1 $\rightarrow$ 4)-  
(methyl 2-*O*-benzoyl- $\alpha$ -L-iduronicuronate) (**6**)**

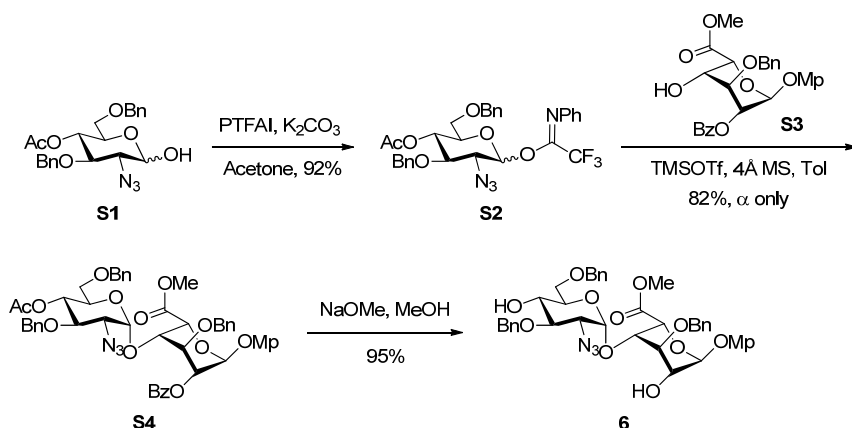

To hemiacetal **S1** (1.10 g, 2.09 mmol) in acetone (10 mL), *N*-phenyl-trifluoroacetimidoyl chloride (350  $\mu$ L, 3.13 mmol) and  $K_2CO_3$  (720 mg, 5.23 mmol) were added. Stirring was continued until TLC indicated disappearance of the starting material ( $\sim$  2 h). The mixture was concentrated. The residue was purified by silica gel column chromatography (petroleum ether/EtOAc, 4:1, containing 1%  $Et_3N$ ) to give **S2** (1.25 g, 99%) as a white solid.

Compound **S2** (778 mg, 1.3 mmol) and monosaccharide **S3** (507 mg, 1.0 mmol) were combined in a flask and co-evaporated with toluene ( $3 \times 3$  mL), and were then dissolved in toluene (20 mL). Powdered freshly activated 5Å molecular sieves (1.3 g) were added, and the mixture was stirred for 1 hour at ambient temperature and then cooled to  $-30$  °C. TMSOTf (20  $\mu$ L, 0.1 mmol) was added, and stirring was continued until TLC indicated the disappearance of the donor (2 hour). The reaction was quenched by the addition of  $Et_3N$  (0.5 mL). The mixture was filtered, and the filtrate was concentrated in vacuum. The residue was purified by silica gel column chromatography (petroleum ether/EtOAc, 4:1) to give **S4** (851 mg, 93%) as a white solid:  $[\alpha]_D^{28} = -20.9$  ( $c$  1.5,  $CHCl_3$ );  $^1H$  NMR (400 MHz,  $CDCl_3$ )  $\delta$  8.19 (d,  $J = 7.4$  Hz, 2H), 7.56–7.20 (m, 16H), 7.13–7.05 (m, 4H), 6.83 (d,  $J = 9.0$  Hz, 2H), 5.81 (s, 1H), 5.35 (s, 1H), 5.12 (t,  $J = 9.8$  Hz, 1H), 5.00 (d,  $J = 12.1$  Hz, 2H), 4.87–4.76 (m, 2H), 4.47 (dd,  $J = 24.6, 11.8$  Hz, 2H), 4.27 (s, 1H), 4.08 (dd,  $J = 23.2, 14.5$  Hz, 3H), 3.88 (s, 1H), 3.76 (s, 3H), 3.72 (s, 3H), 3.64–3.49 (m, 2H), 3.41 (dd,  $J = 11.1, 3.7$  Hz, 1H), 3.33 (dd,  $J = 10.0, 3.1$  Hz, 1H), 1.85 (s, 3H);  $^{13}C$  NMR (100 MHz,  $CDCl_3$ )  $\delta$  169.43,

169.33, 165.70, 155.41, 150.67, 137.84, 137.66, 137.60, 133.51, 130.15, 129.82, 128.70, 128.56, 128.47, 128.43, 128.12, 127.88, 127.80, 118.10, 114.80, 99.03, 98.36, 78.33, 75.32, 74.57, 73.78, 72.94, 72.72, 70.78, 70.00, 68.49, 63.37, 55.79, 52.39, 20.91; ESI-MS  $m/z$  calcd for  $C_{50}H_{51}N_3O_{14}Na$   $[M+Na]^+$  940.3263, found 940.3264.

*General Procedure for the Deprotection of the Esters.* The starting material was stirred with MeONa (1.0 equiv) in MeOH (0.2 M) until TLC indicated disappearance of the material (~ 1 h). The mixture was then neutralized with acidic resin, filtered and concentrated. The residue was purified by silica gel column chromatography (petroleum ether/EtOAc, 4:1) to give the product.

Compound **6** (500 mg, 95%) was thus obtained as a white solid:  $[\alpha]_D^{28} = -23.4$  ( $c$  1.8,  $CHCl_3$ );  $^1H$  NMR (400 MHz,  $CDCl_3$ )  $\delta$  7.52–7.27 (m, 15H), 7.13–7.02 (m, 2H), 6.91–6.79 (m, 2H), 5.69 (s, 1H), 5.05 (dd,  $J = 5.7, 2.5$  Hz, 2H), 4.93–4.79 (m, 3H), 4.71–4.58 (m, 2H), 4.53 (d,  $J = 12.0$  Hz, 1H), 4.27 (s, 1H), 4.12–3.96 (m, 2H), 3.83–3.69 (m, 9H), 3.67–3.47 (m, 3H);  $^{13}C$  NMR (100 MHz,  $CDCl_3$ )  $\delta$  169.77, 155.11, 150.71, 138.04, 137.64, 137.58, 128.70, 128.63, 128.28, 128.15, 128.10, 128.04, 127.85, 127.77, 117.70, 114.78, 100.14, 94.99, 80.87, 75.67, 73.88, 72.12, 72.03, 71.59, 70.88, 69.47, 67.66, 66.06, 63.26, 55.77, 52.52; ESI-MS  $m/z$  calcd for  $C_{41}H_{45}N_3O_{12}Na$   $[M+Na]^+$  794.2896, found 794.2920.

#### 4-Methoxyphenyl 2-amino-3,6-di-*O*-benzyl-2-deoxy- $\alpha$ -D-glucopyranosyl-(1 $\rightarrow$ 4)-(methyl 3-*O*-benzyl- $\alpha$ -L-iduropyranosiduronate) (**7**)

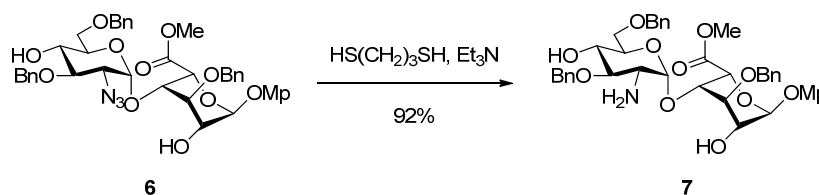

*General Procedure for the Reduction of the Azide group.* A portion of the starting material was dissolved in pyridine and  $H_2O$  (0.1 M, 4/1), protected from light and stirred with propane-1,3-dithiol (10 equiv) and trimethylamine (20 equiv) for overnight. The mixture was concentrated in vacuum, and then concentrated with toluene and ethanol (4 mL, 5/1) for three times. The residue was purified by silica gel column chromatography ( $CH_2Cl_2/MeOH$ , 20:1 + 1%  $Et_3N$ ) to give the product.

Compound **7** (130 mg, 92%) was thus prepared as a light yellow solid:  $[\alpha]_{\text{D}}^{25} = -3.0$  (*c* 0.8, MeOH);  $^1\text{H NMR}$  (400 MHz,  $\text{CDCl}_3$ )  $\delta$  7.44–7.27 (m, 15H), 7.06 (d, *J* = 9.1 Hz, 2H), 6.83 (d, *J* = 9.1 Hz, 2H), 5.64 (s, 1H), 5.07–4.89 (m, 3H), 4.83 (d, *J* = 11.5 Hz, 1H), 4.73–4.48 (m, 4H), 4.28 (s, 1H), 4.02 (s, 2H), 3.79–3.60 (m, 9H), 3.55 (dd, *J* = 9.4, 4.5 Hz, 1H), 3.50–3.40 (m, 1H), 2.90 (dd, *J* = 10.1, 3.7 Hz, 1H);  $^{13}\text{C NMR}$  (100 MHz,  $\text{CDCl}_3$ )  $\delta$  169.99, 155.09, 150.88, 138.69, 137.79, 137.71, 128.76, 128.66, 128.62, 128.08, 128.07, 128.04, 128.02, 127.94, 127.76, 117.83, 114.79, 100.45, 97.02, 82.44, 75.58, 73.94, 73.25, 71.94, 71.82, 71.16, 70.76, 70.29, 67.95, 66.28, 55.82, 54.52, 52.41; ESI-MS *m/z*  $\text{C}_{41}\text{H}_{47}\text{NO}_{12}\text{Na}$   $[\text{M}+\text{Na}]^+$  768.2991, found 768.3005.

#### 4-Methoxyphenyl

#### 2-azido-3,6-di-*O*-benzyl-4-*O*-sulfo-2-deoxy- $\alpha$ -D-glucopyranosyl-(1 $\rightarrow$ 4)-(methyl 3-*O*-benzyl-2-*O*-sulfo- $\alpha$ -L-iduropyranosiduronate) (**8**)

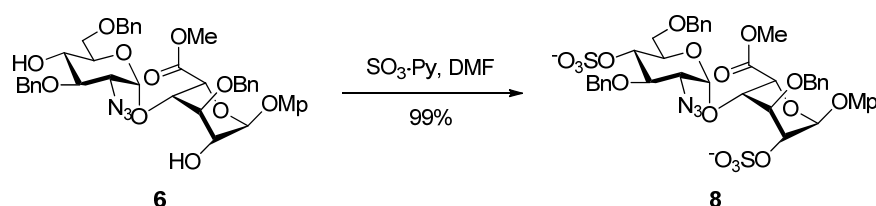

$\text{SO}_3\cdot\text{Py}$  (82 mg, 0.52 mmol) was added to a solution of disaccharide **6** (20 mg, 0.026 mmol) in DMF (1.0 mL). The mixture was stirred at ambient temperature for 4 h until TLC indicated completion of the reaction. After addition of  $\text{CH}_3\text{OH}$  (0.5 mL), stirring was continued for 15 min. The mixture was concentrated in vacuum. The residue was purified by silica gel column chromatography ( $\text{CH}_2\text{Cl}_2/\text{MeOH}$ , 15:1 + 5%  $\text{Et}_3\text{N}$ ) to give **8** (24 mg, 99%) as a white solid:  $[\alpha]_{\text{D}}^{27} = 24.8$  (*c* 0.2, MeOH);  $^1\text{H NMR}$  (400 MHz,  $\text{CDCl}_3$ )  $\delta$  7.45–7.27 (m, 6H), 7.24–7.01 (m, 9H), 6.93 (d, *J* = 8.5 Hz, 2H), 6.68 (d, *J* = 8.8 Hz, 2H), 6.02 (s, 1H), 4.93–4.61 (m, 6H), 4.56 (d, *J* = 8.8 Hz, 1H), 4.47 (d, *J* = 20.0 Hz, 3H), 4.28 (s, 2H), 4.01 (s, 2H), 3.83 (s, 1H), 3.72 (d, *J* = 9.2 Hz, 1H), 3.54 (s, 3H), 3.43 (s, 3H), 3.36 (s, 1H);  $^{13}\text{C NMR}$  (100 MHz,  $\text{CDCl}_3$ )  $\delta$  169.99, 155.09, 150.88, 138.69, 137.79, 137.71, 128.76, 128.66, 128.62, 128.08, 128.07, 128.04, 128.02, 127.94, 127.76, 117.83, 114.79, 100.45, 97.02, 82.44, 77.48, 77.16, 76.84, 75.58, 73.94, 73.25, 71.94, 71.82, 71.16, 70.76, 70.29, 67.95, 66.28, 55.82,

54.52, 52.41; ESI-MS  $m/z$  calcd for  $C_{41}H_{43}N_3O_{18}S_2 [M-2H]^{2-}$  464.6, found 465.0.

#### 4-Methoxyphenyl

#### 2-*N*-sulfo-3,6-di-*O*-benzyl-4-*O*-sulfo-2-deoxy- $\alpha$ -D-glucopyranosyl-(1 $\rightarrow$ 4)-(methyl 3-*O*-benzyl-2-*O*-sulfo- $\alpha$ -L-iduropyranosiduronate) (**9**)

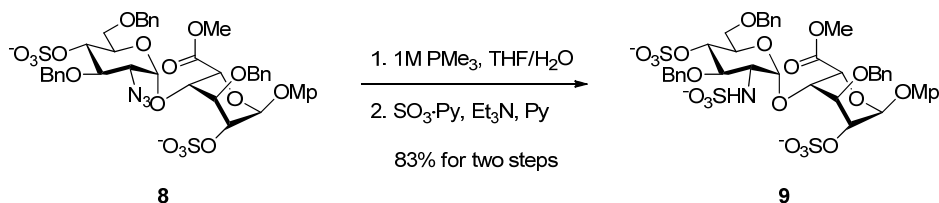

A solution of  $PMe_3$  in THF (1 M, 0.016 mL, 0.016 mmol) was added to a solution of disaccharide **8** (3.0 mg, 0.0032 mmol) in THF (1.0 mL) and  $H_2O$  (0.1 mL). The progress of the reaction was monitored by TLC (RP-18 silica gel,  $H_2O/CH_3OH$ , 1/3). The mixture was concentrated in vacuum and co-evaporated with toluene ( $3 \times 3$  mL). The residue was dissolved in pyridine (1.0 mL) and trimethylamine (0.1 mL).  $SO_3 \cdot Py$  (2.5 mg, 0.16 mmol) was added. The progress of the reaction was monitored by TLC (RP-18 silica gel,  $H_2O/CH_3OH$ , 1/3). MeOH (0.4 mL) was then added to quench the reaction. The mixture was concentrated in vacuum. The residue was purified by a small RP-18 silica gel column ( $H_2O/CH_3OH$ , 1/0 to 1/9 to 1/2). The fractions containing product were concentrated in vacuum, and the residue was immediately passed through a column of Dowex 50WX4  $Na^+$  resin ( $CH_3OH/H_2O$ , 9/1). The fractions containing product were concentrated in vacuum to provide **9** (2.6 mg, 83%) as a white solid:  $[\alpha]_D^{28} = 5.7$  ( $c$  0.1, MeOH);  $^1H$  NMR (400 MHz,  $CD_3OD$ )  $\delta$  7.65 (d,  $J = 7.2$  Hz, 2H), 7.53–7.15 (m, 12H), 7.05 (d,  $J = 9.0$  Hz, 2H), 6.85 (d,  $J = 9.0$  Hz, 2H), 5.88 (s, 1H), 5.43 (d,  $J = 3.2$  Hz, 1H), 5.05–4.93 (m, 3H), 4.80–4.71 (m, 2H), 4.66 (d,  $J = 11.8$  Hz, 1H), 4.53 (d,  $J = 10.6$  Hz, 3H), 4.28 (s, 1H), 3.98–3.70 (m, 8H), 3.65 (s, 3H), 3.54 (dd,  $J = 10.7, 3.2$  Hz, 1H);  $^{13}C$  NMR (125 MHz,  $CD_3OD$ )  $\delta$  171.28, 156.64, 151.87, 139.92, 139.66, 130.46, 129.26, 129.21, 129.18, 128.98, 128.78, 128.55, 128.43, 128.32, 119.09, 115.63, 99.66, 99.45, 79.02, 77.49, 75.50, 74.39, 74.33, 74.27, 73.20, 72.48, 72.29, 69.90, 68.59, 58.76, 56.03, 53.06; ESI-MS  $m/z$  calcd for  $C_{41}H_{45}NO_{21}S_3 [M-2H]^{2-}$  491.6, found 492.2.



#### 4-Methoxyphenyl

#### 2-amino-3,6-di-*O*-benzyl-4-*O*-sulfo-2-deoxy- $\alpha$ -D-glucopyranosyl-(1 $\rightarrow$ 4)-(methyl 3-*O*-benzyl-2-*O*-sulfo- $\alpha$ -L-iduropyranosiduronate) (**10**)

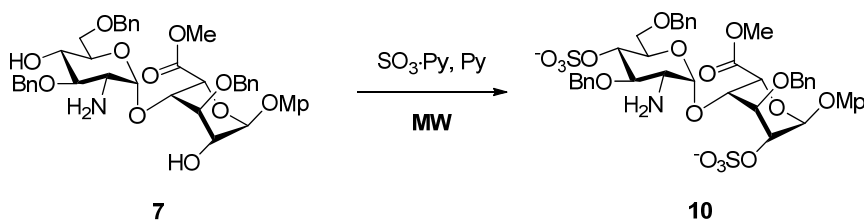

SO<sub>3</sub>·Py (32 mg, 0.201 mmol) was added to a solution of disaccharide **7** (10 mg, 0.013 mmol) in pyridine (1.0 mL). The mixture was stirred at room temperature for 5 min, then subjected to microwave radiation for 15 min at a fix temperature of 55 °C (average power of 18 W). The progress of the reaction was monitored by TLC (RP-18 silica gel, H<sub>2</sub>O/CH<sub>3</sub>OH, v/v = 1/3). The mixture was subjected to microwave radiation for 15 min at 55 °C (fix temperature) twice. After the addition of CH<sub>3</sub>OH (0.5 mL) stirring was continued for 15 min. The mixture was concentrated in vacuum. The residue was applied to a small RP-18 silica gel column (H<sub>2</sub>O/CH<sub>3</sub>OH, 1/0 to 1/9 to 1/4). The fractions containing the product were concentrated in vacuum. The residue was immediately passed through a column of Dowex 50WX4 Na<sup>+</sup> resin (CH<sub>3</sub>OH). The fractions containing the product were concentrated in vacuum to provide **10** (8.0 mg, 66%) as a white solid:  $[\alpha]_D^{28} = 26.4$  (*c* 1.0, MeOH); <sup>1</sup>H NMR (400 MHz, CD<sub>3</sub>OD)  $\delta$  7.51 (d, *J* = 7.0 Hz, 2H), 7.31 (m, 13H), 7.03 (d, *J* = 9.1 Hz, 2H), 6.87 (d, *J* = 9.1 Hz, 2H), 5.79 (s, 1H), 5.36 (t, *J* = 6.6 Hz, 2H), 5.08 (s, 1H), 4.72–4.52 (m, 5H), 4.43 (t, *J* = 9.4 Hz, 1H), 4.34 (d, *J* = 19.4 Hz, 2H), 4.10 (d, *J* = 9.6 Hz, 1H), 3.93–3.63 (m, 9H); <sup>13</sup>C NMR (100 MHz, MeOD)  $\delta$  171.13, 156.92, 151.68, 139.85, 139.34, 138.82, 130.24, 129.47, 129.29, 129.12, 129.01, 128.94, 128.91, 128.75, 128.53, 119.15, 115.81, 99.53, 92.45, 77.98, 77.80, 76.38, 74.43, 73.09, 72.87, 70.41, 69.86, 69.26, 68.14, 56.09, 54.83, 53.32; ESI-MS *m/z* calcd for C<sub>41</sub>H<sub>46</sub>NO<sub>18</sub>S<sub>2</sub> [M-H]<sup>-</sup> 904.2, found 904.8.

*The reaction temperature was elevated to 100 °C.* SO<sub>3</sub>·Py (19.0 mg, 0.120 mmol) was added to a solution of disaccharide **7** (6.0 mg, 0.008 mmol) in pyridine (1.0 mL). The mixture was stirred at room temperature for 5 min, then subjected to microwave

radiation for 15 min at a fix temperature of 100 °C (average power of 18 W). The progress of the reaction was monitored by TLC (RP-18 silica gel, H<sub>2</sub>O/CH<sub>3</sub>OH, v/v = 1/3). After the addition of CH<sub>3</sub>OH (0.5 mL), stirring was continued for 15 min. The mixture was concentrated in vacuum. The residue was applied to a small RP-18 silica gel column, which was eluted with a stepwise gradient of H<sub>2</sub>O and CH<sub>3</sub>OH (from v/v = 1/0, to 1/9, to 1/4). The fractions containing the product were concentrated in vacuum. The residue was immediately passed through a column of Dowex 50WX4 Na<sup>+</sup> resin using CH<sub>3</sub>OH as eluent. The fractions containing the product were concentrated in vacuum to provide **10** (7.0 mg, 96%) as a white solid.

#### 4-Methoxyphenyl

#### 2-*N*-sulfo-3,6-di-*O*-benzyl-4-*O*-sulfo-2-deoxy- $\alpha$ -D-glucopyranosyl-(1 $\rightarrow$ 4)-(methyl 3-*O*-benzyl-2-*O*-sulfo- $\alpha$ -L-iduropyranosiduronate) (**9**)

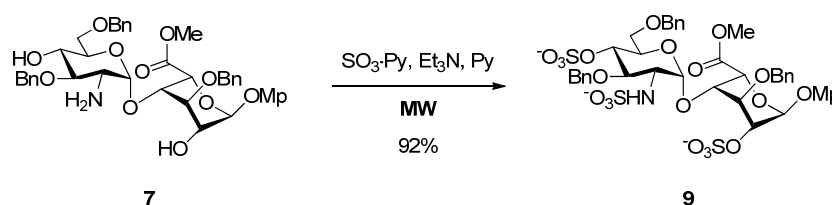

*General Procedure for the Microwave-assisted Simultaneous O,N-Sulfonation with SO<sub>3</sub>·Py.* SO<sub>3</sub>·Py (5 equiv per OH/NH<sub>2</sub>) was added to a solution of the starting material in pyridine (1.0 mL for 20 - 30 mg starting material). Then trimethylamine (0.1 mL) was added. The mixture was stirred at room temperature for 5 min, then subjected to microwave radiation for 15 min at a fix temperature of 100 °C (average power of 18 W). The color changed from light yellow to dark red. After the addition of CH<sub>3</sub>OH (0.5 mL) stirring was continued for 15 min. The mixture was concentrated in vacuum. The residue was applied to a small RP-18 silica gel column, which was eluted with a stepwise gradient of H<sub>2</sub>O and CH<sub>3</sub>OH (from v/v = 1/0, to 1/9, to 1/2). The fractions containing the product were concentrated in vacuum. The residue was immediately passed through a column of Dowex 50WX4 Na<sup>+</sup> resin using a mixture of CH<sub>3</sub>OH and H<sub>2</sub>O (v/v = 9/1) as eluent. The fractions containing the product were concentrated in vacuum to provide the product as sodium salt.

Compound **9** (30.4 mg, 92%) was thus obtained as a white solid.

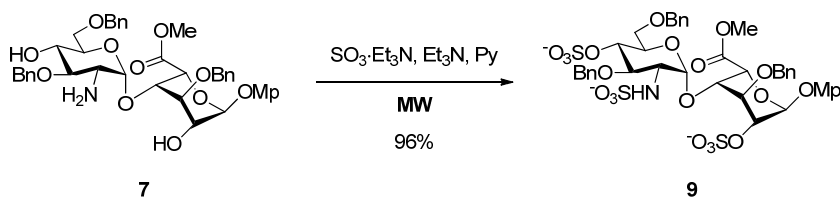

*General Procedure for the Microwave-assisted Simultaneous O,N-Sulfonation with  $SO_3 \cdot NEt_3$ .*  $SO_3 \cdot NEt_3$  (5 equiv per OH/ $NH_2$ ) was added to a solution of the starting material in pyridine (1.0 mL for 20-30 mg starting material). Then trimethylamine (0.1 mL) was added. The mixture was stirred at room temperature for 5 min, then subjected to microwave radiation for 15 min at a fix temperature of 100 °C (average power of 18 W). The color was changed from light yellow to dark red. After the addition of  $CH_3OH$  (0.5 mL), stirring was continued for 15 min. The mixture was concentrated in vacuum. The residue was applied to a small RP-18 silica gel column, which was eluted with a stepwise gradient of  $H_2O$  and  $CH_3OH$  (from v/v = 1/0, to 1/9, to 1/2). The fractions containing the product were concentrated in vacuum. The residue was immediately passed through a column of Dowex 50WX4  $Na^+$  resin using a mixture of  $CH_3OH$  and  $H_2O$  (v/v = 9/1) as eluent. The fractions containing the product were concentrated in vacuum to provide the product as sodium salt.

Compound **9** (31.7 mg, 96%) was thus obtained as a white solid.

#### 4-Methoxyphenyl

#### 2-N-sulfo-3,6-di-O-benzyl-2-deoxy- $\alpha$ -D-glucopyranosyl-(1 $\rightarrow$ 4)-(methyl 3-O-benzyl- $\beta$ -D-glucopyranosiduronate) (**11**)

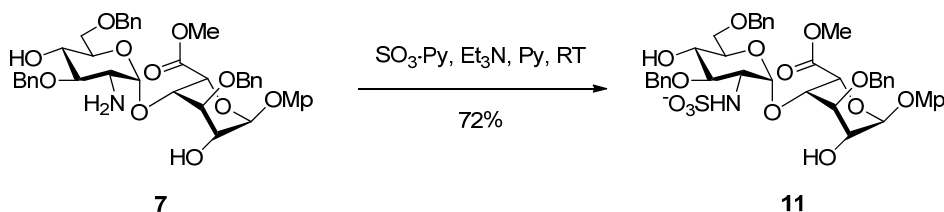

$SO_3 \cdot Py$  (38.0 mg, 0.24 mmol) was added to a solution of disaccharide **7** (12.0 mg, 0.016 mmol) in pyridine (1.0 mL). The mixture was stirred at room temperature for overnight. TLC monitor (RP-18 silica gel,  $H_2O/CH_3OH$ , v/v = 1/3) indicated the completion of the reaction. After the addition of  $CH_3OH$  (0.5 mL) and trimethylamine

(1.0 mL), stirring was continued for 15 min. The mixture was concentrated in vacuum. The residue was applied to a small RP-18 silica gel column, which was eluted with a stepwise gradient of H<sub>2</sub>O and CH<sub>3</sub>OH (from v/v = 1/0, to 1/9, to 1/3). The fractions containing the product were concentrated in vacuum. The residue was immediately passed through a column of Dowex 50WX4 Na<sup>+</sup> resin using a mixture of CH<sub>3</sub>OH and H<sub>2</sub>O (v/v = 9/1) as eluent. The fractions containing the product were concentrated in vacuum to provide the product **11** (9.6 mg, 72%) as a white solid:  $[\alpha]_D^{28} = 7.7$  (*c* 0.3, MeOH); <sup>1</sup>H NMR (400 MHz, CD<sub>3</sub>OD)  $\delta$  7.55–7.15 (m, 15H), 7.03 (d, *J* = 9.1 Hz, 2H), 6.85 (d, *J* = 9.1 Hz, 2H), 5.51 (s, 1H), 5.44 (d, *J* = 3.2 Hz, 1H), 5.01 (d, *J* = 10.9 Hz, 1H), 4.93 (s, 1H), 4.82–4.67 (m, 3H), 4.58 (s, 2H), 4.30 (s, 1H), 4.20 (s, 1H), 4.05 (s, 1H), 3.81–3.63 (m, 8H), 3.61–3.41 (m, 4H); <sup>13</sup>C NMR (100 MHz, MeOD)  $\delta$  171.54, 156.54, 152.06, 140.54, 139.72, 129.35, 129.32, 129.07, 128.88, 128.66, 128.58, 128.29, 118.92, 115.64, 101.56, 97.99, 80.95, 75.53, 74.66, 73.68, 73.33, 73.27, 71.42, 70.75, 68.87, 67.69, 59.11, 56.03, 53.04; ESI-MS *m/z* calcd for C<sub>41</sub>H<sub>46</sub>NO<sub>15</sub>S [M-H]<sup>-</sup> 824.3, found 824.7.

**Methyl 2-azido-3,4-di-*O*-benzyl-2-deoxy- $\alpha$ -D-glucopyranosyl-(1 $\rightarrow$ 4)-(methyl 3-*O*-benzyl- $\beta$ -D-glucopyranosiduronate)-(1 $\rightarrow$ 4)-2-azido-3-*O*-benzyl-2-deoxy- $\alpha$ -D-glucopyranoside (**S6**)**

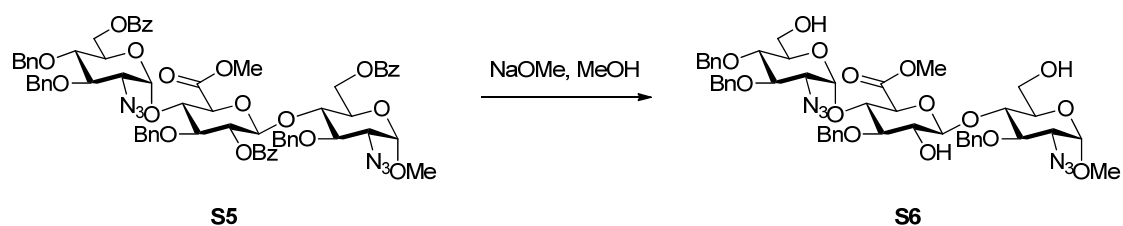

The general procedure for the deprotection of the esters was applied to provide compound **S6** (151 mg, 90%) as a white solid:  $[\alpha]_D^{22} = 76.3$  (*c* 0.8, CHCl<sub>3</sub>); <sup>1</sup>H NMR (400 MHz, CDCl<sub>3</sub>)  $\delta$  7.63–6.91 (m, 20H), 5.48 (d, *J* = 3.7 Hz, 1H), 4.94 (t, *J* = 11.2 Hz, 2H), 4.90–4.80 (m, 4H), 4.78 (dd, *J* = 7.1, 3.5 Hz, 2H), 4.67 (dd, *J* = 15.5, 9.3 Hz, 2H), 4.10–3.59 (m, 14H), 3.53 (t, *J* = 9.4 Hz, 1H), 3.45–3.18 (m, 7H); <sup>13</sup>C NMR (100 MHz, CDCl<sub>3</sub>)  $\delta$  168.76, 138.26, 137.92, 137.84, 137.77, 128.65, 128.64, 128.61,

128.54, 128.20, 128.08, 128.06, 127.96, 127.90, 127.84, 103.06, 98.85, 97.70, 83.87, 79.93, 79.10, 77.75, 77.36, 76.06, 75.57, 75.34, 75.15, 75.10, 74.98, 74.84, 74.67, 72.14, 70.99, 63.72, 63.50, 61.32, 60.94, 55.49, 52.91; ESI-MS  $m/z$  calcd for  $C_{48}H_{56}N_6O_{15}Na$   $[M+Na]^+$  979.3696, found 979.3693.

**Methyl 2-amino-3,4-di-*O*-benzyl-2-deoxy- $\alpha$ -D-glucopyranosyl-(1 $\rightarrow$ 4)-(methyl 3-*O*-benzyl- $\beta$ -D-glucopyranosiduronate)-(1 $\rightarrow$ 4)-2-amino-3-*O*-benzyl-2-deoxy- $\alpha$ -D-glucopyranoside (12)**

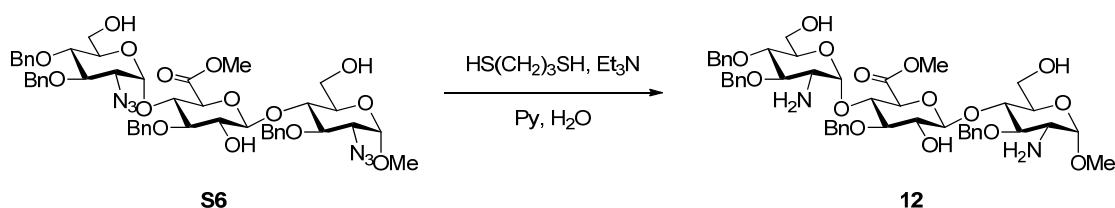

The general procedure for the reduction of the azide was applied to provide compound **12** (135 mg, 95%) as a light yellow solid:  $[\alpha]_D^{22} = 94.6$  ( $c$  0.6,  $\text{CHCl}_3$ );  $^1\text{H}$  NMR (400 MHz,  $\text{CD}_3\text{OD}$ )  $\delta$  7.55–7.14 (m, 20H), 5.23 (d,  $J = 3.4$  Hz, 1H), 5.14 (t,  $J = 10.6$  Hz, 2H), 4.85–4.61 (m, 6H), 4.55 (d,  $J = 11.0$  Hz, 1H), 4.12–3.97 (m, 3H), 3.93–3.82 (m, 2H), 3.80–3.64 (m, 7H), 3.64–3.45 (m, 6H), 3.40 (s, 3H), 3.37–3.27 (m, 2H), 2.67 (dd,  $J = 10.0, 3.6$  Hz, 2H);  $^{13}\text{C}$  NMR (100 MHz,  $\text{CD}_3\text{OD}$ )  $\delta$  170.45, 140.35, 139.99, 139.96, 139.86, 129.67, 129.45, 129.40, 129.38, 129.36, 129.00, 128.78, 128.70, 128.63, 104.69, 101.13, 100.84, 84.88, 83.67, 82.94, 79.27, 78.98, 77.30, 76.35, 76.27, 76.19, 75.60, 75.55, 74.26, 73.03, 61.25, 56.93, 56.43, 55.50, 53.08; ESI-MS  $m/z$  calcd for  $C_{48}H_{60}N_2O_{15}Na$  927.3886  $[M+Na]^+$ , found 927.3886.

**Methyl 2-*N*-sulfo-3,4-di-*O*-benzyl-6-*O*-sulfo-2-deoxy- $\alpha$ -D-glucopyranosyl-(1 $\rightarrow$ 4)-(methyl 3-*O*-benzyl-2-*O*-sulfo- $\beta$ -D-glucopyranosiduronate)-(1 $\rightarrow$ 4)-2-*N*-sulfo-3-*O*-benzyl-6-*O*-sulfo-2-deoxy- $\alpha$ -D-glucopyranoside (13)**

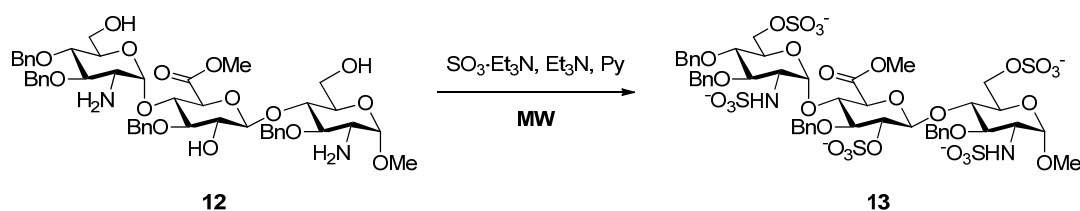

The general procedure for the microwave-assisted simultaneous *O,N*-sulfonation

with  $SO_3 \cdot NEt_3$  was applied to provide compound **13** (30 mg, 95%) as a white solid:  $[\alpha]_D^{25} = 38.1$  ( $c$  0.2, MeOH);  $^1H$  NMR (400 MHz,  $CD_3OD$ )  $\delta$  7.81–6.96 (m, 20H), 5.38 (brs,  $J = 3.4$  Hz, 1H), 5.15–5.05 (m, 3H), 5.02 (d,  $J = 11.2$  Hz, 1H), 4.95 (d,  $J = 10.8$  Hz, 1H), 4.82–4.73 (m, 1H), 4.70 (d,  $J = 11.0$  Hz, 2H), 4.54 (t, 1H), 4.32 (d,  $J = 8.4$  Hz, 1H), 4.27–4.19 (m, 2H), 4.18–4.07 (m, 3H), 3.96 (d,  $J = 6.1$  Hz, 2H), 3.76–3.52 (m, 11H), 3.51–3.37 (m, 4H);  $^{13}C$  NMR (100 MHz,  $CD_3OD$ )  $\delta$  170.78, 140.62, 140.28, 140.07, 139.00, 130.33, 129.40, 129.32, 129.16, 129.14, 129.09, 129.05, 128.73, 128.38, 128.24, 128.19, 102.20, 99.97, 99.83, 81.66, 80.51, 80.17, 79.44, 78.65, 78.50, 77.13, 76.41, 75.90, 74.94, 74.46, 71.43, 70.22, 67.18, 66.95, 59.67, 58.42, 58.29, 55.78, 53.25; ESI-MS  $m/z$  calcd for  $C_{48}H_{58}N_2O_{30}S_5$   $[M-2H]^{2-}$  651.1, found 651.5;  $C_{48}H_{57}N_2O_{30}S_5$   $[M-3H]^{3-}$  433.7, found 434.1.

### d3-Methyl 2-amino-2-deoxy-3,4-di-*O*-benzyl- $\beta$ / $\alpha$ -D-glucopyranosides (**14** and **16**)

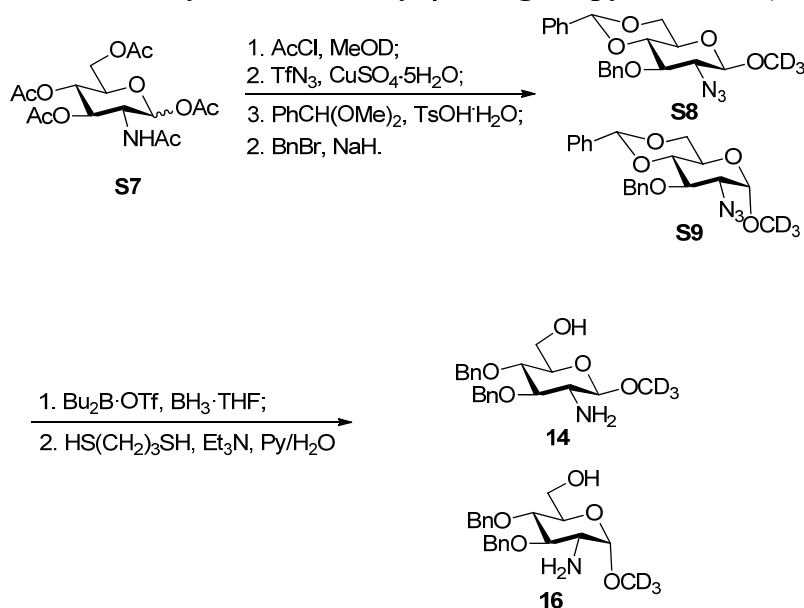

To a solution of pentaacetyl glucosamine **S7** (500 mg, 1.28 mol) in  $CD_3OD$  (10 mL) was slowly added acetyl chloride (1 mL) at 0 °C. Stirring was continued for another 15 min. The reaction mixture was heated to reflux for 8 h. TLC analysis showed complete consumption of the starting material. The mixture was cooled to room temperature and concentrated in vacuum.

The residue was dissolved in methanol (4 mL),  $CuSO_4 \cdot H_2O$  (2 mg) and  $NEt_3$  (0.36 mL) were added. The mixture was cooled to 0 °C, then fresh  $TfN_3$  in  $CH_3CN$

---

was added dropwise. The mixture was slowly warmed to room temperature. After 24 h, TLC analysis showed completed disappearance of the starting material. The reaction mixture was concentrated and the residue was co-evaporated twice with toluene and dissolved in acetonitrile (5 mL). Benzaldehyde dimethyl acetal (224  $\mu$ L, 1.48 mmol) and *p*-toluenesulfonic acid monohydrate (10 mg) were added to adjust pH = ~3, stirring was continued until TLC indicated disappearance of the raw material. Triethylamine was added and the solvent was evaporated.

The residue was dissolved in DMF (6 mL). The mixture was cooled to 0 °C, then NaH (60%) was added in batches. After 30 min, BnBr (224  $\mu$ L, 1.84 mmol) was added, After 2 h, TLC analysis showed disappearance of the starting material. MeOH (2 mL) was then added to quench the reaction. The mixture was poured into CH<sub>2</sub>Cl<sub>2</sub>, and washed with brine twice. The organic layer was dried over Na<sub>2</sub>SO<sub>4</sub> and filtered. The filtrate was concentrated in vacuum. The residue was purified by silica gel column chromatography (petroleum ether/EtOAc, 8:1) to give the  $\beta$ -product **S8** (123 mg, 12%) and  $\alpha$ -product **S9** (368 mg, 36%) as white solids.

**S9**: <sup>1</sup>H NMR (400 MHz, CDCl<sub>3</sub>)  $\delta$  7.49-7.26 (m, 10 H), 5.56 (s, 1 H), 4.95 (d, 1 H, *J* = 10.8 Hz), 4.80–4.75 (m, 2 H), 4.27 (dd, 1 H, *J* = 10.0 Hz, 4.4 Hz), 4.05 (t, 1 H, *J* = 9.2 Hz), 3.86–3.66 (m, 3 H), 3.42 (dd, 1 H, *J* = 10.0 Hz, 3.2 Hz); <sup>13</sup>C NMR (100 MHz, CDCl<sub>3</sub>)  $\delta$  137.92, 137.32, 129.11, 128.48, 128.35, 128.29, 127.94, 127.84, 126.09, 101.50, 99.40, 82.83, 76.40, 75.07, 68.98, 63.22, 62.64; ESI-MS 423.3 [M+Na]<sup>+</sup>.

Compound **S8** (72 mg, 0.18 mmol) was dissolved in BH<sub>3</sub>·THF (1 M, 1.8 mL, 1.8 mmol) under nitrogen and cooled to 0 °C. After 15 min, Bu<sub>2</sub>B·OTf (1 M, 0.18 mL, 0.18 mmol) was added dropwise and stirring was continued at 0 °C for 2 h. The reaction mixture was quenched by the addition of Et<sub>3</sub>N and the excess BH<sub>3</sub>·THF was consumed by slowly adding methanol. The solvent was removed in vacuum, and was then co-evaporated with methanol twice to give a residue: ESI-MS *m/z* 425.2 [M+Na]<sup>+</sup>.

The residue was dissolved in pyridine (1 mL) and water (0.25 mL), trimethylamine (0.04 mL) and propane-1,3-dithiol (0.08 mL) were added. TLC

---

analysis showed complete disappearance of the starting material. The mixture was concentrated in vacuum, and was then co-evaporated with toluene/ethanol (5 mL, v/v = 5/1) twice. The residue was purified by silica gel column chromatography (CH<sub>2</sub>Cl<sub>2</sub>/MeOH, 20: 1 + 1% Et<sub>3</sub>N) to give compound **14** (56 mg, 85%) as a light yellow solid:  $[\alpha]_D^{24} = 3.8$  (*c* 0.9, CHCl<sub>3</sub>); <sup>1</sup>H NMR (400 MHz, CDCl<sub>3</sub>)  $\delta$  7.47–7.18 (m, 10H), 4.97 (d, *J* = 11.3 Hz, 1H), 4.84 (d, *J* = 10.9 Hz, 1H), 4.71 (dd, *J* = 11.1, 6.1 Hz, 2H), 4.15 (d, *J* = 7.9 Hz, 1H), 3.88 (dd, *J* = 12.0, 2.1 Hz, 1H), 3.76 (dd, *J* = 12.0, 4.0 Hz, 1H), 3.66 (t, *J* = 9.3 Hz, 1H), 3.47 (t, *J* = 9.4 Hz, 1H), 3.42–3.33 (m, 1H), 2.80 (dd, *J* = 9.7, 8.0 Hz, 1H); <sup>13</sup>C NMR (100 MHz, CDCl<sub>3</sub>)  $\delta$  138.26, 137.89, 128.53, 128.49, 127.92, 127.89, 127.86, 127.82, 104.75, 84.57, 78.21, 75.60, 75.30, 74.82, 61.37, 56.94; ESI-MS *m/z* calcd for C<sub>21</sub>H<sub>24</sub>D<sub>3</sub>NO<sub>5</sub>Na [M+Na]<sup>+</sup> 399.1970, found 399.1962.

Compound **S9** (72 mg, 0.18 mmol) was dissolved in BH<sub>3</sub>·THF (1 M, 1.8 mL, 1.8 mmol) under nitrogen and cooled to 0 °C. After 15 min, Bu<sub>2</sub>B·OTf (1 M, 0.18 mL, 0.18 mmol) was added dropwise and the stirring was continued at 0 °C for 2 h. The reaction mixture was quenched by the addition of Et<sub>3</sub>N and the excess BH<sub>3</sub>·THF was consumed by slowly adding methanol. The solvent was removed in vacuum with co-evaporation with methanol twice. ESI-MS *m/z* 425.2 [M+Na<sup>+</sup>].

The residue was dissolved in pyridine (1 mL) and water (0.25 mL), trimethylamine (0.04 mL) and propane-1,3-dithiol (0.08 mL) were added. TLC showed complete disappearance of the starting material. The mixture was concentrated in vacuum, and co-evaporated with toluene/ethanol (5 mL, v/v = 5/1) twice. The residue was purified by silica gel column chromatography (CH<sub>2</sub>Cl<sub>2</sub>/MeOH, 20:1 + 1% Et<sub>3</sub>N) to give compound **16** (60 mg, 89%) as a white solid:  $[\alpha]_D^{25} = 122.2$  (*c* 1.4, CHCl<sub>3</sub>); <sup>1</sup>H NMR (400 MHz, CDCl<sub>3</sub>)  $\delta$  7.63–6.91 (m, 20H), 5.48 (d, *J* = 3.7 Hz, 1H), 4.94 (t, *J* = 11.2 Hz, 2H), 4.90–4.80 (m, 4H), 4.78 (dd, *J* = 7.1, 3.5 Hz, 2H), 4.67 (dd, *J* = 15.5, 9.3 Hz, 2H), 4.10–3.59 (m, 14H), 3.53 (t, *J* = 9.4 Hz, 1H), 3.45–3.18 (m, 6H); <sup>13</sup>C NMR (100 MHz, CDCl<sub>3</sub>)  $\delta$  138.57, 138.15, 128.66, 128.62, 128.01, 127.96, 100.50, 83.70, 78.72, 77.48, 77.16, 76.84, 75.69, 74.89, 71.61, 61.78, 56.07; ESI-MS *m/z* calcd for C<sub>21</sub>H<sub>24</sub>D<sub>3</sub>NO<sub>5</sub>Na [M+Na]<sup>+</sup> 399.1970, found 399.1964.



### Methyl 2-amino-2-deoxy-3,4-di-*O*-benzyl- $\alpha$ -D-glucopyranose (**18**)

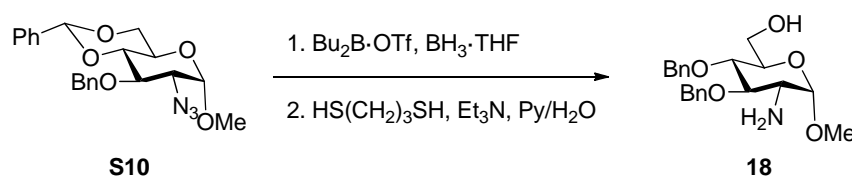

Compound **S10** (200 mg, 0.50 mmol) was dissolved in  $\text{BH}_3\cdot\text{THF}$  (1 M, 5.0 mL, 5.0 mmol) under nitrogen and cooled to 0 °C. After 15 min,  $\text{Bu}_2\text{B}\cdot\text{OTf}$  (1 M, 0.50 mL, 0.50 mmol) was added dropwise and the stirring was continued at 0 °C for 2 h. The reaction mixture was quenched by addition of  $\text{Et}_3\text{N}$  and the excess  $\text{BH}_3\cdot\text{THF}$  was consumed by slowly adding methanol. The solvent was removed in vacuum, and then co-evaporated with methanol twice. ESI-MS  $m/z$  422.3  $[\text{M}+\text{Na}^+]$ .

The residue was dissolved in pyridine (2 mL) and water (0.5 mL), trimethylamine (0.08 mL) and propane-1,3-dithiol (0.16 mL) were added. TLC analysis showed complete disappearance of the starting material. The mixture was concentrated in vacuum, and then co-evaporated with toluene/ethanol (5 mL, v/v = 5/1) twice. The residue was purified by silica gel column chromatography ( $\text{CH}_2\text{Cl}_2/\text{MeOH}$ , 20:1 + 1%  $\text{Et}_3\text{N}$ ) to give compound **18** (150 mg, 93%) as a white solid:  $[\alpha]_{\text{D}}^{22} = 110.8$  ( $c$  1.9,  $\text{CHCl}_3$ );  $^1\text{H}$  NMR (400 MHz,  $\text{CDCl}_3$ )  $\delta$  7.48–7.13 (m, 10H), 4.97 (d,  $J = 11.4$  Hz, 1H), 4.85 (d,  $J = 11.0$  Hz, 1H), 4.78–4.58 (m, 3H), 3.88–3.48 (m, 5H), 3.35 (s, 3H), 2.75 (dd,  $J = 9.4, 3.5$  Hz, 1H);  $^{13}\text{C}$  NMR (100 MHz,  $\text{CDCl}_3$ )  $\delta$  138.60, 138.17, 128.66, 128.00, 100.67, 83.89, 78.73, 77.48, 77.16, 76.84, 75.71, 74.88, 71.63, 61.78, 56.14, 55.22; ESI-MS  $m/z$  calcd for  $\text{C}_{21}\text{H}_{27}\text{NO}_5\text{Na}$   $[\text{M}+\text{Na}]^+$  396.1782, found 396.1790.

### d3-Methyl 2-*N*-sulfo-2-deoxy-3,4-di-*O*-benzyl-6-*O*-sulfo- $\beta$ -D-glucopyranoside (**15**)

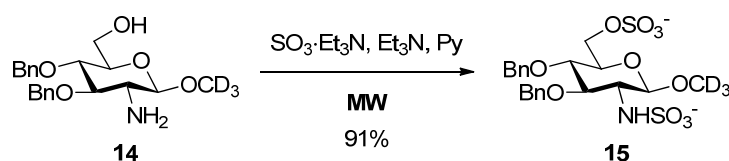

The general procedure for the microwave-assisted simultaneous *O,N*-sulfonation with  $\text{SO}_3\cdot\text{NEt}_3$  was applied to provide compound **15** (26 mg, 91%) as a white solid:

$[\alpha]_D^{25} = -26.9$  ( $c$  0.2, MeOH);  $^1\text{H}$  NMR (300 MHz,  $\text{CD}_3\text{OD}$ )  $\delta$  7.57–7.13 (m, 10H), 5.17 (d,  $J = 10.7$  Hz, 1H), 4.83 (d,  $J = 10.7$  Hz, 3H), 4.69 (d,  $J = 6.2$  Hz, 1H), 4.36 (s, 2H), 4.00 (s, 1H), 3.73 (s, 3H);  $^{13}\text{C}$  NMR (100 MHz,  $\text{CD}_3\text{OD}$ )  $\delta$  140.21, 139.66, 129.37, 129.21, 129.21, 129.18, 128.58, 128.43, 104.19, 82.82, 78.68, 75.31, 75.25, 74.64, 67.86, 60.56; ESI-MS  $m/z$  calcd for  $\text{C}_{21}\text{H}_{22}\text{D}_3\text{NO}_{11}\text{S}_2$   $[\text{M}-2\text{H}]^{2-}$  267.1, found 267.0.

### d3-Methyl 2-*N*-sulfo-2-deoxy-3,4-di-*O*-benzyl-6-*O*-sulfo- $\alpha$ -D-glucopyranoside (17)

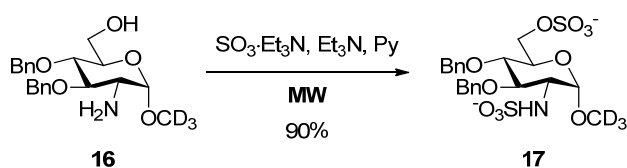

The general procedure for the microwave-assisted simultaneous *O,N*-sulfonation with  $\text{SO}_3 \cdot \text{NEt}_3$  was applied to provide compound **17** (35 mg, 90%) as a white solid:  $[\alpha]_D^{25} = 37.8$  ( $c$  0.2, MeOH);  $^1\text{H}$  NMR (400 MHz,  $\text{CD}_3\text{OD}$ )  $\delta$  7.42 (d,  $J = 6.6$  Hz, 2H), 7.37–7.16 (m, 7H), 5.08 (dd,  $J = 7.1, 3.4$  Hz, 2H), 4.80–4.66 (m, 3H), 4.27 (d,  $J = 3.1$  Hz, 2H), 3.80 (dt,  $J = 9.8, 3.0$  Hz, 1H), 3.71–3.52 (m, 2H), 3.47 (dd,  $J = 10.1, 3.6$  Hz, 1H);  $^{13}\text{C}$  NMR (100 MHz,  $\text{CD}_3\text{OD}$ )  $\delta$  140.20, 139.70, 129.36, 129.21, 129.18, 129.14, 128.56, 128.42, 100.14, 81.93, 78.99, 76.20, 75.94, 70.55, 67.66, 59.50; ESI-MS  $m/z$  calcd for  $\text{C}_{21}\text{H}_{23}\text{D}_3\text{NO}_{11}\text{S}_2$   $[\text{M}-\text{H}]^-$  535.1, found 535.3;  $\text{C}_{21}\text{H}_{22}\text{D}_3\text{NO}_{11}\text{S}_2$   $[\text{M}-2\text{H}]^{2-}$  267.1, found 267.2.

### Methyl 2-*N*-sulfo-2-deoxy-3,4-di-*O*-benzyl-6-*O*-sulfo- $\alpha$ -D-glucopyranose (19)

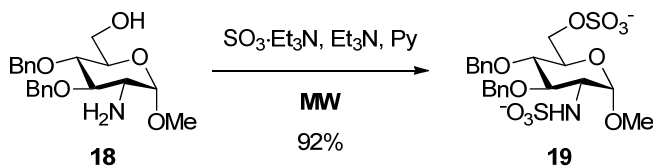

The general procedure for the microwave-assisted simultaneous *O,N*-sulfonation with  $\text{SO}_3 \cdot \text{NEt}_3$  was applied to provide compound **19** (39 mg, 92%) as a white solid:  $^1\text{H}$  NMR (400 MHz,  $\text{CD}_3\text{OD}$ )  $\delta$  7.46–7.38 (m, 2H), 7.34–7.18 (m, 8H), 5.12 – 4.99 (m, 2H), 4.81 – 4.67 (m, 3H), 4.27 (d,  $J = 3.2$  Hz, 2H), 3.80 (dt,  $J = 9.8, 3.1$  Hz, 1H), 3.61 (dt,  $J = 18.7, 9.0$  Hz, 2H), 3.47 (dd,  $J = 10.1, 3.6$  Hz, 1H), 3.43 (s, 3H);  $^{13}\text{C}$  NMR

(100 MHz, CD<sub>3</sub>OD)  $\delta$  140.22, 139.71, 129.37, 129.23, 129.18, 129.14, 128.57, 128.42, 100.22, 81.95, 78.99, 76.22, 75.95, 70.56, 67.66, 59.51, 55.82; ESI-MS  $m/z$  calcd for C<sub>21</sub>H<sub>26</sub>NO<sub>11</sub>S<sub>2</sub> [M-H]<sup>-</sup> 532.1, found 532.3; C<sub>21</sub>H<sub>24</sub>NO<sub>11</sub>S<sub>2</sub> [M-2H]<sup>2-</sup> 265.6, found 265.7.

**Methyl 2-amino-3-*O*-benzyl-2-deoxy- $\alpha$ -D-glucopyranosyl-(1 $\rightarrow$ 4)-(methyl  $\alpha$ -D-glucopyranosiduronate) (20)**

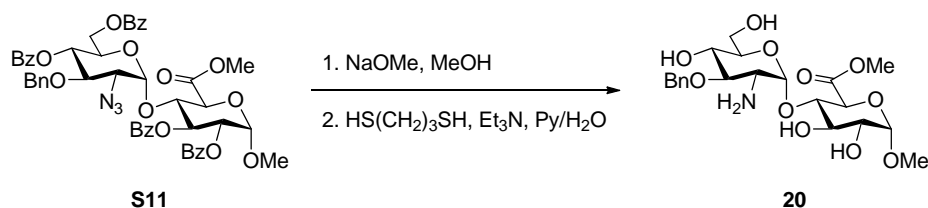

The general procedures for the deprotection of the ester and the reduction of the azide were applied to provide compound **20** (35 mg, 66%) as a light yellow solid:  $[\alpha]_D^{22} = 169.9$  ( $c$  1.0, MeOH); <sup>1</sup>H NMR (400 MHz, CD<sub>3</sub>OD)  $\delta$  7.43–7.28 (m, 5H), 5.28 (d,  $J = 3.6$  Hz, 1H), 5.02 (d,  $J = 11.2$  Hz, 1H), 4.74–4.71 (m, 2H), 4.2 (d,  $J = 11.2$  Hz, 1H), 3.81–3.48 (m, 8H), 3.48–3.43 (m, 7H), 2.71 (dd,  $J = 4.0, 10.4$  Hz, 1H); <sup>13</sup>C NMR (100 MHz, CD<sub>3</sub>OD)  $\delta$  171.32, 140.29, 129.37, 129.19, 128.70, 101.68, 83.58, 80.31, 76.05, 74.59, 74.48, 72.67, 71.80, 71.75, 61.85, 56.27, 56.10, 53.21; ESI-MS  $m/z$  calcd for C<sub>21</sub>H<sub>31</sub>NO<sub>11</sub>Na [M+Na]<sup>+</sup> 496.1789, found 496.4791.

**Methyl 2-*N*-sulfo-3-*O*-benzyl-4,6-di-*O*-sulfo-2-deoxy- $\alpha$ -D-glucopyranosyl-(1 $\rightarrow$ 4)-(methyl 2,3-di-*O*-sulfo- $\alpha$ -D-glucopyranosiduronate) (21)**

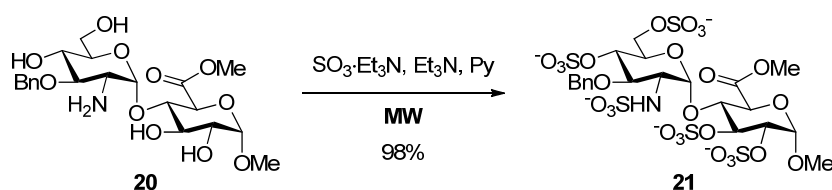

The general procedure for the microwave-assisted simultaneous *O,N*-sulfonation with SO<sub>3</sub>·NEt<sub>3</sub> was applied to provide compound **21** (20 mg, 98%) as a white solid:  $[\alpha]_D^{28} = 12.3$  ( $c$  0.6 H<sub>2</sub>O); <sup>1</sup>H NMR (400 MHz, D<sub>2</sub>O)  $\delta$  7.68–7.27 (m, 5H), 5.42 (d,  $J = 3.5$  Hz, 1H), 5.22 (d,  $J = 3.1$  Hz, 1H), 4.51 (d,  $J = 7.9$  Hz, 1H), 4.46 (dd,  $J = 8.7, 3.2$  Hz, 1H), 4.40–4.28 (m, 3H), 4.23 (dd,  $J = 10.9, 4.7$  Hz, 1H), 4.19–4.11 (m, 1H), 3.89–3.80 (m, 5H), 3.55 (d,  $J = 4.7$  Hz, 3H), 3.40 (dd,  $J = 10.7, 3.5$  Hz, 1H); <sup>13</sup>C

NMR (125 MHz, D<sub>2</sub>O)  $\delta$  170.33, 137.77, 129.13, 128.38, 128.03, 98.90, 97.17, 77.41, 77.15, 76.14, 75.15, 74.97, 73.79, 71.68, 69.49, 66.58, 57.44, 56.12, 55.46, 53.50; ESI-MS  $m/z$  calcd for C<sub>21</sub>H<sub>29</sub>NO<sub>26</sub>S<sub>5</sub> [M-2H]<sup>2-</sup> 435.5, found 435.8.

**4-Methoxyphenyl 2-amino-2-deoxy- $\alpha$ -D-glucopyranosyl-(1 $\rightarrow$ 4)-(methyl  $\alpha$ -L-iduropyranosiduronate) (22)**

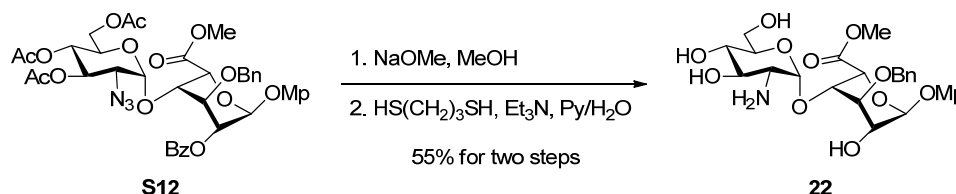

The general procedures for the deprotection of ester and the reduction of azide were applied to provide compound **22** (68 mg, 55%) as a light yellow solid:  $[\alpha]_D^{24} = +5.8$  ( $c$  0.4, MeOH); <sup>1</sup>H NMR (400 MHz, CD<sub>3</sub>OD)  $\delta$  7.56–7.17 (m, 5H), 7.03 (d,  $J = 9.0$  Hz, 2H), 6.84 (d,  $J = 9.0$  Hz, 2H), 5.47 (d,  $J = 2.3$  Hz, 1H), 5.02 (d,  $J = 3.4$  Hz, 1H), 4.73 (d,  $J = 11.6$  Hz, 1H), 4.22 (brs, 1H), 4.10–3.90 (m, 2H), 3.90–3.62 (m, 8H), 3.49–3.37 (m, 2H), 2.60 (dd,  $J = 10.0, 3.4$  Hz, 1H); <sup>13</sup>C NMR (100 MHz, CD<sub>3</sub>OD)  $\delta$  171.48, 156.59, 152.23, 139.58, 129.43, 128.87, 128.80, 118.95, 115.59, 101.76, 99.13, 75.77, 75.15, 74.64, 73.39, 73.34, 71.53, 69.95, 69.03, 62.41, 57.04, 56.02, 52.93; ESI-MS  $m/z$  calcd for C<sub>27</sub>H<sub>35</sub>NO<sub>12</sub>Na [M+Na]<sup>+</sup> 588.2052, found 588.2047.

**4-Methoxyphenyl 2-*N*-sulfo-3,4,6-tri-*O*-sulfo-2-deoxy- $\alpha$ -D-glucopyranosyl-(1 $\rightarrow$ 4)-(methyl 2-*O*-sulfo- $\alpha$ -L-iduropyranosiduronate) (23)**

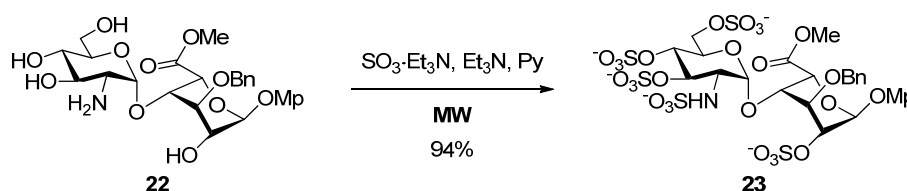

The general procedure for the microwave-assisted simultaneous *O,N*-sulfonation with  $\text{SO}_3 \cdot \text{NEt}_3$  was applied to provide compound **23** (20 mg, 94%) as a white solid:  $[\alpha]_D^{28} = 21.4$  ( $c$  0.2 H<sub>2</sub>O); <sup>1</sup>H NMR (400 MHz, D<sub>2</sub>O)  $\delta$  7.49–7.26 (m, 5H), 7.07–6.99 (m, 2H), 6.93–6.85 (m, 2H), 5.67 (d,  $J = 2.4$  Hz, 1H), 5.30 (d,  $J = 3.2$  Hz, 1H), 5.01 (d,  $J = 2.6$  Hz, 1H), 4.80 (dd,  $J = 26.5, 11.2$  Hz, 2H), 4.54 (dd,  $J = 4.5, 2.6$  Hz, 1H), 4.32–4.23 (m, 5H), 4.16 (dd,  $J = 11.0, 5.6$  Hz, 1H), 3.96–3.84 (m, 1H), 3.74 (d,  $J = 17.0$  Hz, 6H), 3.42 (dd,  $J = 10.6, 3.2$  Hz, 1H); <sup>13</sup>C NMR (100 MHz, D<sub>2</sub>O)  $\delta$  173.08,

157.52, 152.50, 139.80, 131.37, 131.00, 121.78, 117.75, 101.48, 99.79, 77.87, 77.69, 77.00, 76.64, 75.56, 75.48, 72.41, 71.31, 69.50, 59.30, 58.48, 55.87; ESI-MS  $m/z$  calcd for  $C_{27}H_{33}NO_{27}S_5$   $[M-2H]^{2-}$  481.5, found 481.7;  $C_{27}H_{32}NO_{27}S_5Na$   $[M+Na-2H]^{2-}$  492.5, found 492.7.

**Methyl (methyl 3,4-di-*O*-benzyl- $\alpha$ -L-iduopyranosyluronate)-(1 $\rightarrow$ 4)-(2-amino-3-*O*-benzyl-2-deoxy- $\alpha$ -D-glucopyranosyl)-(1 $\rightarrow$ 4)-(methyl 3-*O*-benzyl- $\alpha$ -L-iduopyranosyluronate)-(1 $\rightarrow$ 4)-2-amino-3-*O*-benzyl-2-deoxy- $\alpha$ -D-glucopyranoside (24)**

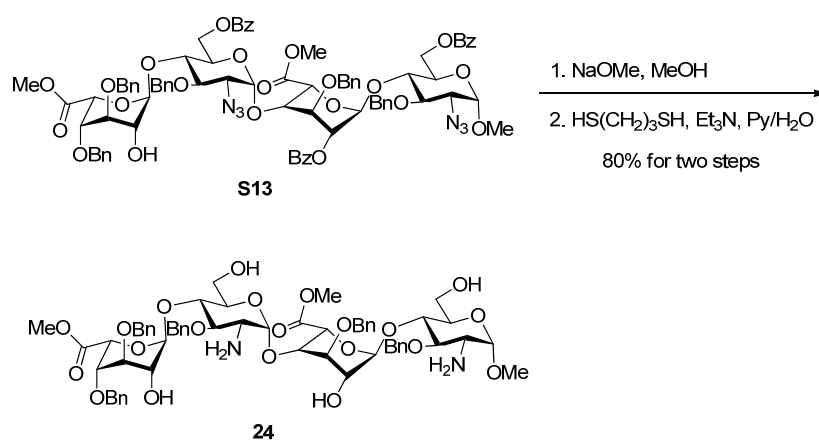

The general procedures for the deprotection of ester and the reduction of azide were applied to provide compound **24** (109 mg, 80%) as a light yellow solid:  $[\alpha]_D^{22} = 37.9$  ( $c$  0.8,  $CHCl_3$ );  $^1H$  NMR (400 MHz,  $CDCl_3$ )  $\delta$  7.50–7.00 (m, 25H), 5.27 (d,  $J = 6.1$  Hz, 2H), 4.99–4.80 (m, 4H), 4.74 (d,  $J = 9.6$  Hz, 1H), 4.72–4.66 (m, 2H), 4.66–4.35 (m, 7H), 4.18 (s, 1H), 3.99 (t,  $J = 9.5$  Hz, 1H), 3.93 (s, 1H), 3.89–3.71 (m, 7H), 3.71–3.59 (m, 3H), 3.53–3.28 (m, 10H), 2.87–2.72 (m, 3H);  $^{13}C$  NMR (100 MHz,  $CDCl_3$ )  $\delta$  170.09, 169.83, 138.69, 138.53, 137.58, 136.77, 128.61, 128.47, 128.45, 128.28, 128.18, 128.05, 128.02, 127.93, 127.85, 127.77, 127.41, 127.30, 127.04, 101.34, 100.98, 100.44, 96.97, 82.00, 81.76, 775.74, 75.32, 74.79, 74.74, 74.69, 74.08, 72.91, 72.78, 72.59, 72.13, 71.88, 71.25, 69.79, 69.23, 68.66, 68.22, 61.14, 61.04, 55.89, 55.22, 55.13, 51.85; ESI-MS  $m/z$  calcd for  $C_{62}H_{76}N_2O_{21}Na$   $[M+Na]^+$  1207.4833, found 1207.4867.

**Methyl (methyl 3,4-di-*O*-benzyl-2-*O*-sulfo- $\alpha$ -L-iduopyranosyluronate)-(1 $\rightarrow$ 4)-2-*N*-sulfo-3-*O*-benzyl-6-**

***O*-sulfo-2-deoxy- $\alpha$ -D-glucopyranosyl-(1 $\rightarrow$ 4)-(methyl 3-*O*-benzyl-2-*O*-sulfo- $\alpha$ -L-iduropyranosyluronate)-(1 $\rightarrow$ 4)-2-*N*-sulfo-3-*O*-benzyl-6-*O*-sulfo-2-deoxy- $\alpha$ -D-glucopyranoside (25)**

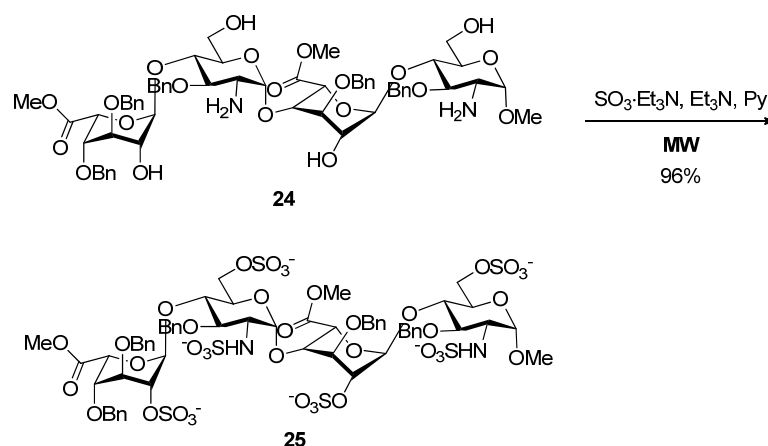

The general procedure for the microwave-assisted simultaneous *O,N*-sulfonation with  $\text{SO}_3 \cdot \text{NEt}_3$  was applied to provide compound **25** (43 mg, 96%) as a white solid:  $[\alpha]_D^{25} = 10.1$  (*c* 0.8, MeOH);  $^1\text{H}$  NMR (400 MHz,  $\text{CD}_3\text{OD}$ )  $\delta$  7.79–6.94 (m, 25H), 5.46 (s, 1H), 5.40 (s, 1H), 5.33 (brs, *J* = 8.4 Hz, 1H), 5.14–5.05 (m, 2H), 5.02 (s, 1H), 4.93 (d, *J* = 9.8 Hz, 2H), 4.84–4.75 (m, 2H), 4.67 (t, *J* = 4.7 Hz, 2H), 4.63–4.45 (m, 5H), 4.39–4.11 (m, 7H), 4.05 (s, 1H), 3.94 (t, *J* = 9.2 Hz, 2H), 3.83 (dd, *J* = 22.2, 9.8 Hz, 2H), 3.56–3.36 (m, 11H), 3.17 (s, 3H);  $^{13}\text{C}$  NMR (100 MHz,  $\text{CD}_3\text{OD}$ )  $\delta$  172.49, 172.06, 139.91, 139.51, 139.49, 138.86, 138.20, 130.15, 130.07, 129.97, 129.90, 129.72, 129.67, 129.32, 129.26, 129.04, 128.89, 128.84, 128.71, 128.24, 128.01, 100.79, 100.08, 99.17, 98.43, 79.92, 79.06, 76.88, 76.58, 76.08, 73.83, 73.64, 72.95, 72.34, 72.10, 71.48, 71.37, 71.12, 70.76, 70.63, 68.33, 68.23, 67.59, 67.43, 59.95, 59.87, 55.91, 53.02, 52.41, 49.85; ESI-MS *m/z* calcd for  $\text{C}_{62}\text{H}_{73}\text{N}_2\text{O}_{39}\text{S}_6$   $[\text{M}-3\text{H}]^{3-}$  553.7, found 554.1.

**Methyl (methyl 3,4-di-*O*-benzyl- $\beta$ -D-glucopyranosyluronate)-(1 $\rightarrow$ 4)-2-amino-3-*O*-benzyl-2-deoxy- $\alpha$ -D-glucopyranosyl-(1 $\rightarrow$ 4)-(methyl 2,3-di-*O*-benzyl- $\beta$ -D-glucopyranosyluronate)-(1 $\rightarrow$ 4)-2-amino-3-*O*-benzyl-2-deoxy- $\alpha$ -D-glucopyranoside (26)**

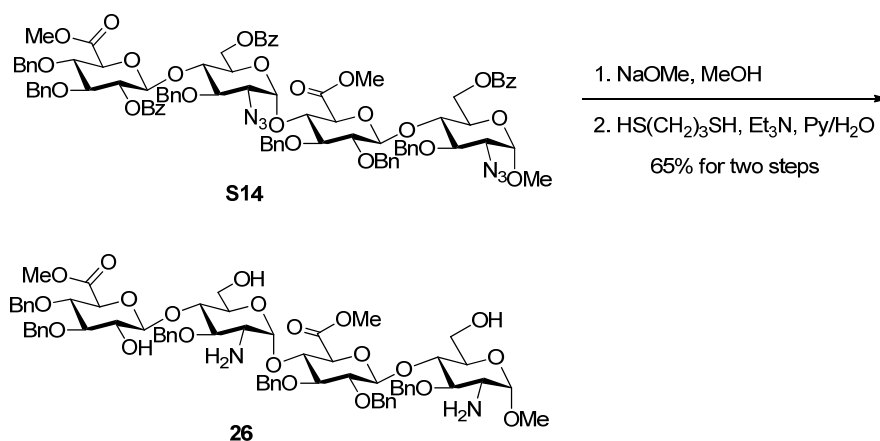

The general procedures for the deprotection of the ester and the reduction of the azide were applied to provide compound **26** (6 mg, 65%) as a light yellow solid:  $[\alpha]_D^{27} = 9.3$  ( $c$  0.4, MeOH);  $^1\text{H NMR}$  (400 MHz,  $\text{CDCl}_3$ )  $\delta$  7.53–7.12 (m, 30H), 5.26 (d,  $J = 3.7$  Hz, 1H), 5.14 (d,  $J = 11.2$  Hz, 1H), 5.02 (d,  $J = 11.1$  Hz, 1H), 4.96–4.67 (m, 7H), 4.56 (ddd,  $J = 25.6, 17.3, 9.3$  Hz, 4H), 4.13 (t,  $J = 8.7$  Hz, 1H), 4.04–3.64 (m, 9H), 3.64–3.39 (m, 13H), 3.35 (s, 3H), 2.78 (d,  $J = 6.2$  Hz, 4H), 2.69 (td,  $J = 10.4, 3.8$  Hz, 2H); ESI-MS  $m/z$  calcd for  $\text{C}_{69}\text{H}_{82}\text{N}_2\text{O}_{21}\text{Na}$   $[\text{M}+\text{Na}]^+$  1297.5302, found 1297.5306.

**Methyl (methyl 3,4-di-*O*-benzyl-2-*O*-sulfo- $\beta$ -D-glucopyranosyluronate)-(1 $\rightarrow$ 4)-2-*N*-sulfo-3-*O*-benzyl-6-*O*-sulfo-2-deoxy- $\alpha$ -D-glucopyranosyl-(1 $\rightarrow$ 4)-(methyl 2,3-di-*O*-benzyl- $\beta$ -D-glucopyranosyluronate)-(1 $\rightarrow$ 4)-2-*N*-sulfo-3-*O*-benzyl-6-*O*-sulfo-2-deoxy- $\alpha$ -D-glucopyranoside (**27**)**

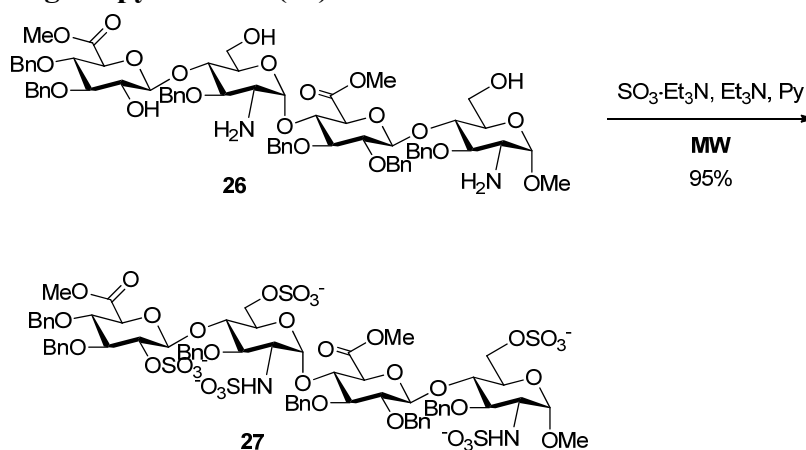

The general procedure for the microwave-assisted simultaneous *O,N*-sulfonation with  $\text{SO}_3\cdot\text{NEt}_3$  was applied to provide compound **27** (6 mg, 95%) as a white solid:  $[\alpha]_D^{25} = 26.4$  ( $c$  19.8, MeOH);  $^1\text{H NMR}$  (400 MHz,  $\text{CD}_3\text{OD}$ )  $\delta$  7.56–7.02 (m, 30H),

5.43 (d,  $J = 3.3$  Hz, 1H), 5.20 (d,  $J = 10.6$  Hz, 1H), 5.11–5.00 (m, 4H), 4.84–4.59 (m, 10H), 4.49 (t,  $J = 8.4$  Hz, 2H), 4.40 (d,  $J = 8.4$  Hz, 1H), 4.23–4.00 (m, 6H), 3.98–3.79 (m, 7H), 3.68 (s, 3H), 3.64–3.44 (m, 8H), 3.42–3.37 (m, 5H);  $^{13}\text{C}$  NMR (100 MHz,  $\text{CD}_3\text{OD}$ )  $\delta$  171.15, 170.70, 140.34, 140.10, 140.04, 139.93, 139.73, 139.53, 130.02, 129.99, 129.88, 129.79, 129.24, 129.20, 129.14, 129.10, 128.98, 128.69, 128.47, 128.44, 128.35, 128.07, 103.36, 102.31, 100.78, 99.92, 84.07, 82.45, 80.90, 80.37, 80.22, 79.00, 78.71, 77.89, 77.19, 76.38, 76.06, 75.85, 75.57, 75.38, 75.19, 75.11, 71.79, 70.46, 66.82, 59.17, 58.50, 55.87, 53.81, 52.75; ESI-MS  $m/z$  calcd for  $\text{C}_{69}\text{H}_{79}\text{N}_2\text{O}_{36}\text{S}_5$   $[\text{M}-3\text{H}]^{3-}$  557.1, found 557.6.

### Methyl (methyl

**3,4-di-*O*-benzyl-2-*O*-benzoyl- $\beta$ -D-glucopyranosyluronate)-(1 $\rightarrow$ 4)-2-*N*-sulfo-3-*O*-benzyl-6-*O*-sulfo-2-deoxy- $\alpha$ -D-glucopyranosyl-(1 $\rightarrow$ 4)-(methyl 3-*O*-benzyl-2-*O*-benzoyl- $\beta$ -D-glucopyranosyluronate)-(1 $\rightarrow$ 4)-2-*N*-sulfo-3-*O*-benzyl-6-*O*-sulfo-2-deoxy- $\alpha$ -D-glucopyranoside (3)**

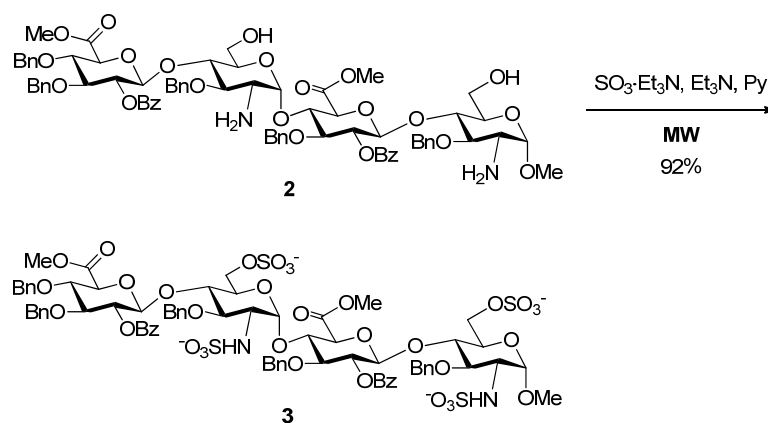

The general procedure for the microwave-assisted simultaneous *O,N*-sulfonation with  $\text{SO}_3 \cdot \text{NEt}_3$  was applied to provide compound **3** (50 mg, 92%) as a white solid:  $[\alpha]_{\text{D}}^{25} = 23.9$  ( $c$  2.4, MeOH);  $^1\text{H}$  NMR (500 MHz,  $\text{CD}_3\text{OD}$ )  $\delta$  8.29–8.20 (m, 2H), 8.17–8.06 (m, 2H), 7.71–6.96 (m, 30H), 5.55 (d,  $J = 3.3$  Hz, 1H), 5.29–5.22 (m, 2H), 5.21–5.15 (m, 1H), 5.07 (d,  $J = 8.1$  Hz, 1H), 4.97 (d,  $J = 3.5$  Hz, 1H), 4.94 (dd,  $J = 11.2, 2.3$  Hz, 2H), 4.86 (d,  $J = 10.6$  Hz, 1H), 4.80–4.70 (m, 4H), 4.61 (dd,  $J = 13.6, 11.0$  Hz, 3H), 4.50–4.39 (m, 2H), 4.33 (dd,  $J = 10.9, 2.3$  Hz, 1H), 4.22 (d,  $J = 9.8$  Hz, 1H), 4.10 (tt,  $J = 9.8, 6.5$  Hz, 4H), 4.01 (d,  $J = 9.6$  Hz, 1H), 3.98–3.93 (m, 1H), 3.93–3.80 (m, 3H), 3.56 (s, 3H), 3.50–3.41 (m, 3H), 3.39 (dd,  $J = 10.6, 3.4$  Hz, 1H),



3.31 (d,  $J = 1.8$  Hz, 3H), 3.22 (s, 3H);  $^{13}\text{C}$  NMR (125 MHz,  $\text{CD}_3\text{OD}$ )  $\delta$  170.59, 170.11, 166.75, 166.63, 139.88, 139.84, 139.42, 139.14, 139.08, 134.76, 134.57, 131.16, 131.10, 130.71, 130.58, 130.00, 129.95, 129.84, 129.75, 129.55, 129.25, 129.14, 129.12, 128.94, 128.90, 128.73, 128.67, 128.60, 128.37, 128.33, 128.29, 101.63, 101.55, 99.88, 99.23, 83.73, 82.54, 81.22, 78.81, 77.93, 77.58, 77.48, 76.70, 76.01, 75.77, 75.69, 75.53, 75.47, 75.27, 74.98, 71.38, 70.29, 66.16, 65.75, 58.66, 58.27, 55.75, 53.14, 52.91; ESI-MS  $m/z$  calcd for  $\text{C}_{76}\text{H}_{81}\text{N}_2\text{O}_{35}\text{S}_4$   $[\text{M}-3\text{H}]^{3-}$  569.8, found 570.3;  $m/z$  calcd for  $\text{C}_{76}\text{H}_{82}\text{N}_2\text{O}_{35}\text{S}_4$   $[\text{M}-2\text{H}]^{2-}$  855.2, found 855.7.

*General procedure for full deprotection of the corresponding per-O,N-sulfonated substrates. Method A (28-30).* Palladium hydroxide on carbon (Degussa type, 20%, 1.5~2.0 times the weight of the starting material) was added to a solution of the starting material in  $\text{CH}_3\text{OH}$  and  $\text{H}_2\text{O}$  (1 mL for 10~20 mg, v/v = 1/1). The mixture was placed under 10 atm atmosphere of hydrogen for 3 d at 30 °C. The mixture was filtered and concentrated. The residue was diluted with  $\text{H}_2\text{O}$  and immediately passed through a column of Dowex 50WX4  $\text{Na}^+$  resin using  $\text{H}_2\text{O}$  as eluent. The appropriate fraction was freeze dried to provide the final product as a white solid.

### d3-Methyl 2-deoxy-2-N-sulfo-6-O-sulfo- $\beta$ -D-glucopyranoside (28)

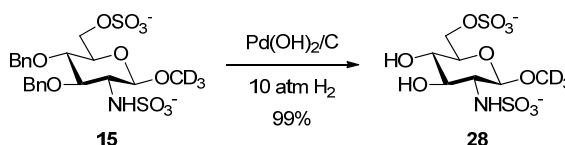

*Method A* was applied to provide compound **28** (15 mg, 99%) as a white solid:  $^1\text{H}$  NMR (400 MHz,  $\text{D}_2\text{O}$ )  $\delta$  8.45 (s, 1H), 4.48 (d,  $J = 8.4$  Hz, 1H), 4.35 (dd,  $J = 11.1$ , 2.0 Hz, 1H), 4.23 (dd,  $J = 11.2$ , 5.2 Hz, 1H), 3.73–3.59 (m, 2H), 3.57–3.44 (m, 1H), 3.02 (dd,  $J = 10.0$ , 8.4 Hz, 1H);  $^{13}\text{C}$  NMR (100 MHz,  $\text{D}_2\text{O}$ )  $\delta$  102.43, 74.45, 73.36, 69.46, 66.95, 59.77; ESI-MS  $m/z$  calcd for  $\text{C}_7\text{H}_{10}\text{D}_3\text{NO}_{11}\text{S}_2$   $[\text{M}-2\text{H}]^{2-}$  177.0, found 176.8.

### d3-Methyl 2-deoxy-2-N-sulfo-6-O-sulfo- $\alpha$ -D-glucopyranoside (29)

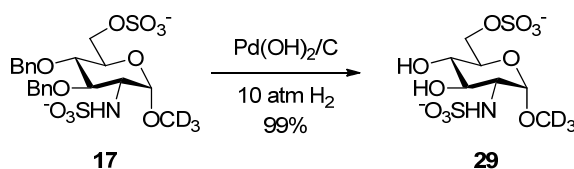

*Method A* was applied to provide compound **29** (21 mg, 99%) as a white solid:  $^1\text{H}$  NMR (400 MHz,  $\text{D}_2\text{O}$ )  $\delta$  4.98 (d,  $J = 3.5$  Hz, 1H), 4.28 (dd,  $J = 11.2, 2.0$  Hz, 1H), 4.21 (dd,  $J = 11.2, 5.0$  Hz, 1H), 3.88–3.78 (m, 1H), 3.52 (dt,  $J = 18.9, 9.2$  Hz, 2H), 3.22 (dd,  $J = 10.1, 3.6$  Hz, 1H);  $^{13}\text{C}$  NMR (100 MHz,  $\text{D}_2\text{O}$ )  $\delta$  98.35, 71.12, 69.54, 69.33, 67.00, 57.43; ESI-MS  $m/z$  calcd for  $\text{C}_7\text{H}_{10}\text{D}_3\text{NO}_{11}\text{S}_2$   $[\text{M}-2\text{H}]^{2-}$  177.0, found 176.8.

#### Methyl 2-deoxy-2-*N*-sulfo-6-*O*-sulfo- $\alpha$ -D-glucopyranose (**30**)

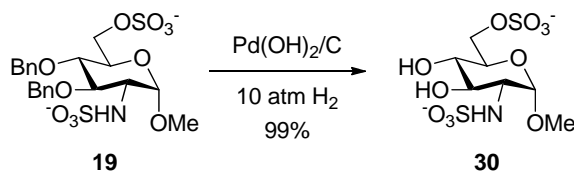

*Method A* was applied to provide compound **30** (23 mg, 99%) as a white solid:  $^1\text{H}$  NMR (400 MHz,  $\text{D}_2\text{O}$ )  $\delta$  5.03 (d,  $J = 3.6$  Hz, 1H), 4.33 (dd,  $J = 11.2, 2.1$  Hz, 1H), 4.26 (dd,  $J = 11.2, 5.1$  Hz, 1H), 3.88 (ddd,  $J = 9.7, 4.9, 2.0$  Hz, 1H), 3.64–3.48 (m, 2H), 3.43 (s, 3H), 3.28 (dd,  $J = 10.1, 3.6$  Hz, 1H);  $^{13}\text{C}$  NMR (100 MHz,  $\text{D}_2\text{O}$ )  $\delta$  98.50, 71.26, 69.62, 69.45, 67.09, 57.56, 55.42; ESI-MS  $m/z$  calcd for  $\text{C}_7\text{H}_{13}\text{NO}_{11}\text{S}_2$   $[\text{M}-\text{H}]^-$  352.0, found 351.9;  $[\text{M}-2\text{H}]^{2-}$  175.5, found 175.3.

*General procedure for full deprotection of the corresponding per-O,N-sulfonated substrates. Method B (31-34).* A premixed solution of 30% solution of  $\text{H}_2\text{O}_2$  in water (100 equiv per  $\text{CO}_2\text{Me}$ ) and 1 M LiOH (50 equiv per  $\text{CO}_2\text{Me}$ ) was added to a solution of the starting material in THF (0.02 M) at 0 °C. The mixture was stirred at 0 °C for 24 h. The mixture was then brought to pH = 8~8.5 by addition of acidic resin, and was then filtered. The filtrate was concentrated *in vacuum* (bath temperature 20~30 °C). The residue was dissolved in  $\text{CH}_2\text{Cl}_2/\text{MeOH}$  (v/v = 1/1). The resulting solution was layered on the top of a Sephadex LH-20 chromatography column and was then eluted

with CH<sub>2</sub>Cl<sub>2</sub>/MeOH (v/v = 1/1). The appropriate fraction was concentrated *in vacuo* to provide the product.

Palladium hydroxide on carbon (Degussa type, 20%, 1.5~2.0 times the weight of the starting material) was added to a solution of the starting material in CH<sub>3</sub>OH and pH = 7 Buffer H<sub>2</sub>O (1 mL for 10~20 mg, v/v = 1/1). The mixture was placed under an atmosphere of hydrogen for 24 h. The mixture was filtered and concentrated. The residue was diluted with H<sub>2</sub>O. The solution was layered on the top of a Sephadex G-10 column that was eluted with H<sub>2</sub>O. The fractions containing product were concentrated *in vacuo*. The residue was immediately passed through a column of Dowex 50WX4 Na<sup>+</sup> resin using H<sub>2</sub>O as eluent. The appropriate fraction was freeze dried to provide the final product as a white solid.

**4-Methoxyphenyl 2-*N*-sulfo-4-*O*-sulfo-2-deoxy- $\alpha$ -D-glucopyranosyl-(1 $\rightarrow$ 4)-2-*O*-sulfo- $\alpha$ -L-iduropyranosiduronate (31)**

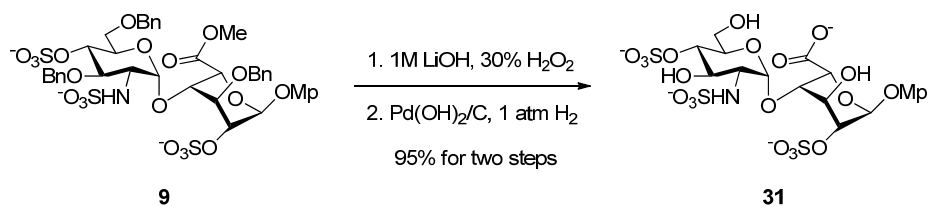

*Method B* was applied to provide compound **31** (7 mg, 95%) as a white solid: <sup>1</sup>H NMR (400 MHz, D<sub>2</sub>O)  $\delta$  7.63–6.91 (m, 20H), 5.48 (d,  $J$  = 3.7 Hz, 1H), 4.94 (t,  $J$  = 11.2 Hz, 2H), 4.90–4.80 (m, 4H), 4.78 (dd,  $J$  = 7.1, 3.5 Hz, 2H), 4.67 (dd,  $J$  = 15.5, 9.3 Hz, 2H), 4.10–3.59 (m, 14H), 3.53 (t,  $J$  = 9.4 Hz, 1H), 3.45–3.18 (m, 6H); <sup>13</sup>C NMR (100 MHz, D<sub>2</sub>O)  $\delta$  174.53, 154.90, 150.37, 129.27, 125.44, 119.68, 115.18, 99.21, 97.03, 77.18, 76.10, 75.61, 70.26, 69.62, 69.07, 68.51, 60.22, 57.96, 55.92; ESI-MS  $m/z$  calcd for C<sub>19</sub>H<sub>25</sub>NO<sub>21</sub>S<sub>3</sub> [M-2H]<sup>2-</sup> 349.5, found 349.6.

**Methyl 2-*N*-sulfo-6-*O*-sulfo-2-deoxy- $\alpha$ -D-glucopyranosyl-(1 $\rightarrow$ 4)-2-*O*-sulfo- $\beta$ -D-glucopyranosyluronate-(1 $\rightarrow$ 4)-2-*N*-sulfo-6-*O*-sulfo-2-deoxy- $\alpha$ -D-glucopyranoside (32)**

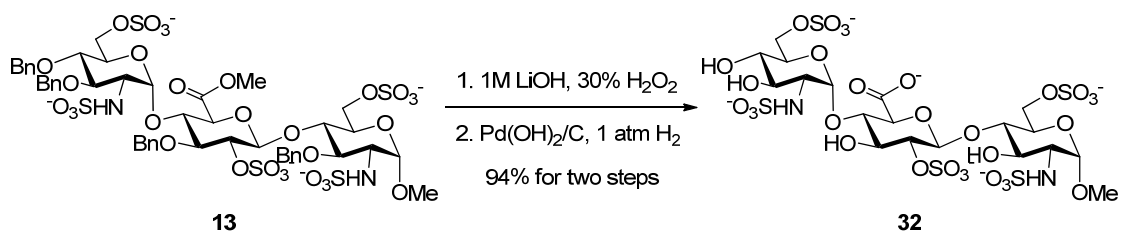

*Method B* was applied to provide compound **32** (11 mg, 94%) as a white solid:  $[\alpha]_{\text{D}}^{28} = 23.9$  (*c* 0.3, H<sub>2</sub>O); <sup>1</sup>H NMR (400 MHz, D<sub>2</sub>O)  $\delta$  5.69 (d, 1 H, *J* = 2.4 Hz), 5.07 (d, 1 H, *J* = 2.8 Hz), 4.62 (d, 1 H, *J* = 10.0 Hz), 4.40 (d, 1 H, *J* = 10.4 Hz), 4.29 (d, 1 H, *J* = 11.2 Hz), 4.23–4.15 (m, 2 H), 4.04–3.60 (m, 9 H), 3.46 (s, 3 H), 3.33–3.27 (m, 2 H); <sup>13</sup>C NMR (100 MHz, D<sub>2</sub>O)  $\delta$  100.07, 98.31, 97.82, 79.93, 77.91, 76.47, 75.05, 71.30, 69.95, 69.48, 69.08, 68.10, 66.39, 65.97, 57.94, 57.26, 55.51; ESI-MS *m/z* calcd for C<sub>19</sub>H<sub>31</sub>N<sub>2</sub>O<sub>30</sub>S<sub>5</sub> [M-3H]<sup>3-</sup> 309.0, found 309.2; *m/z* calcd for C<sub>19</sub>H<sub>32</sub>N<sub>2</sub>O<sub>30</sub>S<sub>5</sub> [M-2H]<sup>2-</sup> 464.0, found 464.2.

### Methyl

#### 2-*O*-sulfo- $\alpha$ -L-iduropyranosyluronate-(1 $\rightarrow$ 4)-2-*N*-sulfo-6-*O*-sulfo-2-deoxy- $\alpha$ -D-glucopyranosyl-(1 $\rightarrow$ 4)-2-*O*-sulfo- $\alpha$ -L-iduropyranosyluronate-(1 $\rightarrow$ 4)-2-*N*-sulfo-6-*O*-sulfo-2-deoxy- $\alpha$ -D-glucopyranoside (**33**)

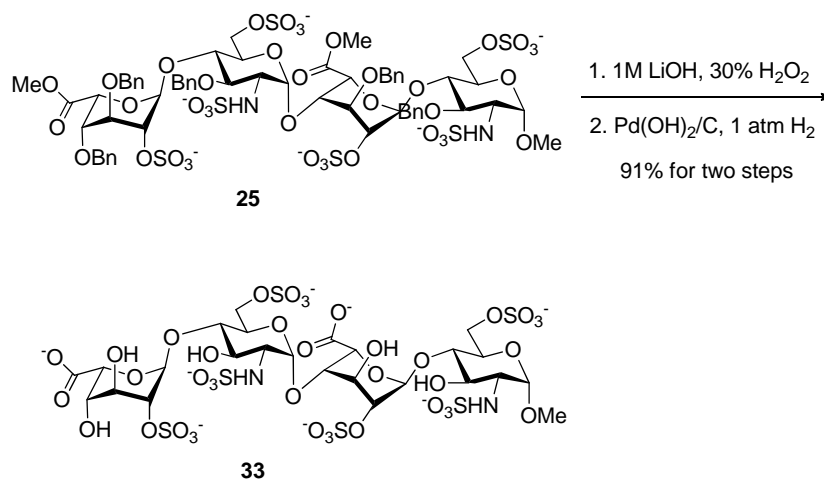

*Method B* was applied to provide compound **33** (20 mg, 91%) as a white solid:  $[\alpha]_{\text{D}}^{28} = 13.8$  (*c* 0.8, H<sub>2</sub>O); <sup>1</sup>H NMR (400 MHz, D<sub>2</sub>O)  $\delta$  5.44 (d, *J* = 3.5 Hz, 1H), 5.23 (d, *J* = 3.2 Hz, 1H), 5.19 (s, 1H), 5.04 (d, *J* = 3.6 Hz, 1H), 4.87 (d, *J* = 2.3 Hz, 1H), 4.41–4.24 (m, 7H), 4.20 (dd, *J* = 6.3, 3.8 Hz, 1H), 4.13 (d, *J* = 3.7 Hz, 2H), 4.07 (d, *J* = 9.7 Hz, 1H), 4.03–3.95 (m, 2H), 3.83–3.62 (m, 4H), 3.44 (s, 3H), 3.29 (dt, *J* = 10.2,

3.7 Hz, 2H);  $^{13}\text{C}$  NMR (100 MHz,  $\text{D}_2\text{O}$ )  $\delta$  176.38, 174.53, 99.47, 99.19, 98.32, 96.51, 77.09, 76.48, 76.04, 74.16, 69.98, 69.72, 69.21, 68.98, 68.62, 67.00, 58.08, 57.80, 55.50; ESI-MS  $m/z$  calcd for  $\text{C}_{25}\text{H}_{42}\text{N}_2\text{O}_{39}\text{S}_6$   $[\text{M}-3\text{H}]^{3-}$  394.3, found 394.6.

### Methyl

#### 2-*O*-sulfo- $\beta$ -D-glucopyranosyluronate-(1 $\rightarrow$ 4)-2-*N*-sulfo-6-*O*-sulfo-2-deoxy- $\alpha$ -D-glucopyranosyl-(1 $\rightarrow$ 4)- $\beta$ -D-glucopyranosyluronate-(1 $\rightarrow$ 4)-2-*N*-sulfo-6-*O*-sulfo-2-deoxy- $\alpha$ -D-glucopyranoside (**34**)

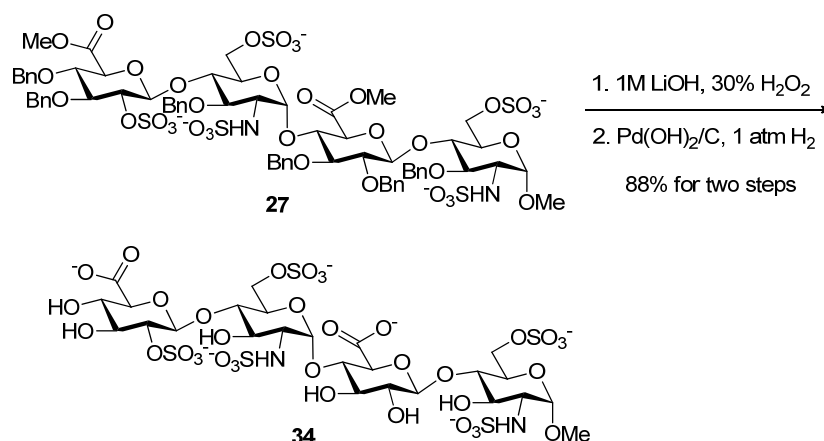

*Method B* was applied to provide compound **34** (16 mg, 88%) as a white solid:  $[\alpha]_{\text{D}}^{28} = 21.4$  ( $c$  0.2,  $\text{H}_2\text{O}$ );  $^1\text{H}$  NMR (400 MHz,  $\text{D}_2\text{O}$ )  $\delta$  5.52 (d, 1 H,  $J = 3.6$  Hz), 5.05 (d, 1 H,  $J = 3.2$  Hz), 4.79 (d, 1 H), 4.60 (d, 1 H,  $J = 8.0$  Hz), 4.56 (d, 1 H,  $J = 10.8$  Hz), 4.42 (d, 1 H,  $J = 10.8$  Hz), 4.33 (dd, 1 H,  $J = 11.2$  Hz, 3.6 Hz), 4.20 (d, 1 H,  $J = 10.8$  Hz), 4.12 (t, 1 H,  $J = 8.8$  Hz), 4.03–4.01 (m, 2 H), 3.88–3.68 (m, 9 H), 3.60 (t, 1 H,  $J = 9.6$  Hz), 3.44 (s, 3 H), 3.42–3.31 (m, 3 H);  $^{13}\text{C}$  NMR (100 MHz,  $\text{D}_2\text{O}$ )  $\delta$  181.53, 175.60, 102.23, 100.81, 99.84, 98.21, 79.70, 78.81, 78.67, 77.58, 76.63, 75.74, 75.68, 74.48, 72.96, 71.74, 69.70, 69.36, 69.01, 68.25, 66.62, 65.87, 57.86, 57.24, 55.50; ESI-MS  $m/z$  calcd for  $\text{C}_{25}\text{H}_{39}\text{N}_2\text{O}_{36}\text{S}_5$   $[\text{M}-3\text{H}^+]^{3-}$  367.7, found 367.5.

*General procedure for full deprotection of the corresponding per-*O,N*-sulfonated substrates. Method C (35).* A premixed solution of 30% solution of  $\text{H}_2\text{O}_2$  in water (100 equiv per  $\text{CO}_2\text{Me}$ ) and 1 M LiOH (50 equiv per  $\text{CO}_2\text{Me}$ ) were added to a solution of the starting material in THF (0.02 M). The mixture was stirred at rt for 24 h. A solution of KOH (3 M) was added until pH = ~14. The mixture was left stirring for 24 h at room temperature. The mixture was then brought to pH = 8~8.5 by

addition of acidic resin, and was then filtered. The filtrate was concentrated *in vacuo* (bath temperature 20~30 °C). The residue was dissolved in CH<sub>2</sub>Cl<sub>2</sub>/MeOH (v/v = 1/1). The resulting solution was layered on the top of a Sephadex LH-20 chromatography column and was then eluted with CH<sub>2</sub>Cl<sub>2</sub>/MeOH (v/v = 1/1). The appropriate fraction was concentrated *in vacuo* to provide the pure product.

Palladium hydroxide on carbon (Degussa type, 20%, 1.5~2.0 times the weight of the starting material) was added to a solution of the starting material in CH<sub>3</sub>OH and pH = 7 Buffer H<sub>2</sub>O (1 mL for 10~20 mg, v/v = 1/1). The mixture was placed under an atmosphere of hydrogen for 24 h. The mixture was filtered and concentrated. The residue was diluted with H<sub>2</sub>O. The solution was layered on the top of a Sephadex G-10 column that was eluted with H<sub>2</sub>O. The fractions containing product were concentrated *in vacuo*. The residue was immediately passed through a column of Dowex 50WX4 Na<sup>+</sup> resin using H<sub>2</sub>O as eluent. The appropriate fraction was freeze dried to provide the final product as a white solid.

**Methyl  $\beta$ -D-glucopyranosyluronate-(1 $\rightarrow$ 4)-2-N-sulfo-6-O-sulfo-2-deoxy- $\alpha$ -D-glucopyranosyl-(1 $\rightarrow$ 4)- $\beta$ -D-glucopyranosyluronate-(1 $\rightarrow$ 4)-2-N-sulfo-6-O-sulfo-2-deoxy- $\alpha$ -D-glucopyranoside (35)**

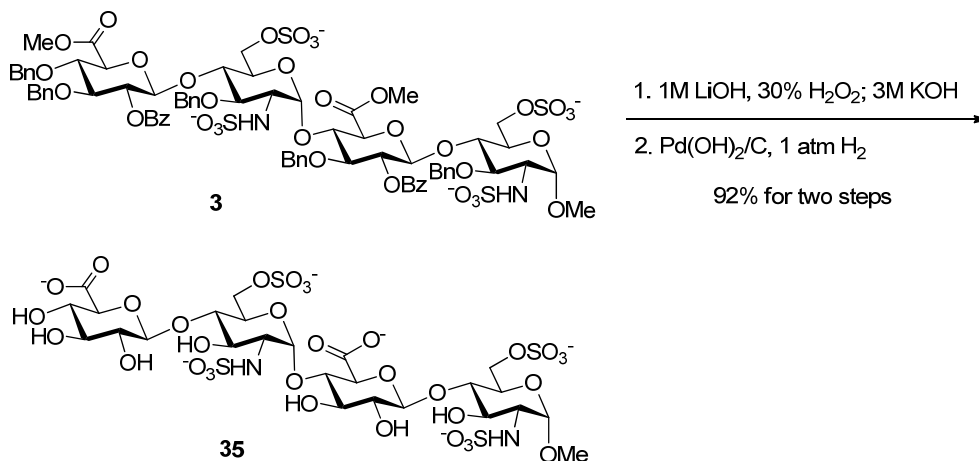

*Method B* was applied to provide compound **35** (36 mg, 92%) as a white solid:  $[\alpha]_D^{28} = 21.0$  (*c* 0.1, H<sub>2</sub>O); <sup>1</sup>H NMR (400 MHz, D<sub>2</sub>O)  $\delta$  5.66 (d, *J* = 3.5 Hz, 1H), 5.05 (d, *J* = 3.5 Hz, 2H), 4.60 (d, *J* = 7.8 Hz, 3H), 4.48 (d, *J* = 10.0 Hz, 1H), 4.41 (d, *J* = 10.0 Hz, 1H), 4.33 (dd, *J* = 11.1, 4.9 Hz, 1H), 4.19 (d, *J* = 10.8 Hz, 1H), 4.03 (d, *J* = 9.7 Hz, 2H), 3.91–3.63 (m, 9H), 3.60–3.25 (m, 10H); <sup>13</sup>C NMR (100 MHz, D<sub>2</sub>O)  $\delta$

175.73, 174.87, 101.90, 101.71, 98.14, 97.03, 78.14, 76.86, 76.25, 76.19, 75.99, 75.65, 74.98, 72.86, 72.80, 71.79, 69.53, 69.34, 68.55, 68.08, 66.30, 65.70, 57.45, 57.13, 55.45; ESI-MS  $m/z$  calcd for  $C_{25}H_{39}N_2O_{33}S_4Na$   $[M+Na-3H]^{2-}$  523.1, found 523.6.

#### 4-Methoxyphenyl

#### 2-*N*-acetyl-3,6-di-*O*-benzyl-4-*O*-sulfo-2-deoxy- $\alpha$ -D-glucopyranosyl-(1 $\rightarrow$ 4)- (methyl 3-*O*-benzyl-2-*O*-sulfo- $\beta$ -D-glucopyranosiduronate) (**36**)

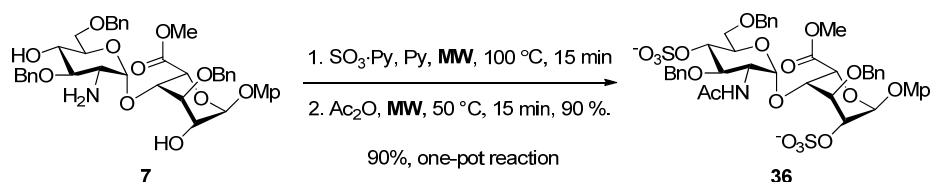

*General Procedure for the microwave-assisted simultaneous O-sulfonation and N-acetylation.* Sulfur trioxide pyridine complex (3 equiv per OH) was added to a solution of the starting material in pyridine (1.0 mL for 30 mg starting material). The mixture was stirred at room temperature for 5 min, then subjected to microwave radiation for 15 min at a fix temperature of  $100\text{ }^\circ C$  (average power of 18 W). Acetic anhydride (2 equiv per  $NH_2$ ) was added, the mixture was then subjected to microwave radiation for another 15 min at a fix temperature of  $50\text{ }^\circ C$ . After the addition of  $CH_3OH$  (0.5 mL) and trimethylamine (1 mL), stirring was continued for 15 min. The mixture was concentrated in vacuum. The residue was applied to a small RP-18 silica gel column, which was eluted with a stepwise gradient of  $H_2O$  and  $CH_3OH$  (from v/v = 1/0, to 1/9, to 1/2). The fractions containing the product were concentrated in vacuum. The residue was immediately passed through a column of Dowex 50WX4  $Na^+$  resin using  $CH_3OH$  as eluent. The fractions containing the product were concentrated in vacuum to provide the product as sodium salt.

*The general procedure for the microwave-assisted simultaneous O-sulfonation and N-acetylation* was applied to provide compound **36** (7 mg, 90%) as a white solid:  $[\alpha]_D^{27} = 14.4$  ( $c$  0.7, MeOH);  $^1H$  NMR (400 MHz,  $CD_3OD$ )  $\delta$  7.55 (d,  $J = 9.6$  Hz, 1H), 7.43–7.14 (m, 14H), 7.04 (d,  $J = 9.1$  Hz, 2H), 6.86 (d,  $J = 9.1$  Hz, 2H), 5.82 (s, 1H), 5.12 (d,  $J = 10.7$  Hz, 1H), 5.00 (s, 2H), 4.81 (d,  $J = 11.9$  Hz, 2H), 4.72–4.51 (m, 5H), 4.39 (t,  $J = 9.3$  Hz, 1H), 4.26 (s, 2H), 4.21–4.12 (m, 1H), 4.05 (d,  $J = 9.2$  Hz, 1H),

3.77 (d,  $J = 10.0$  Hz, 7H), 3.71–3.62 (m, 1H);  $^{13}\text{C}$  NMR (125 MHz,  $\text{CD}_3\text{OD}$ )  $\delta$  174.01, 171.27, 156.72, 151.79, 140.20, 139.90, 139.07, 129.62, 129.38, 129.24, 129.06, 128.92, 128.77, 128.43, 128.37, 119.11, 115.68, 99.76, 96.03, 80.55, 78.38, 76.49, 74.35, 72.88, 72.42, 71.45, 71.00, 70.87, 70.55, 68.43, 56.04, 53.62, 53.14, 23.36; ESI-MS  $m/z$  calcd for  $\text{C}_{43}\text{H}_{47}\text{NO}_{19}\text{S}_2$   $[\text{M}-2\text{H}]^{2-}$  472.6, found 473.6.

**4-Methoxyphenyl 2-*N*-acetyl-4-*O*-sulfo-2-deoxy- $\alpha$ -D-glucopyranosyl-(1 $\rightarrow$ 4)-2-*O*-sulfo- $\alpha$ -L-iduropyranosiduronate (37)**

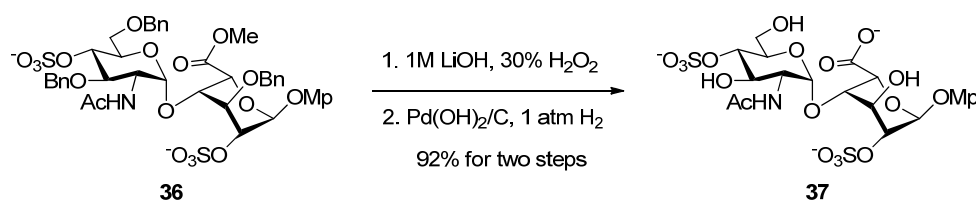

*Method B* was applied to provide compound **37** (5 mg, 92%) as a white solid:  $^1\text{H}$  NMR (400 MHz,  $\text{D}_2\text{O}$ )  $\delta$  7.17 (d,  $J = 9.1$  Hz, 2H), 7.00 (d,  $J = 9.1$  Hz, 2H), 5.70 (s, 1H), 5.18 (d,  $J = 3.5$  Hz, 1H), 4.49 (s, 1H), 4.39 (s, 1H), 4.26 (t,  $J = 9.3$  Hz, 1H), 4.16–4.04 (m, 2H), 3.97–3.77 (m, 7H), 2.08 (s, 3H);  $^{13}\text{C}$  NMR (100 MHz,  $\text{D}_2\text{O}$ )  $\delta$  174.66, 154.74, 149.96, 119.49, 114.96, 98.72, 93.32, 76.73, 73.43, 70.68, 70.17, 69.71, 67.50, 63.63, 59.99, 55.66, 52.98, 22.11; ESI-MS  $m/z$  calcd for  $\text{C}_{21}\text{H}_{27}\text{NO}_{19}\text{S}_2$   $[\text{M}-2\text{H}]^{2-}$  330.5, found 330.8.

**References for known compounds:**

- Compounds **1**, **S5**, **S10**, **S13**, **S14**: P. Xu, W. Xu, Y. Dai, Y. Yang and B. Yu, *Org. Chem. Front.*, **2014**, *1*, 405-414.
- Compounds **S11**, **S12**: J. Li, Y. Dai, W. Li, S. Laval, P. Xu, and B. Yu, *Asian J. Org. Chem.*, **2015**, *4*, 756-762.
- Compound **S1**: M. Martin-Lomas, N. Khair, S. Garcia, J. Koessler, P. M. Nieto, T. W. Rademacher, *Chem. Eur. J.*, **2000**, *6*, 3608-3621.
- Compound **S7**: P. Traar, F. Belaj, K. A. Francesconi, *Aust. J. Chem.*, **2004**, *57*, 1051-1053.



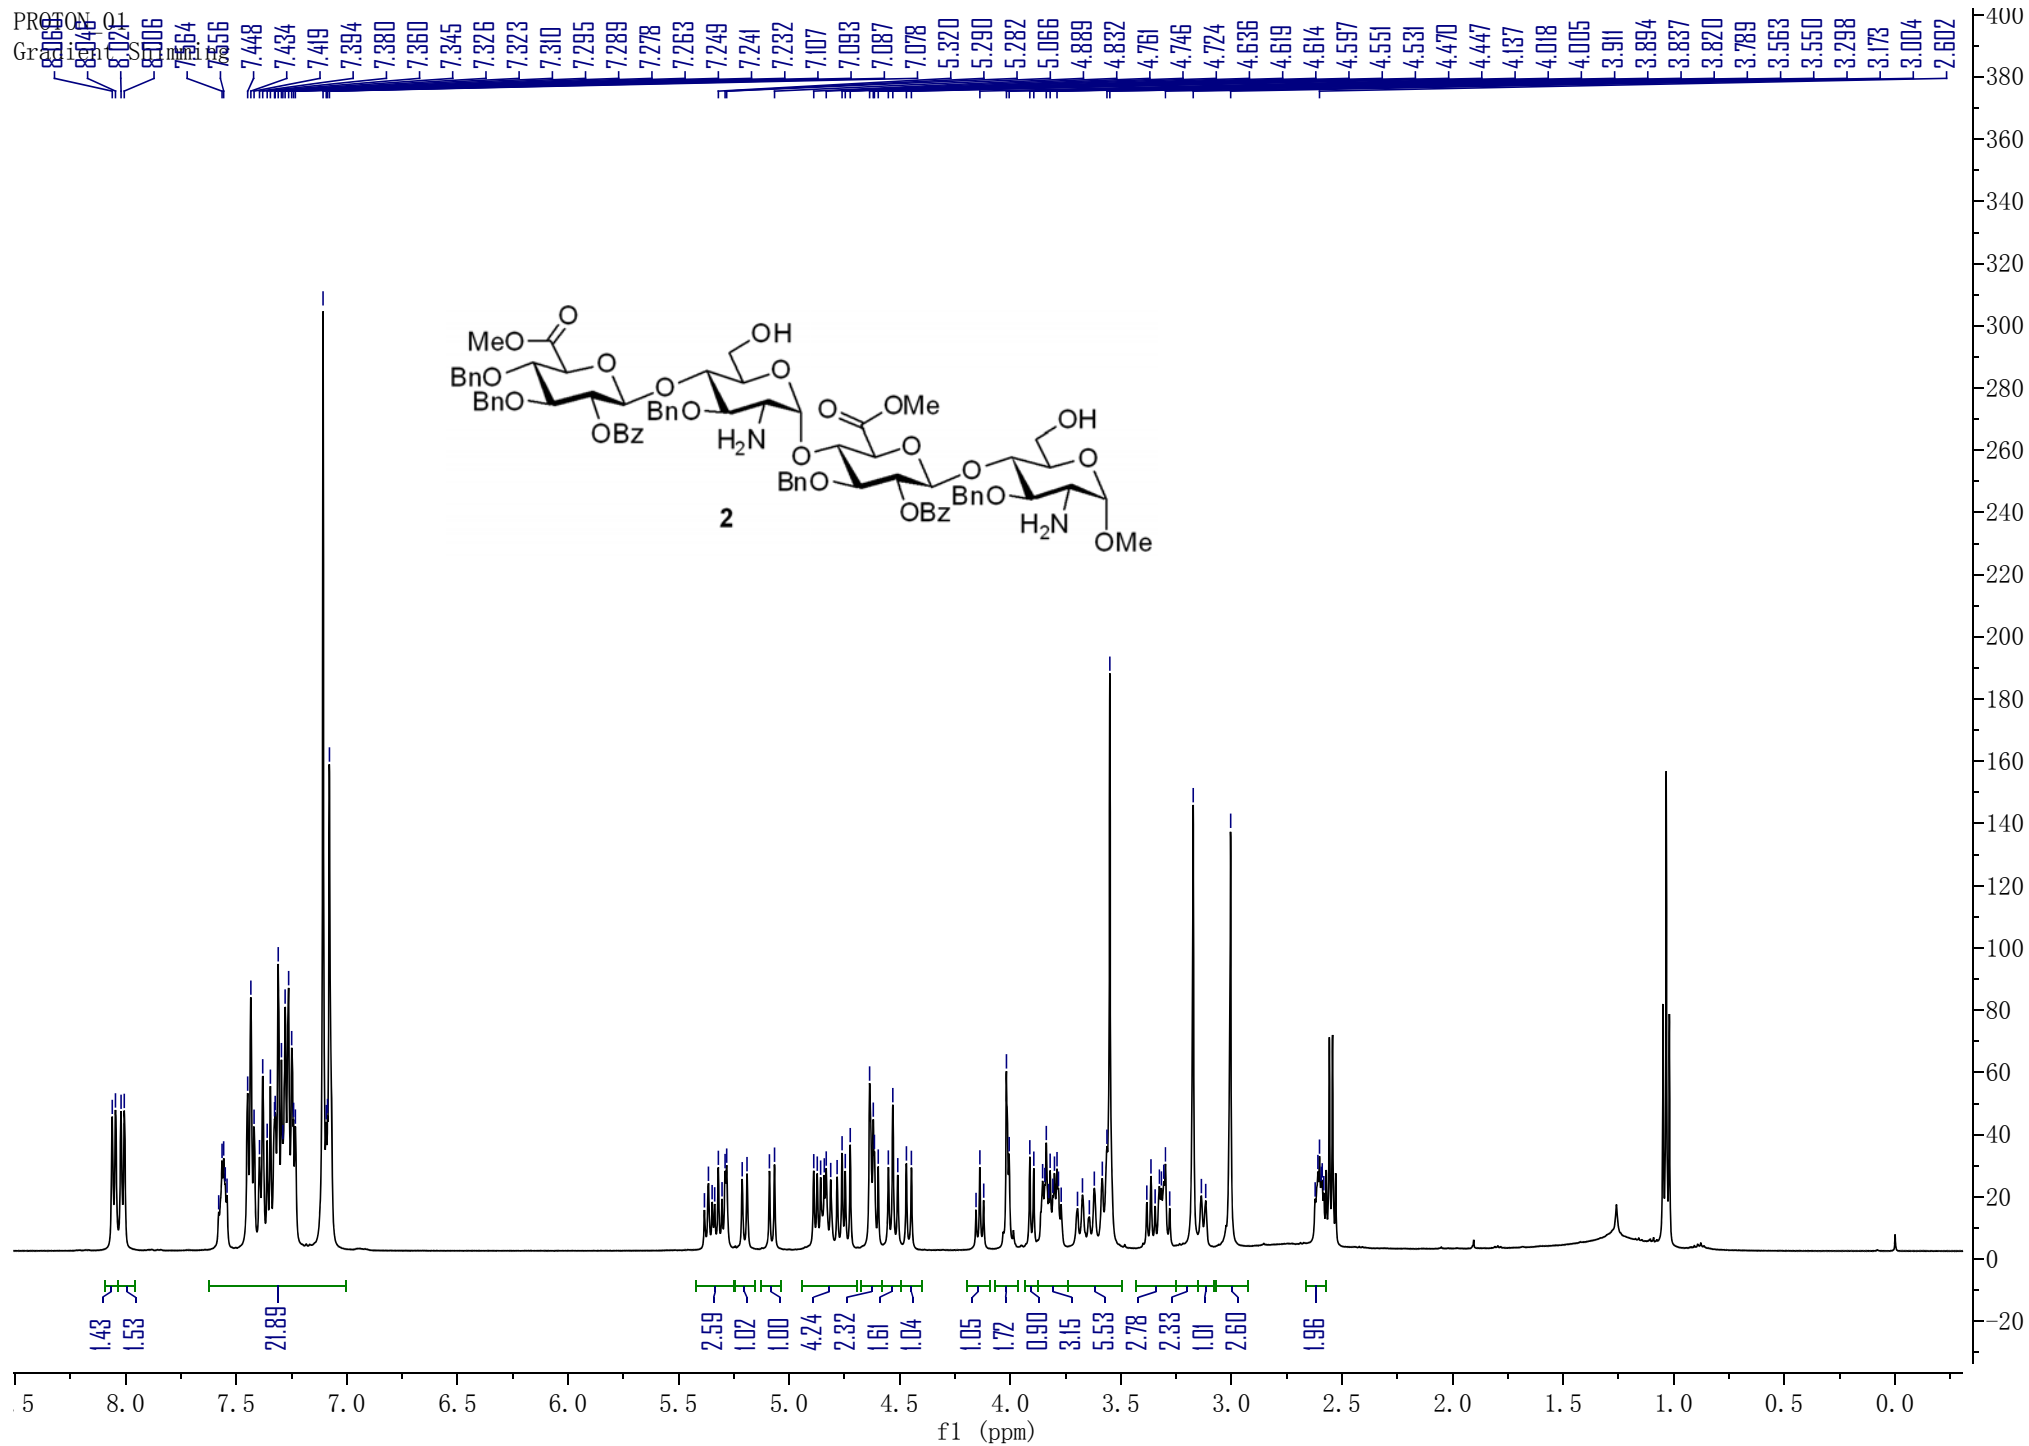

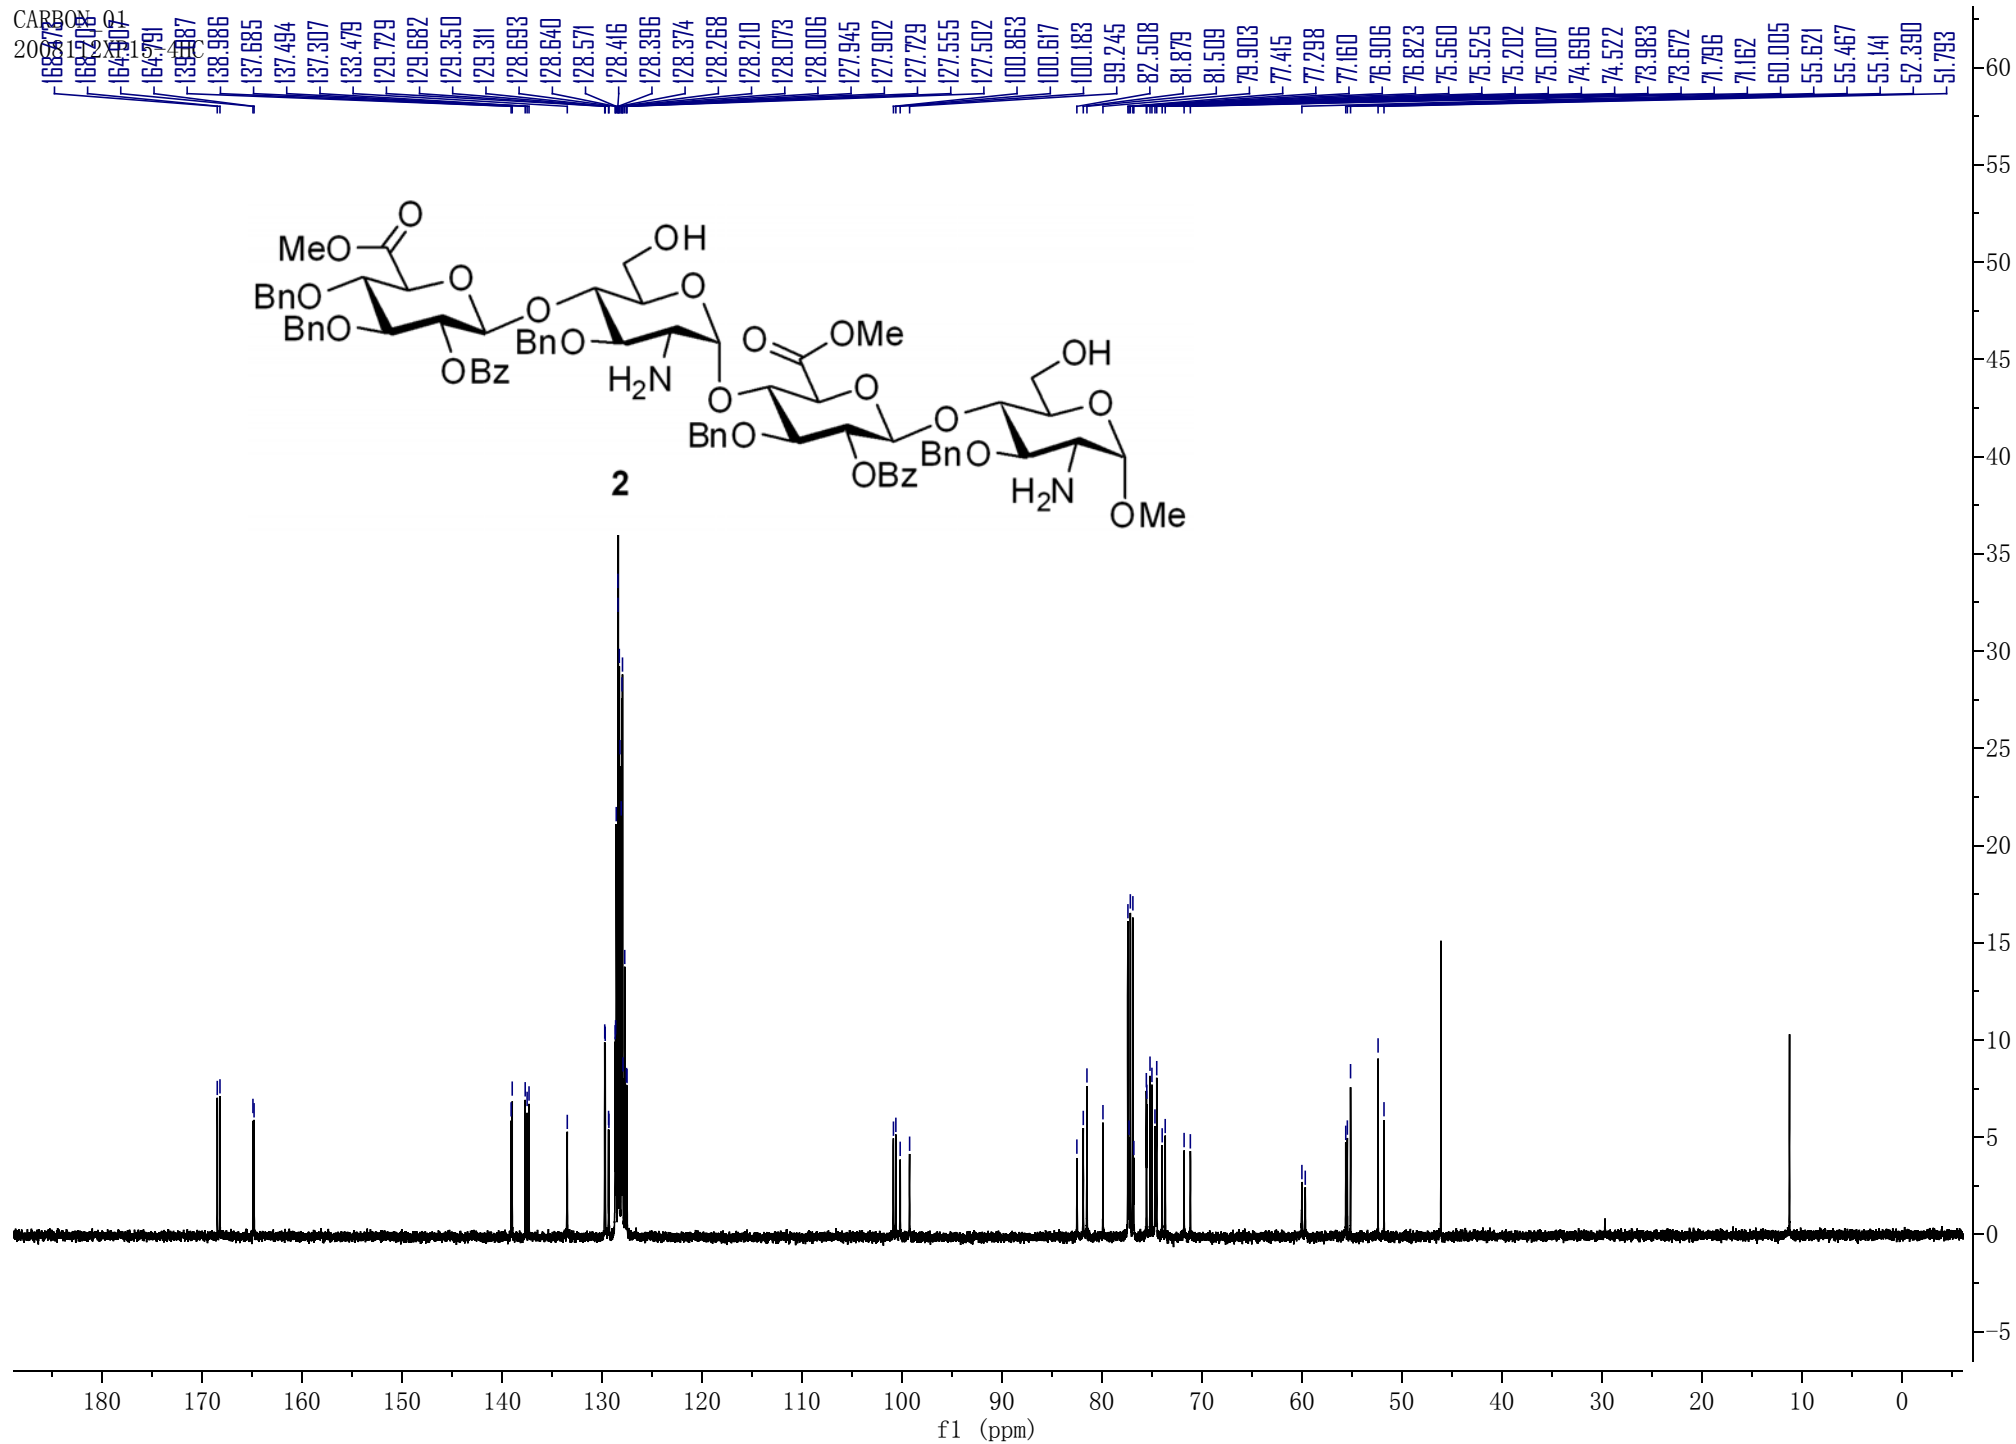

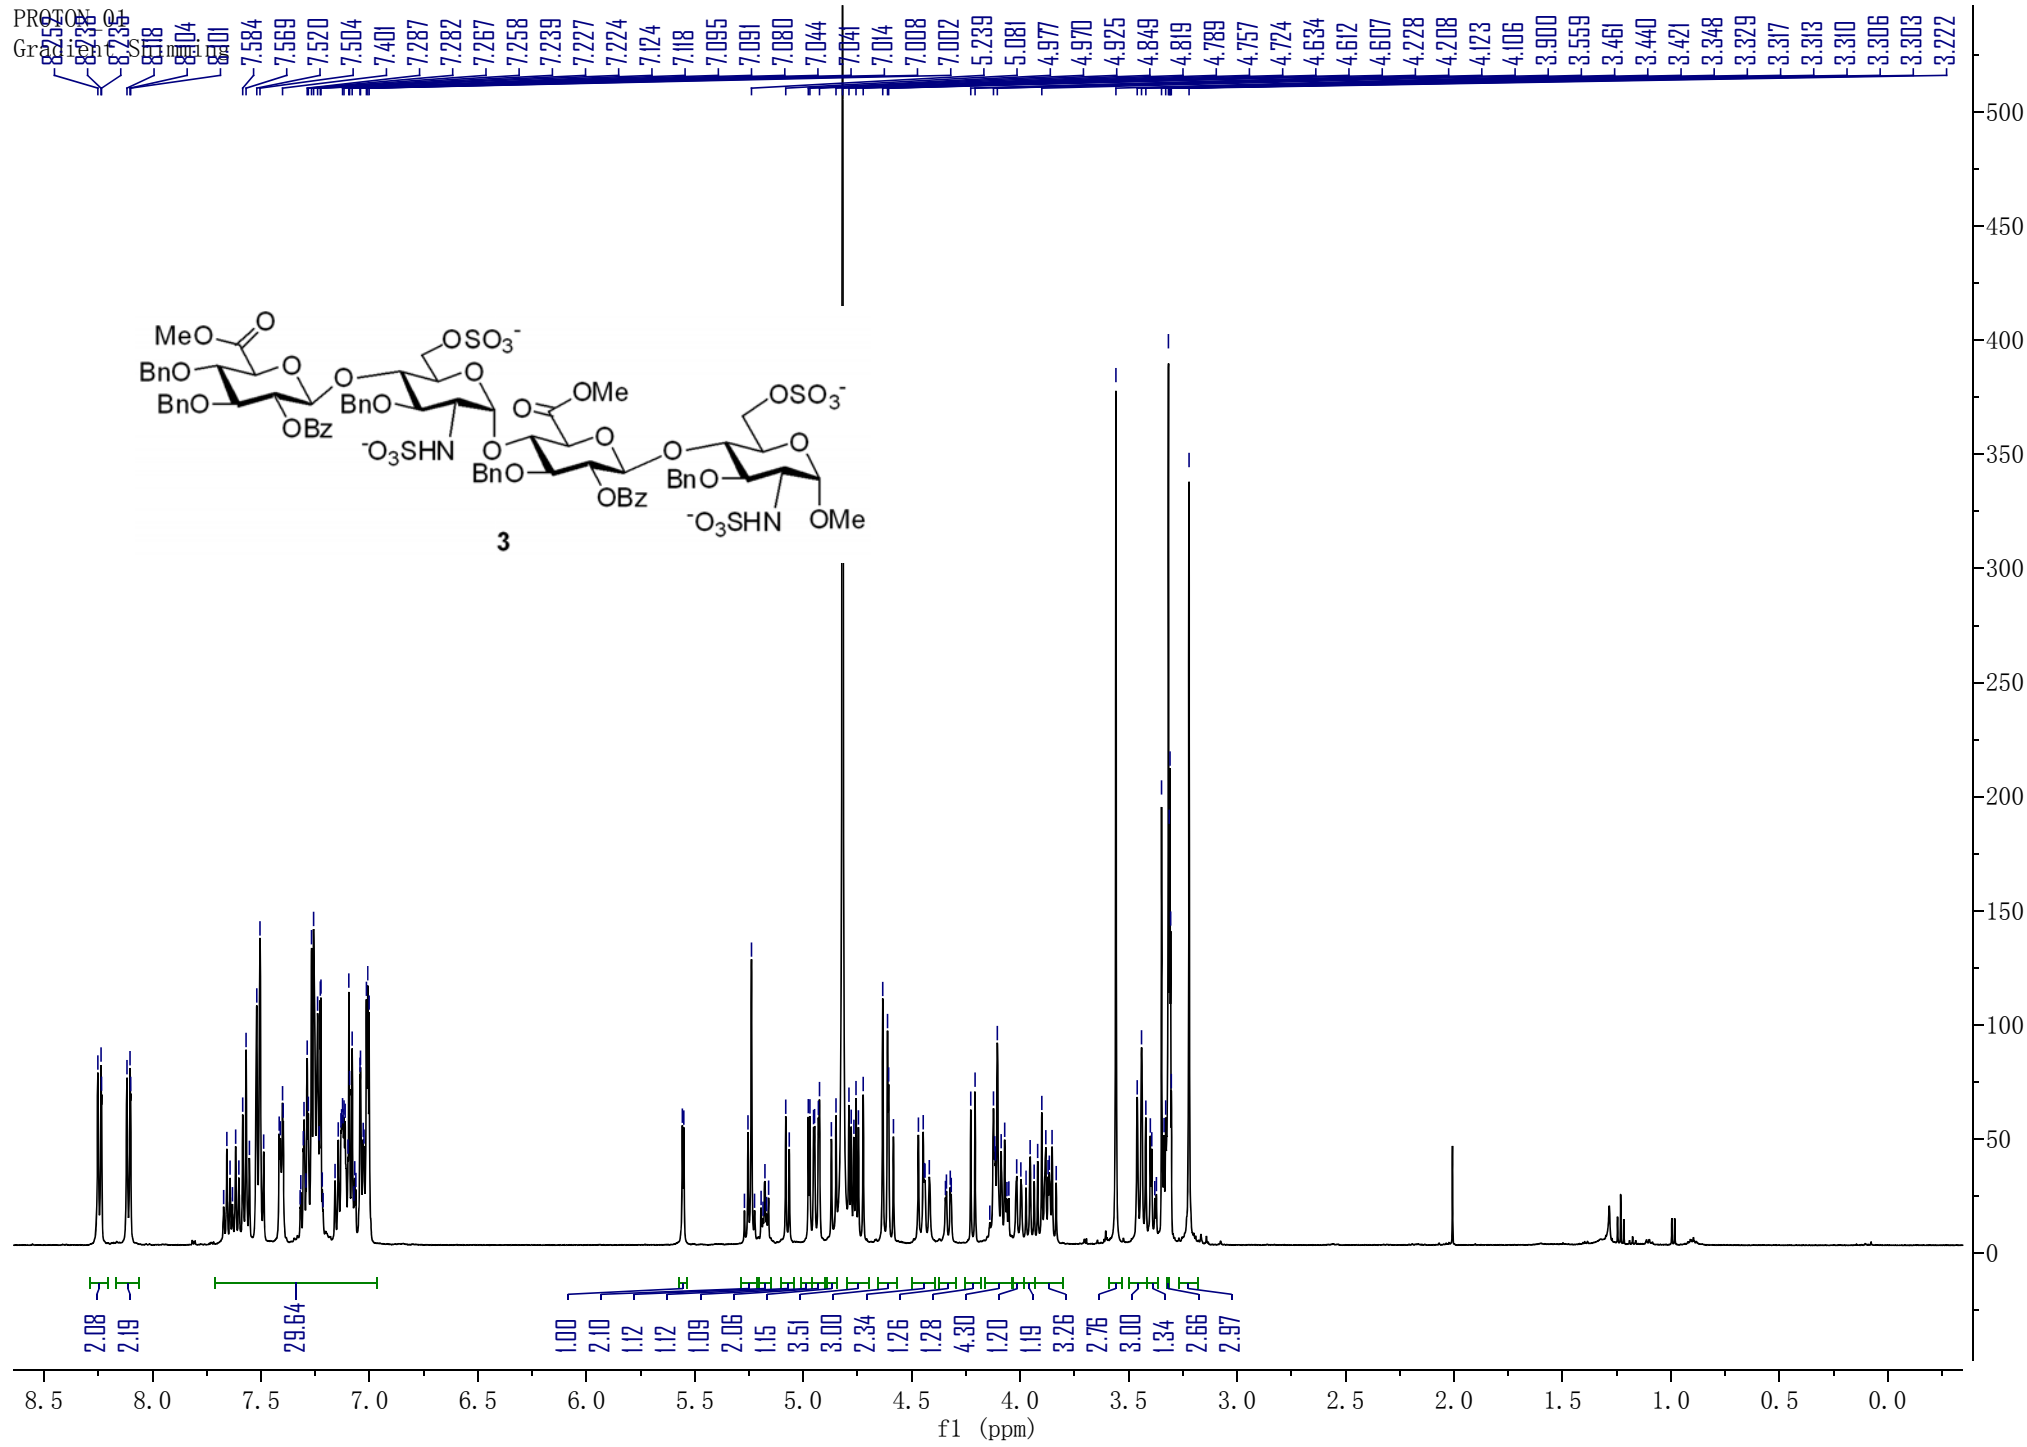

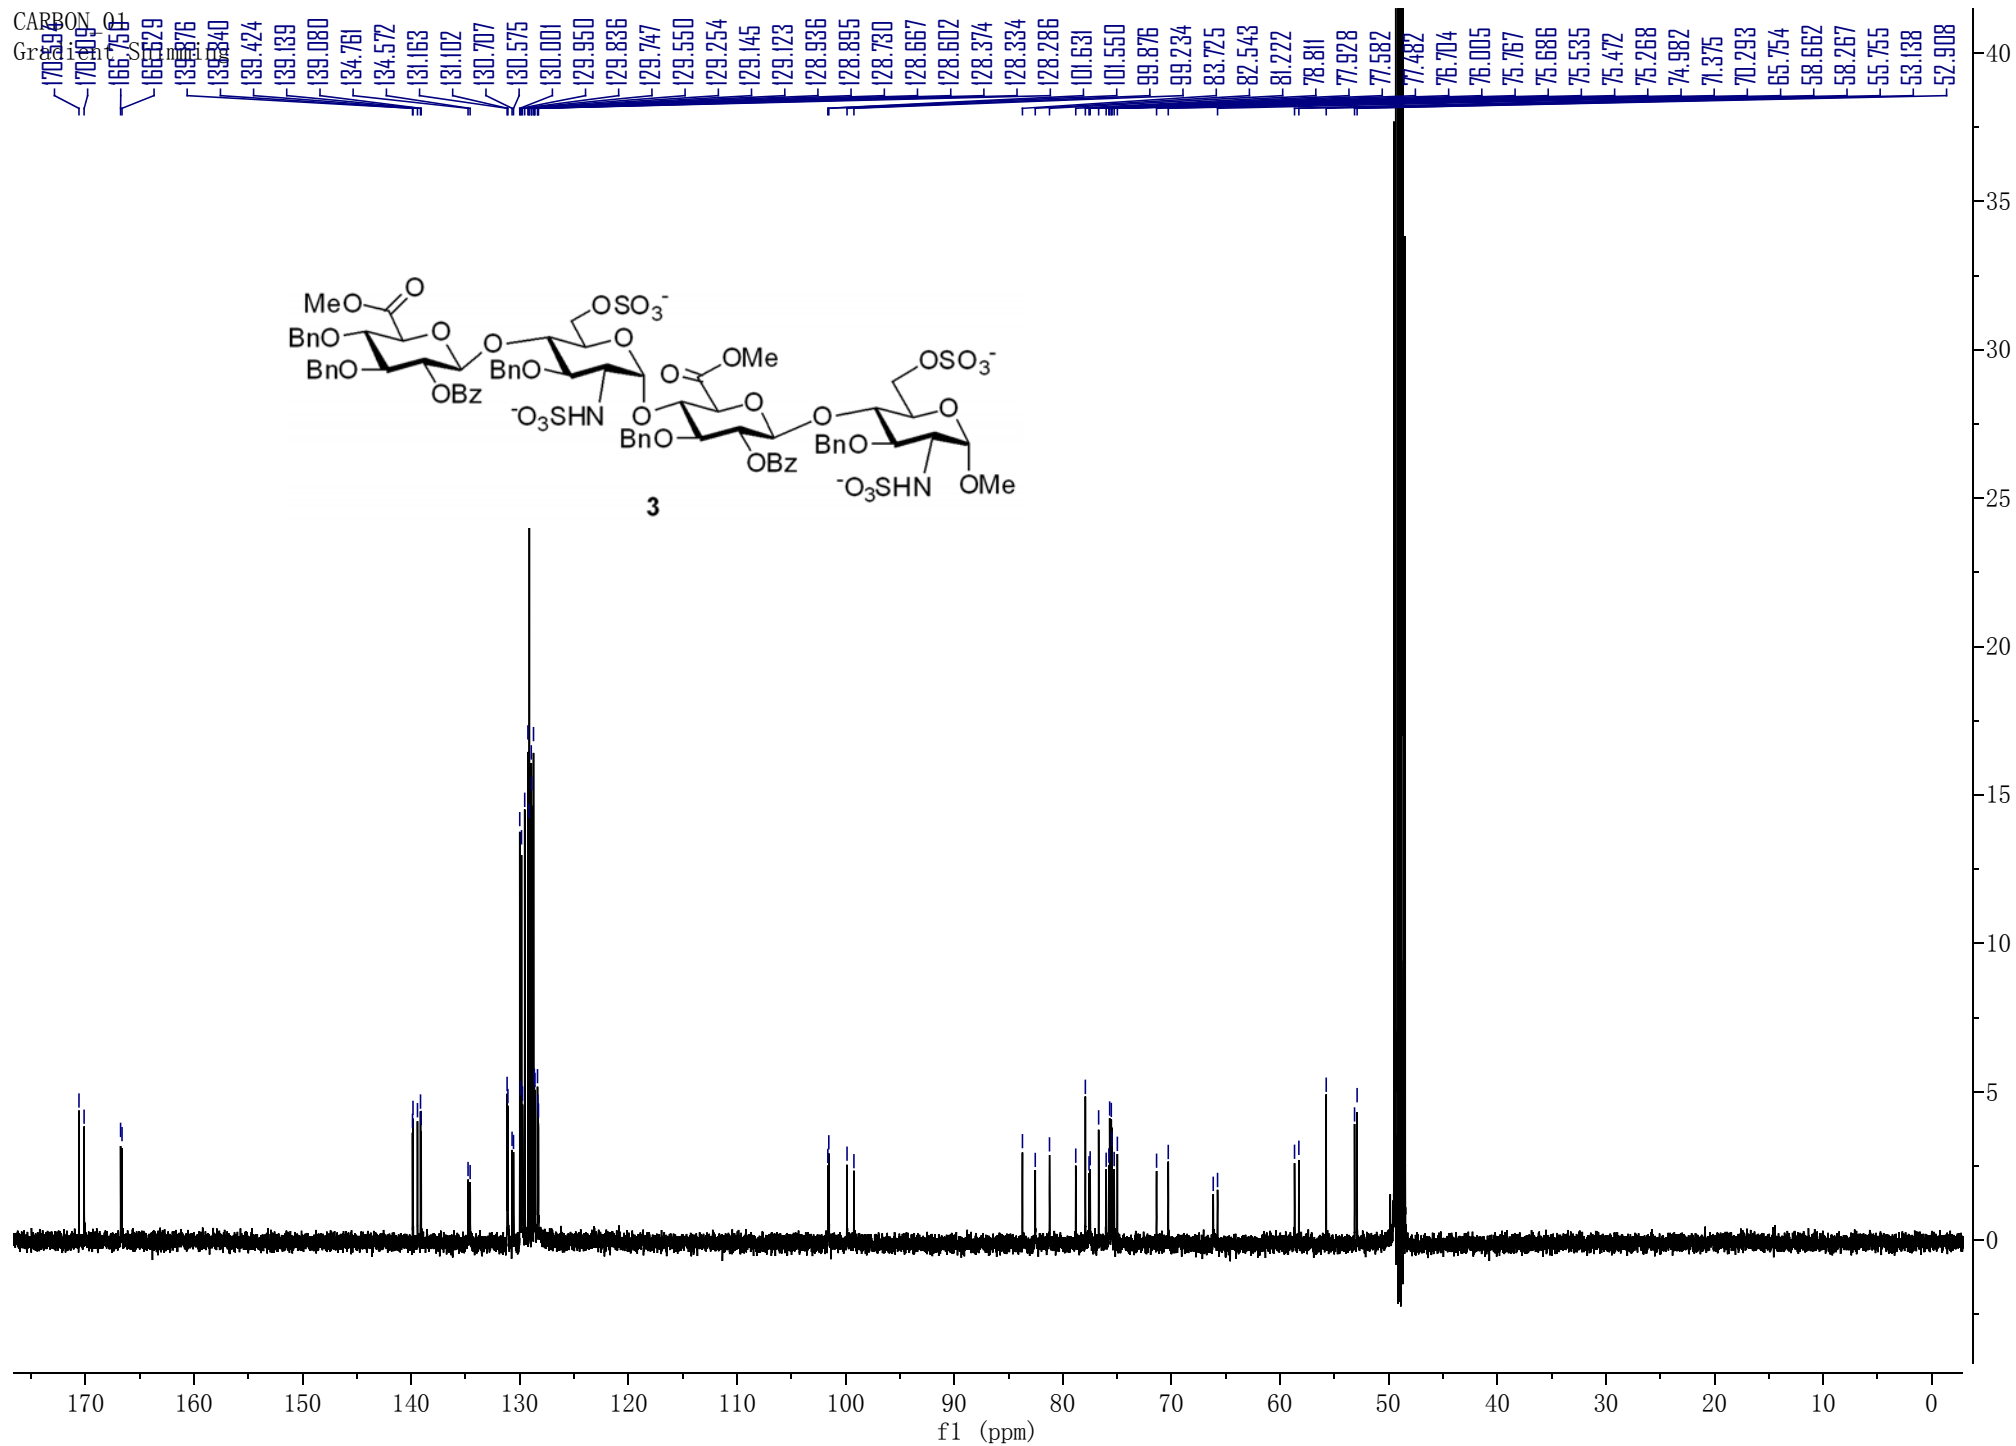

2011年8月

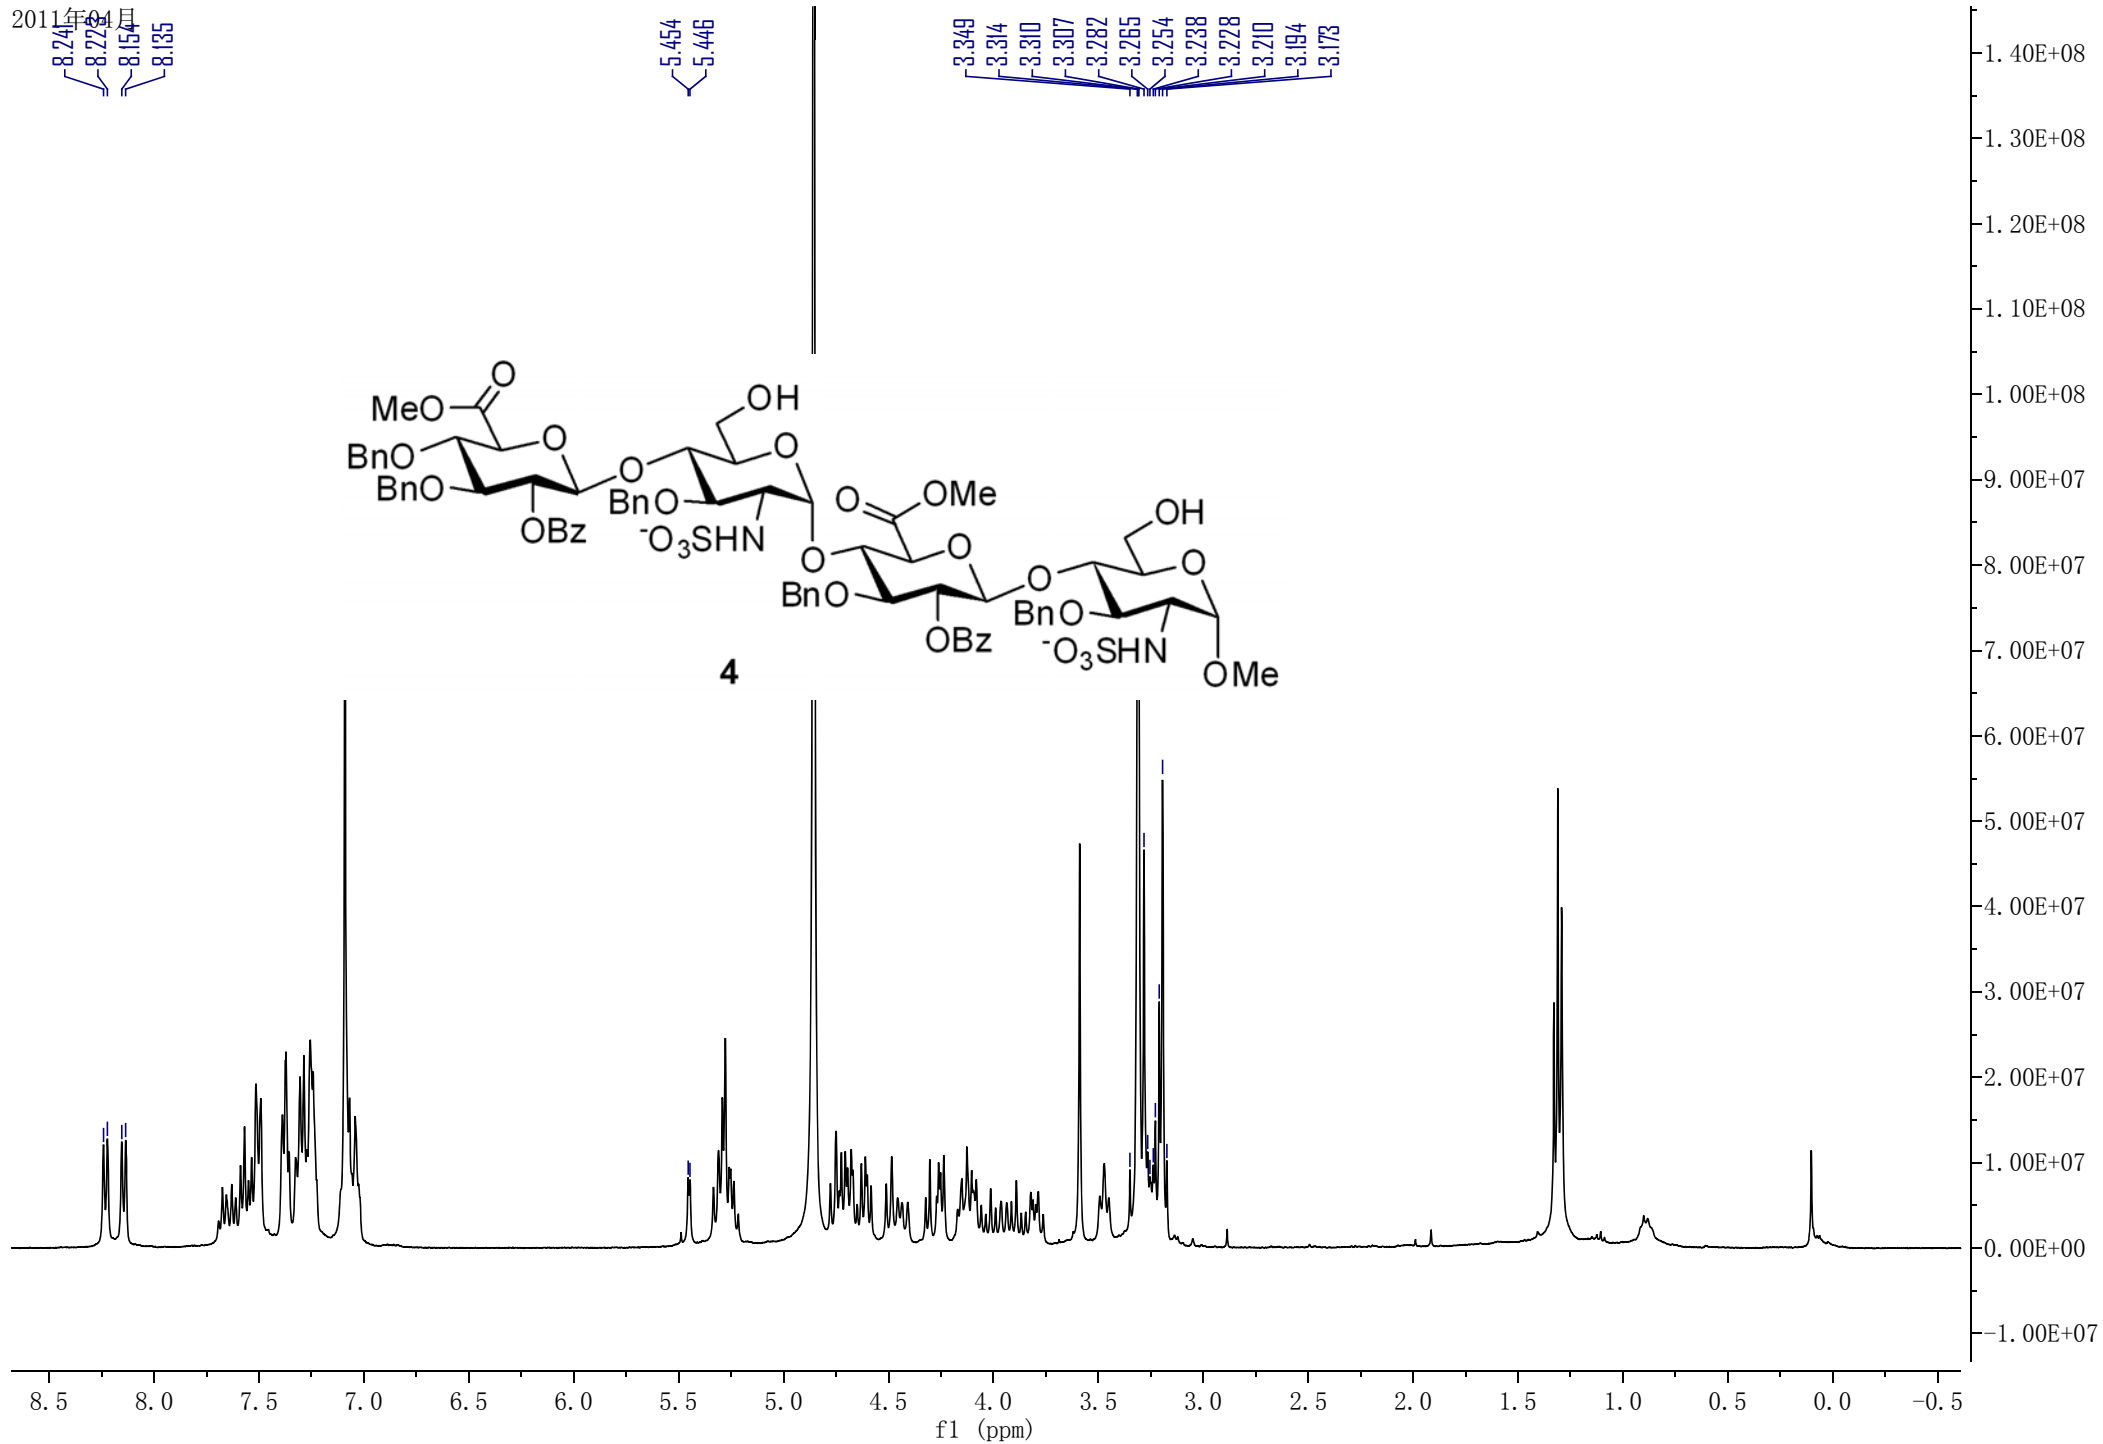

2011年04月

8.269  
8.249  
8.175  
8.156

5.273  
5.259  
5.241  
5.218  
5.208  
5.197  
5.182  
5.160  
5.133

2.925  
2.916  
2.899  
2.719  
2.694

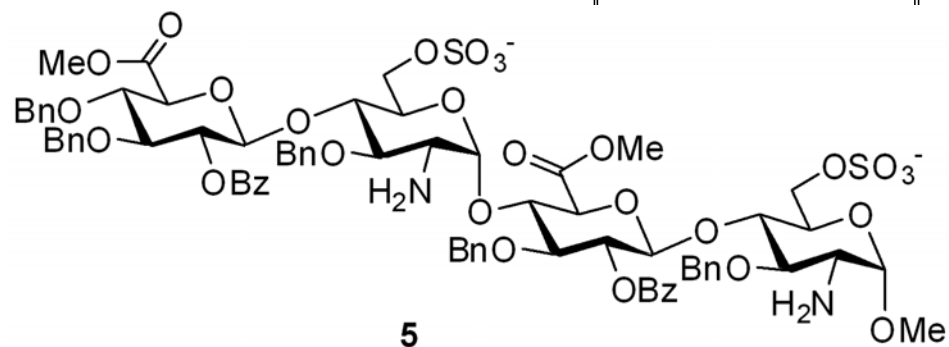

5

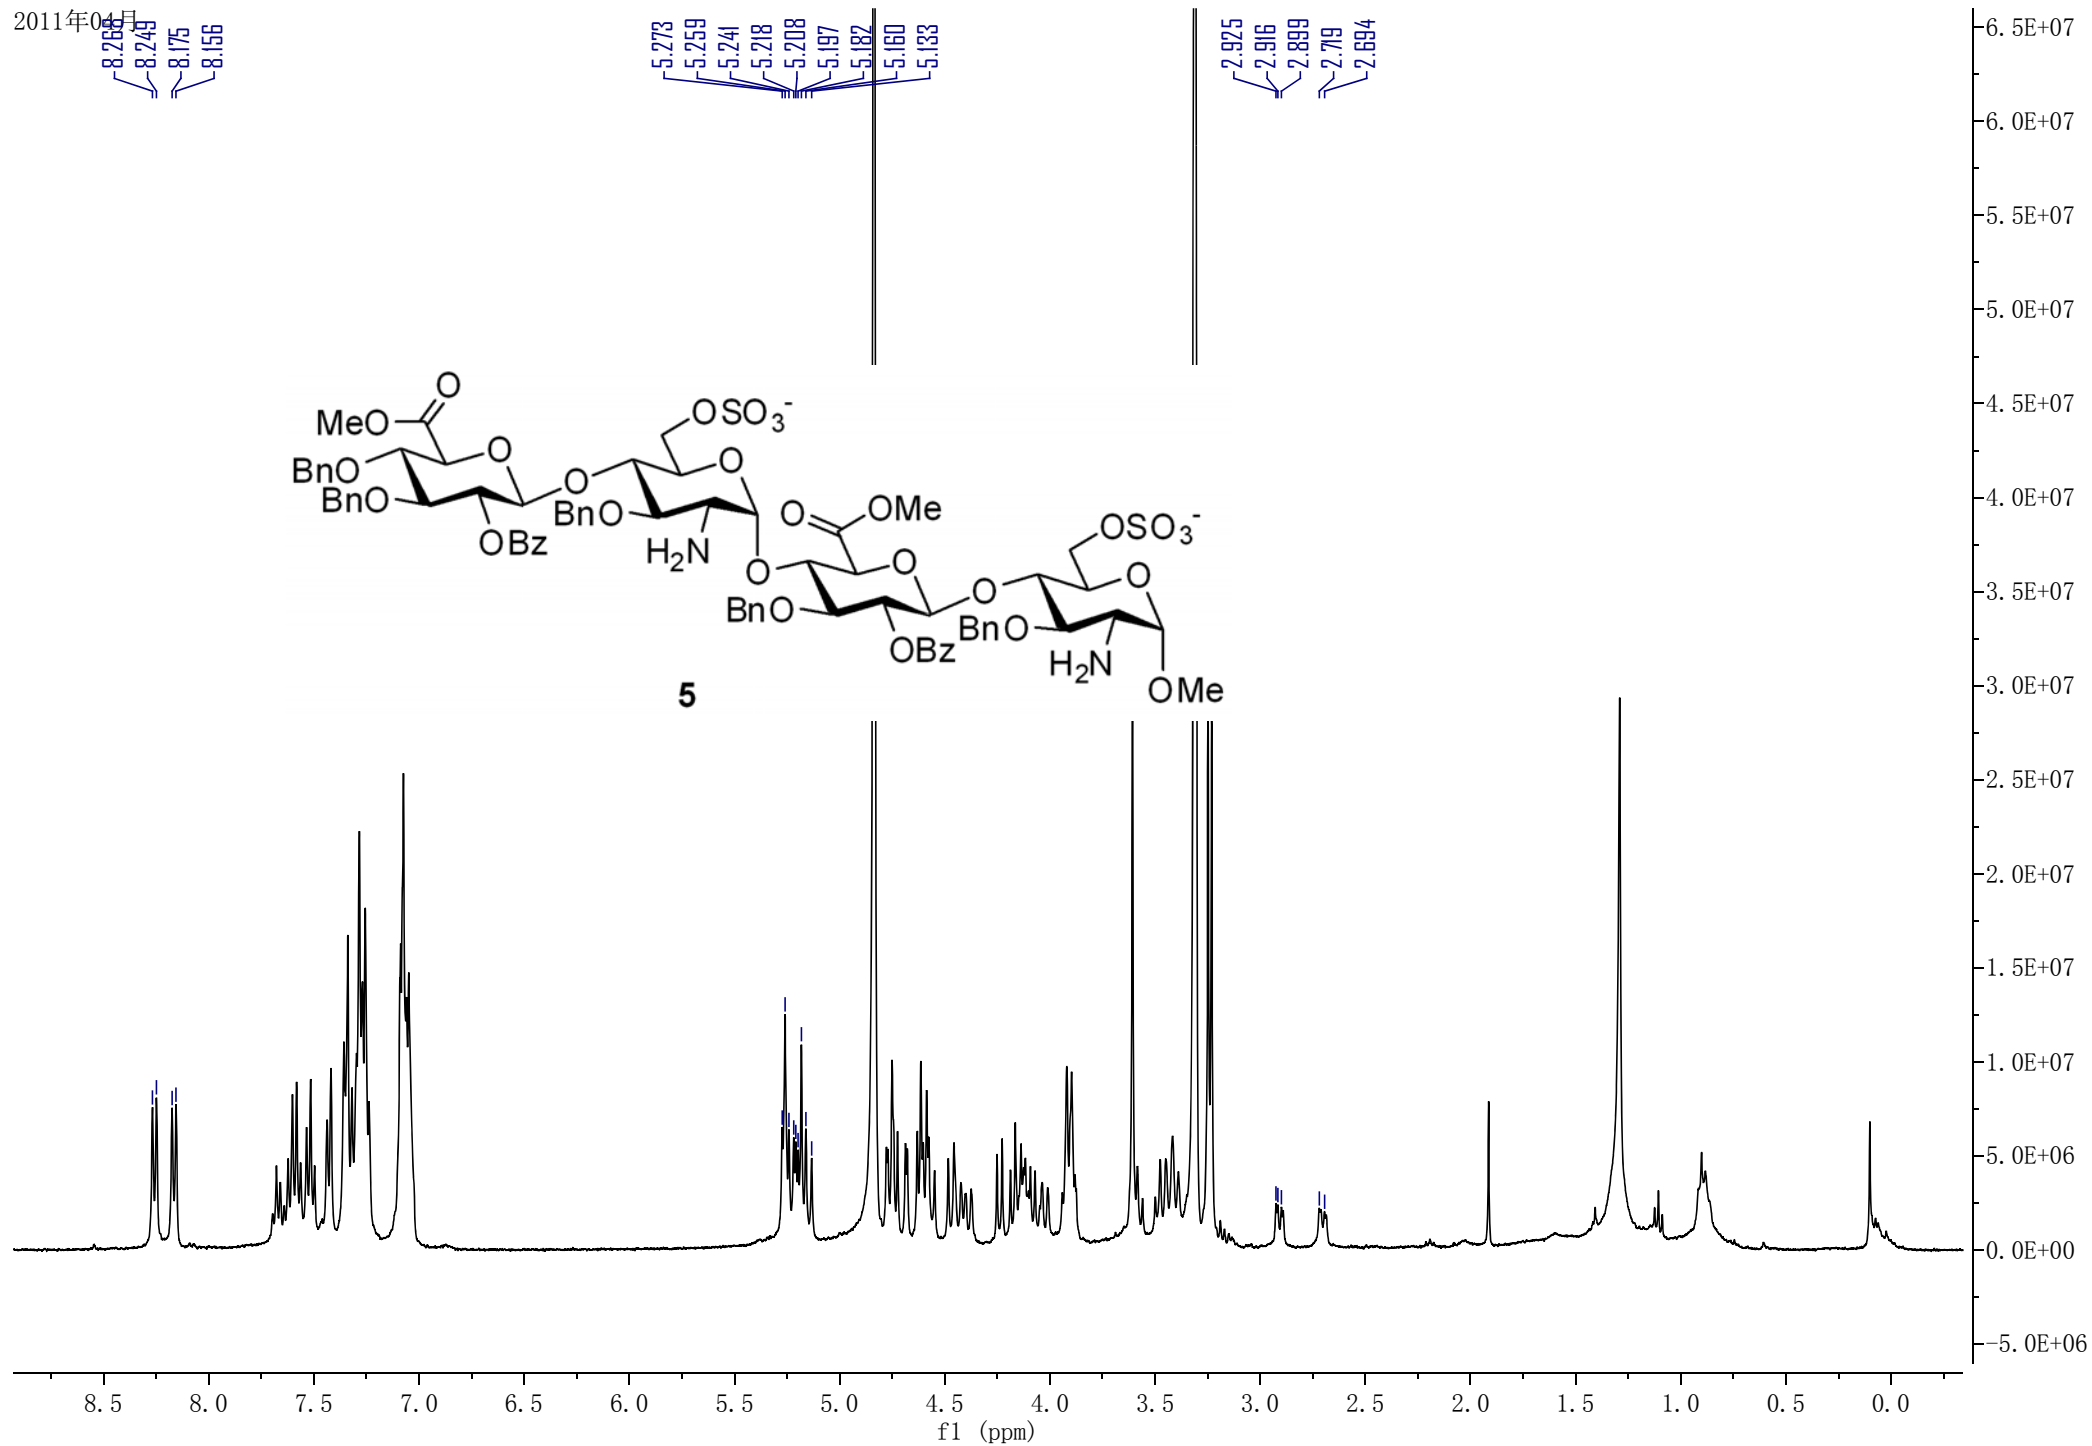

2008112xp10-42h

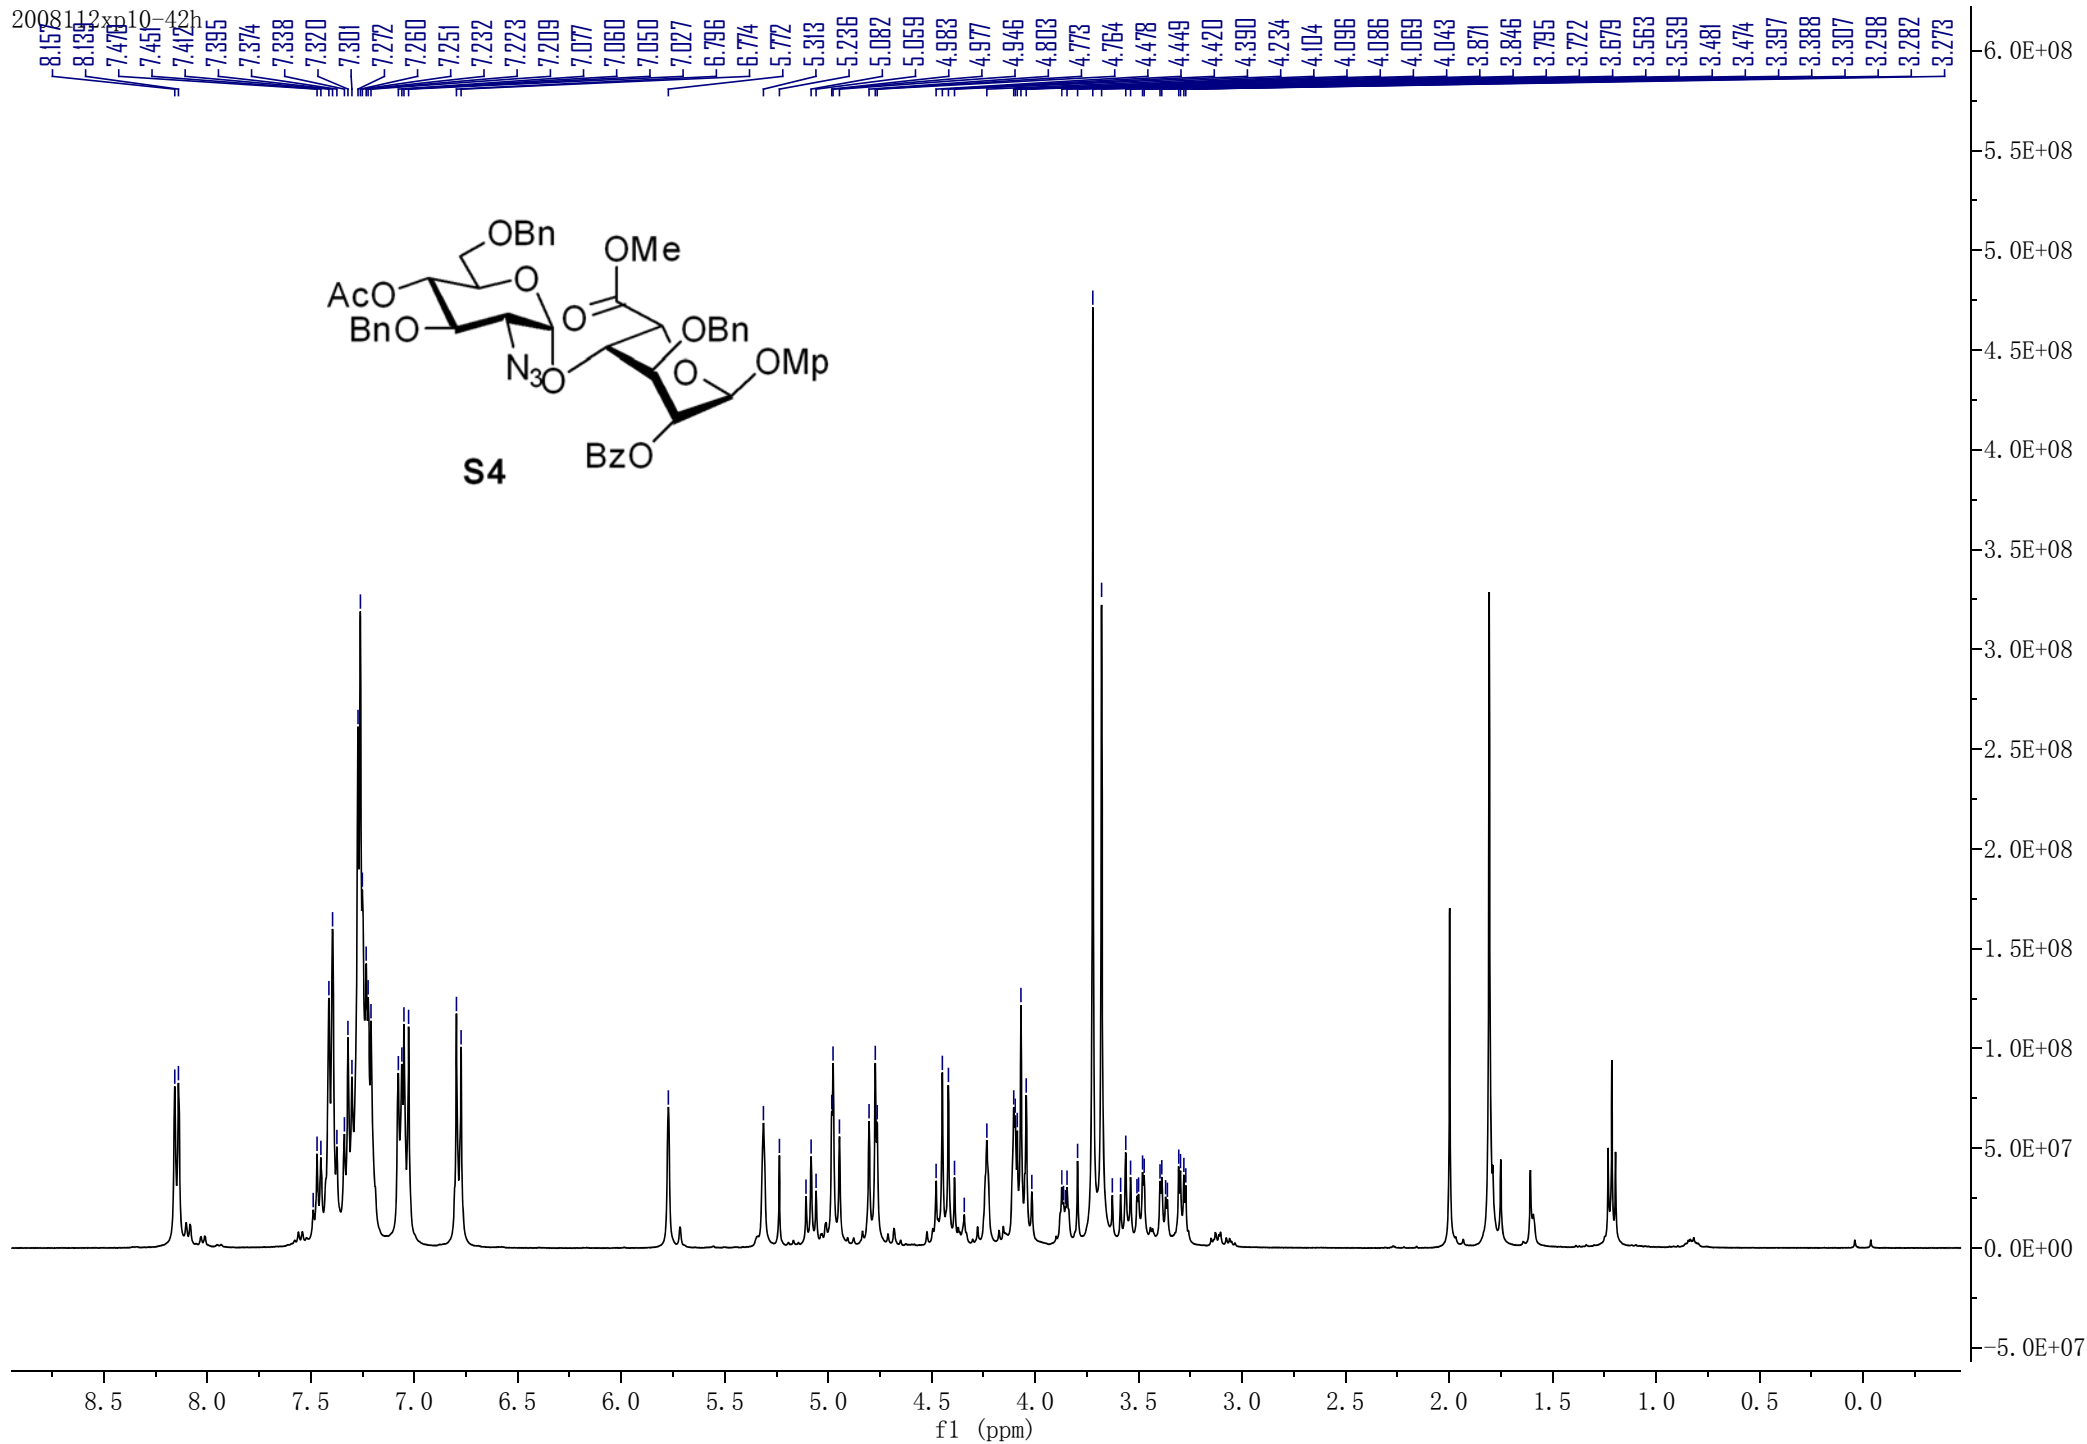

2008112xp10-42h

169.401  
169.299  
165.673  
155.356  
150.624  
130.129  
128.681  
128.533  
128.454  
128.401  
128.123  
128.103  
117.860  
116.053  
114.759  
99.052  
98.310  
78.322  
77.477  
77.160  
76.842  
75.376  
74.546  
73.744  
72.660  
69.954  
68.564  
68.412  
55.751  
52.388

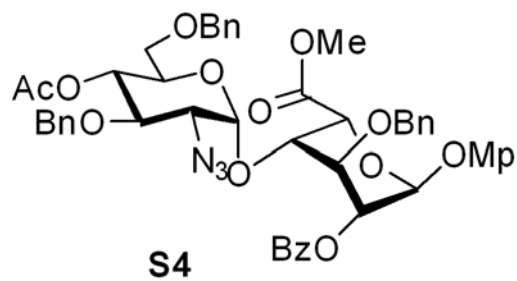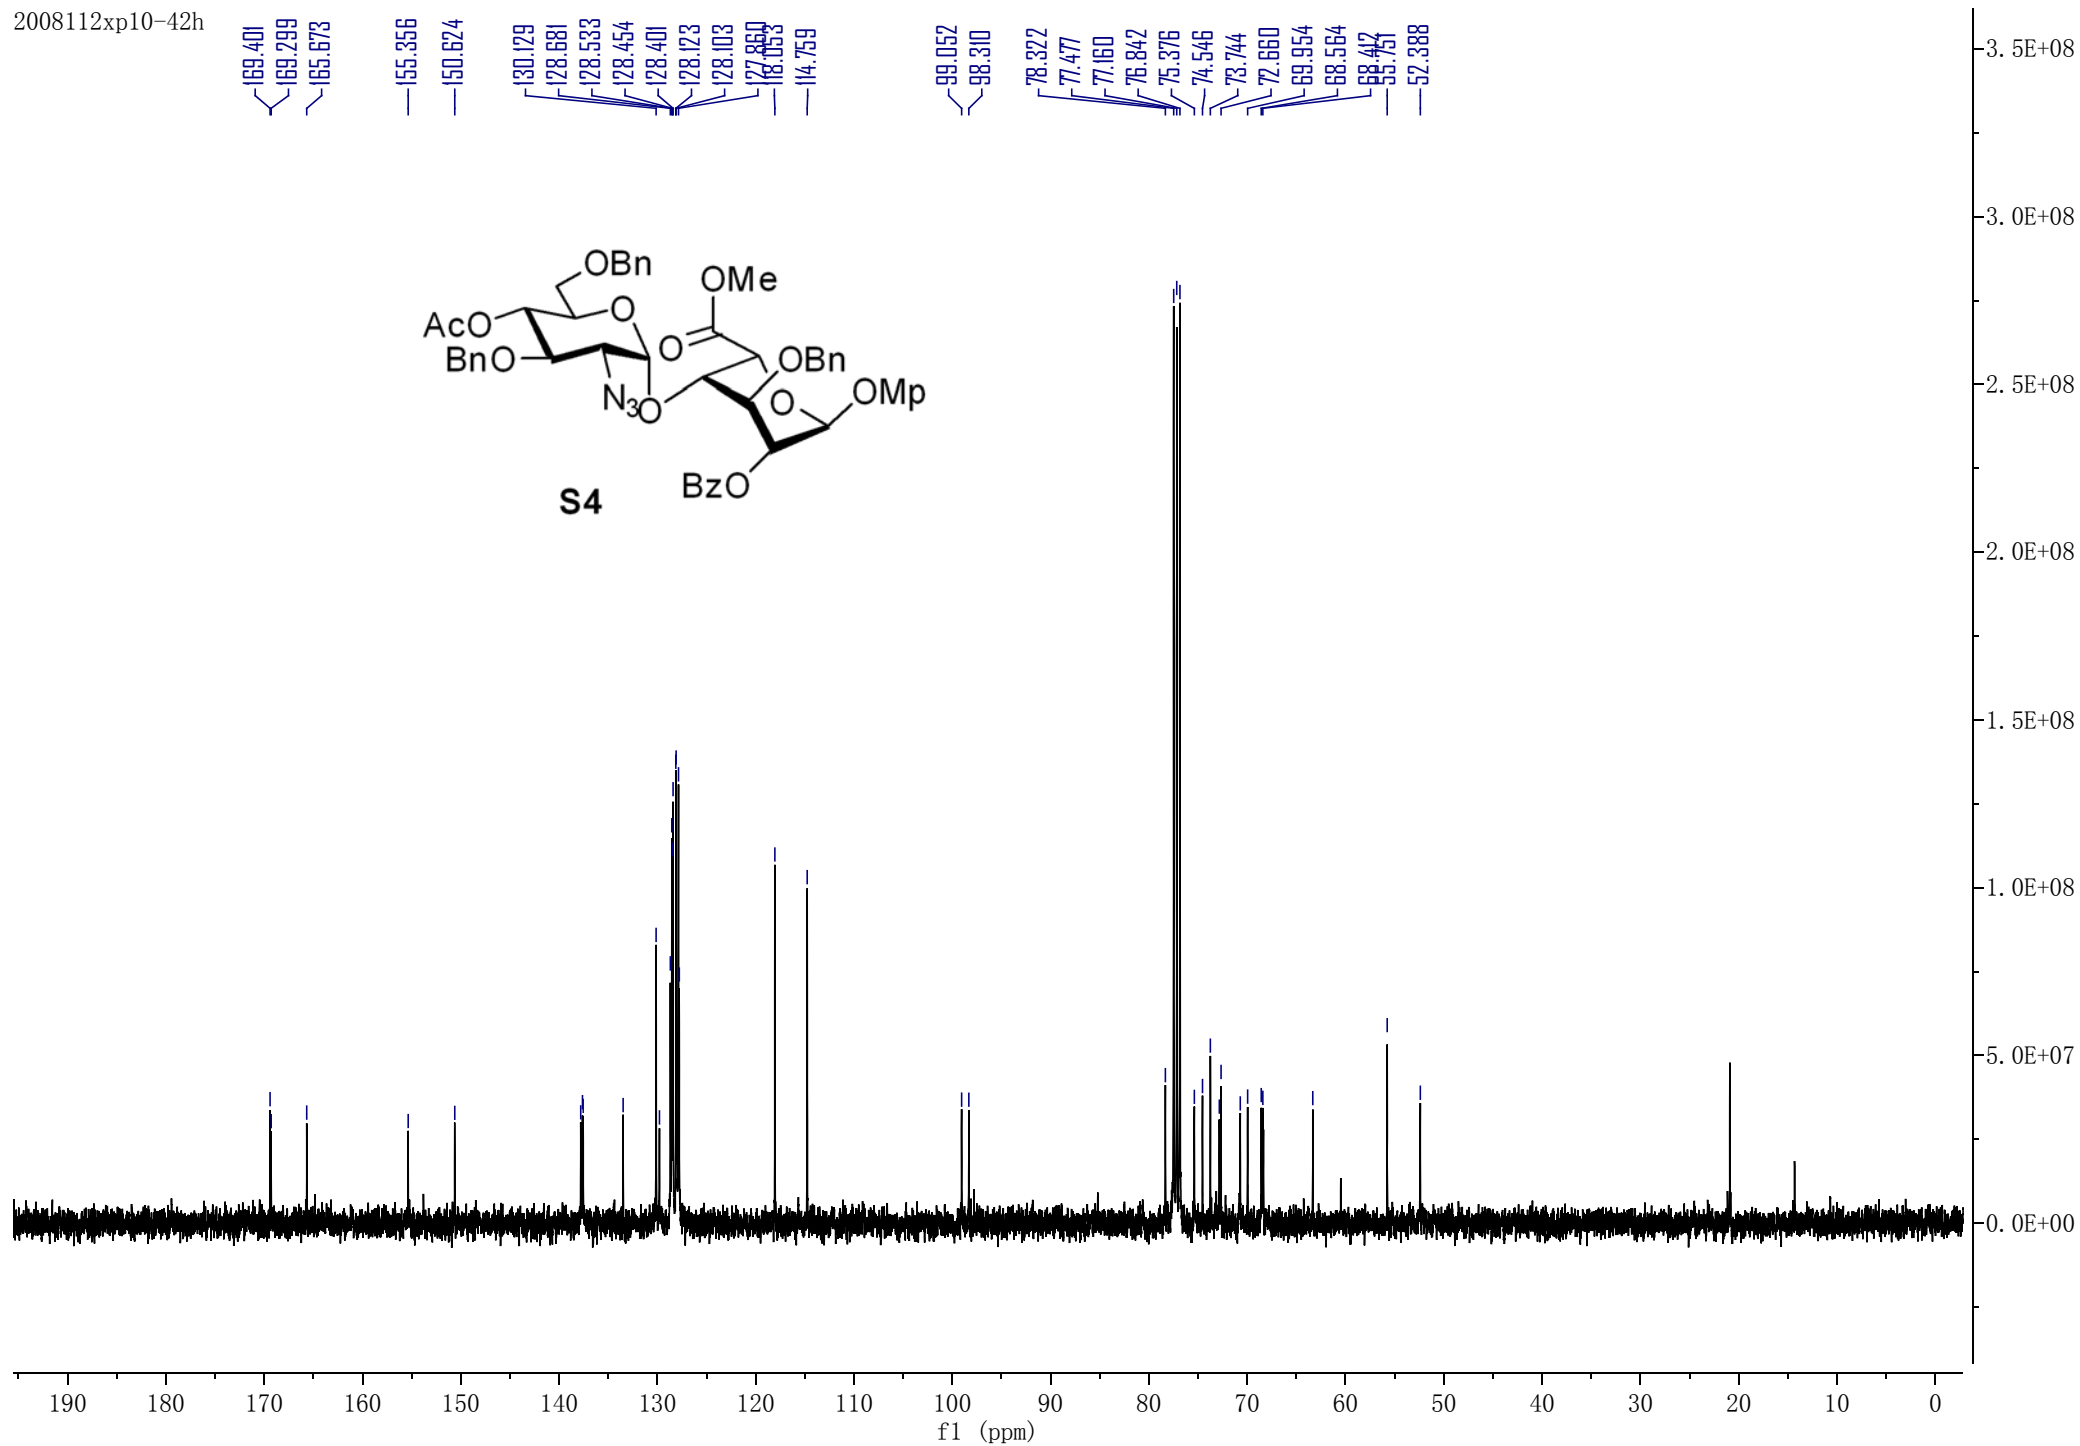



2008112x612-39.h

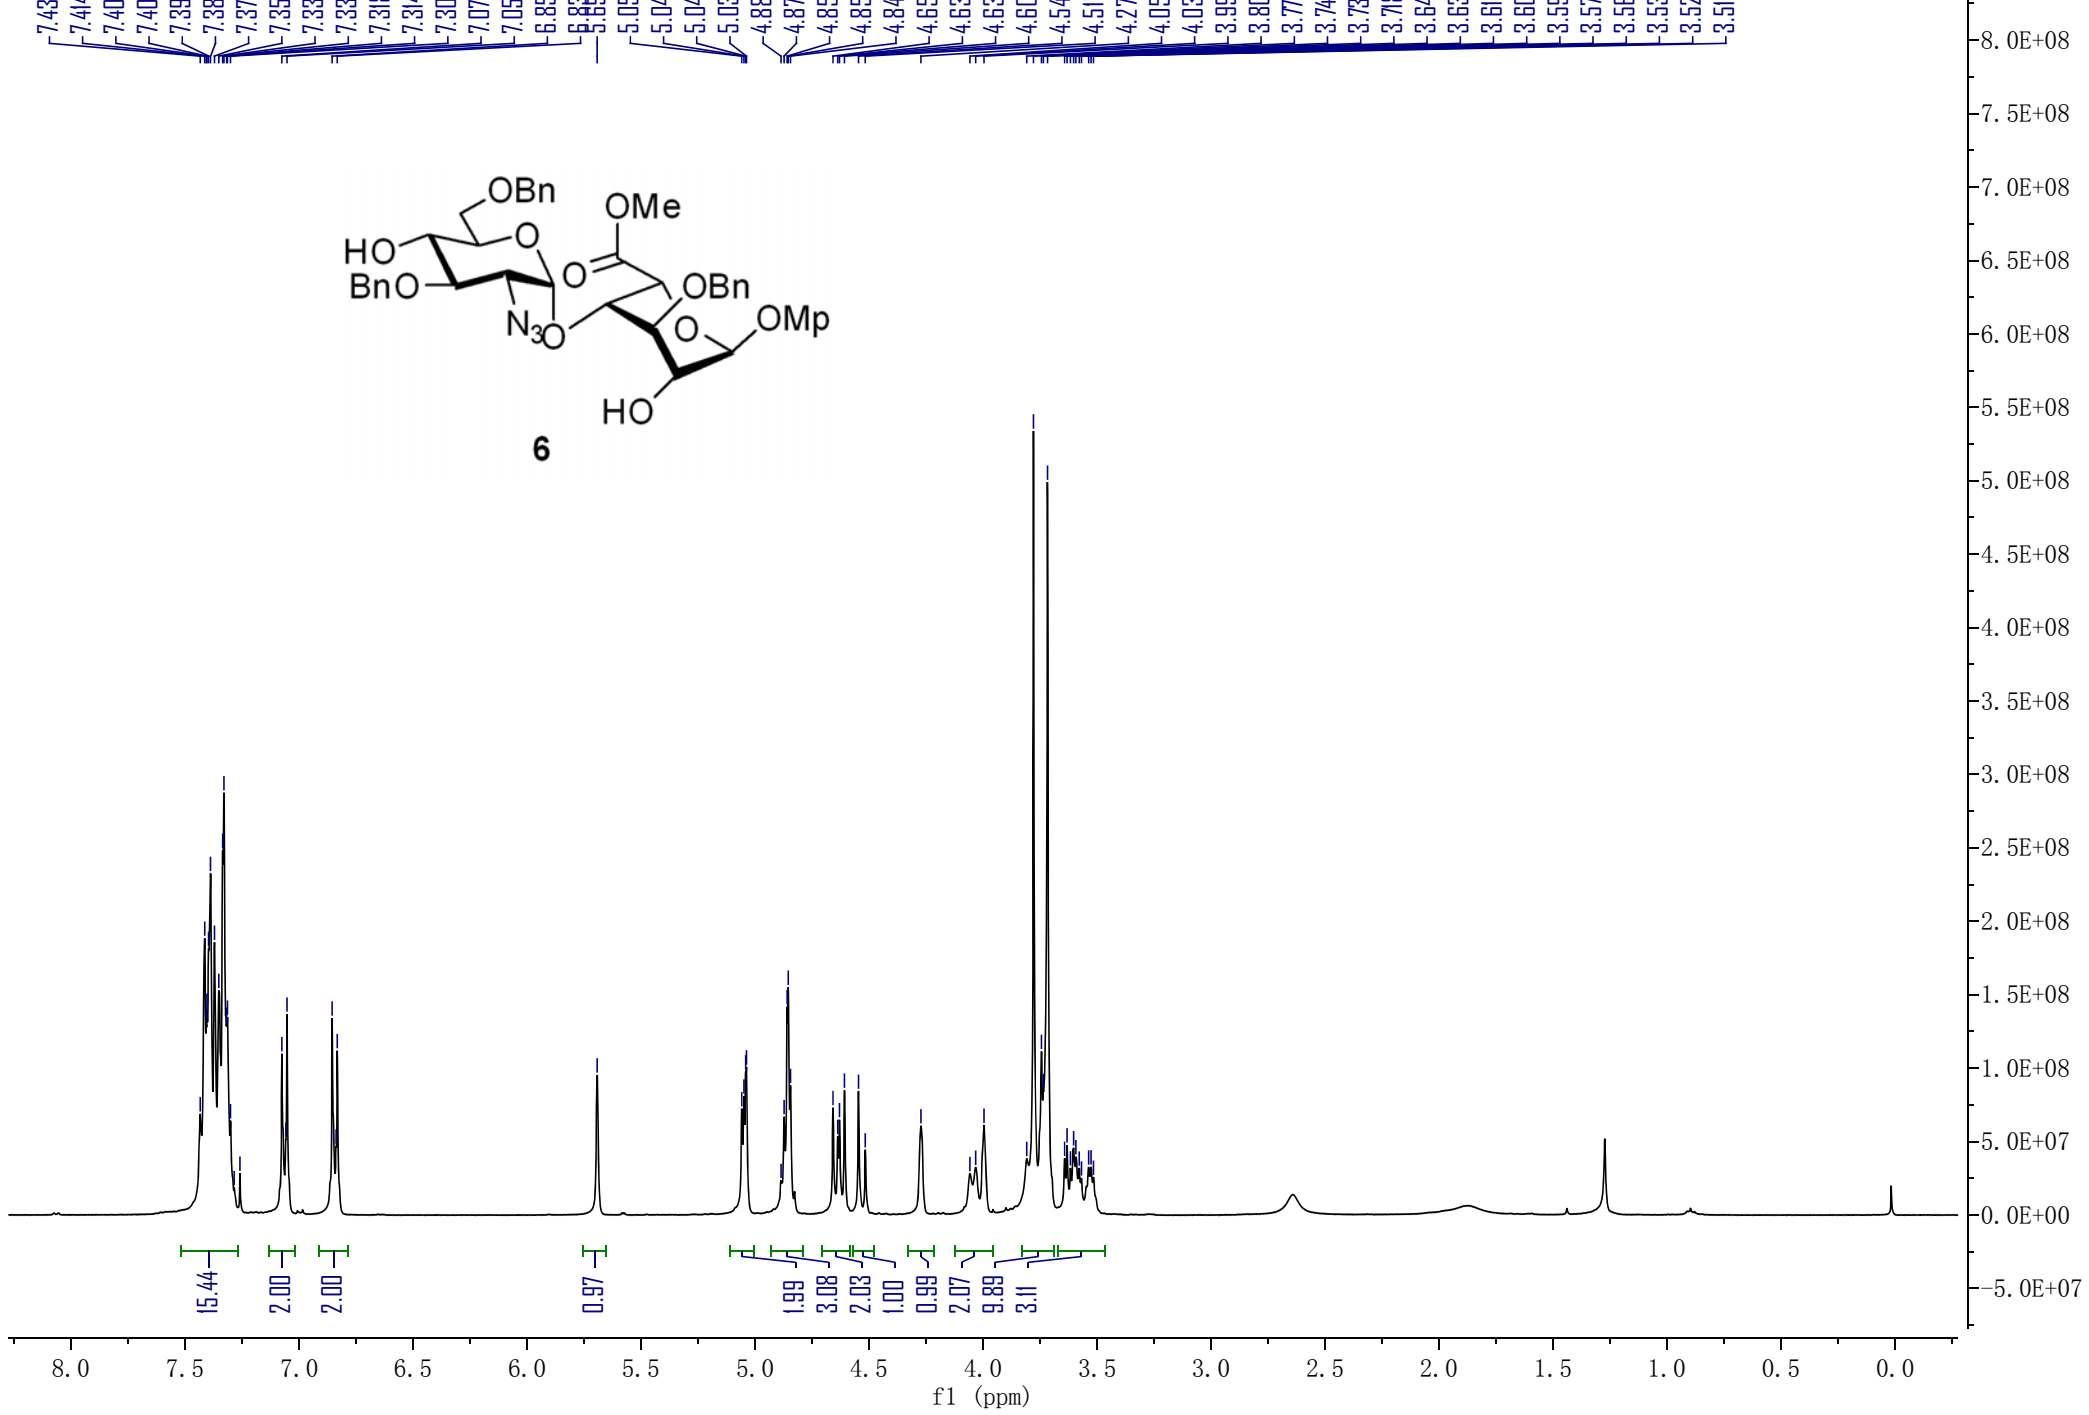

2012年07月

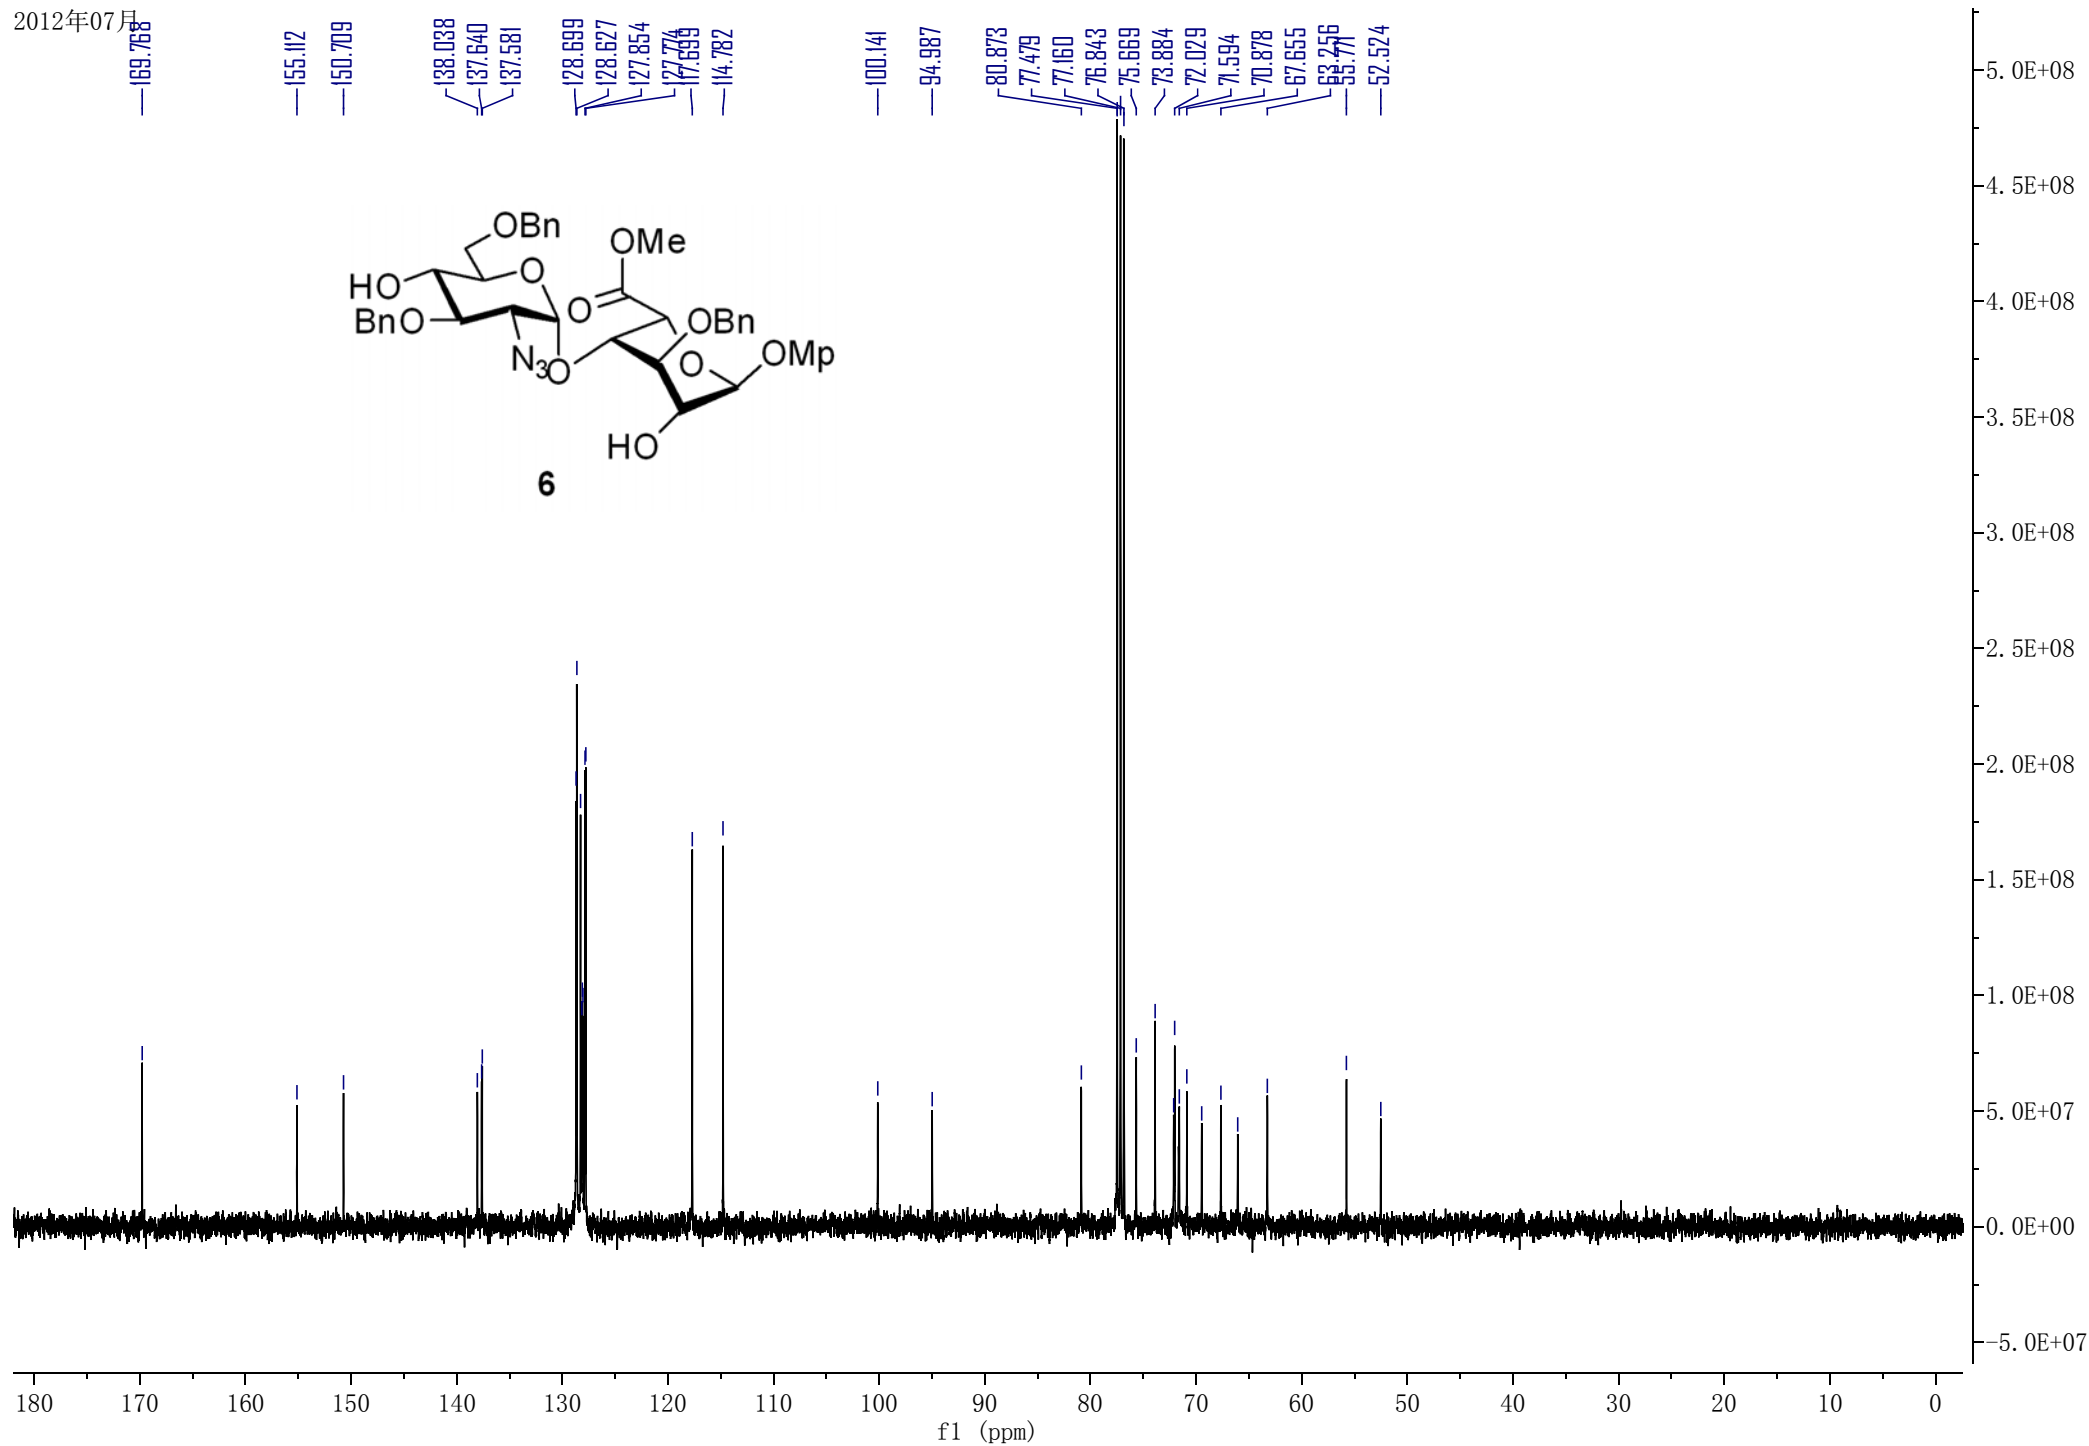

20081120p1244

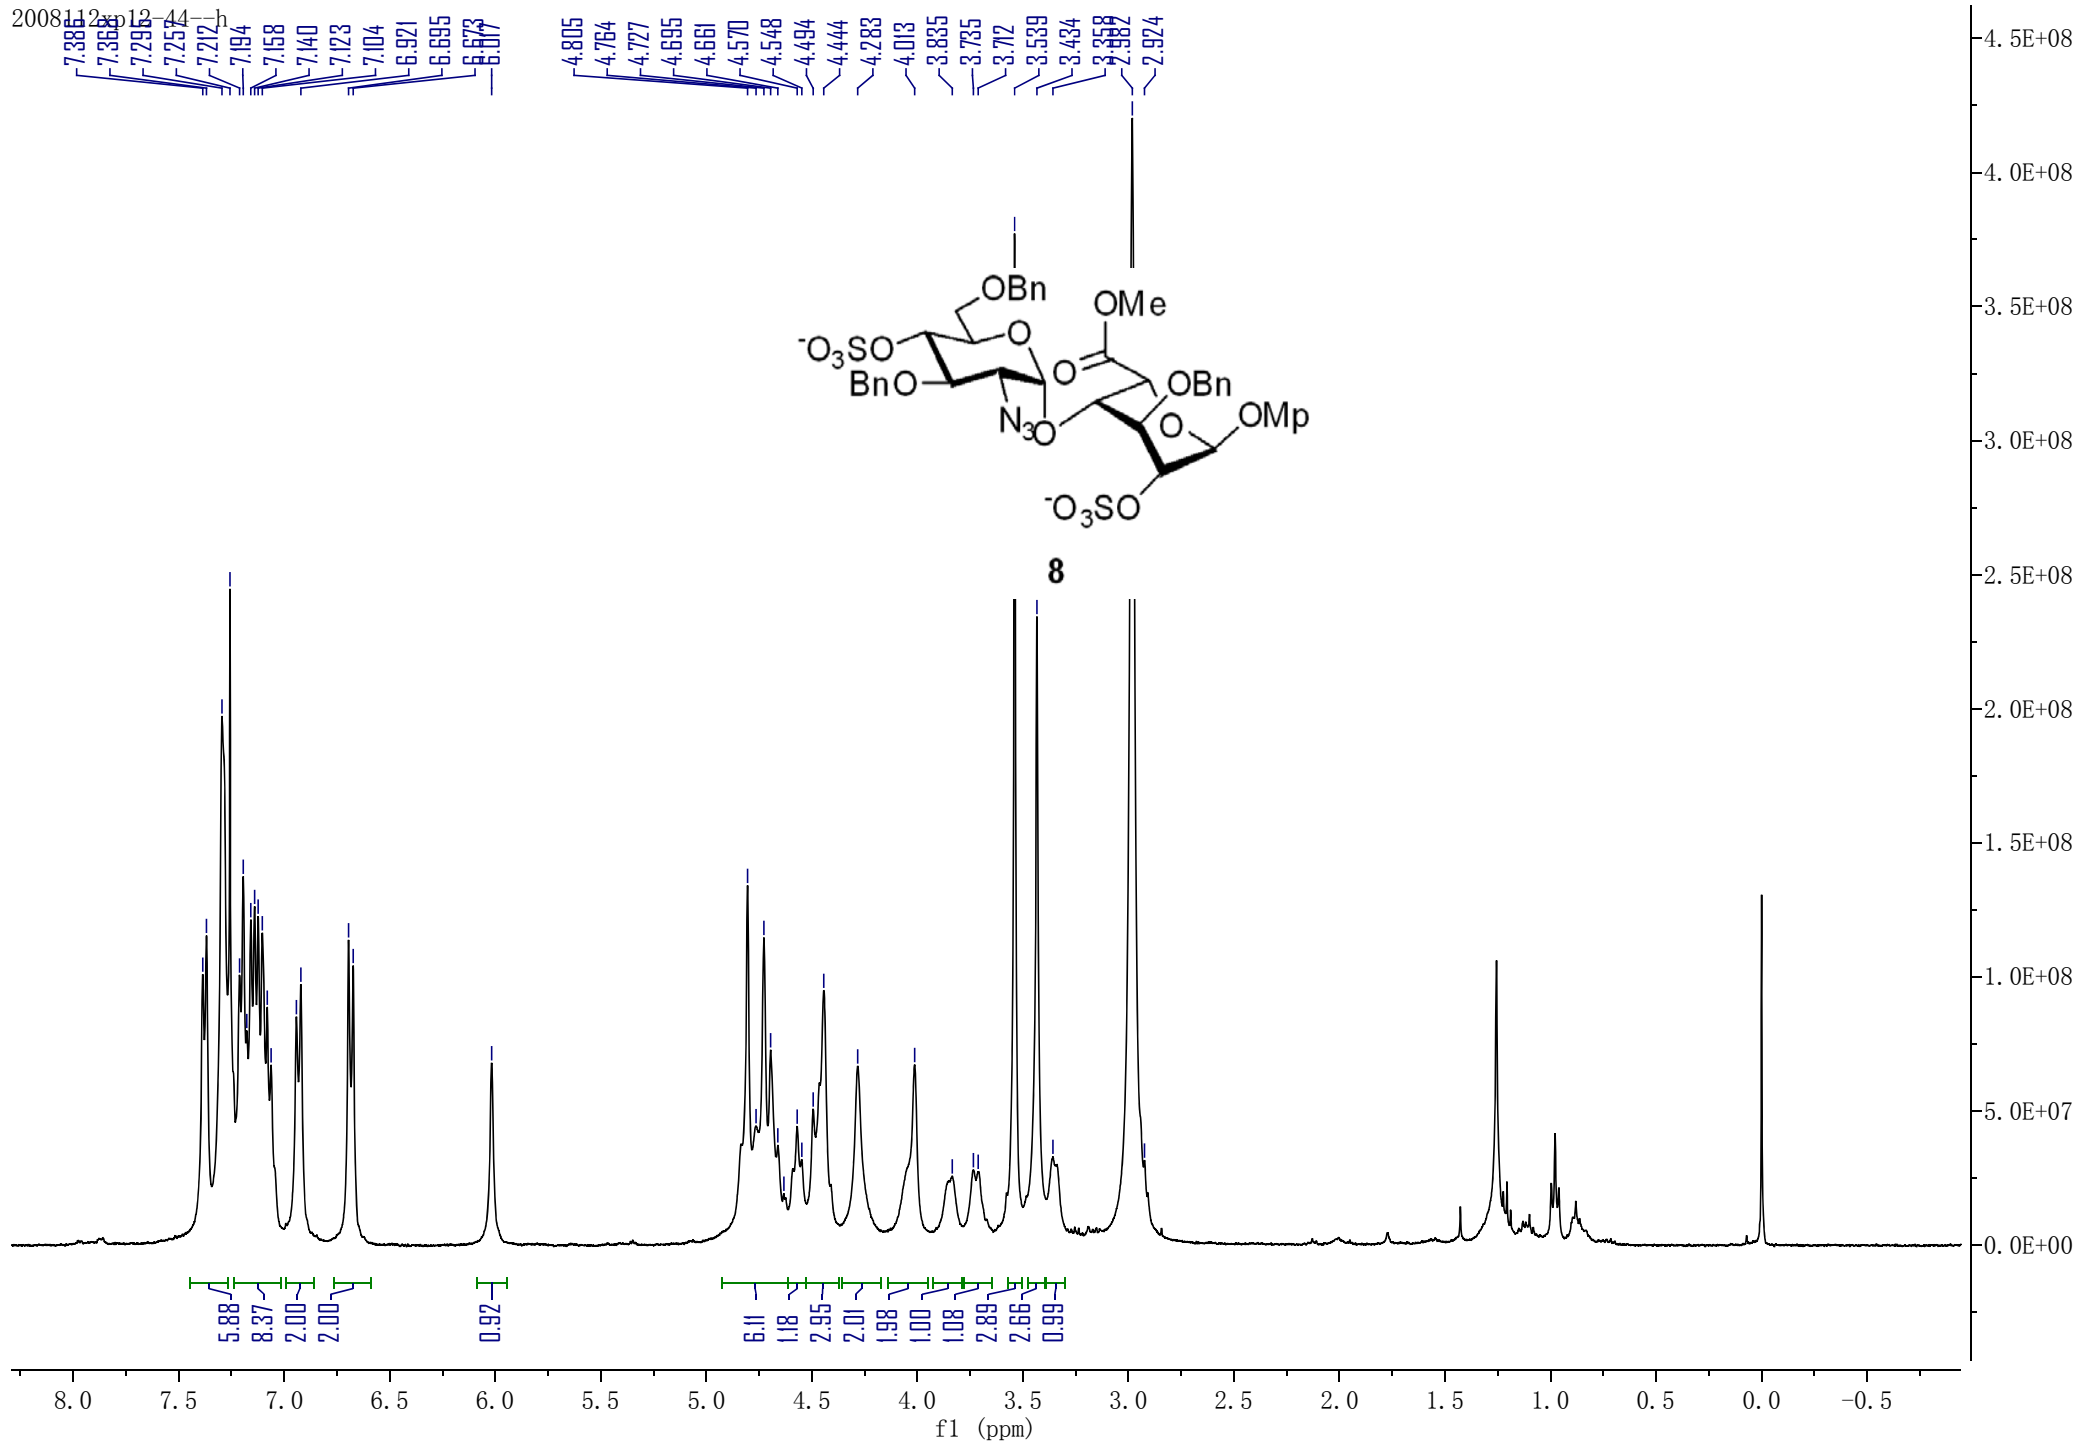

2012年07月

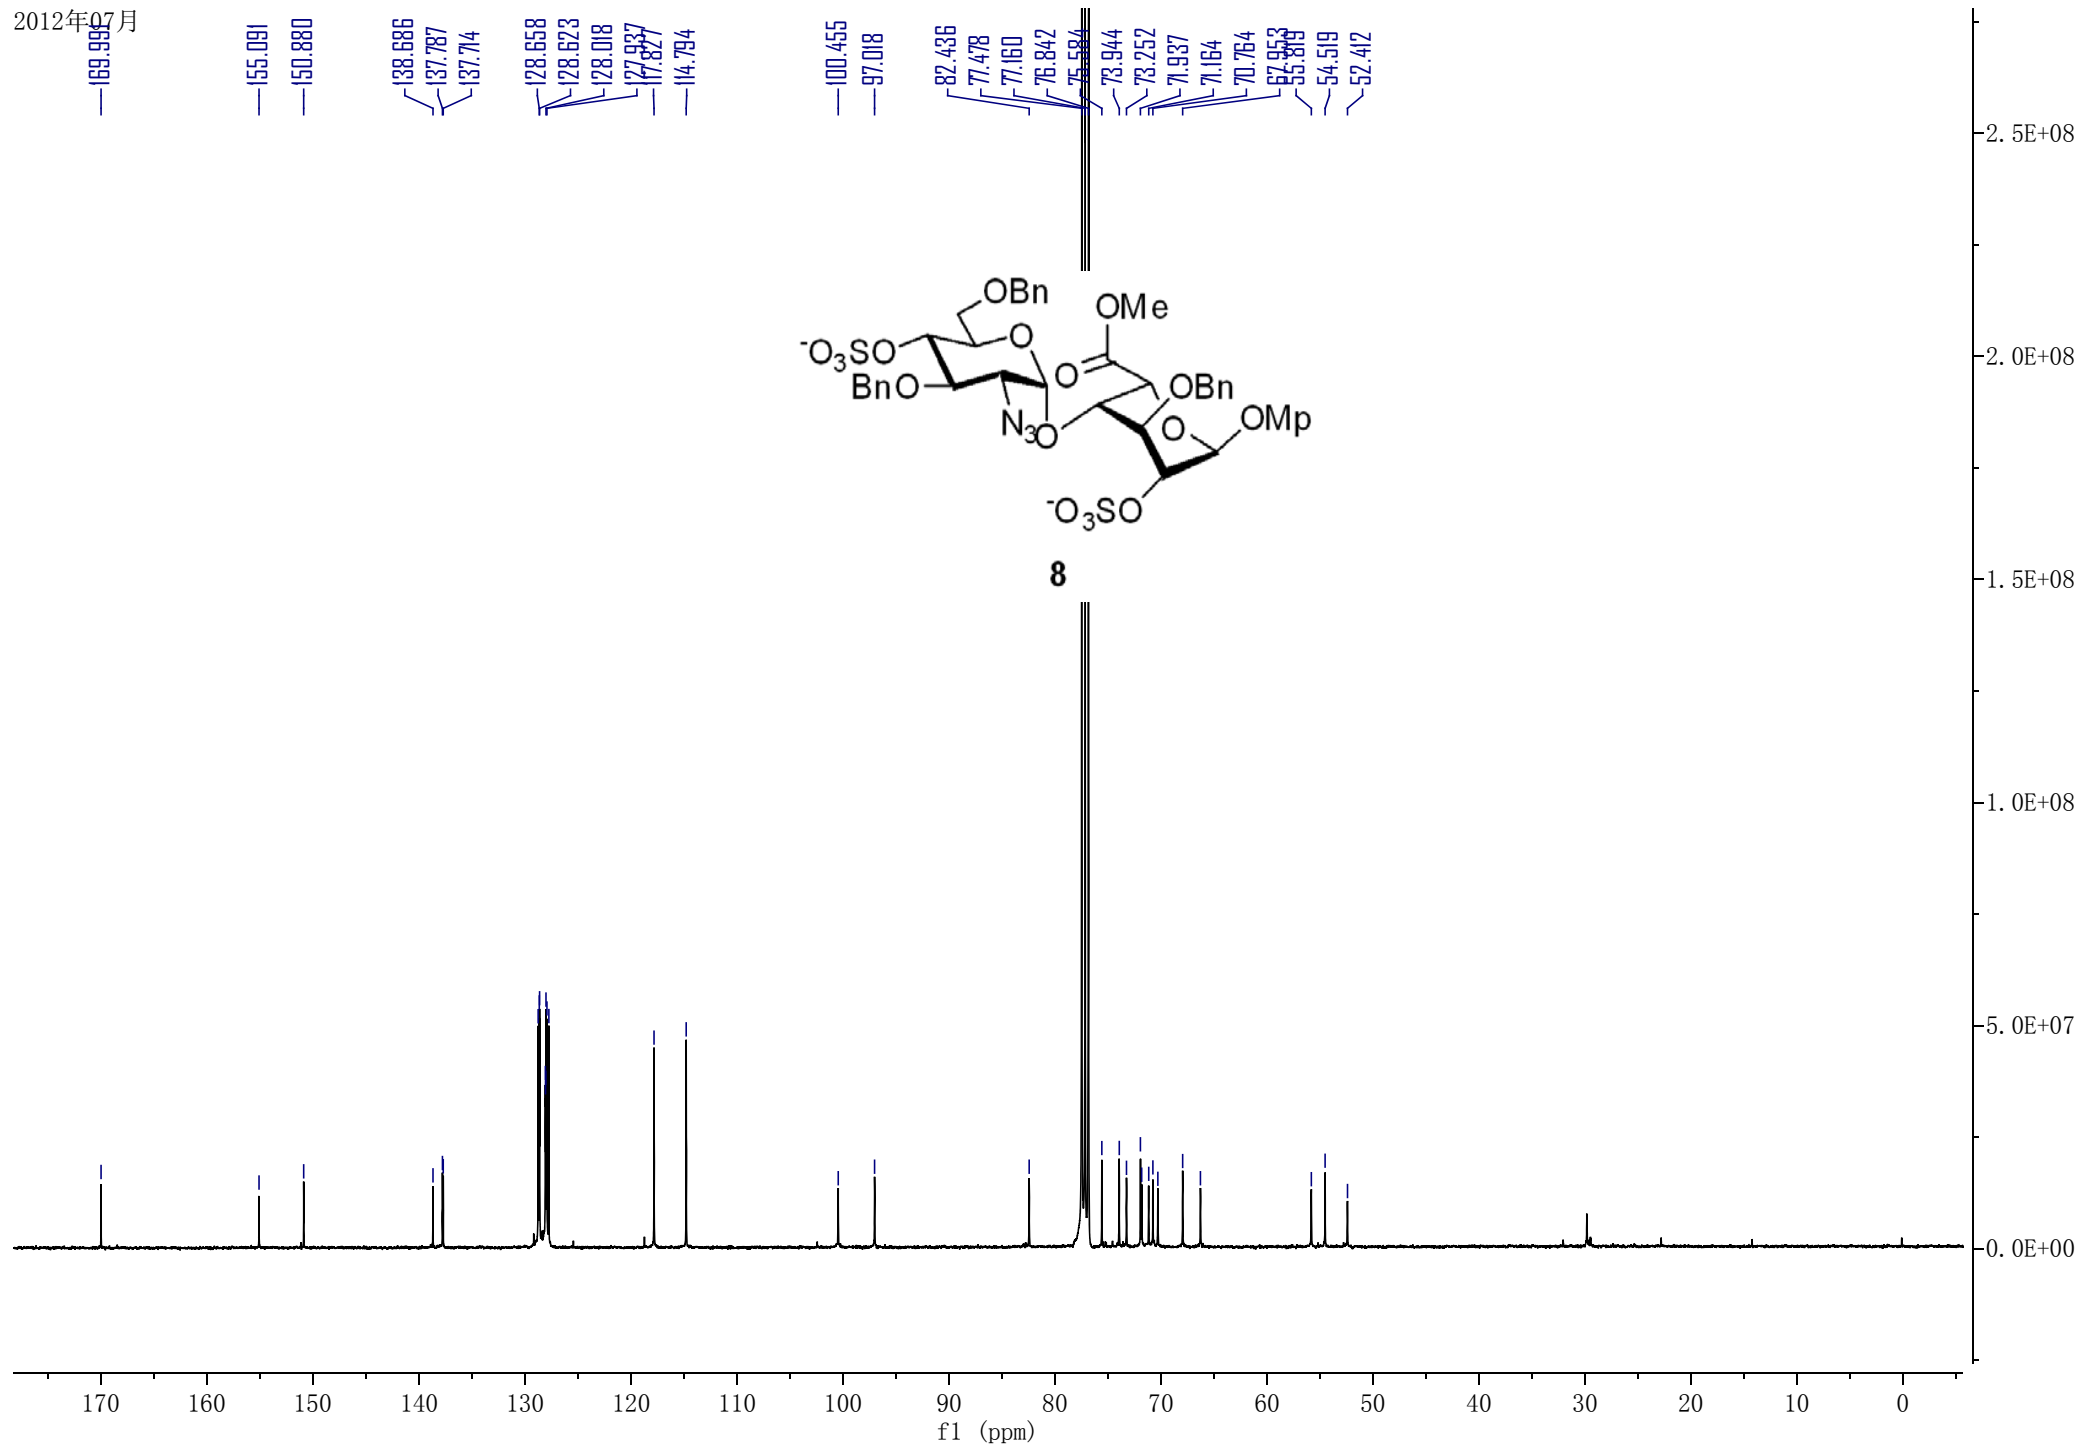

20081120-12-43h

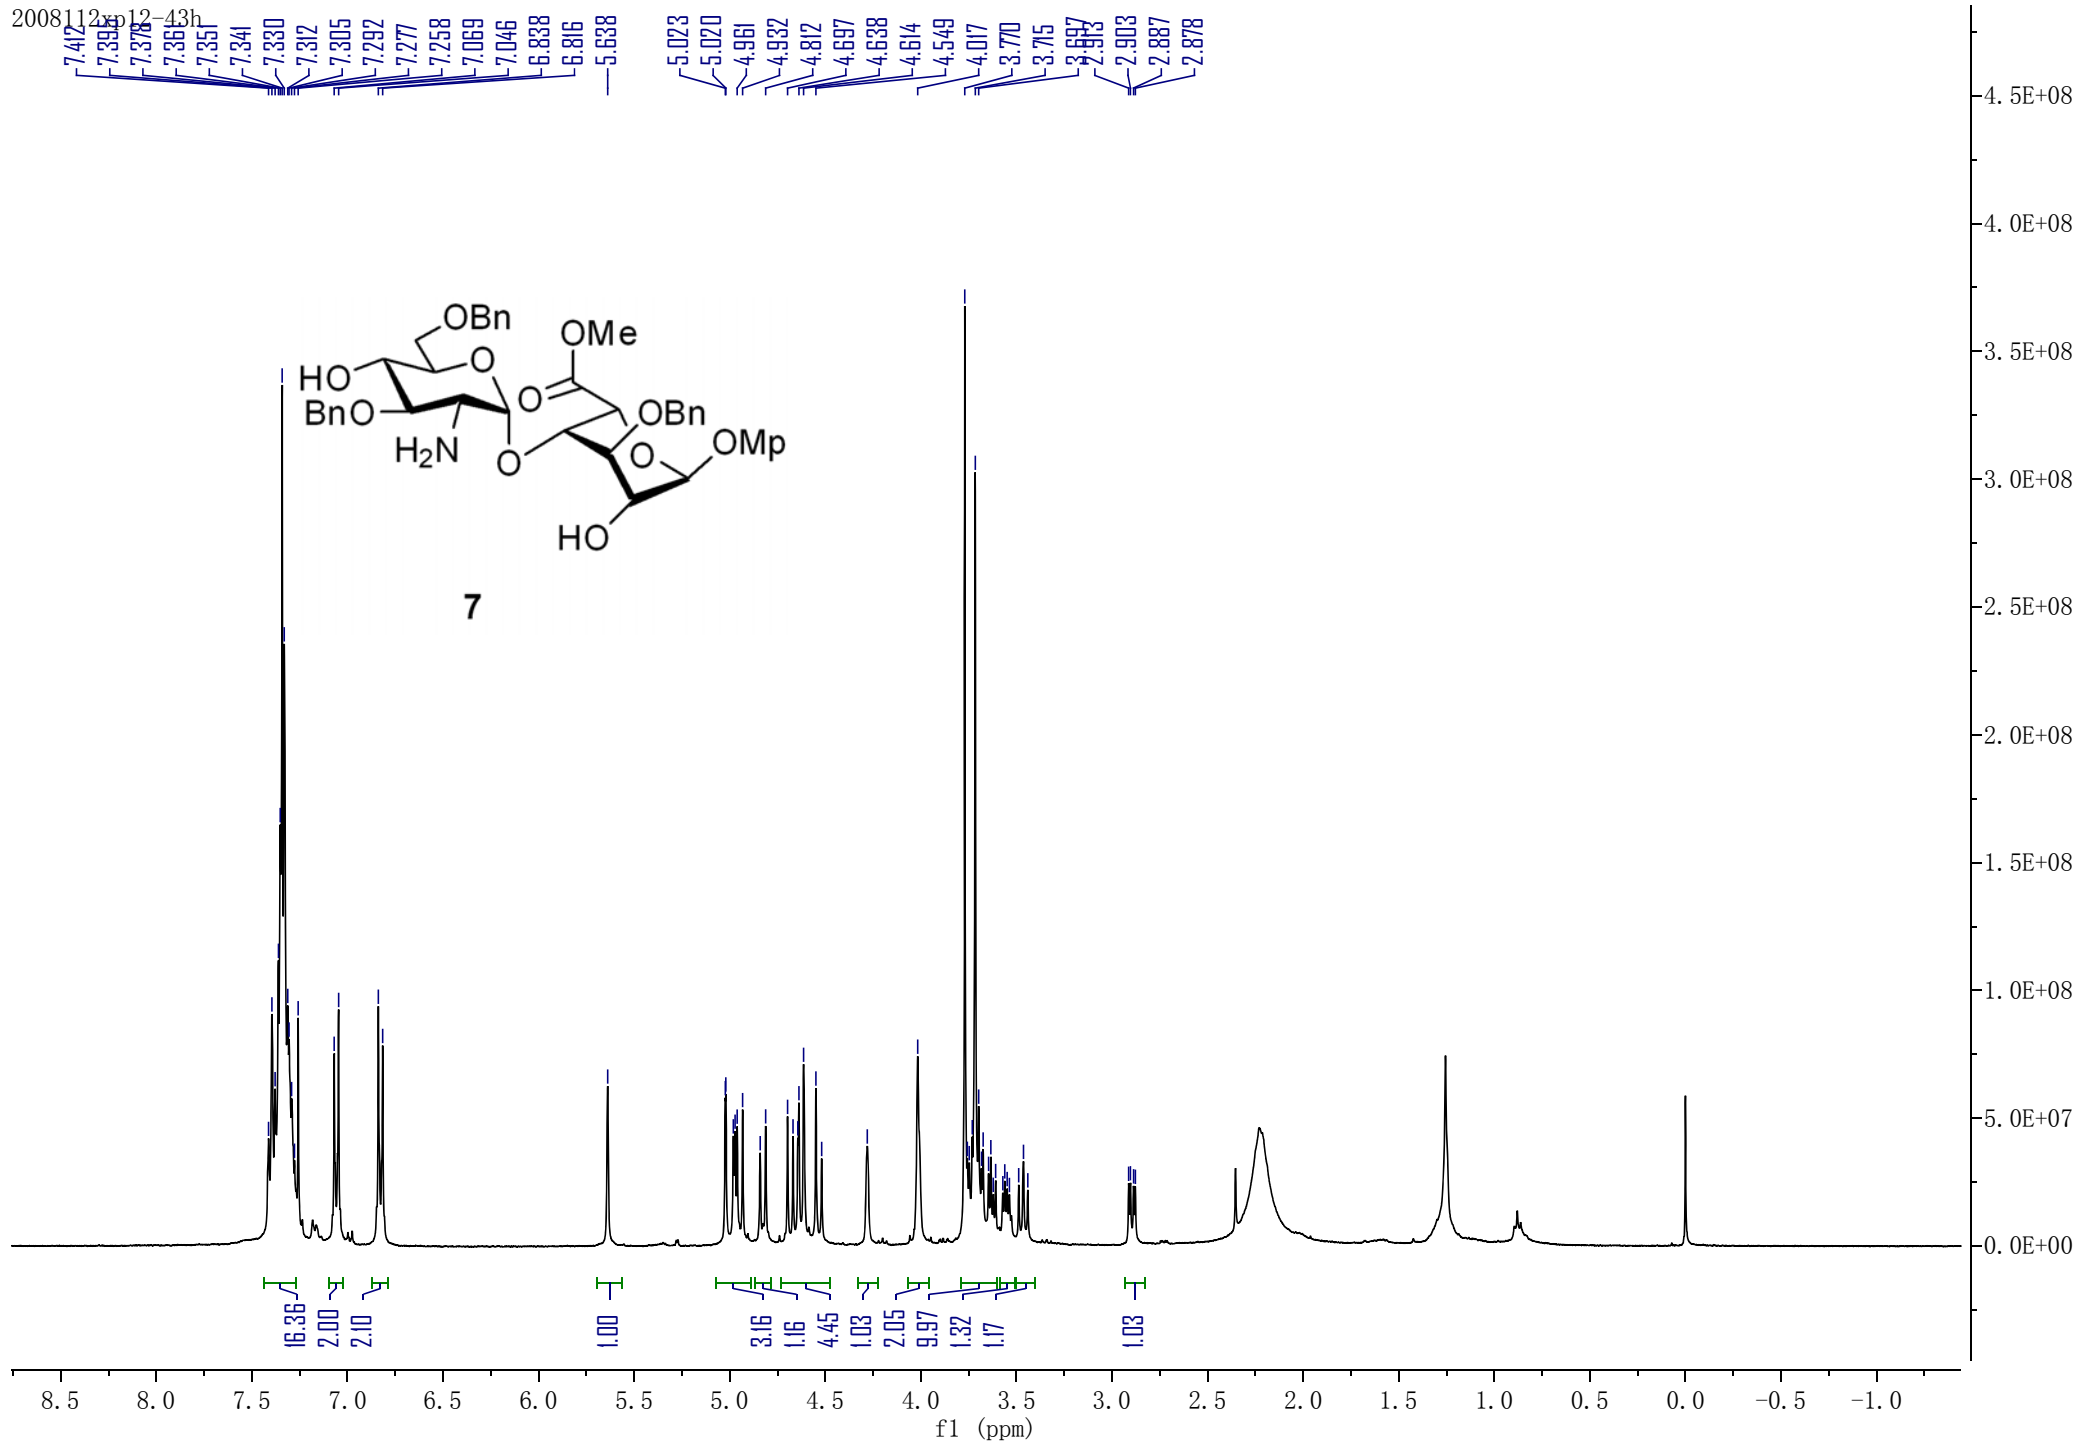

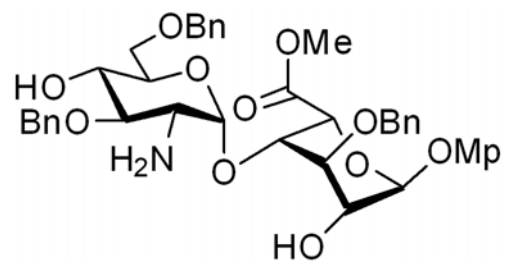

7

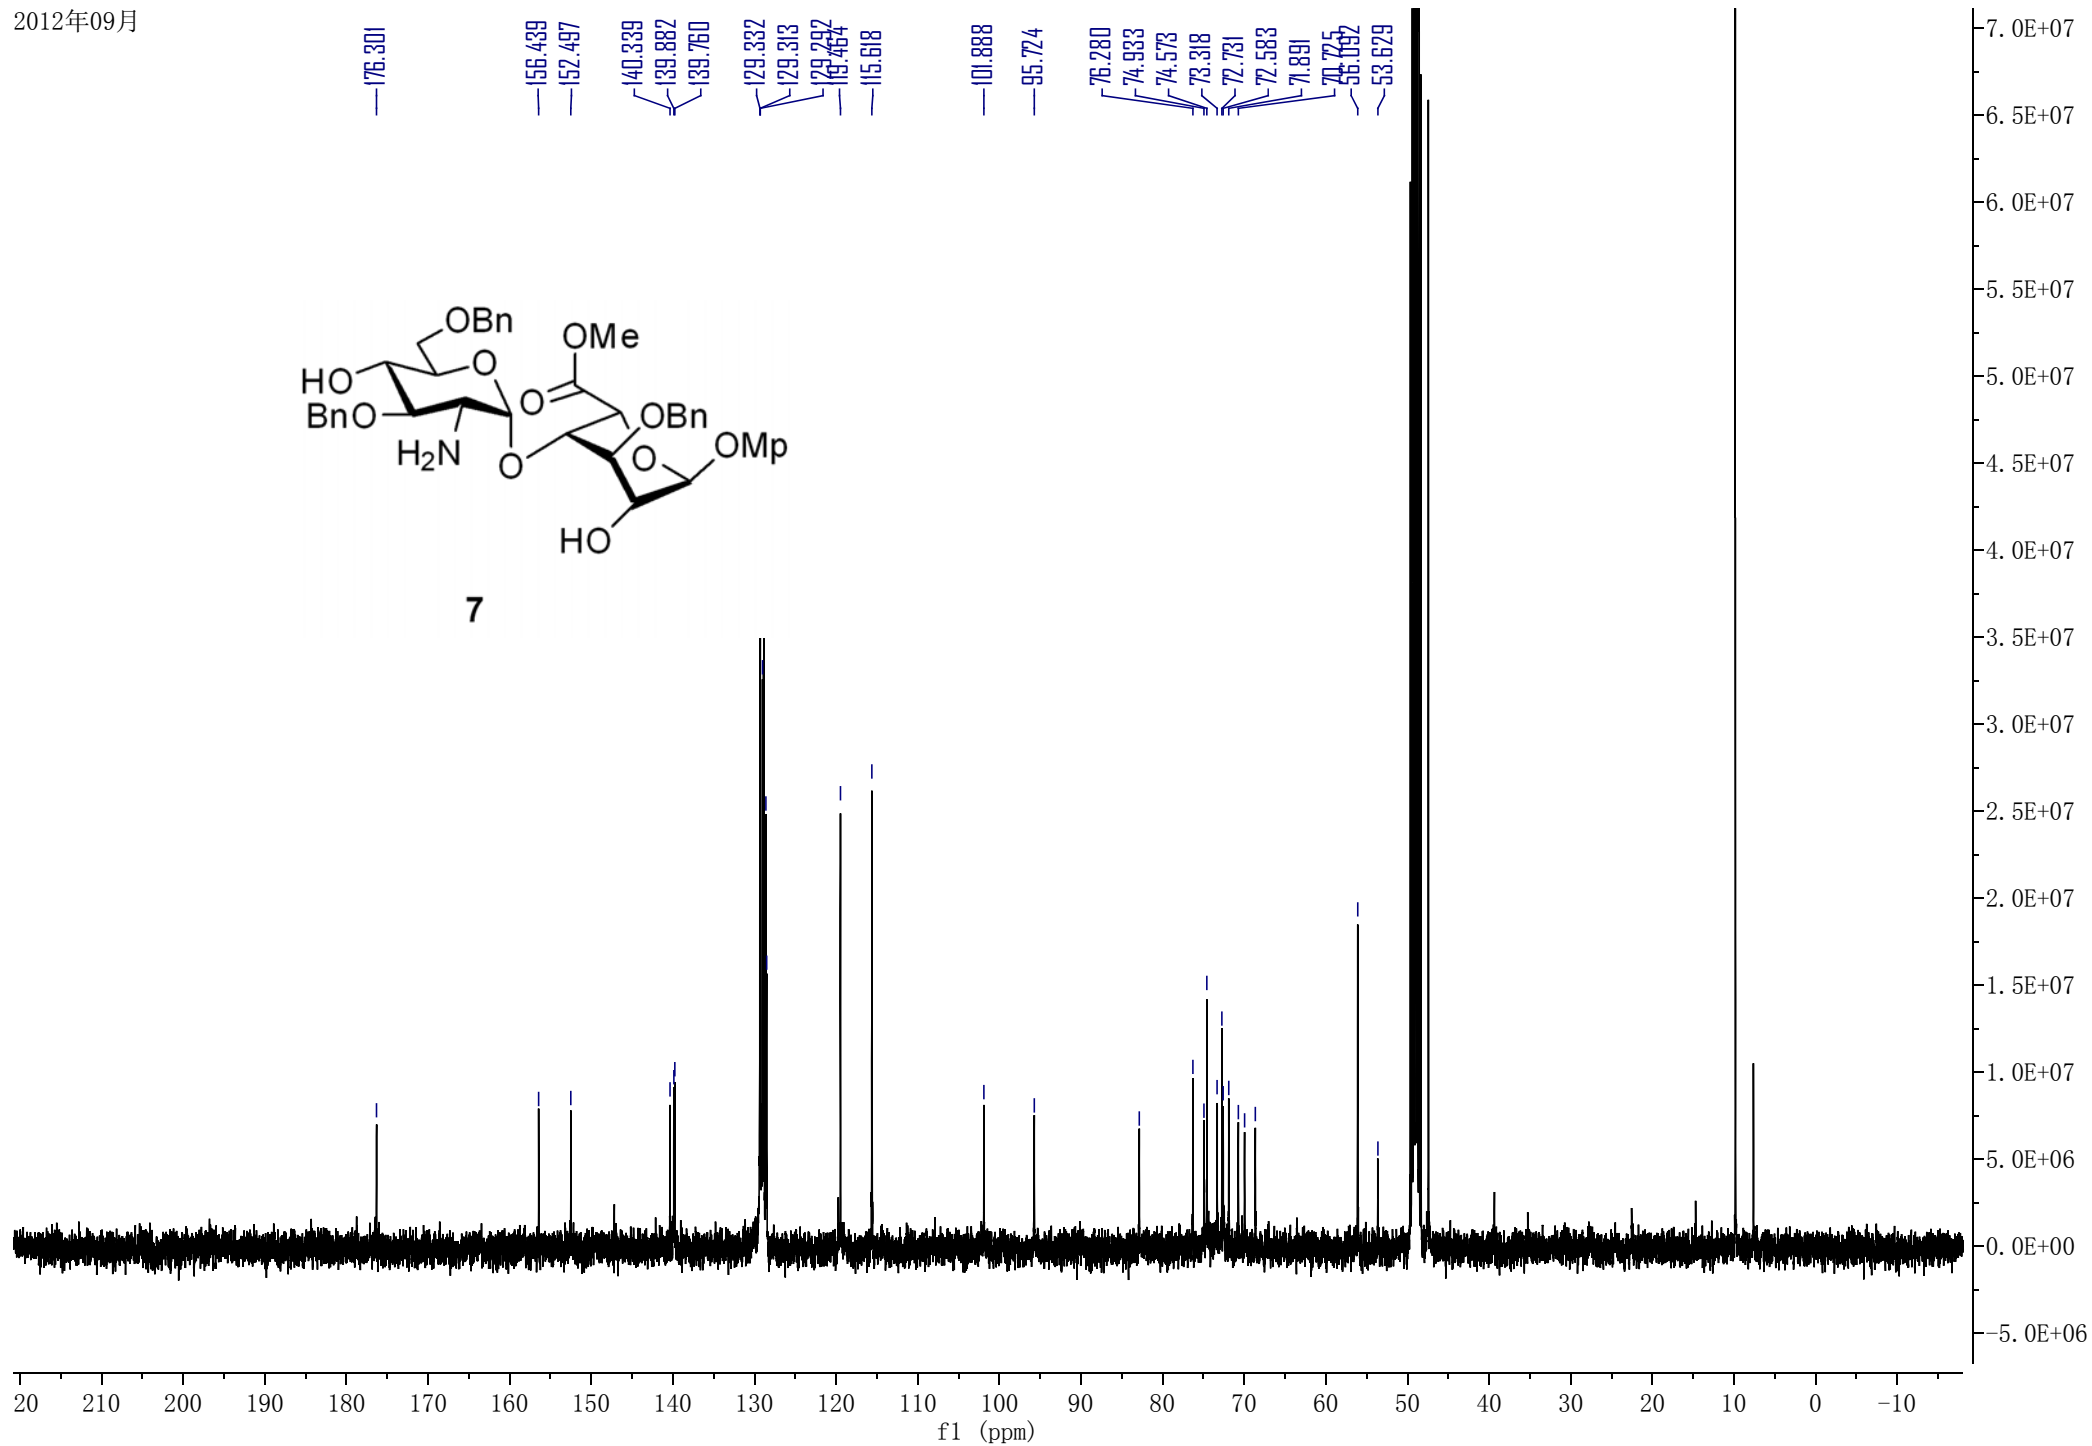

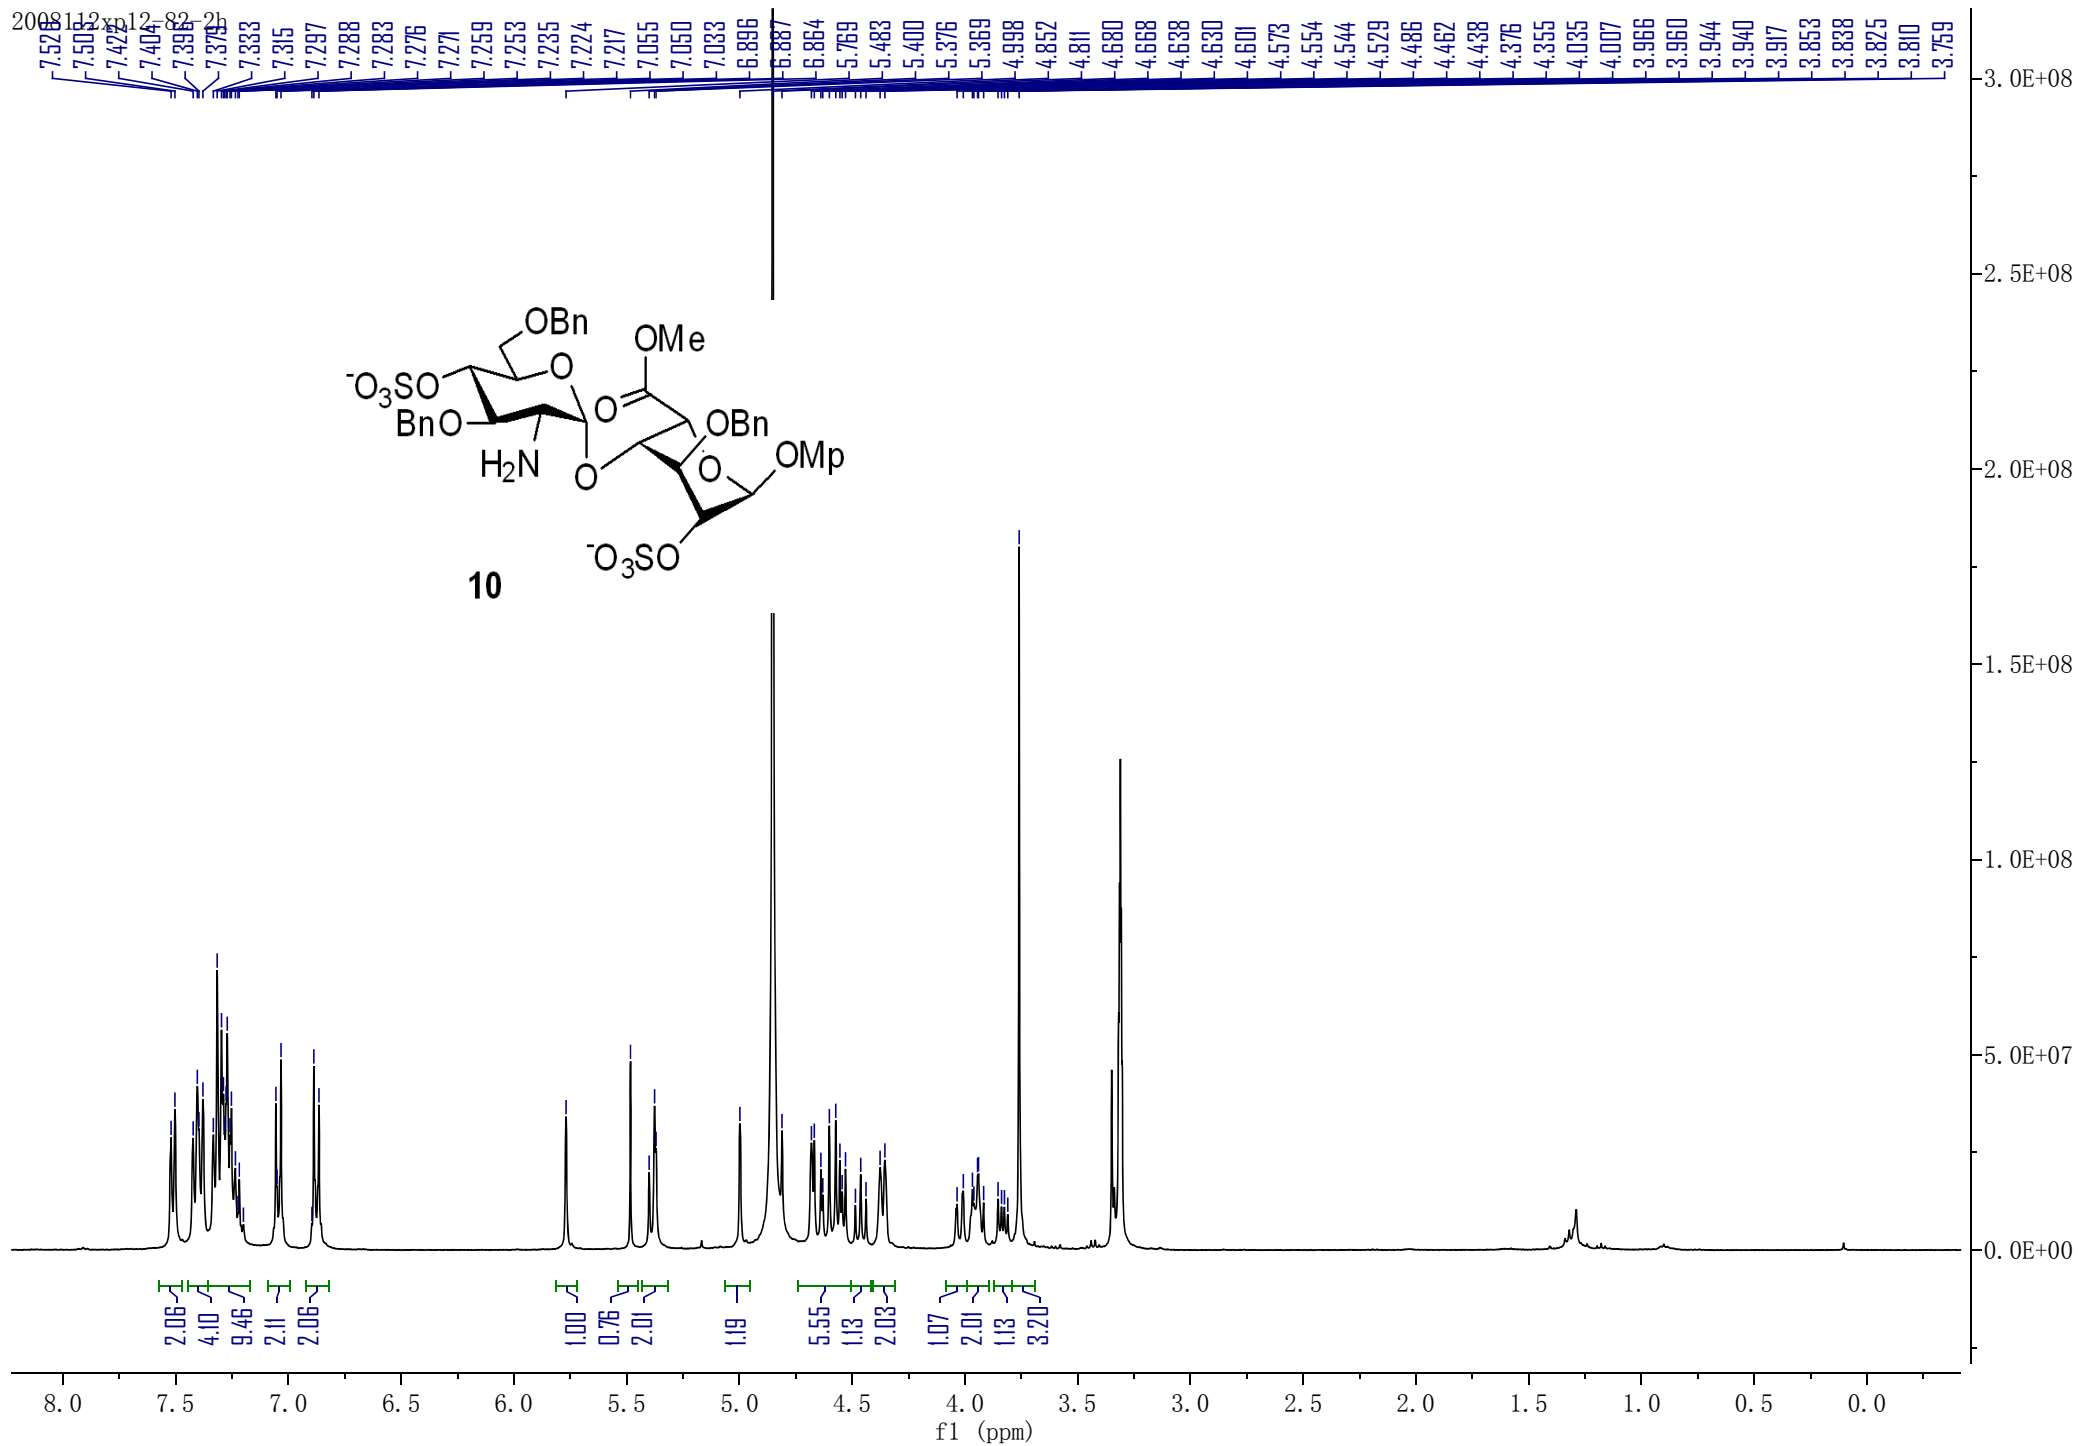

2012年09月

171.125

156.924

151.677

139.847

139.344

138.820

129.292

129.120

129.097

115.807

99.532

92.452

77.984

74.427

73.090

72.875

70.408

69.862

69.264

68.135

56.089

54.834

53.324

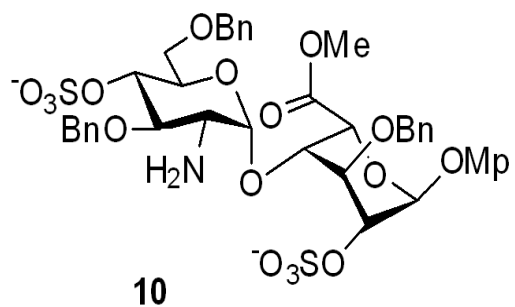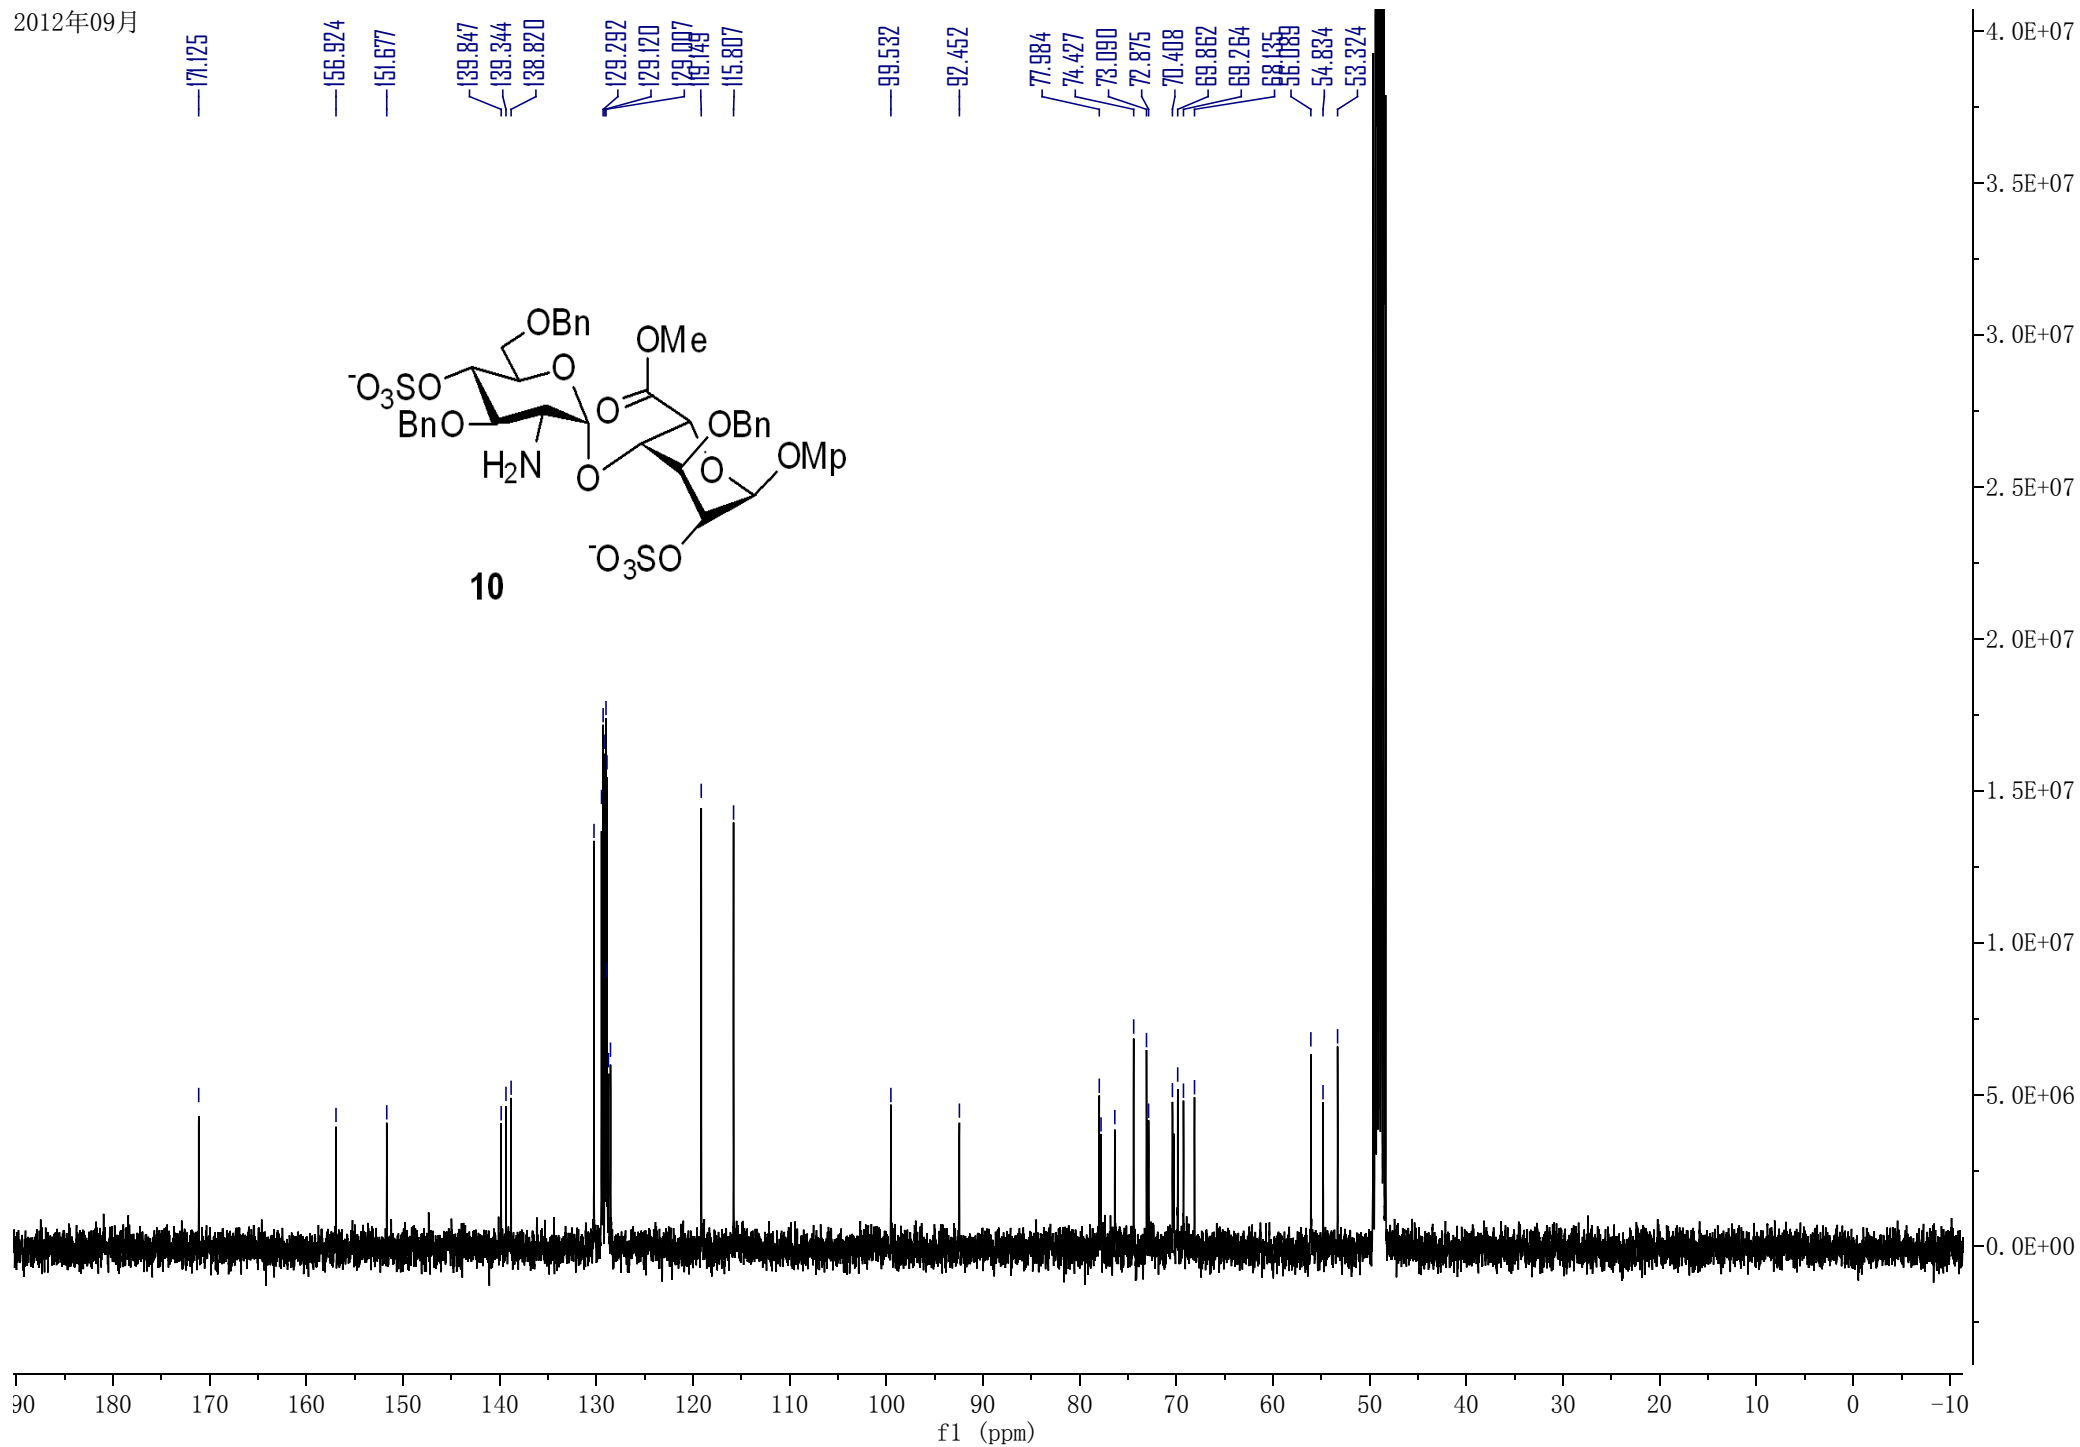



20081123XP1286A

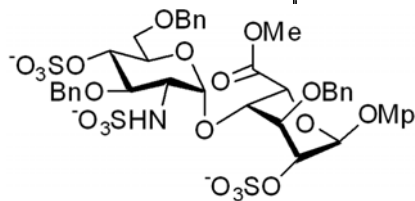

9

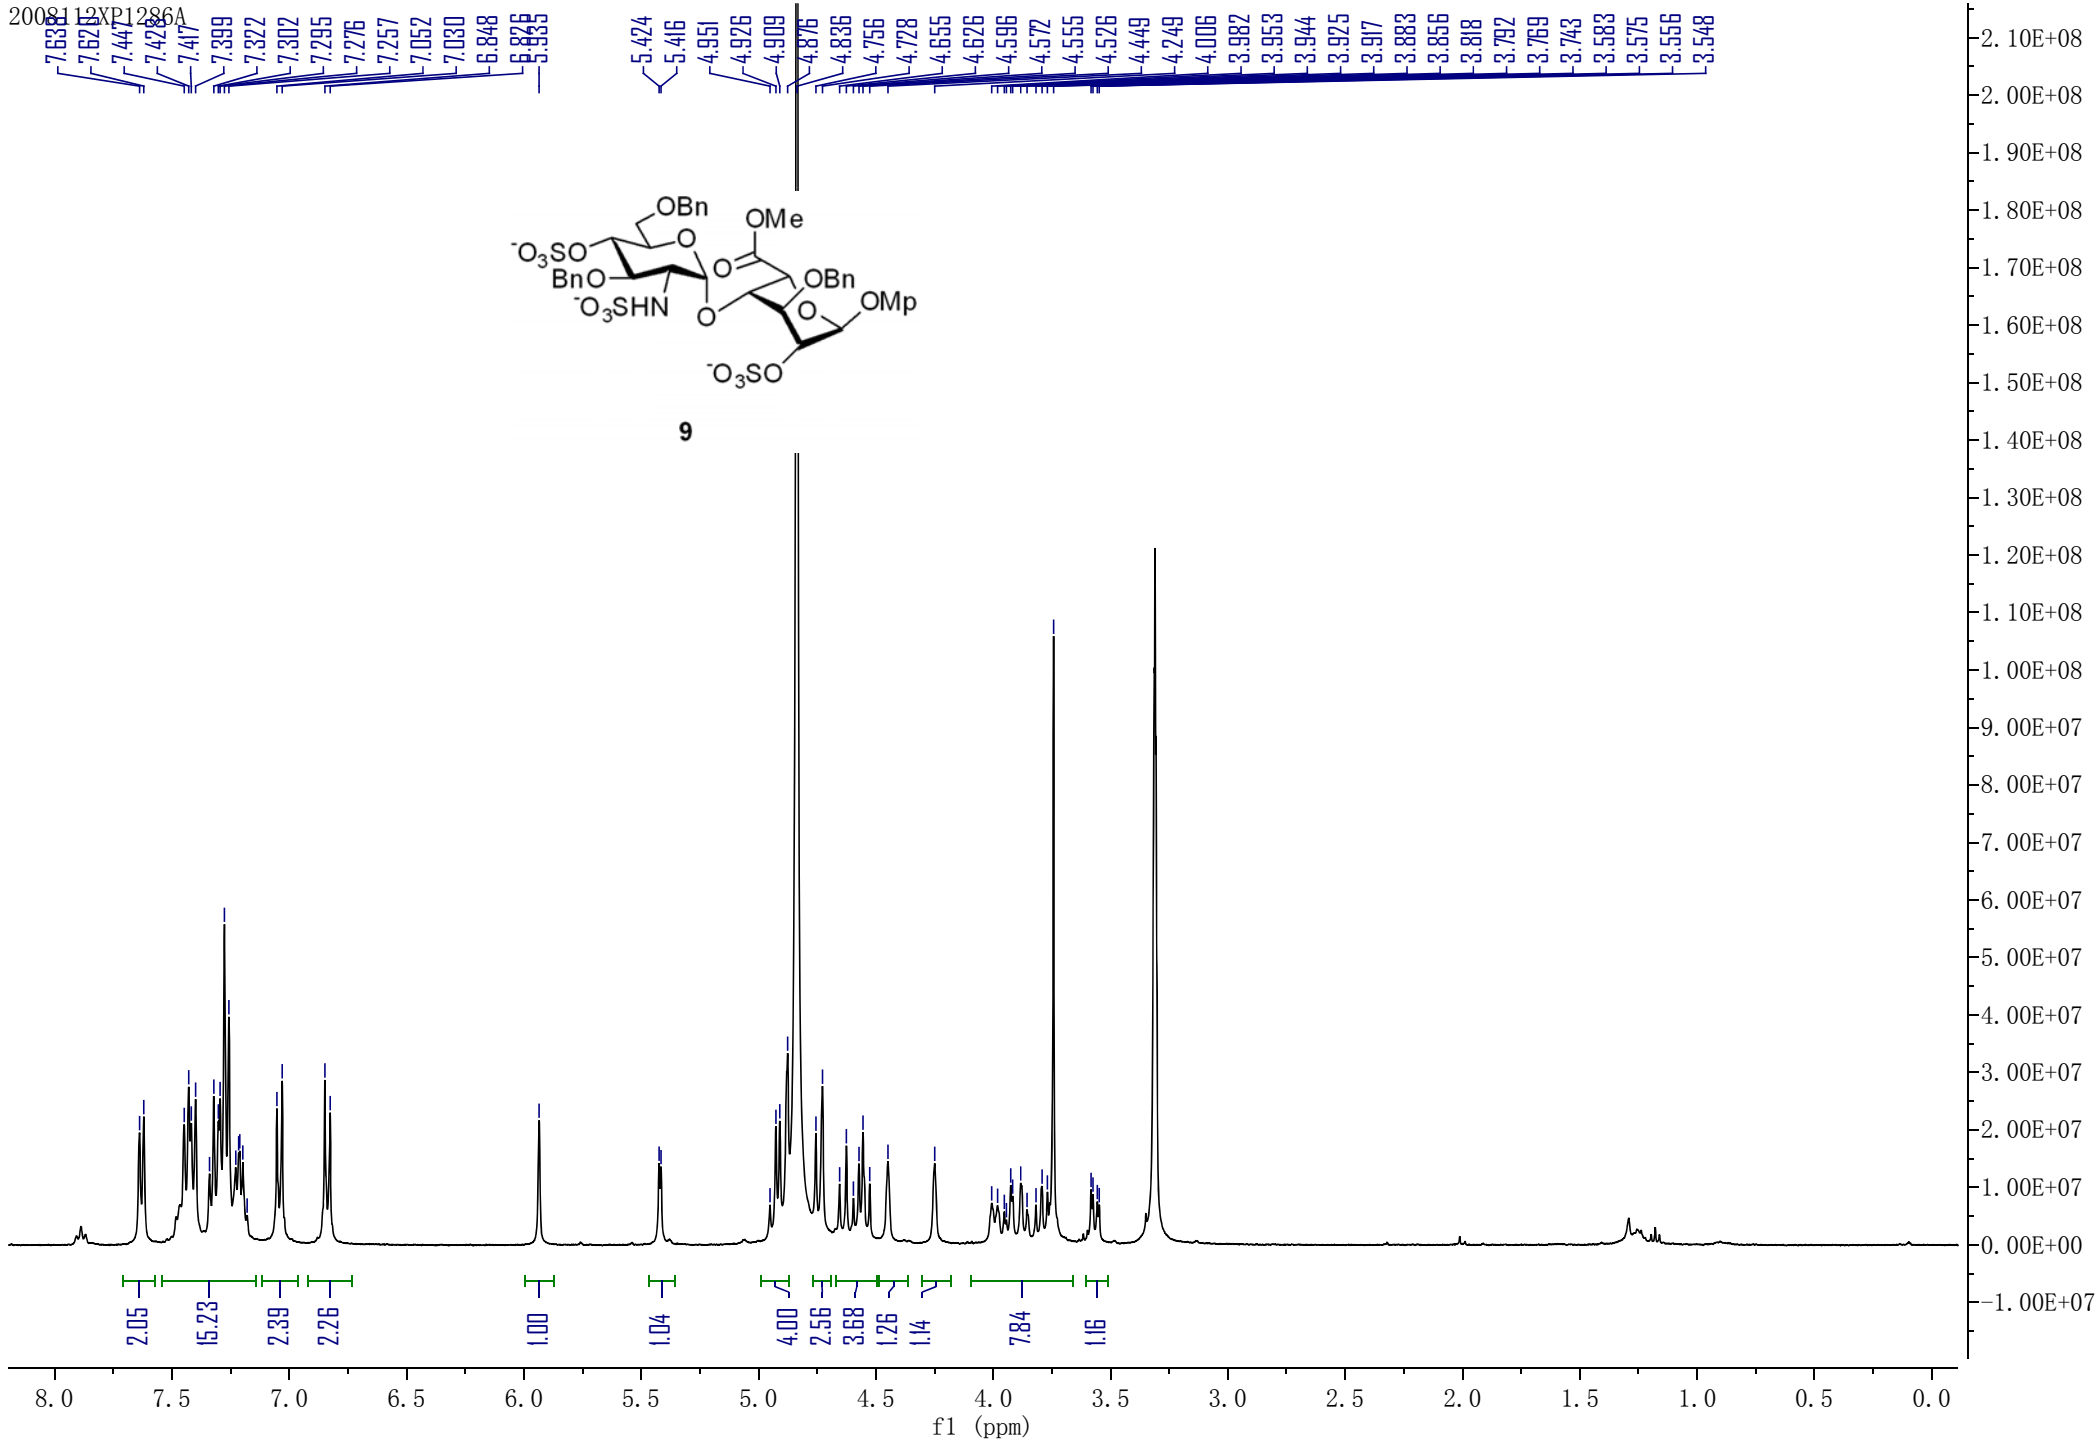

2012年09月

173.471

156.668

151.986

149.813

140.174

140.053

139.688

138.712

129.250

129.183

129.164

129.122

119.276

115.755

115.672

99.527

98.869

79.244

77.432

75.321

74.648

74.462

74.198

73.165

72.299

72.117

68.540

58.774

56.075

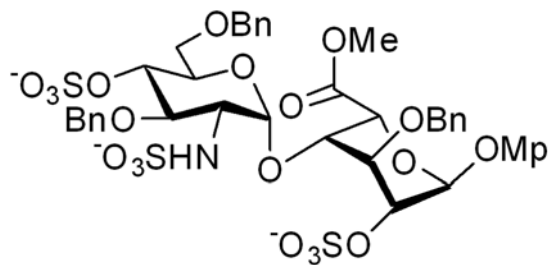

9

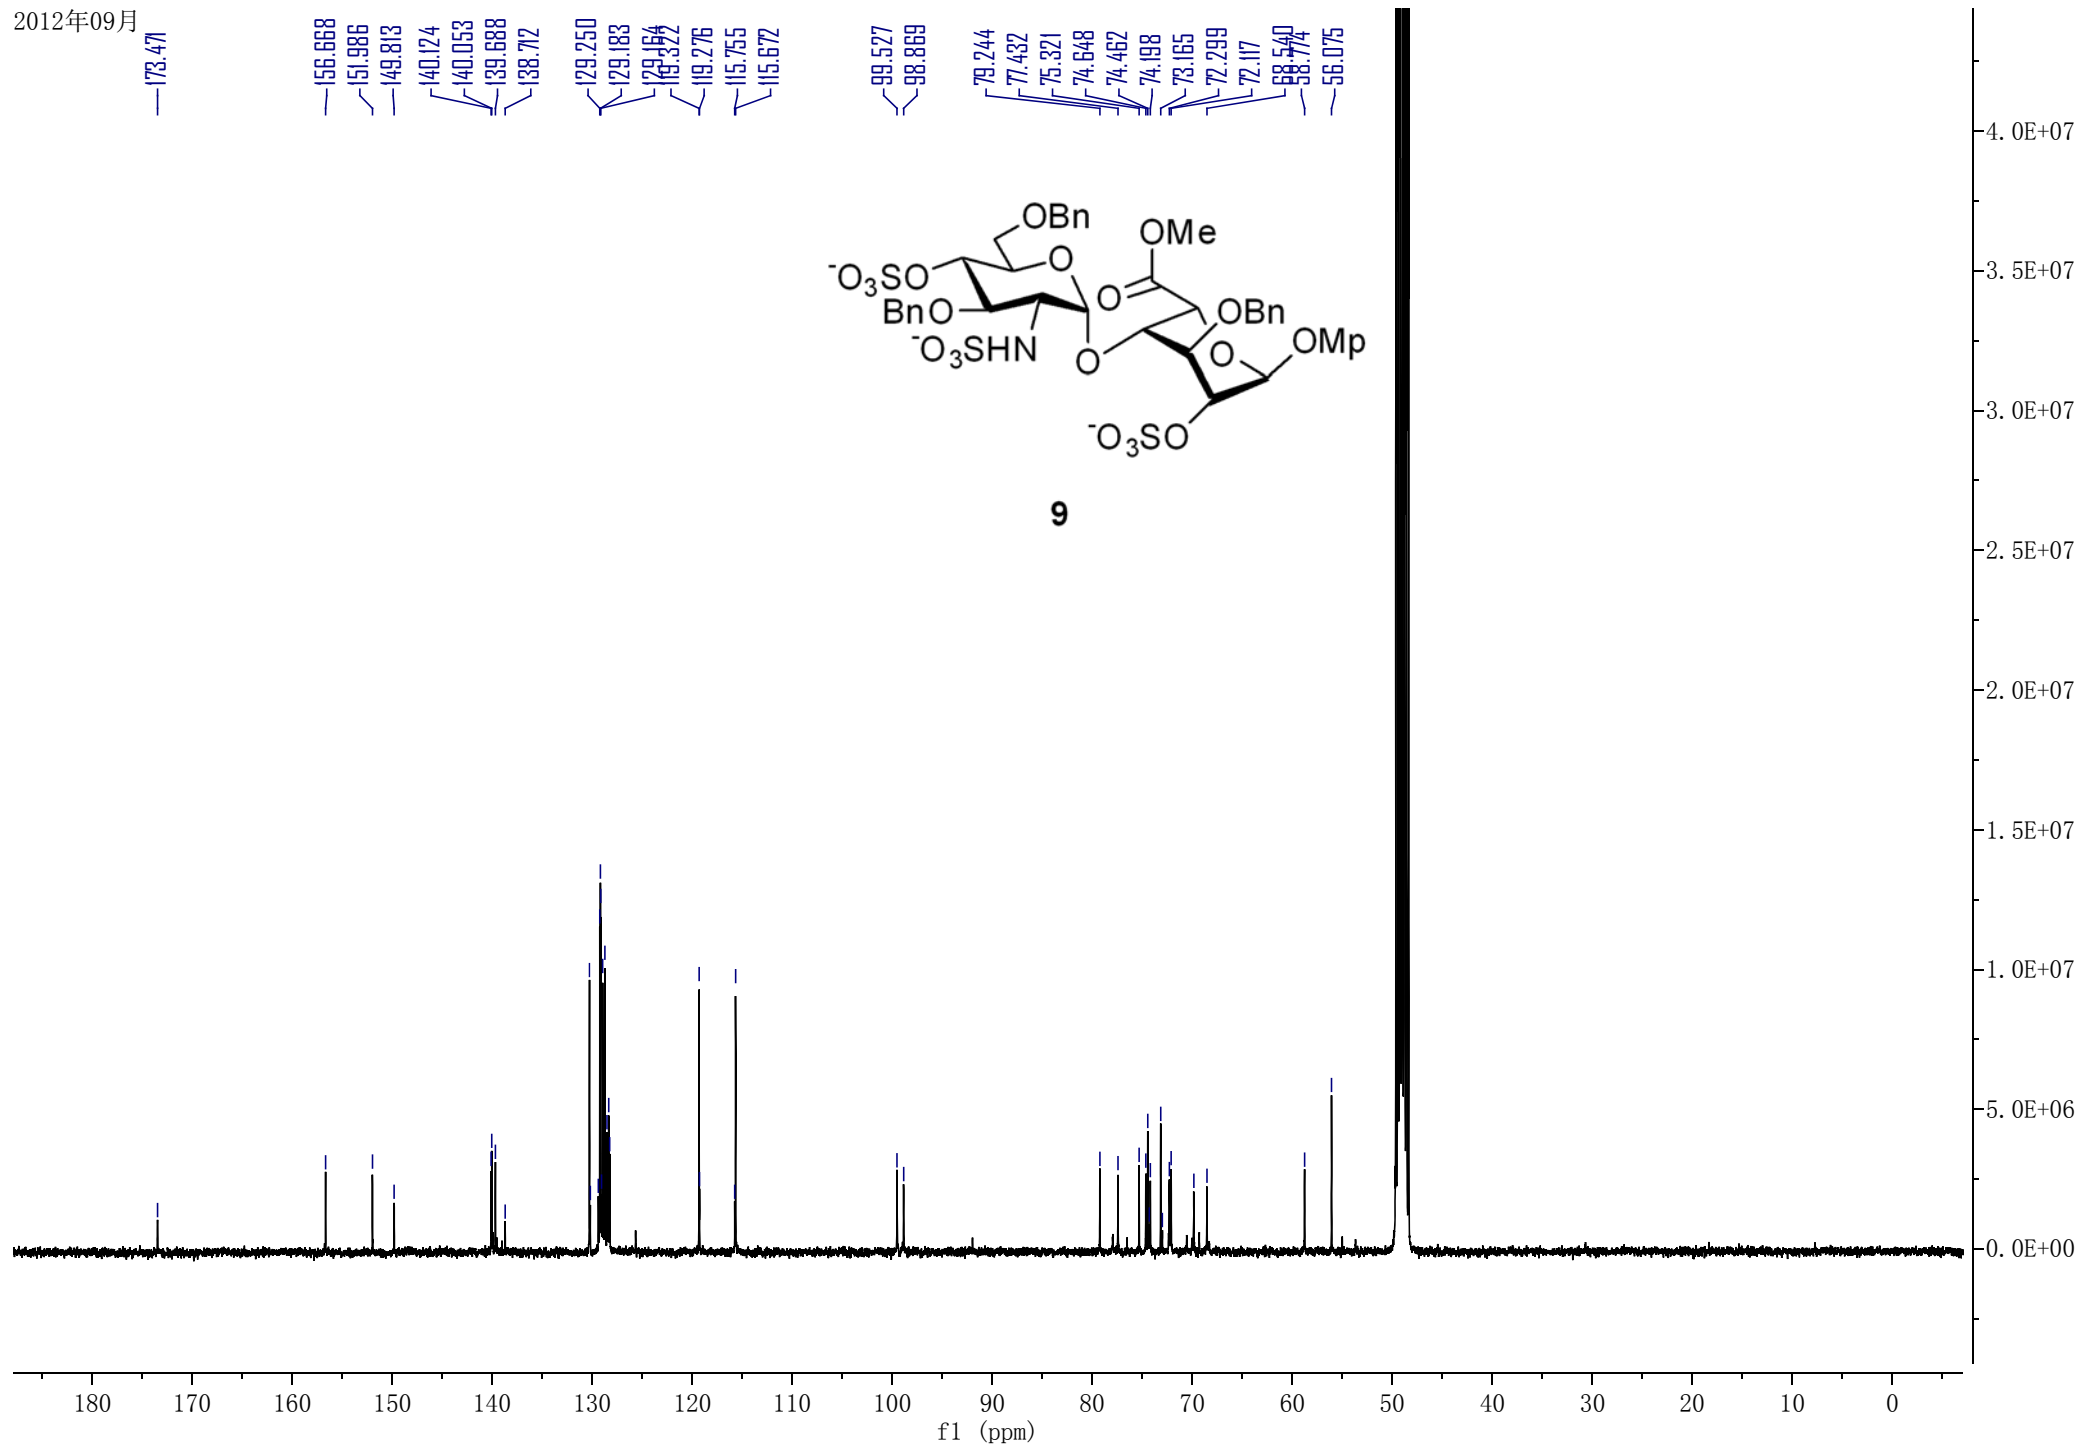

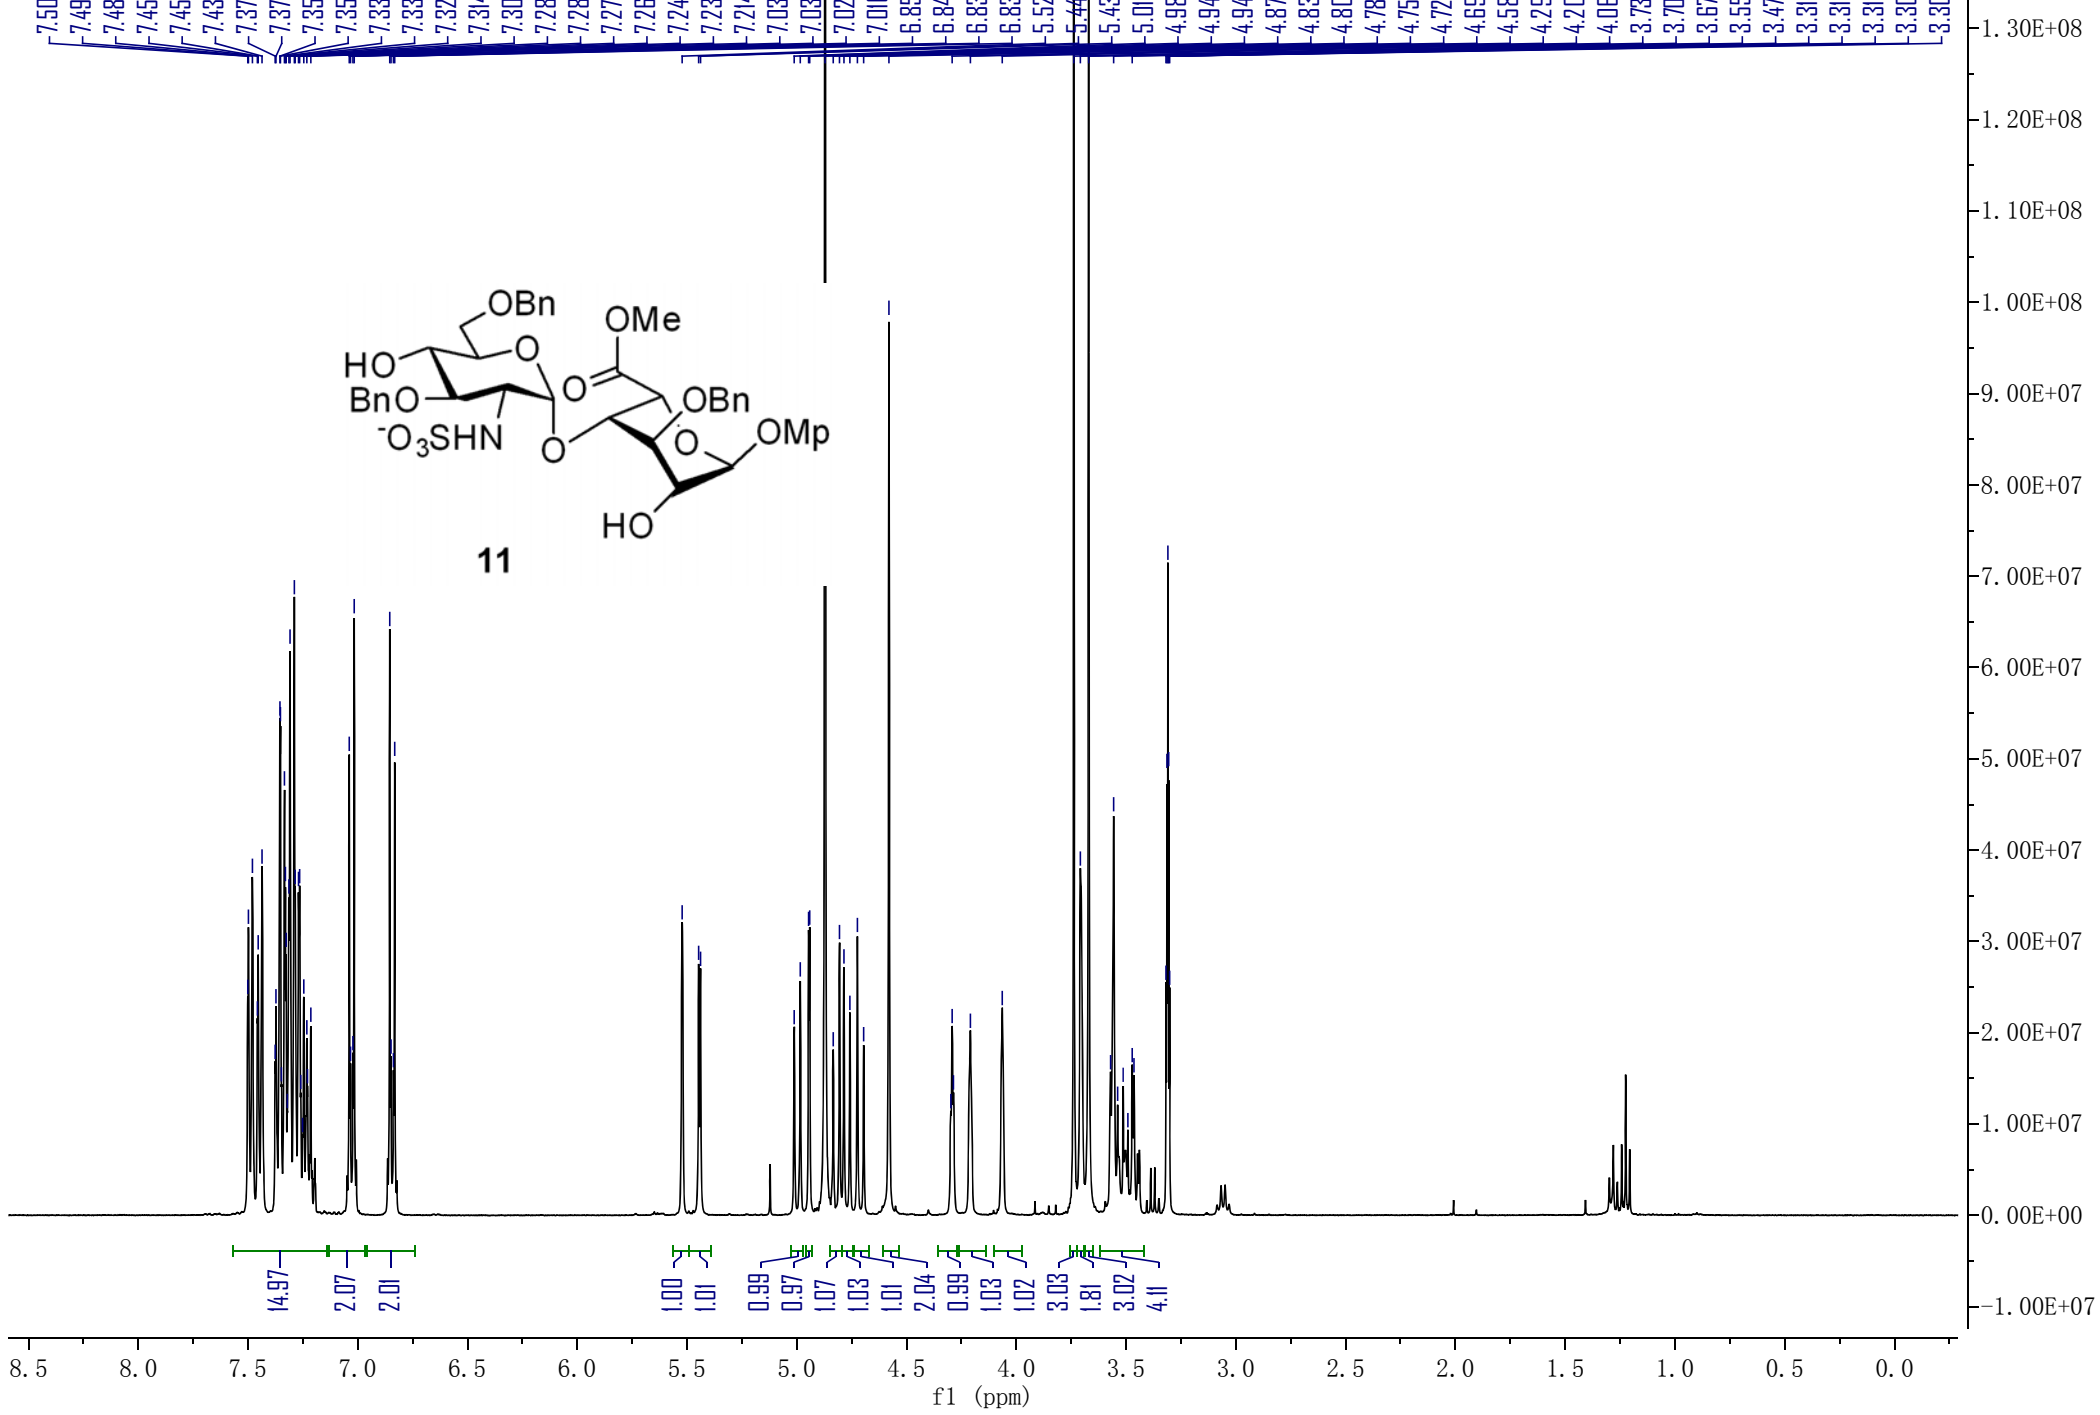

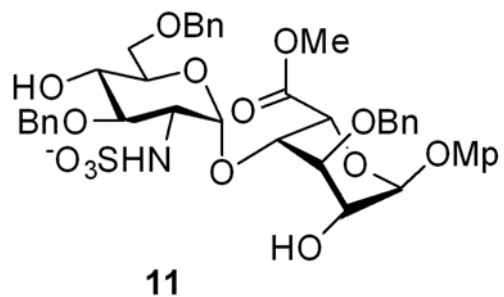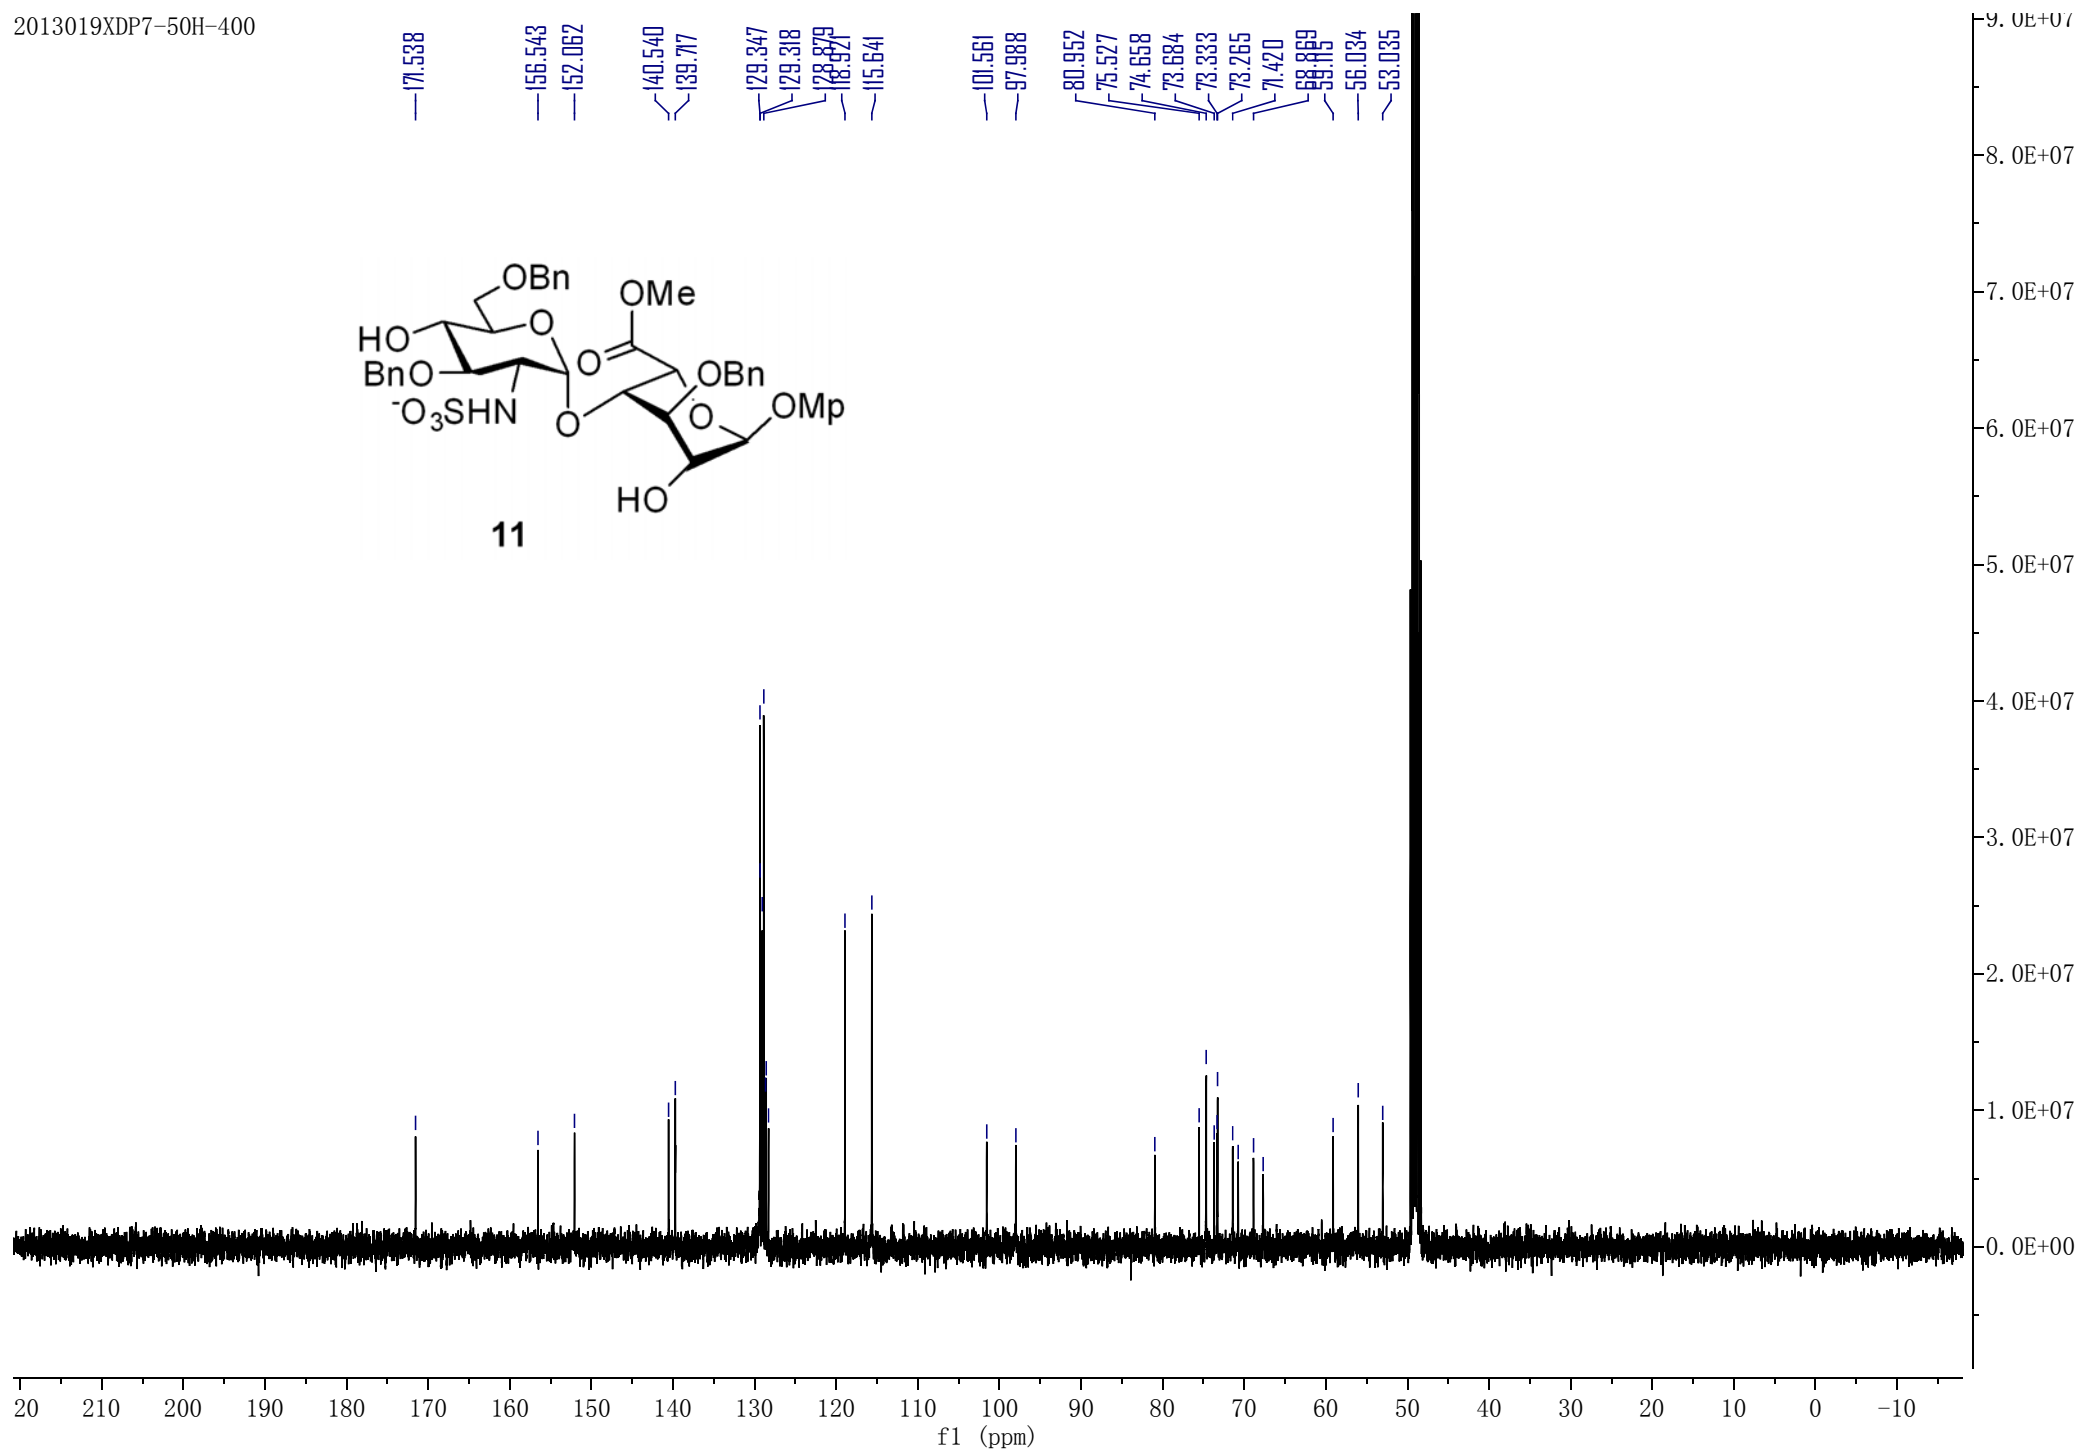

2008112 x 13 50

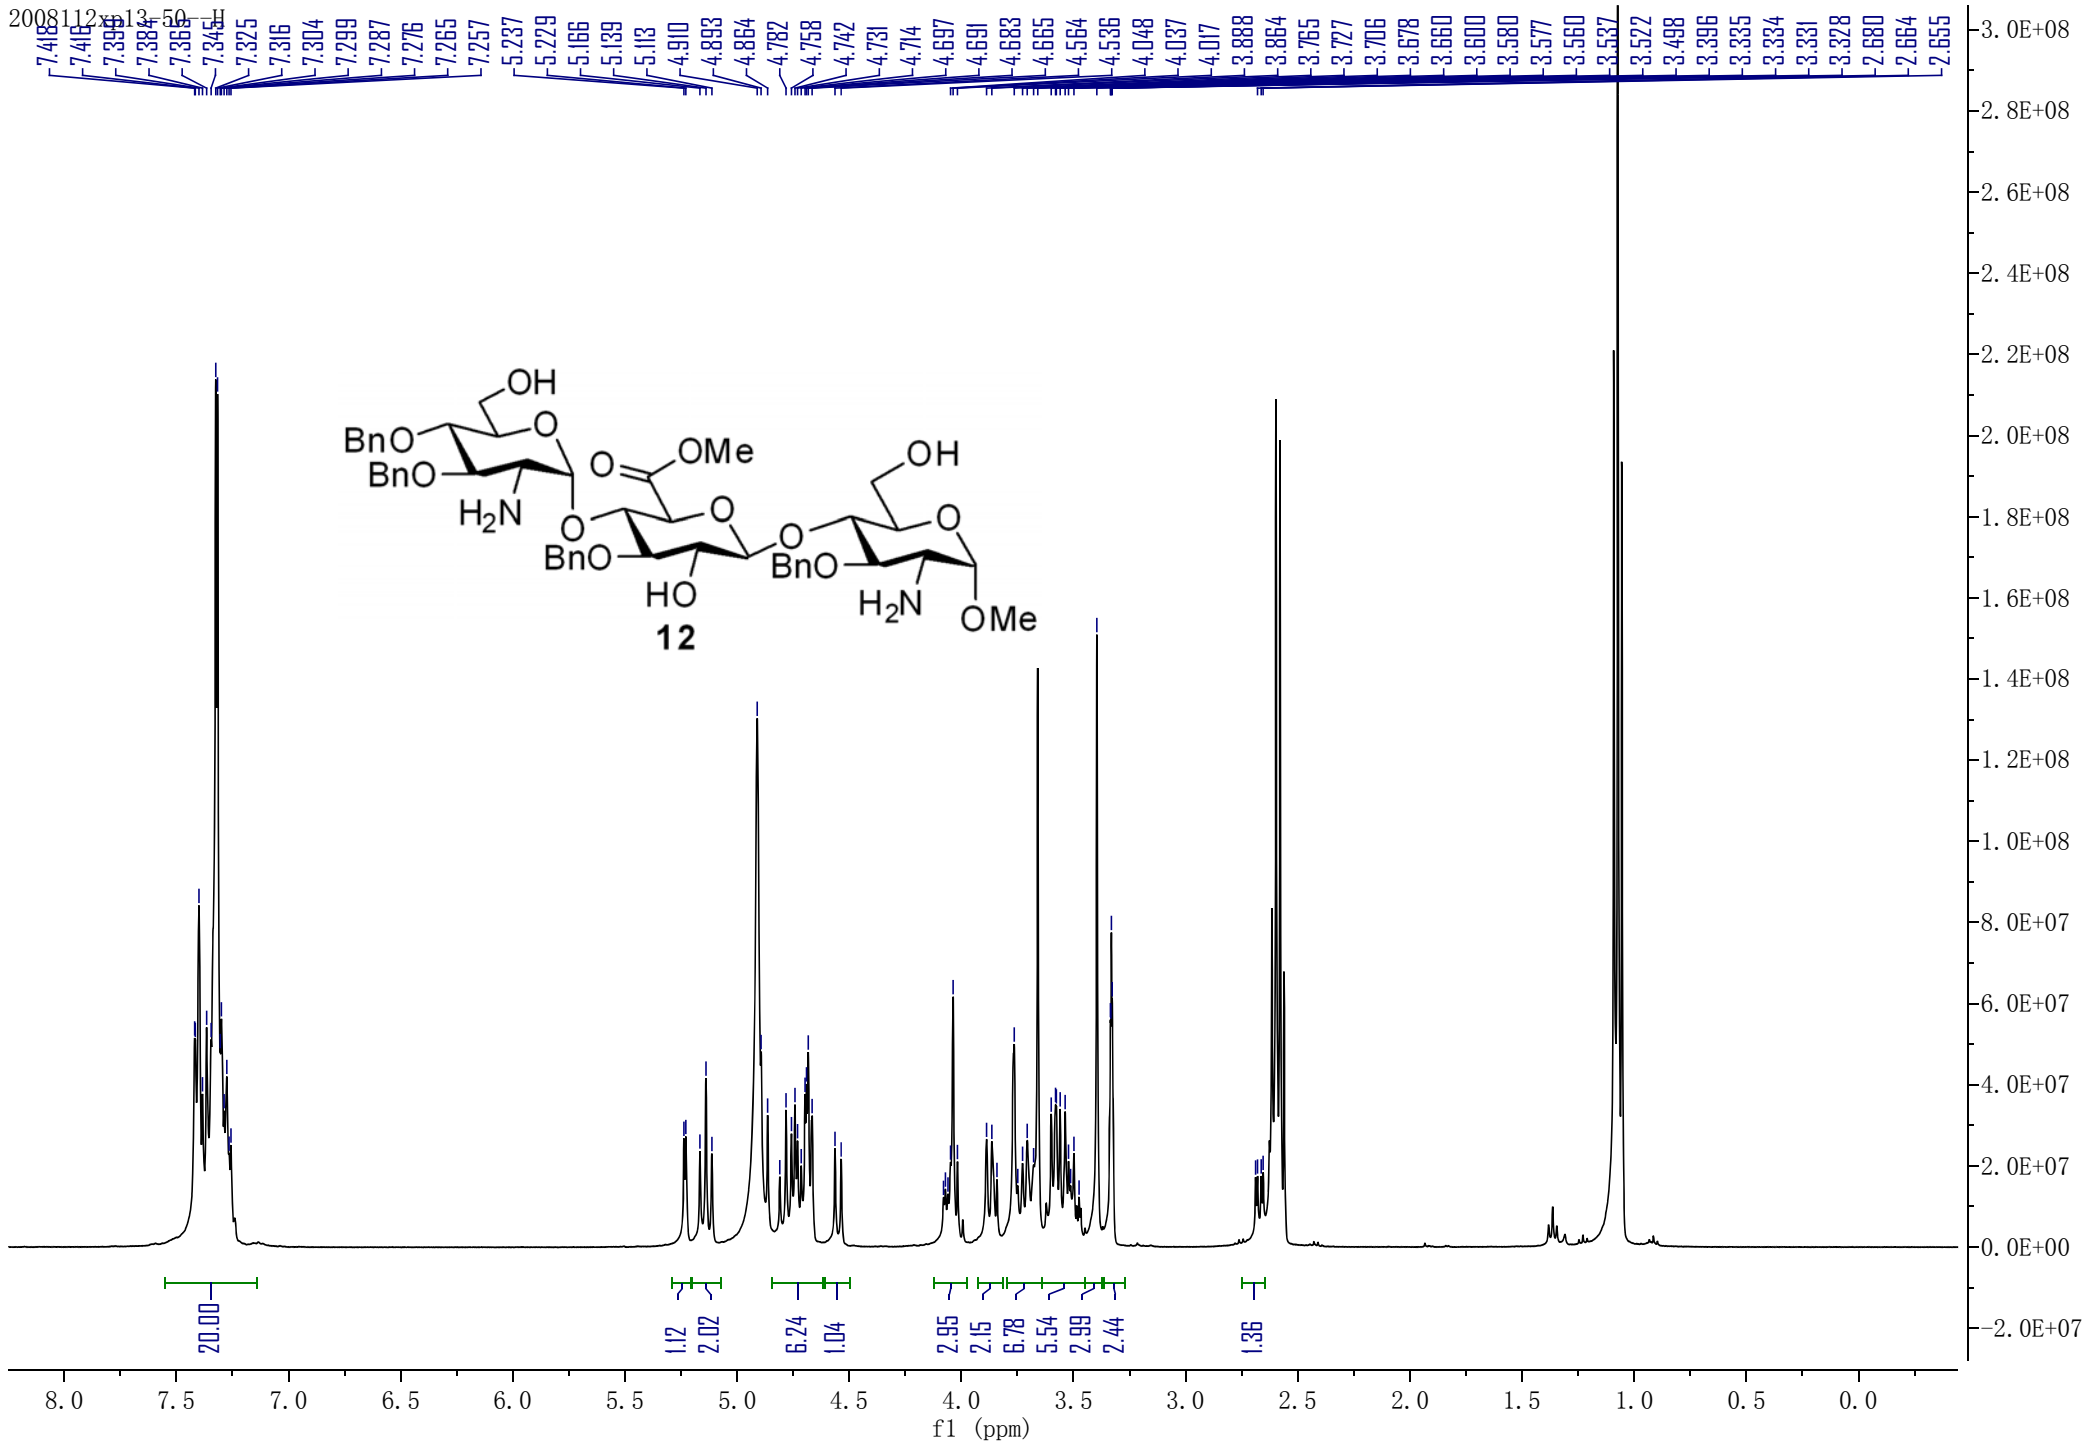

2012年11月

170.448

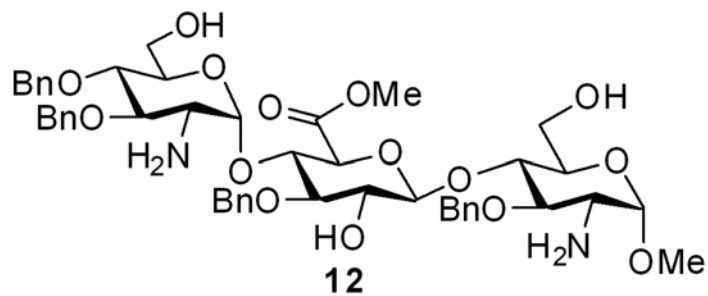

140.351  
139.991  
139.962  
139.865  
129.670  
129.453  
129.405  
129.384  
129.361  
128.999  
128.699  
104.683  
101.132  
100.841  
83.673  
78.982  
76.346  
76.266  
76.188  
75.603  
75.547  
74.261  
73.031  
61.248  
56.926  
56.427  
55.503  
53.084

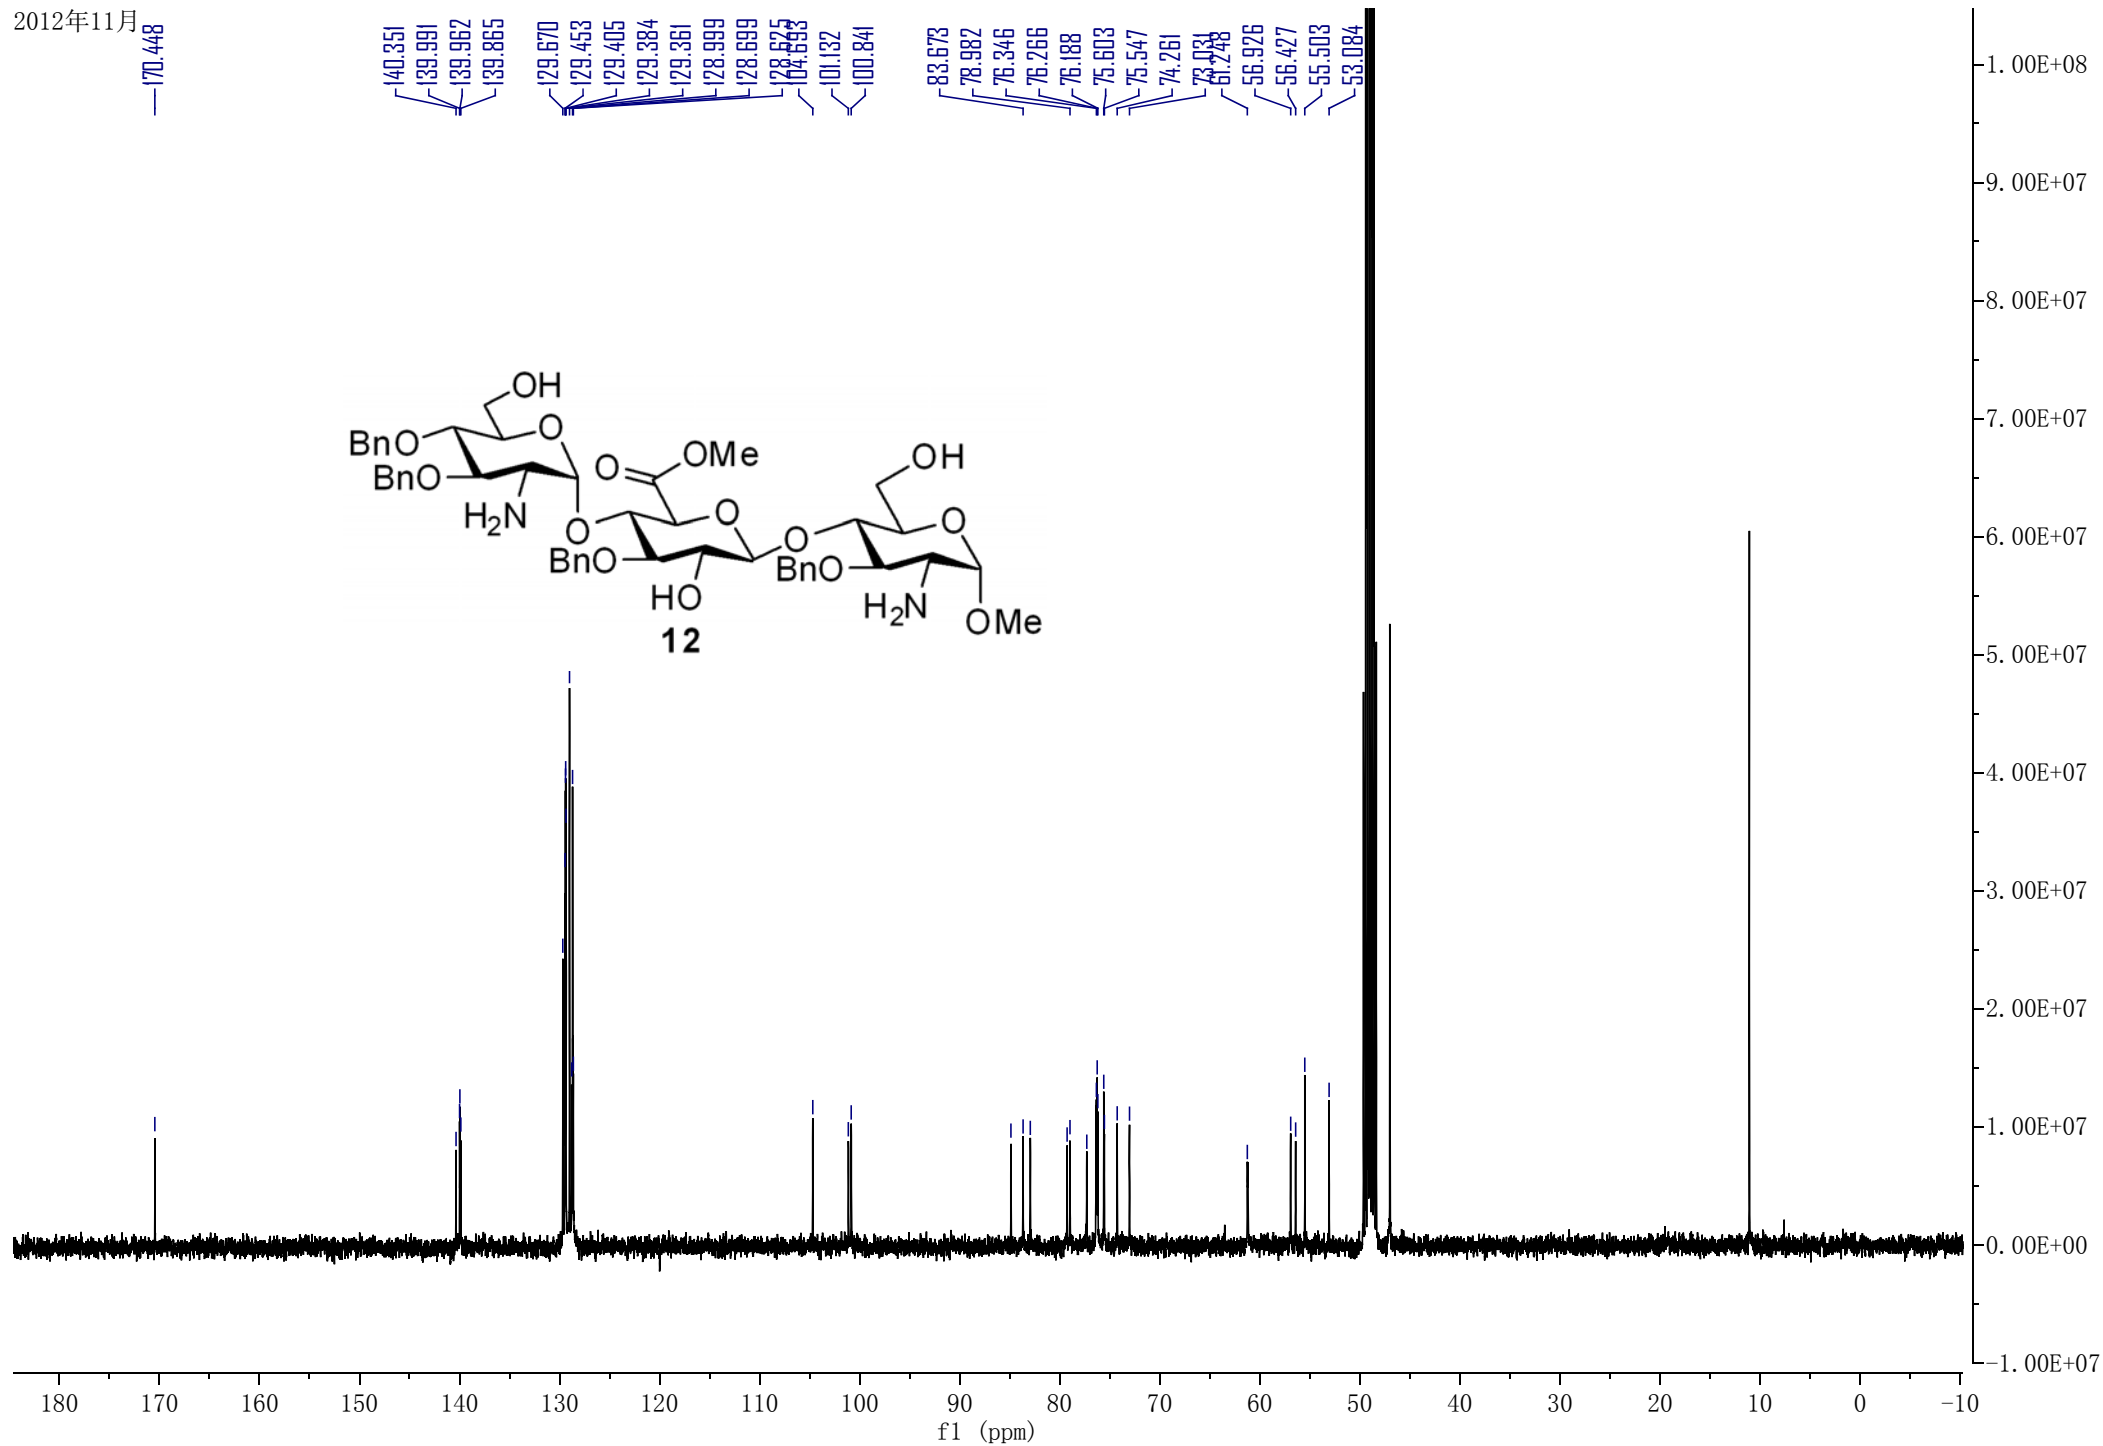

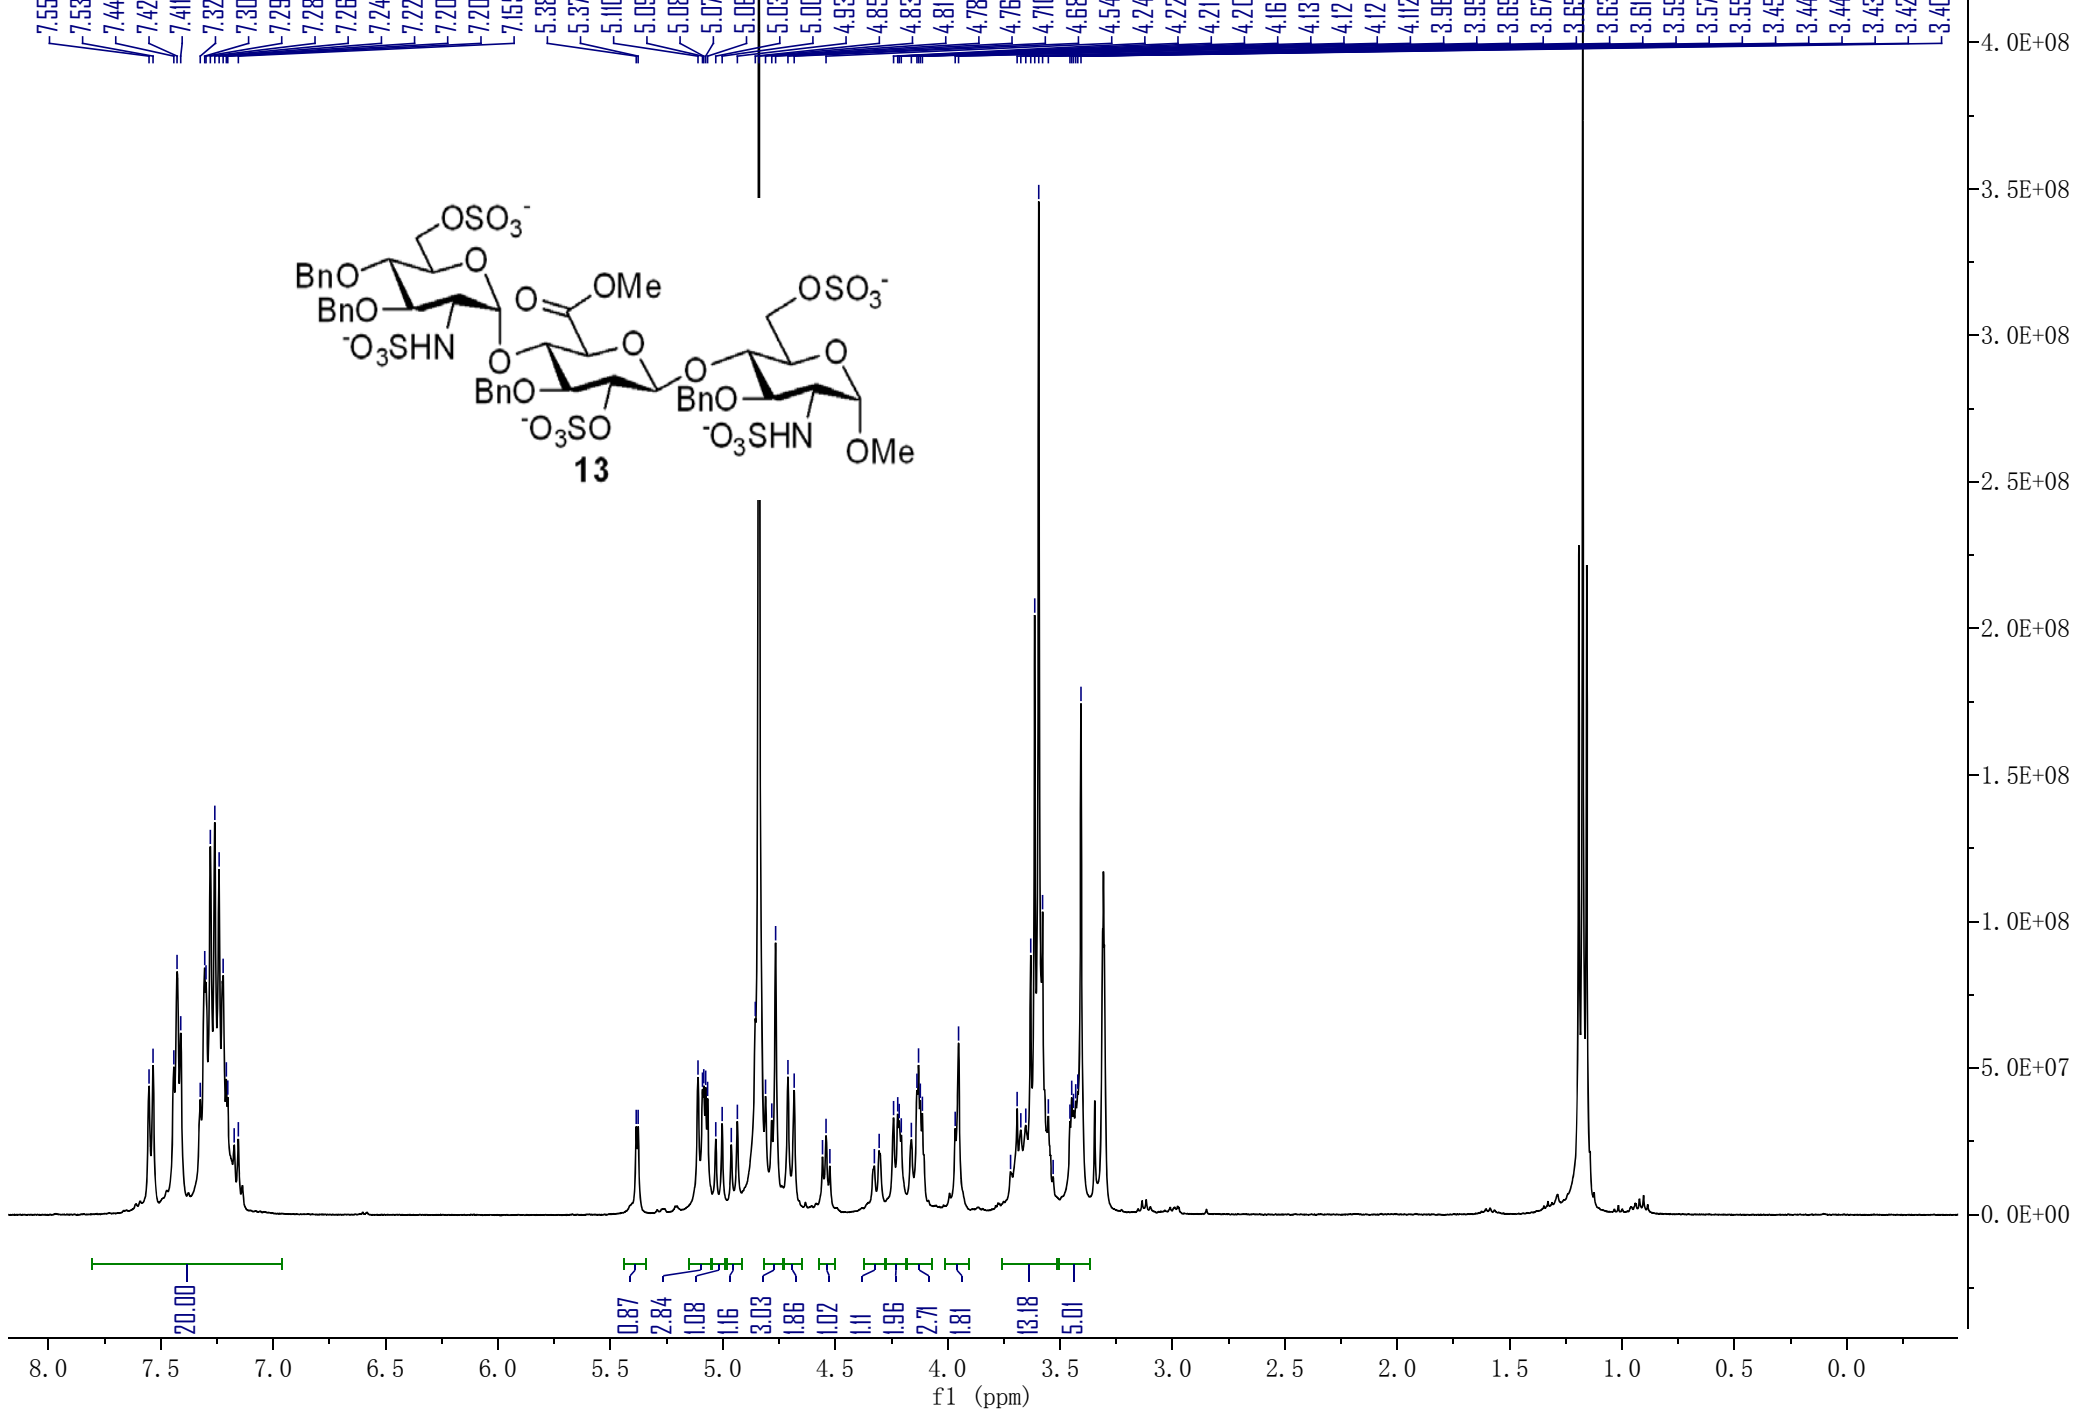

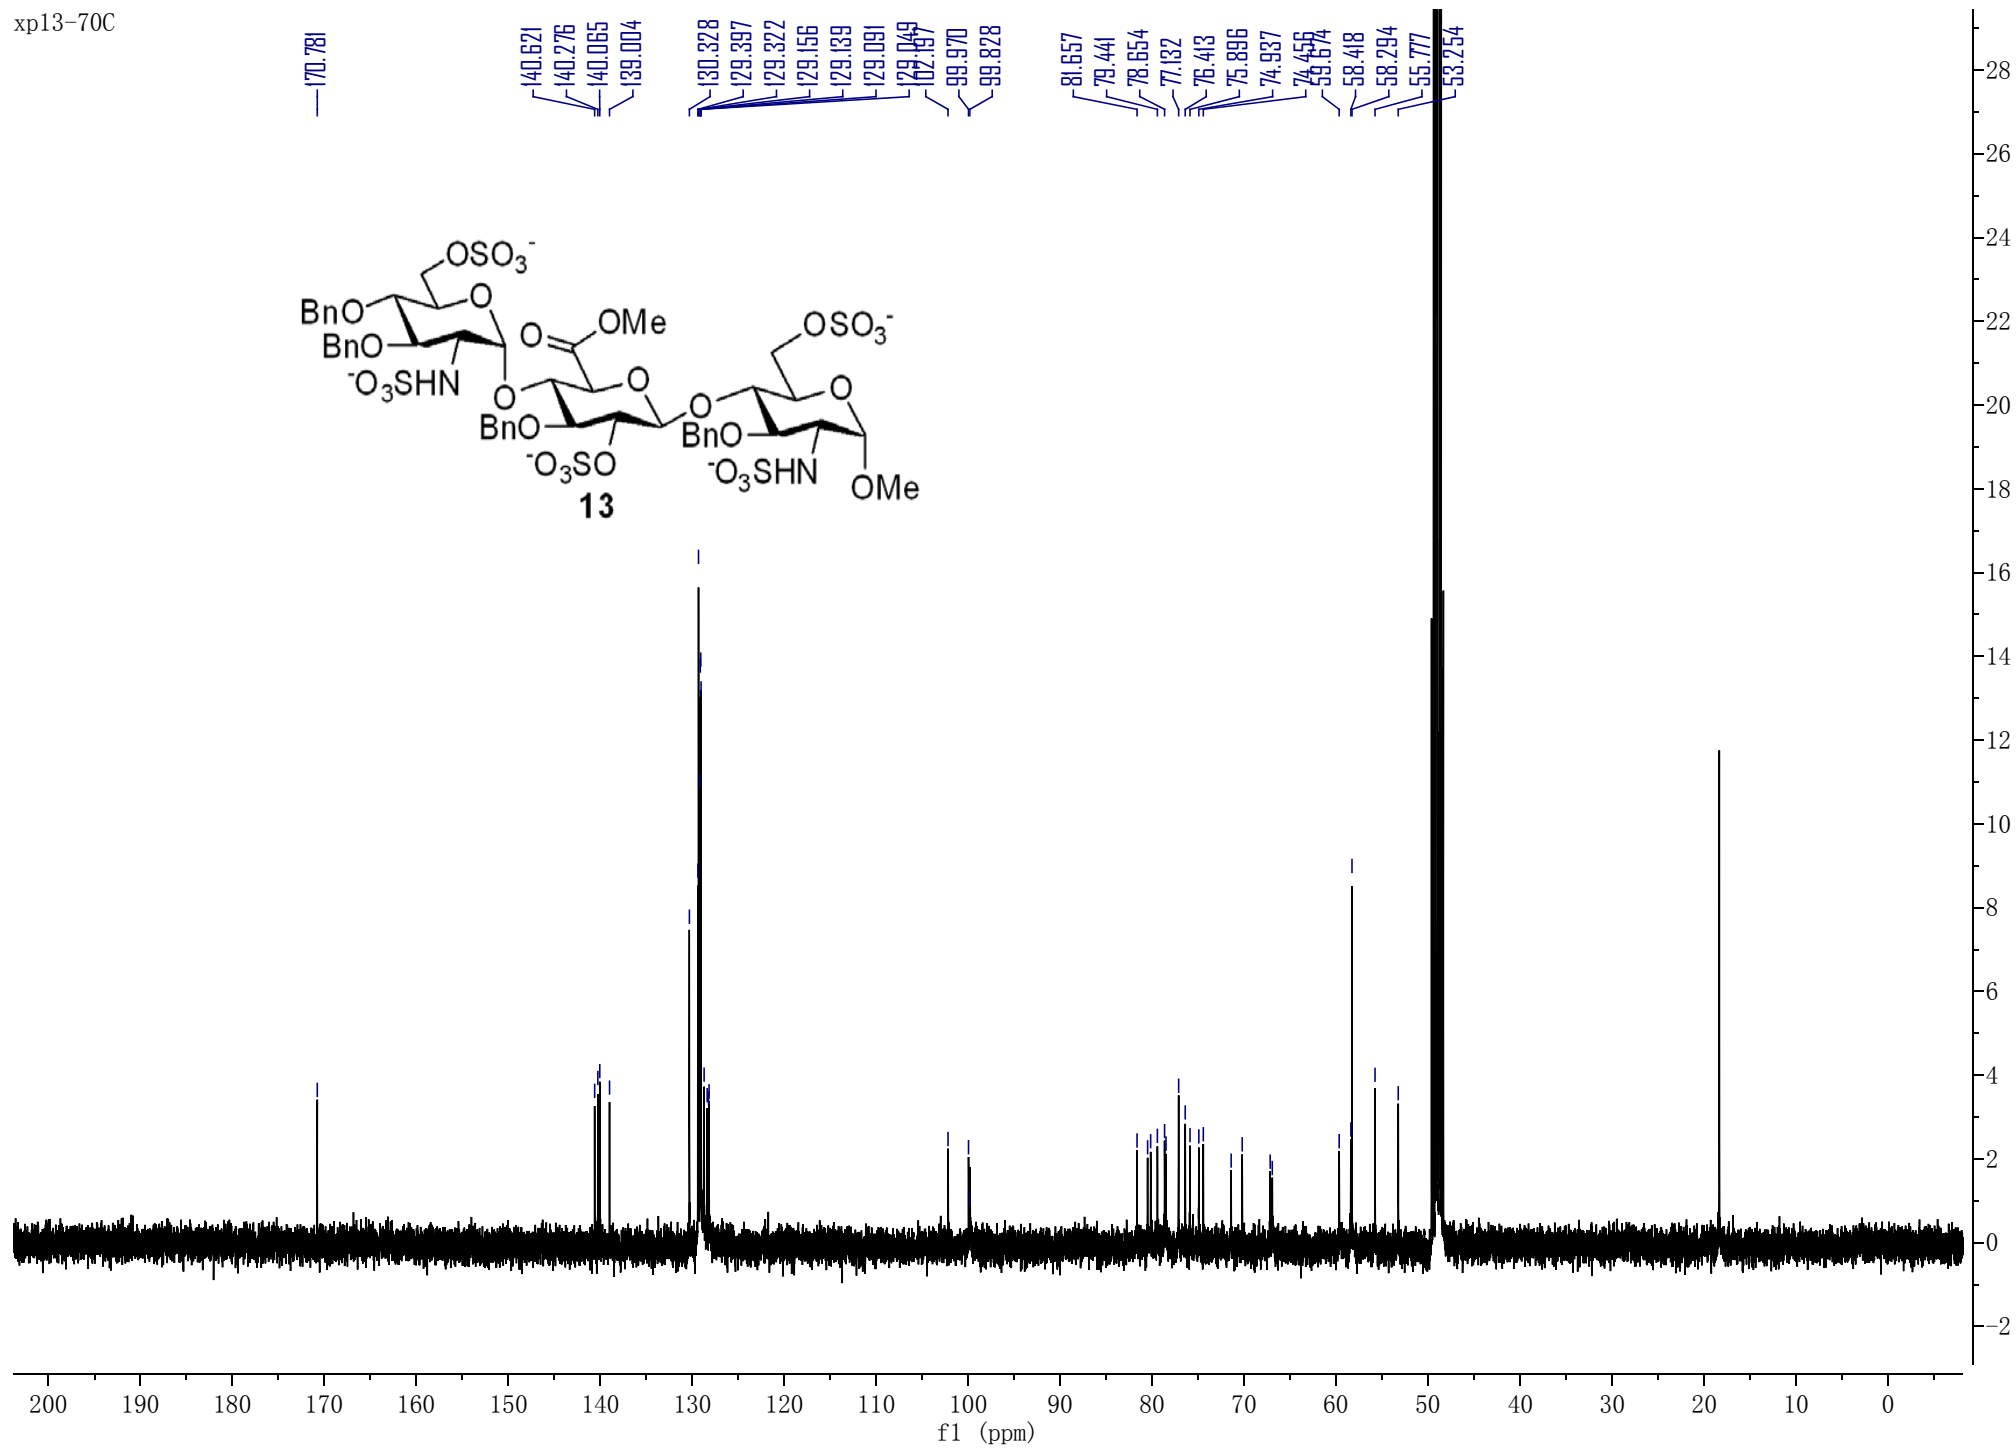



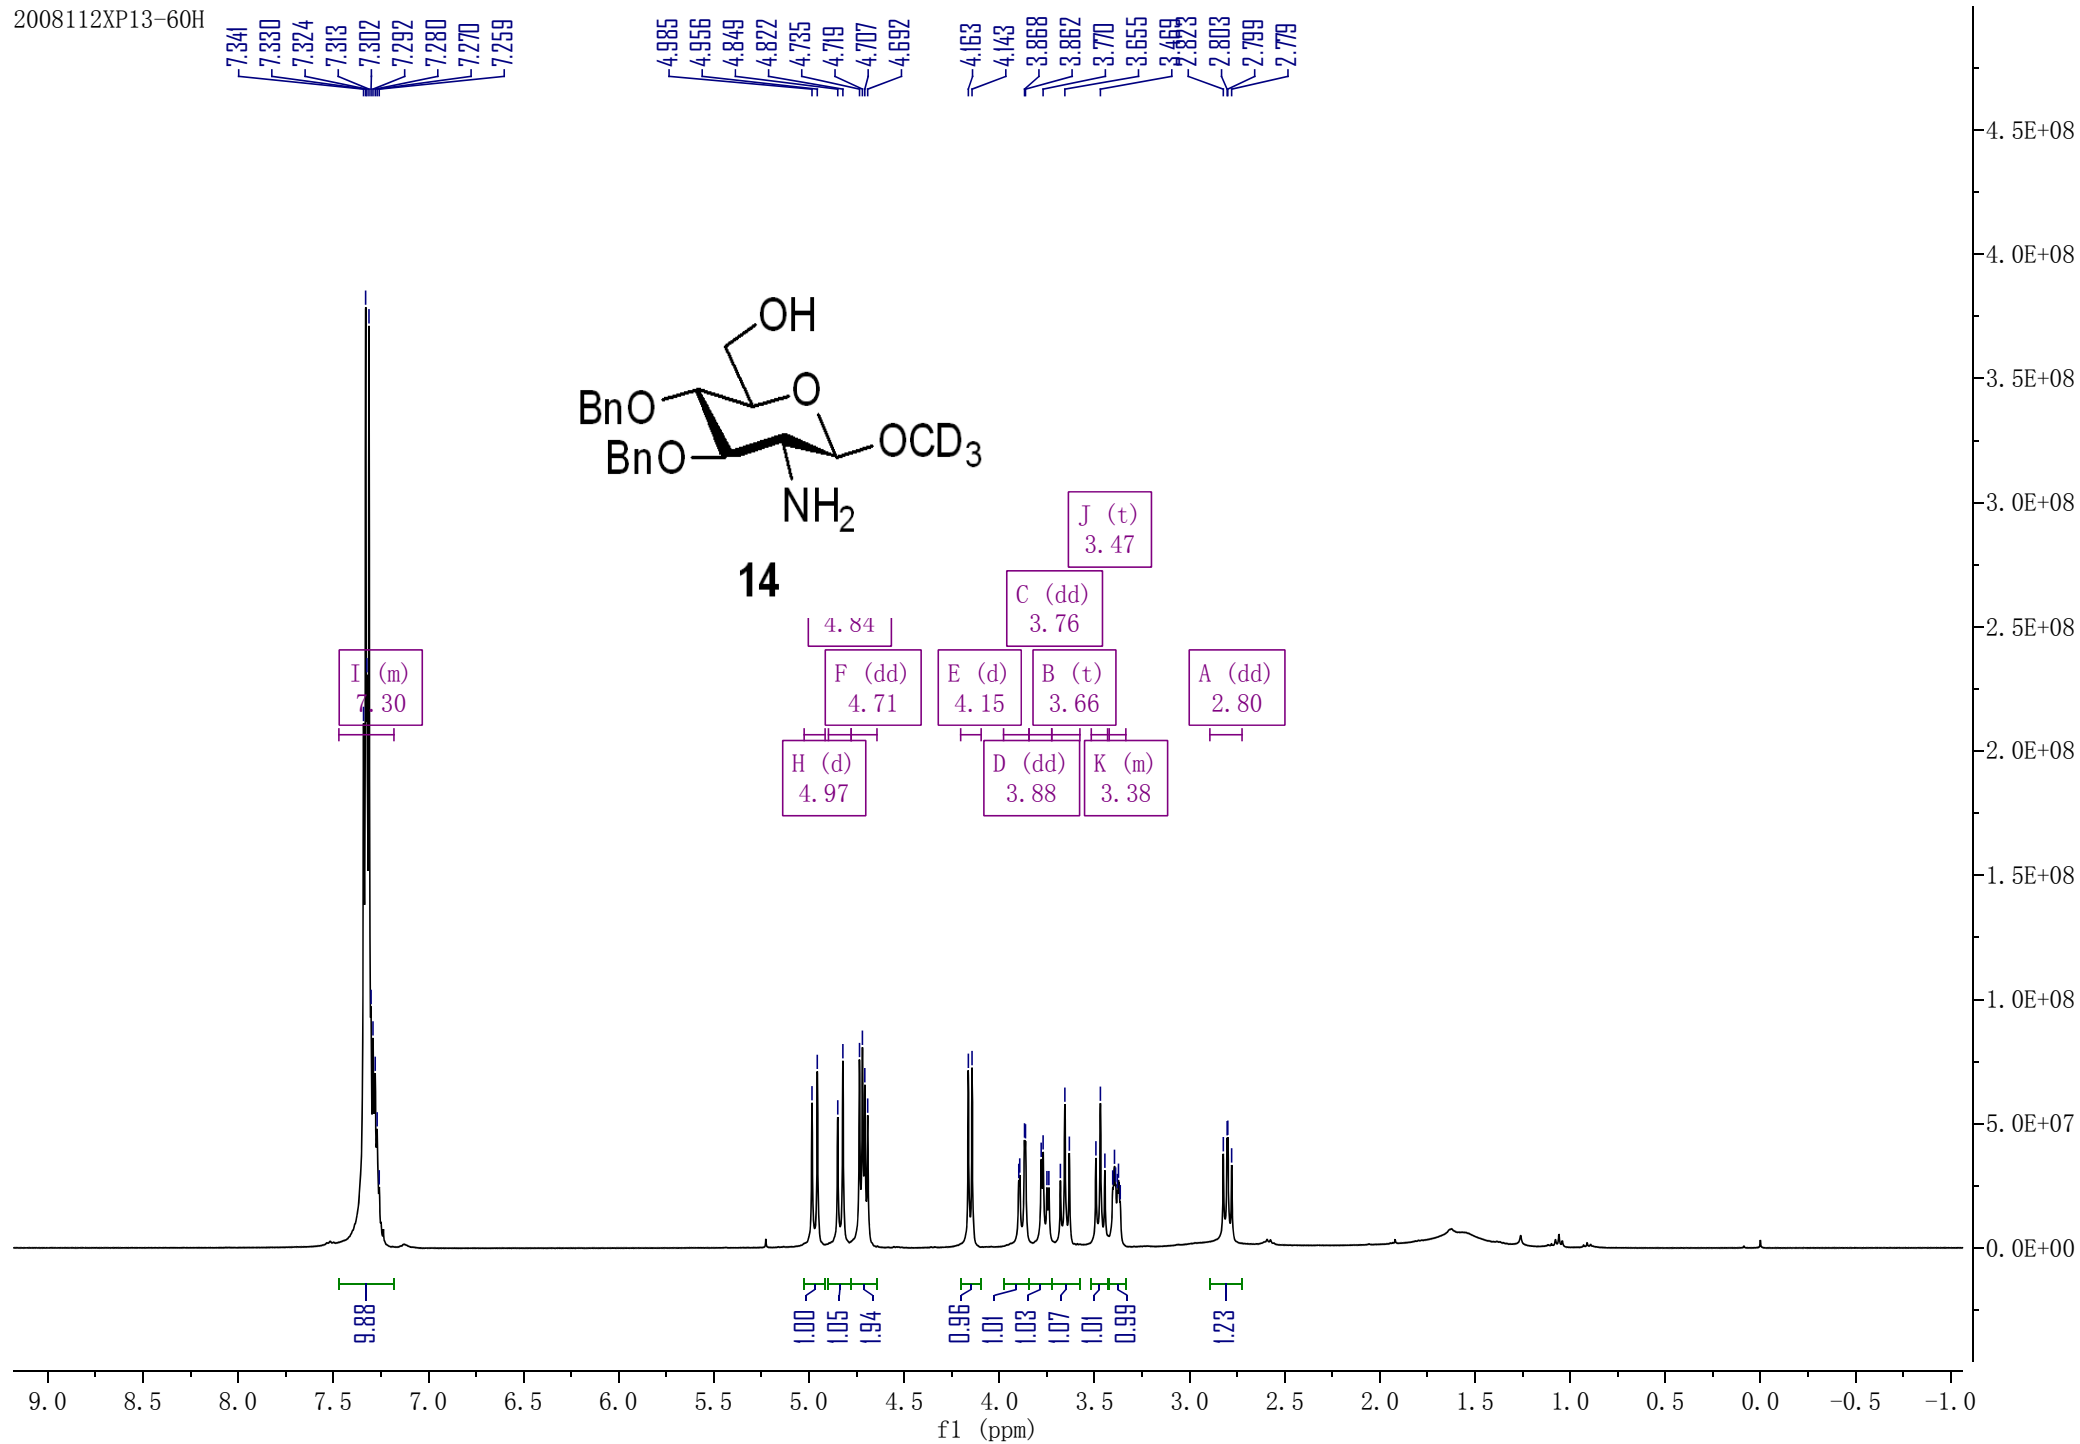

xp13-60c

138.258  
137.890  
128.535  
128.491  
127.915  
127.887  
127.857  
127.821

104.747

84.569  
78.213  
75.597  
75.302  
74.874

61.370  
56.937

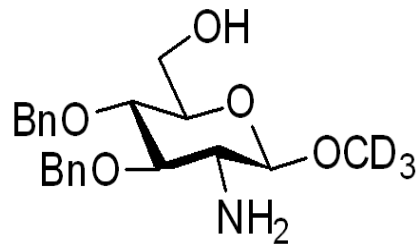

14

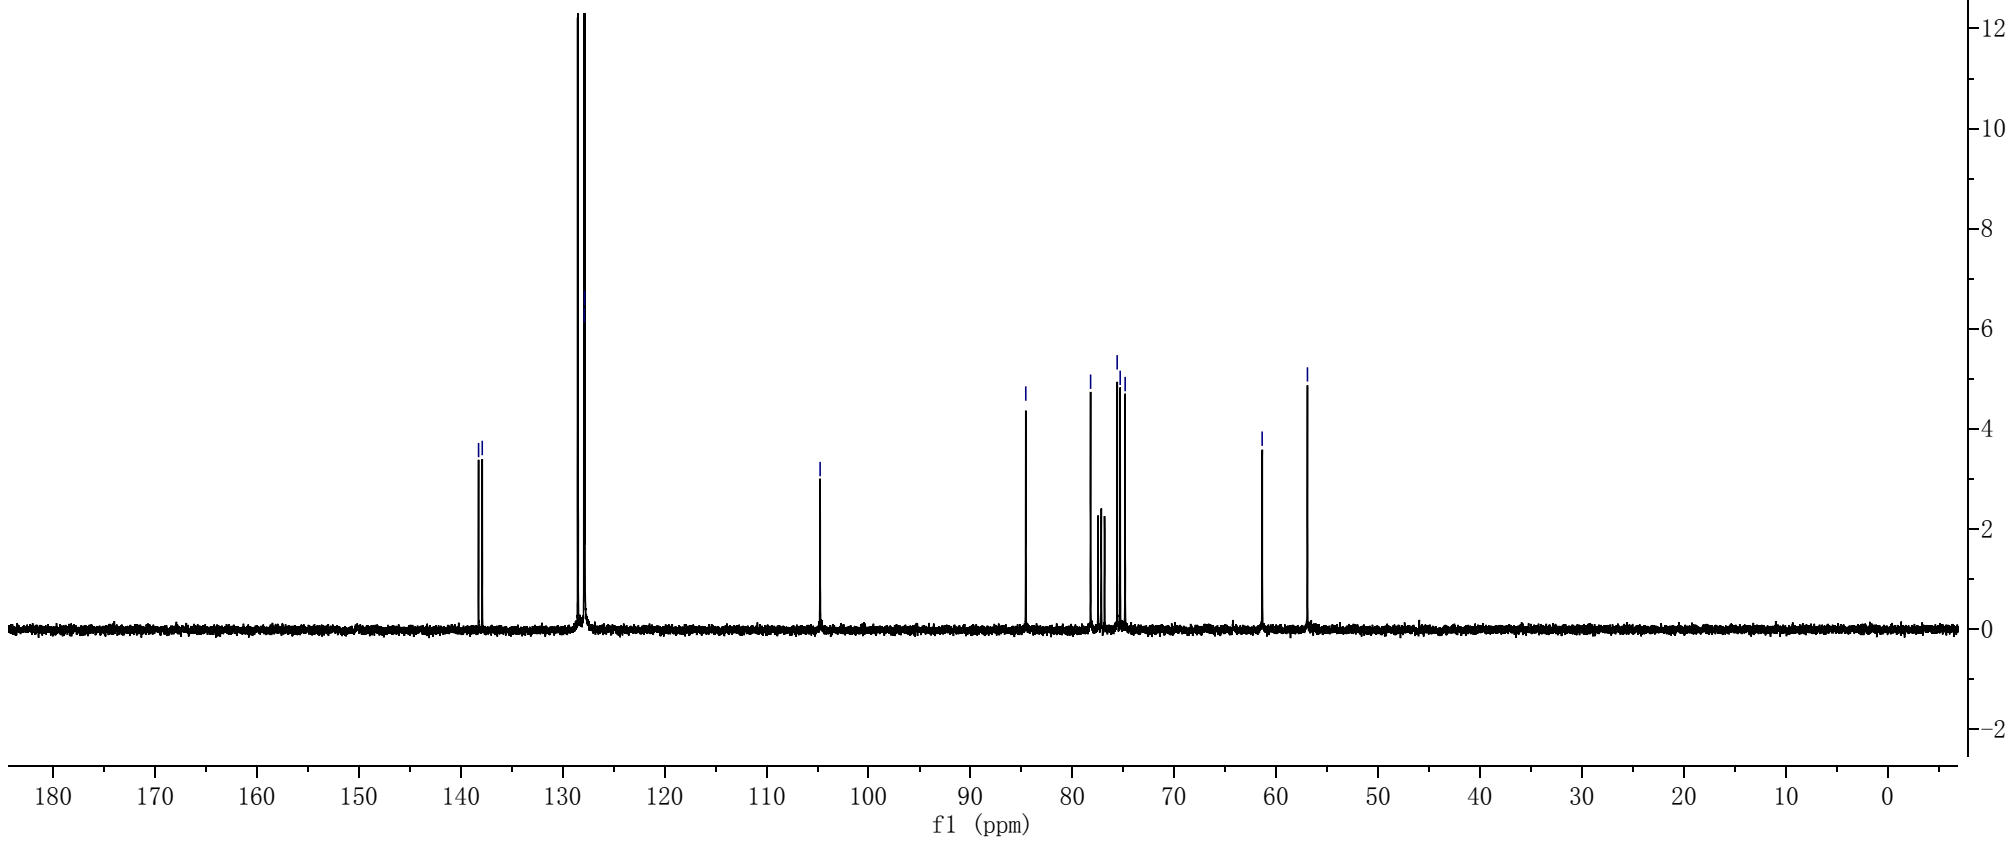

7.478  
7.376  
7.352  
7.329

5.184  
5.149  
4.964  
4.846  
4.810  
4.696  
4.675  
4.357  
-4.001  
-3.728

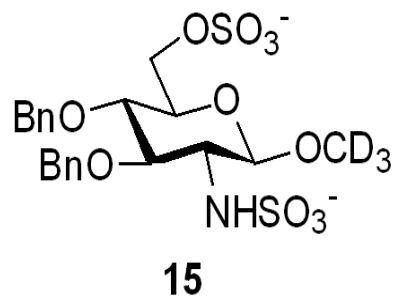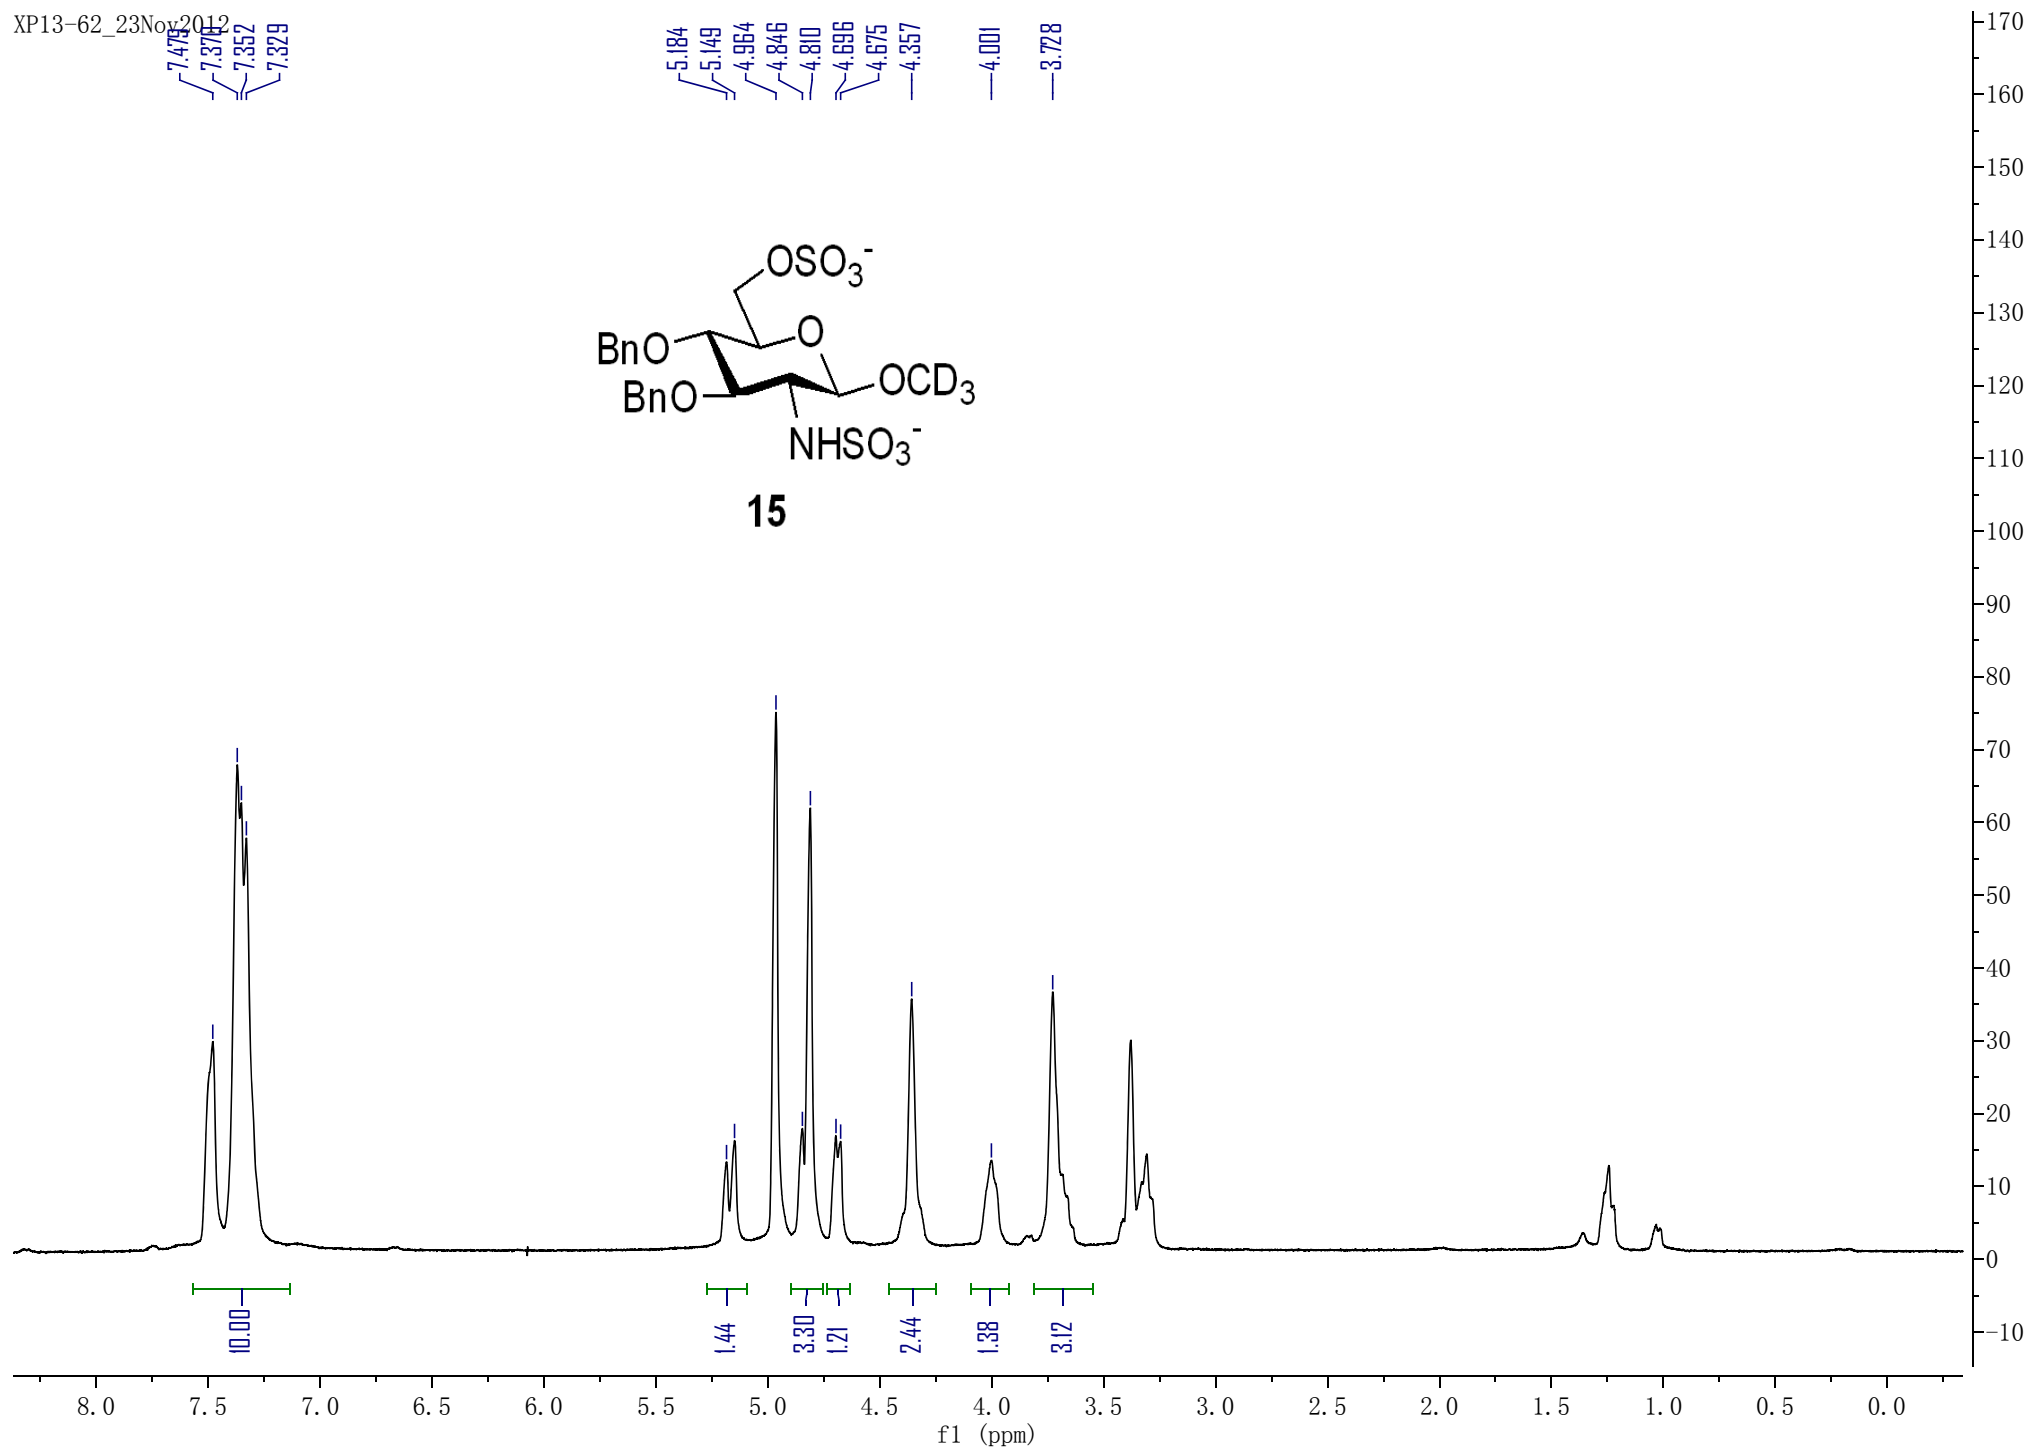

xp13-62c  
200812813-15-3

104.189

82.819

78.678

75.313

75.247

74.637

67.859

60.556

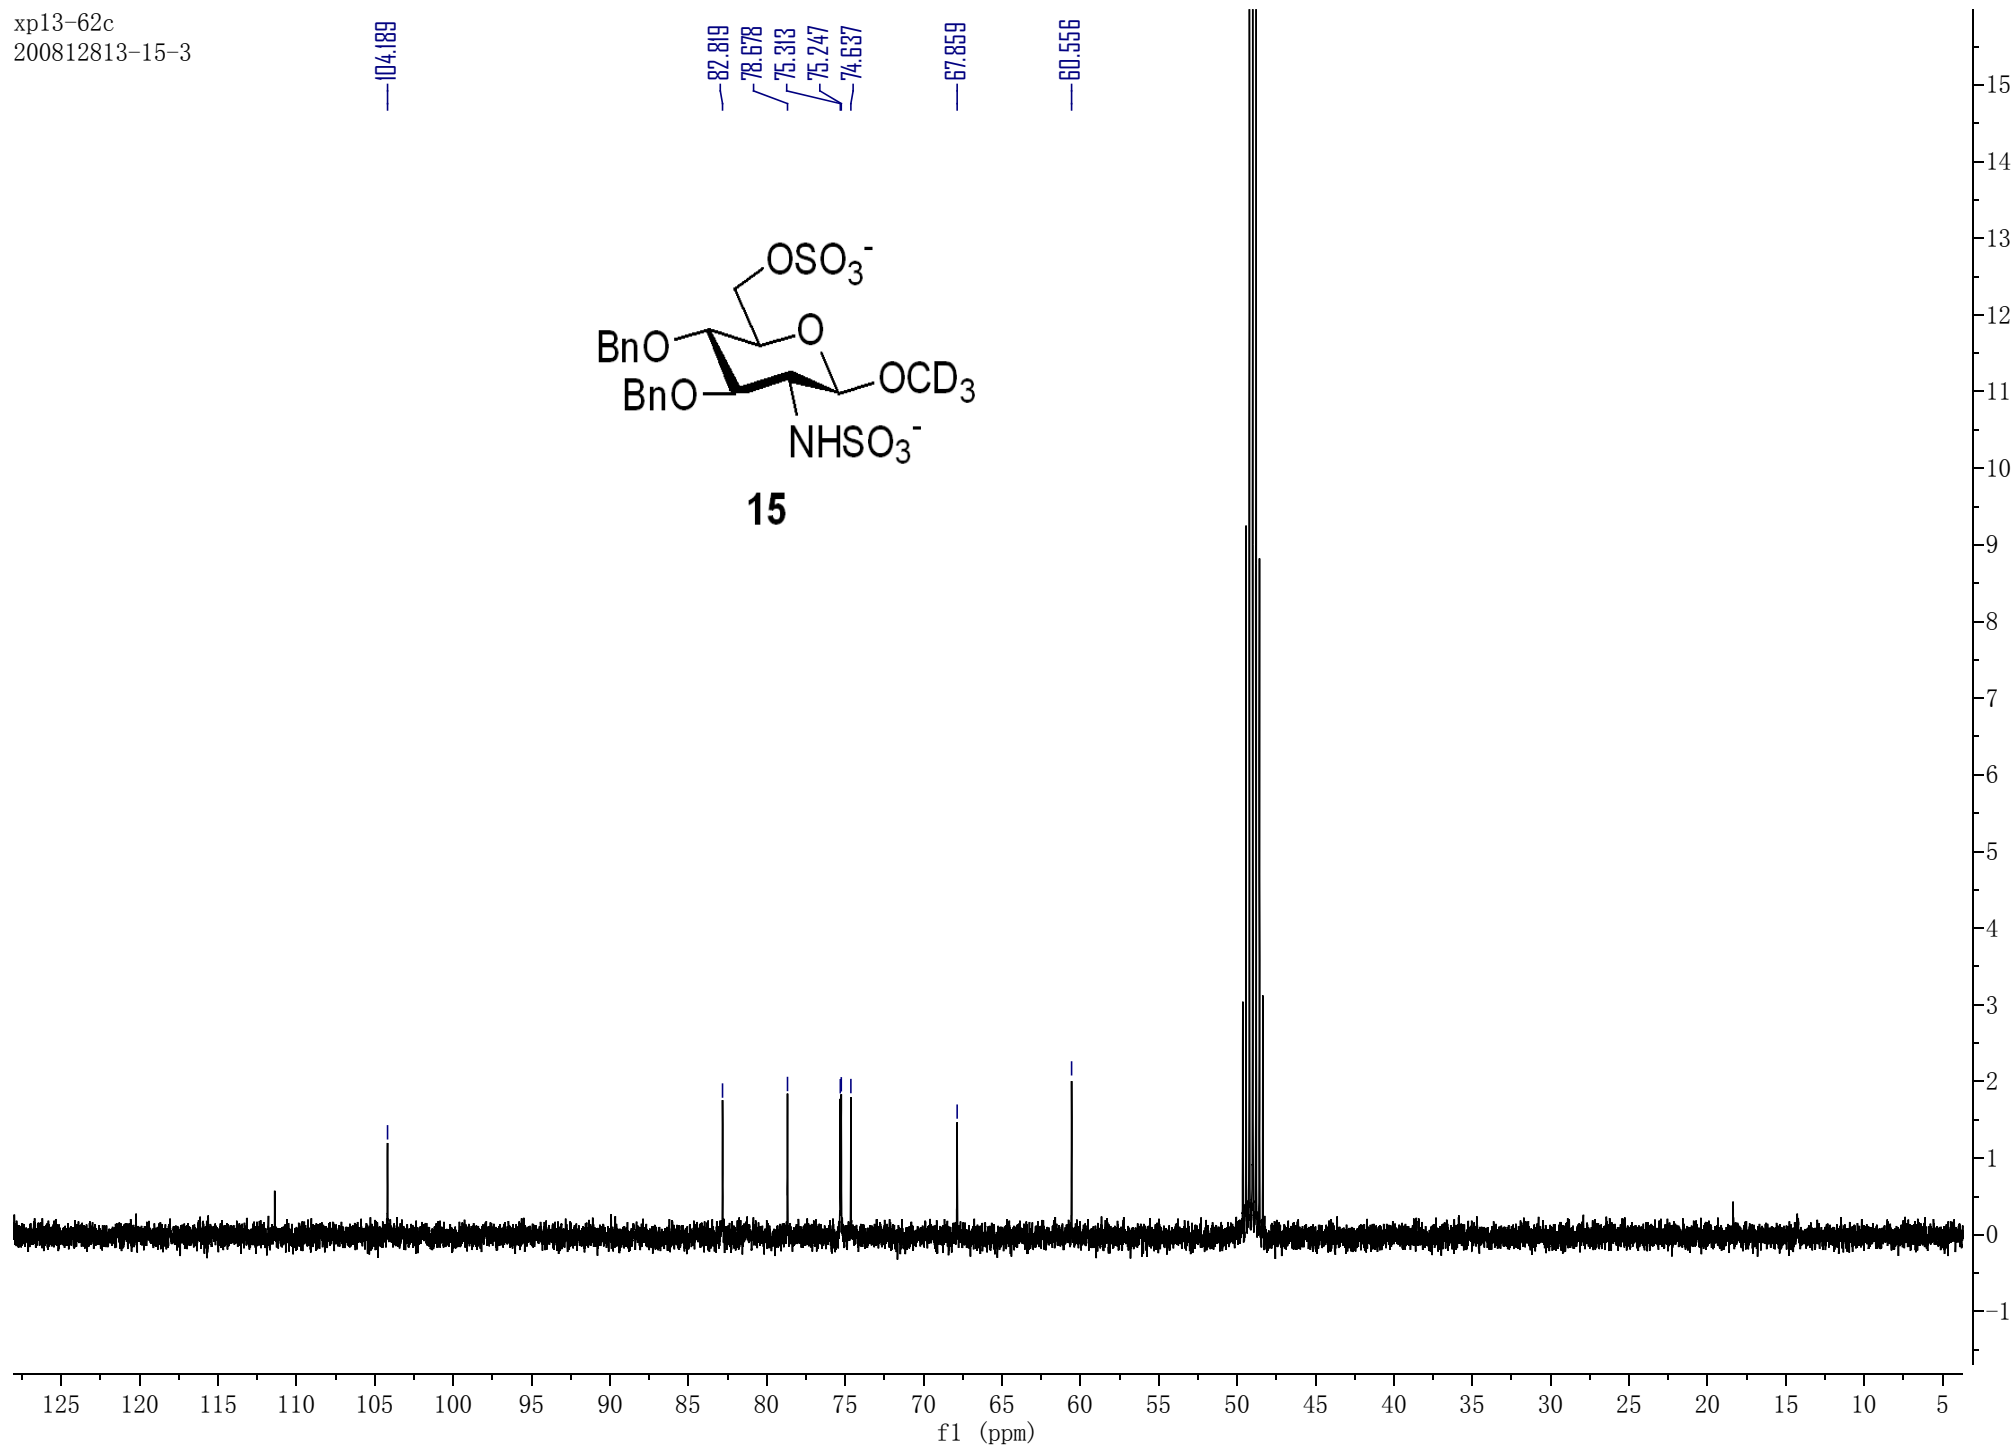

xp13-66H

7.340  
7.328  
7.314  
7.292  
7.257

4.984  
4.956  
4.868  
4.840  
4.780  
4.717  
4.703  
4.675

3.798  
3.765  
3.756  
3.663  
3.591  
3.567  
3.542  
2.782  
2.774  
2.759  
2.751

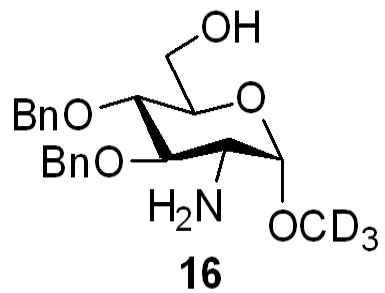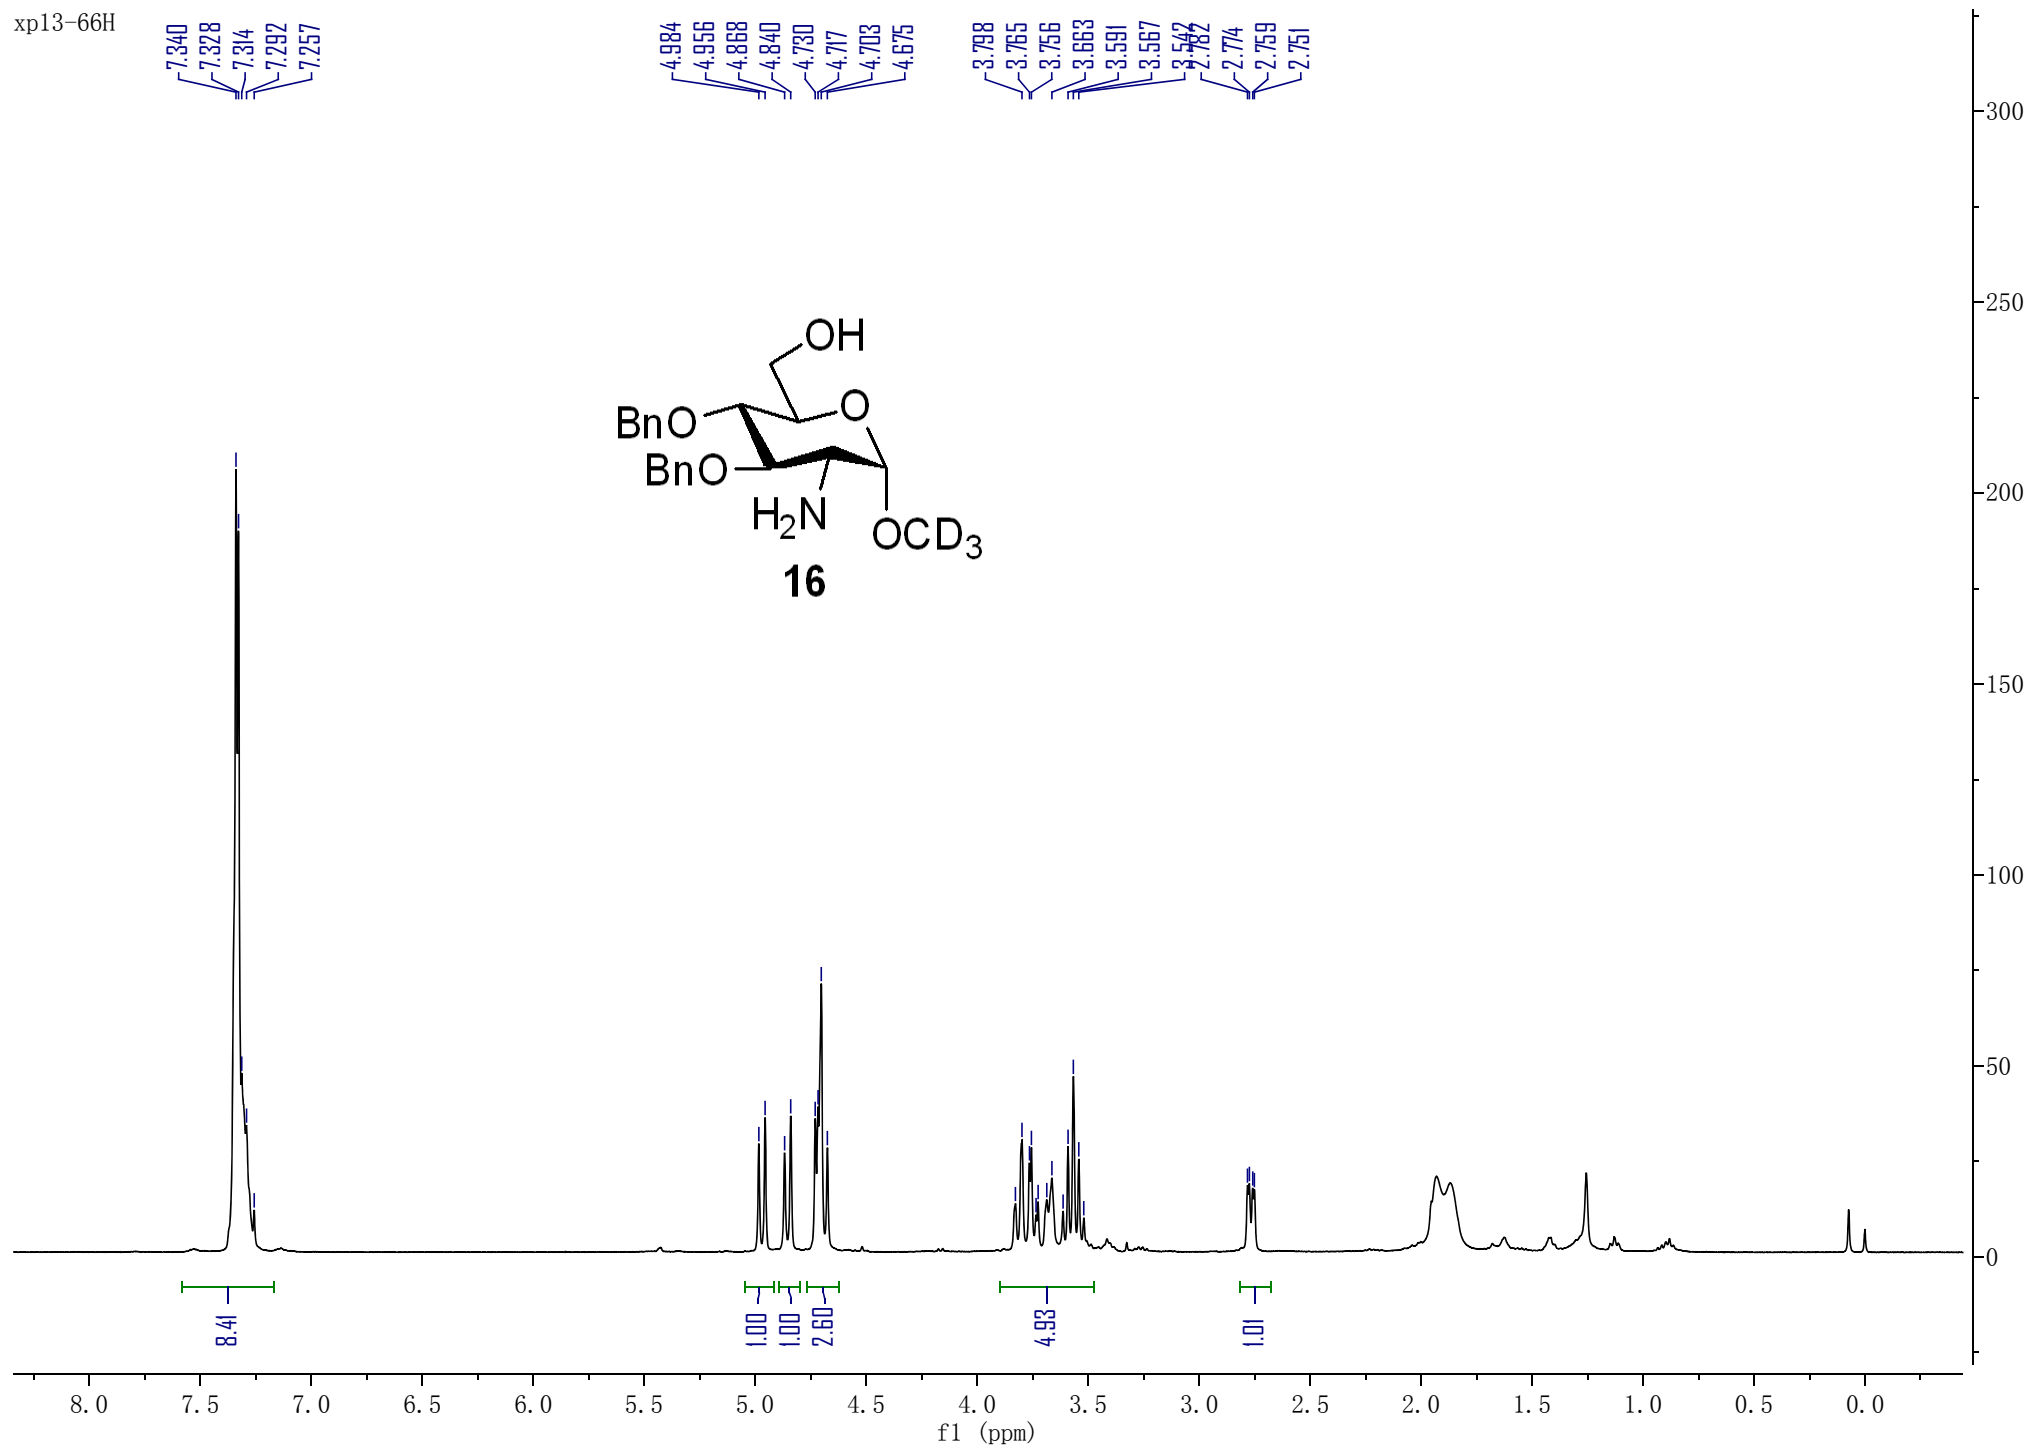

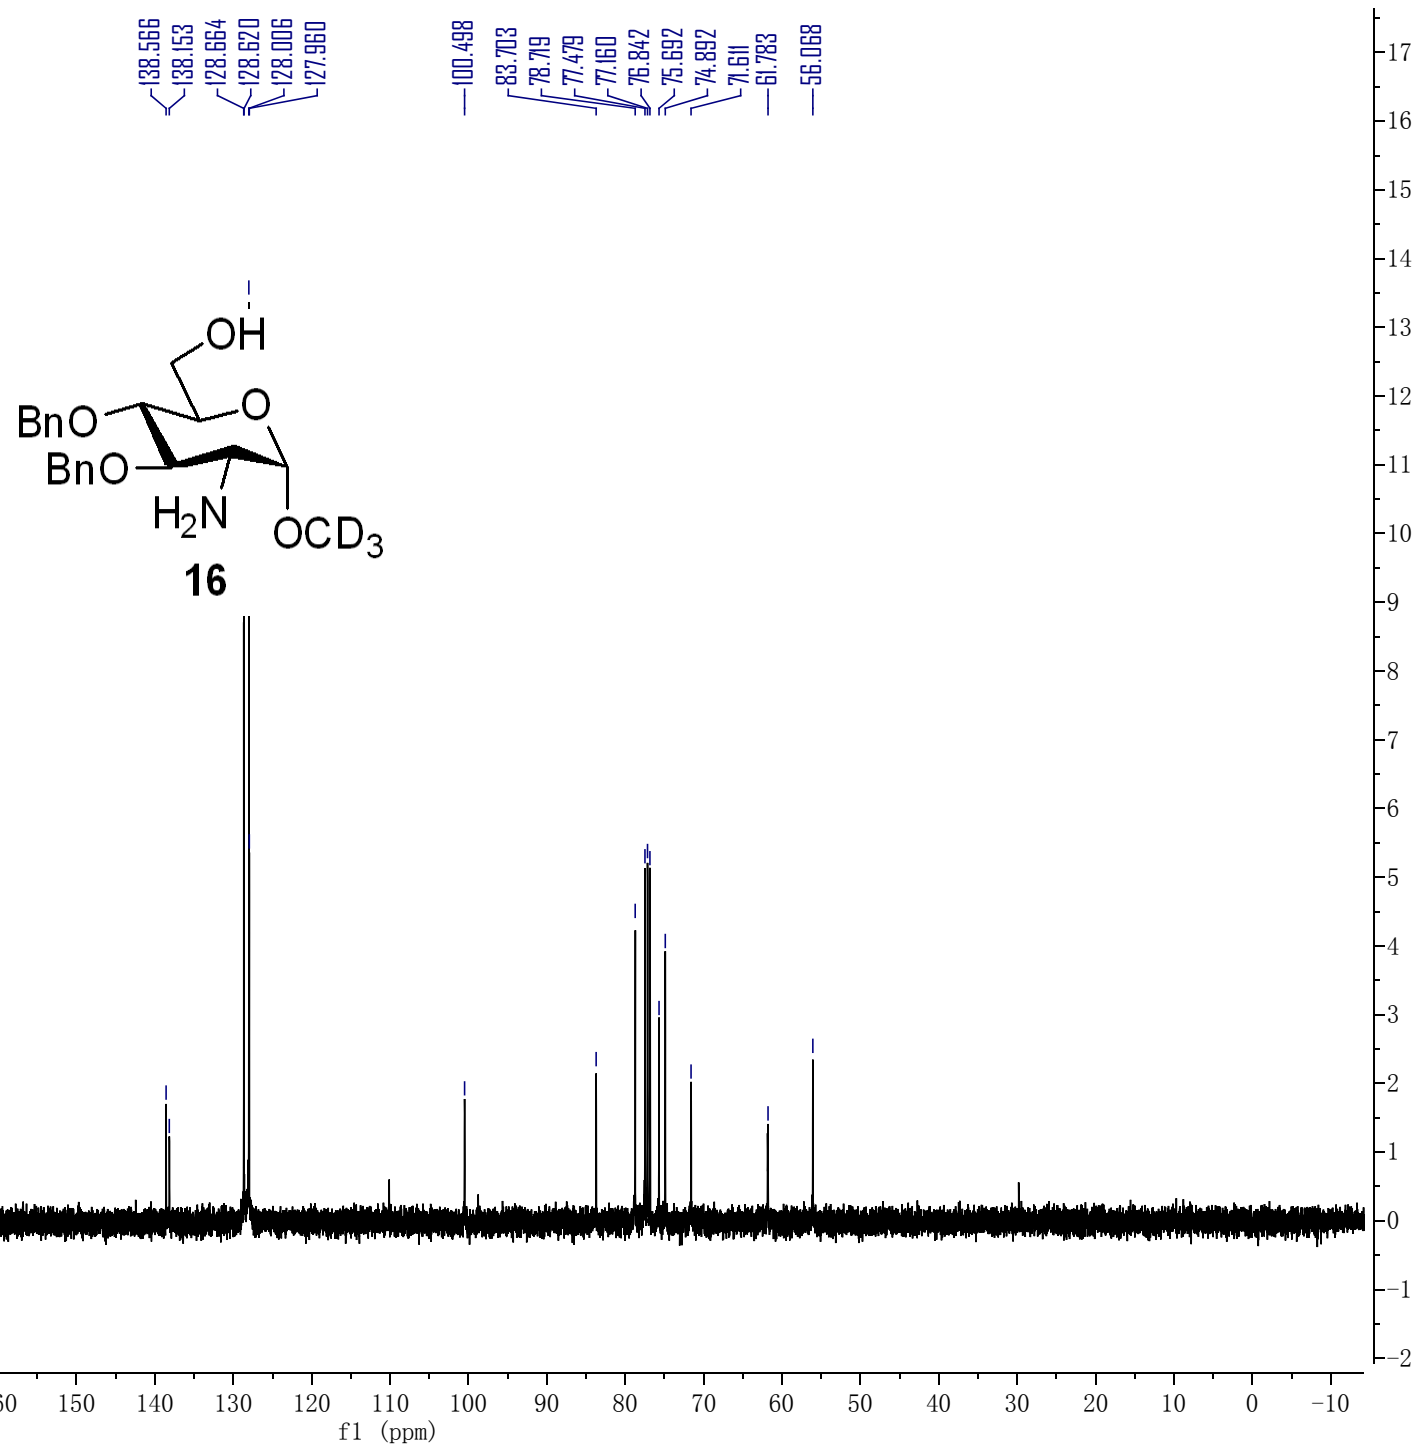

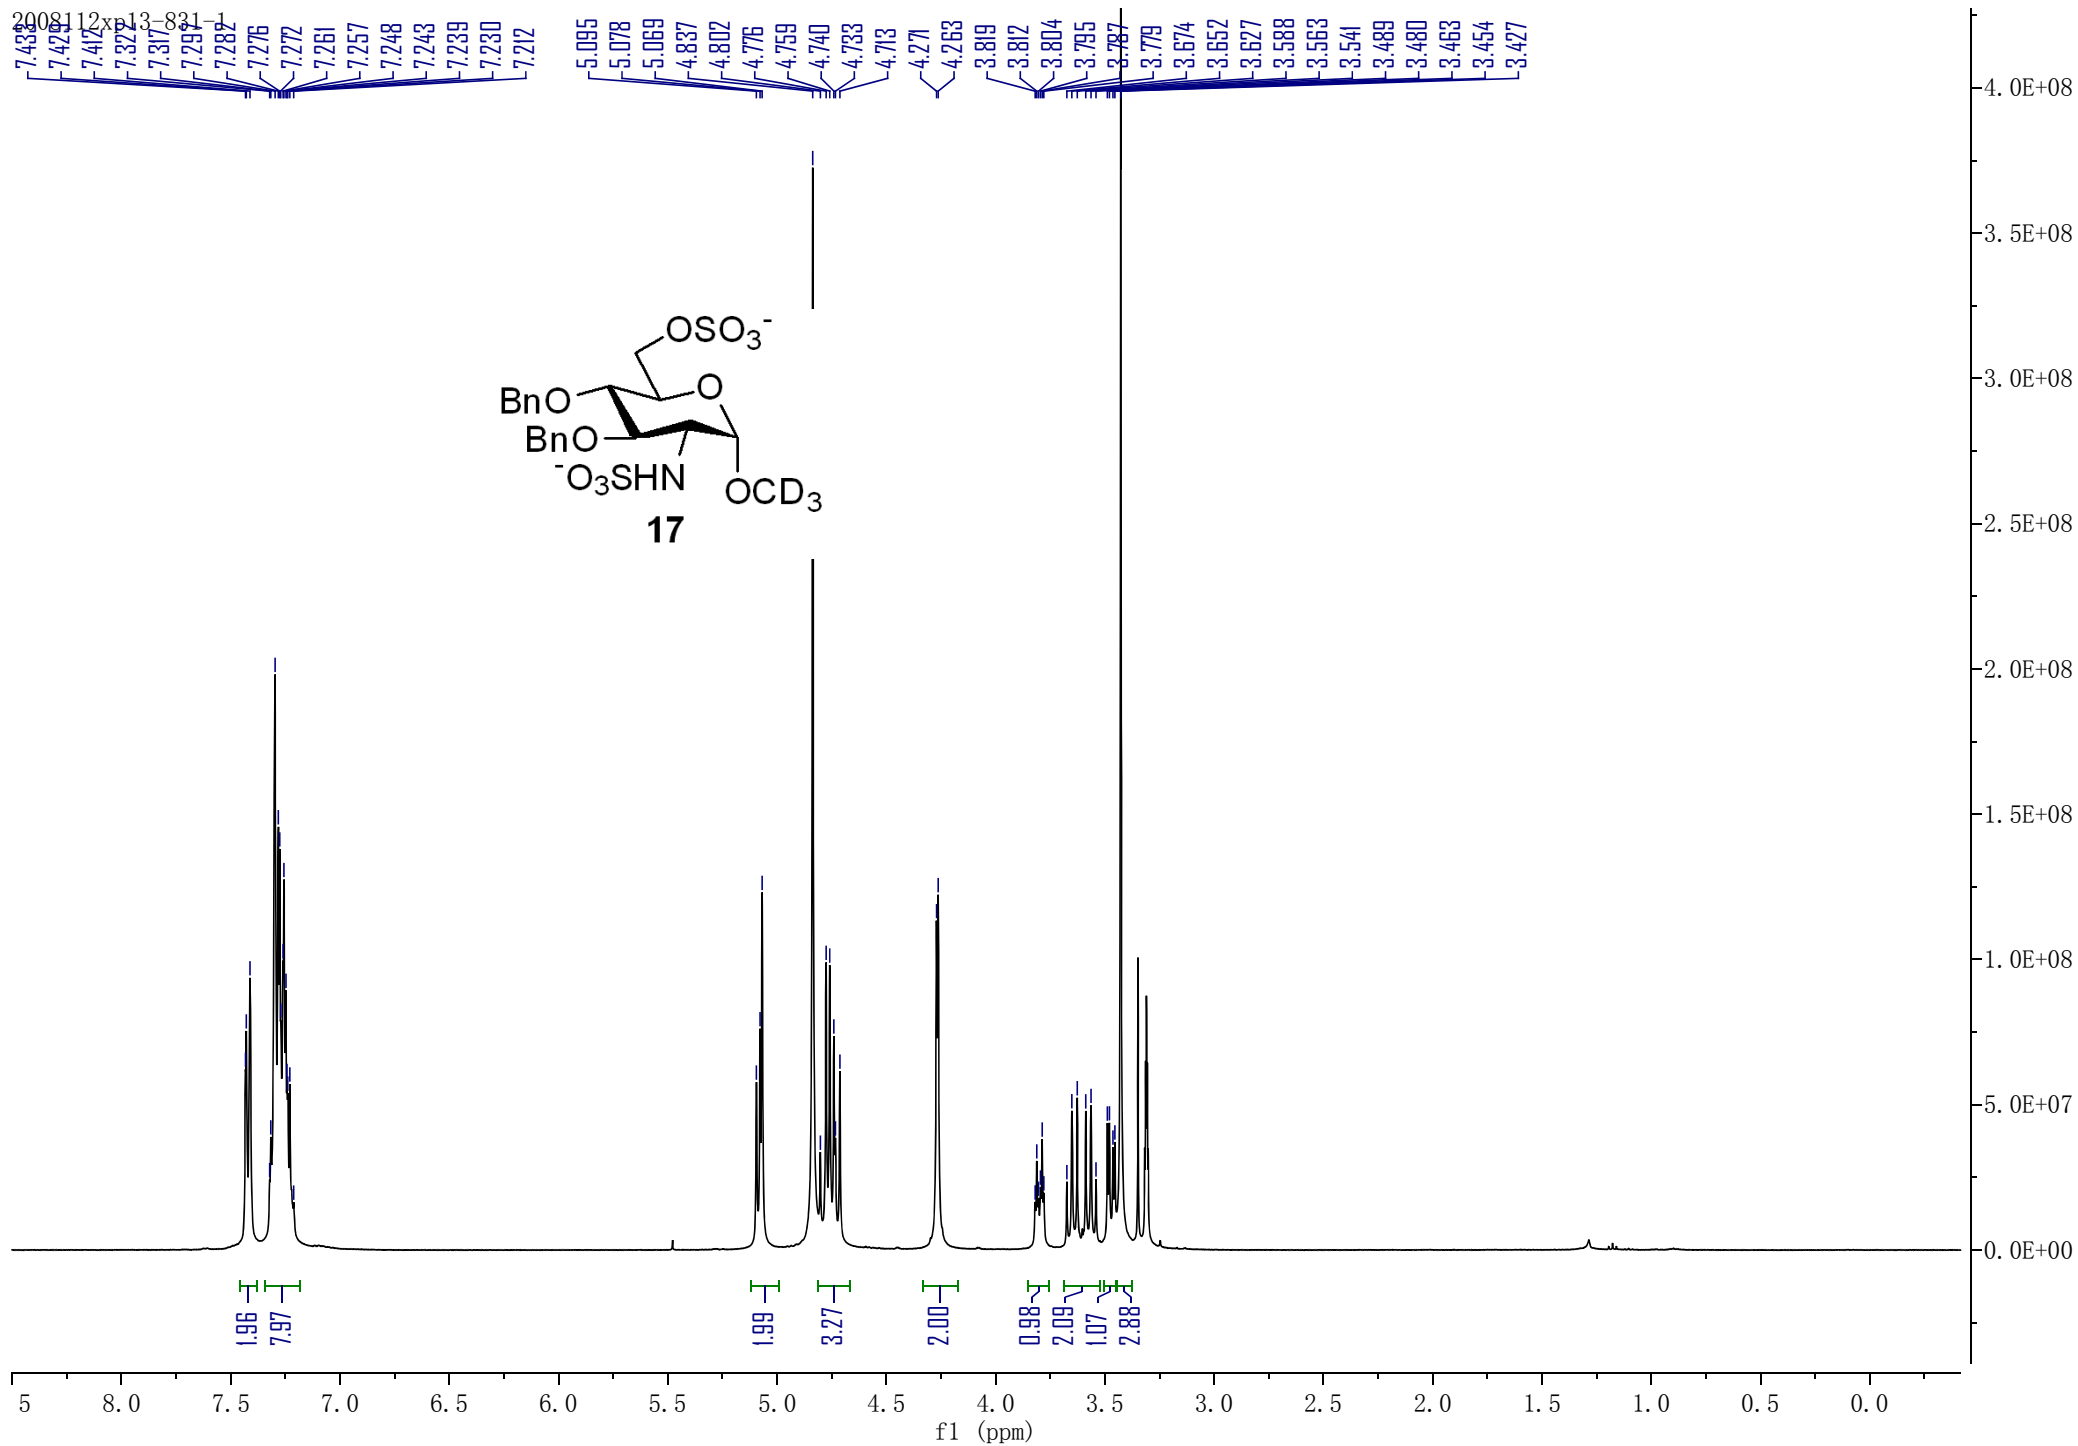

xp13-69C

140.201  
139.697  
129.360  
129.212  
129.178  
129.187  
128.559  
128.420

100.140

81.932  
78.991  
76.201  
75.989  
70.550  
67.659  
59.496

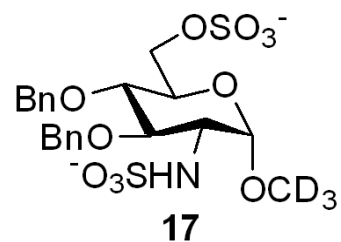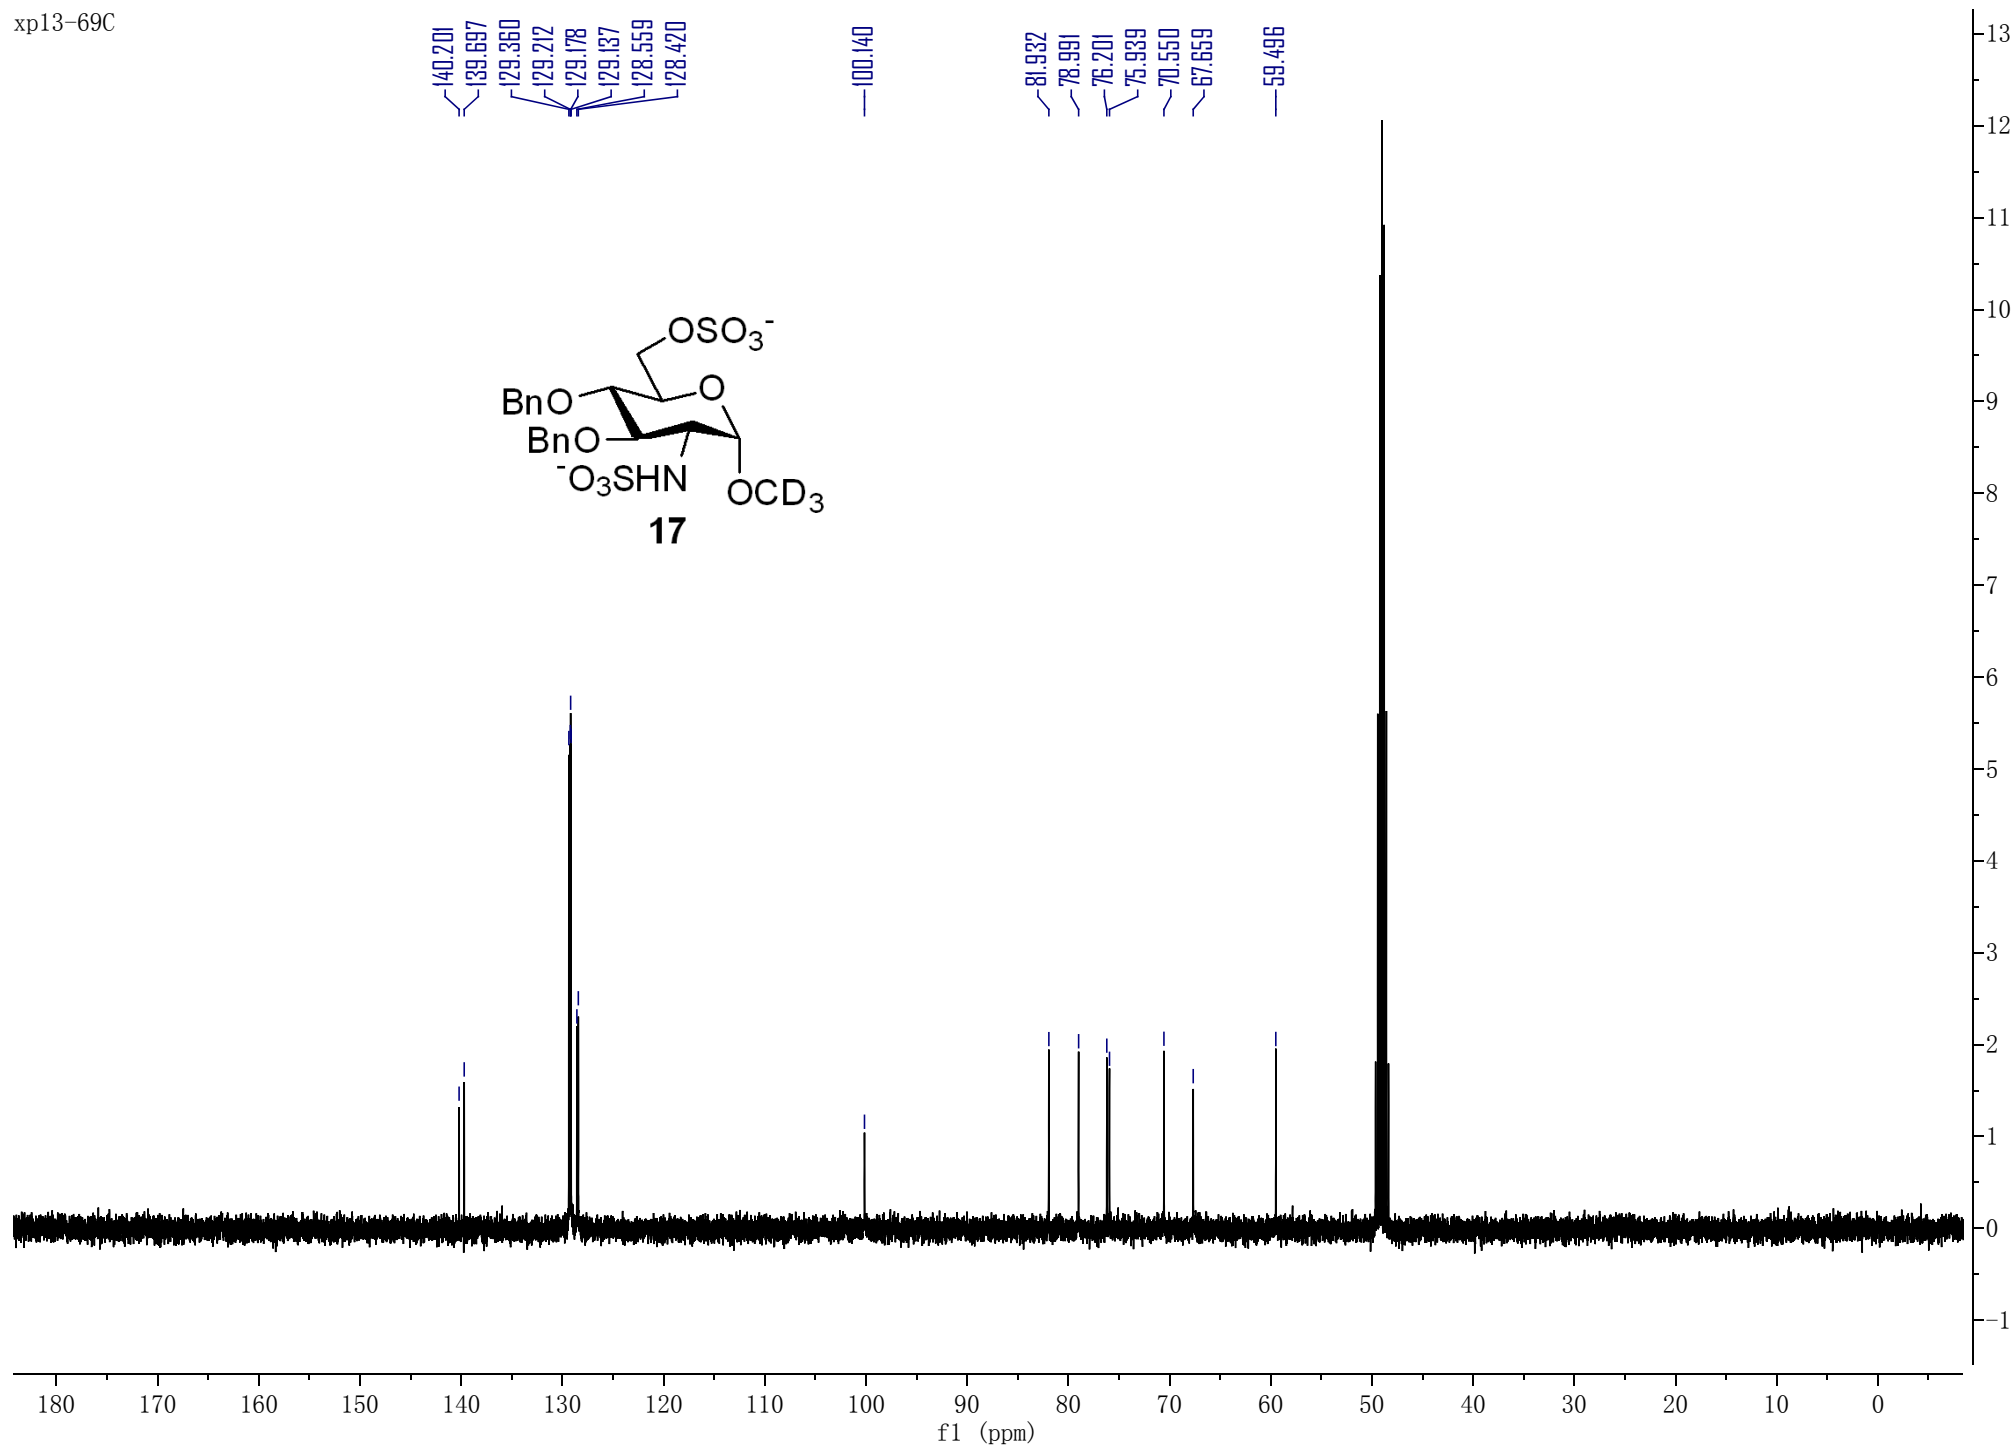



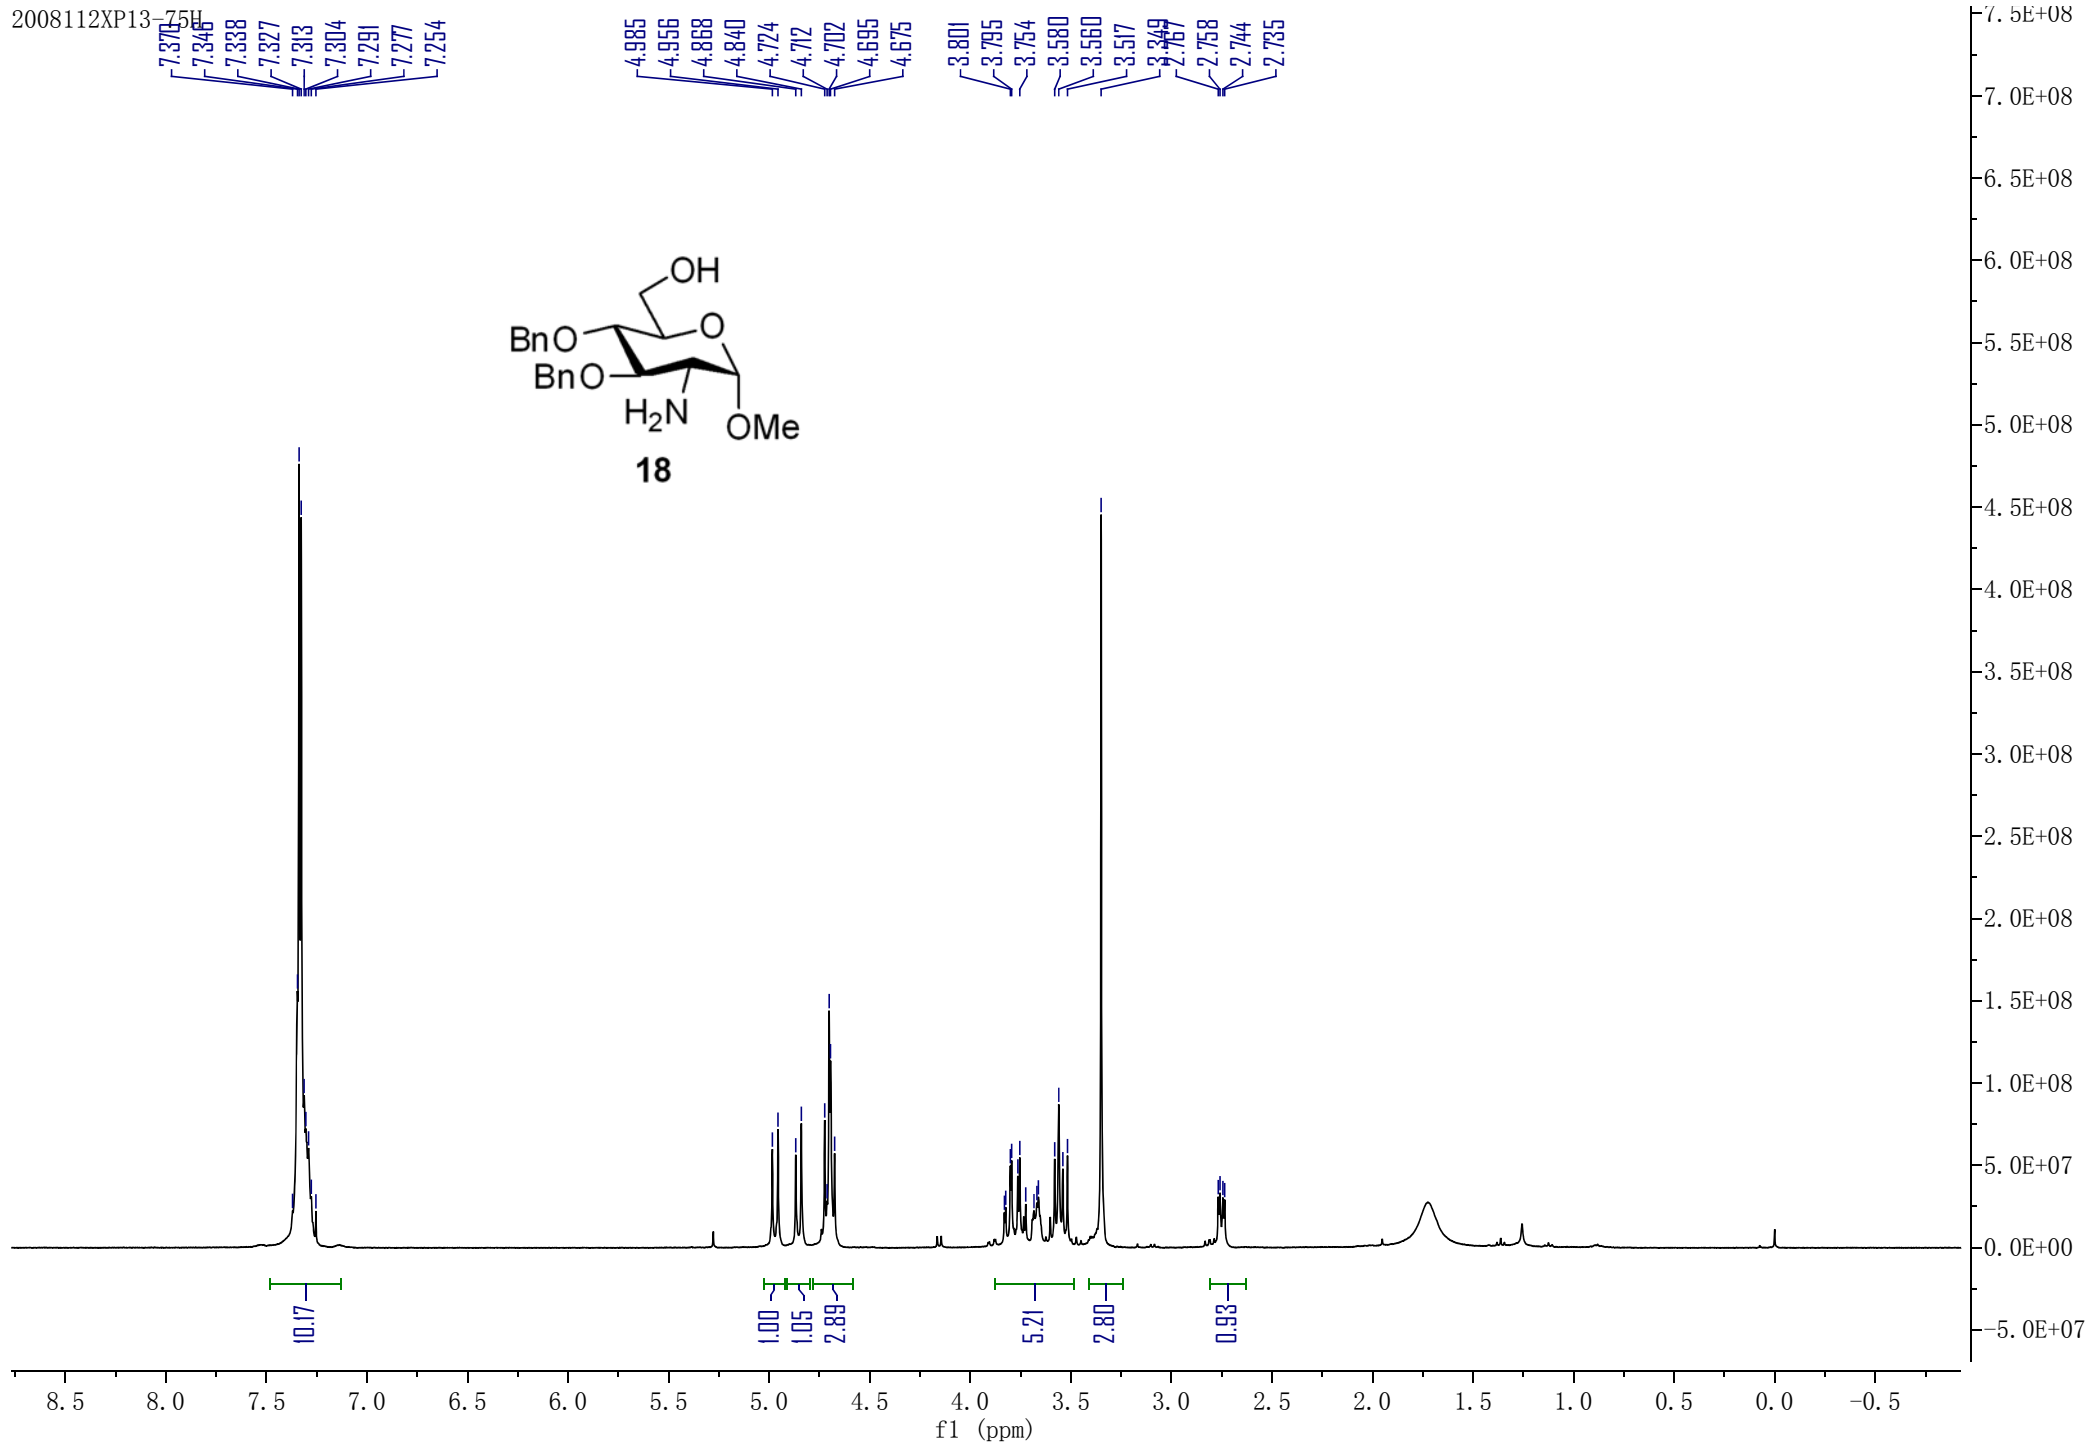

138.595  
138.174  
128.659  
127.999  
100.675  
83.890  
78.726  
77.478  
77.160  
76.843  
75.706  
74.883  
71.626  
61.784  
56.135  
55.217

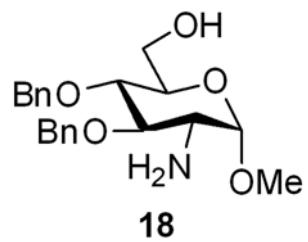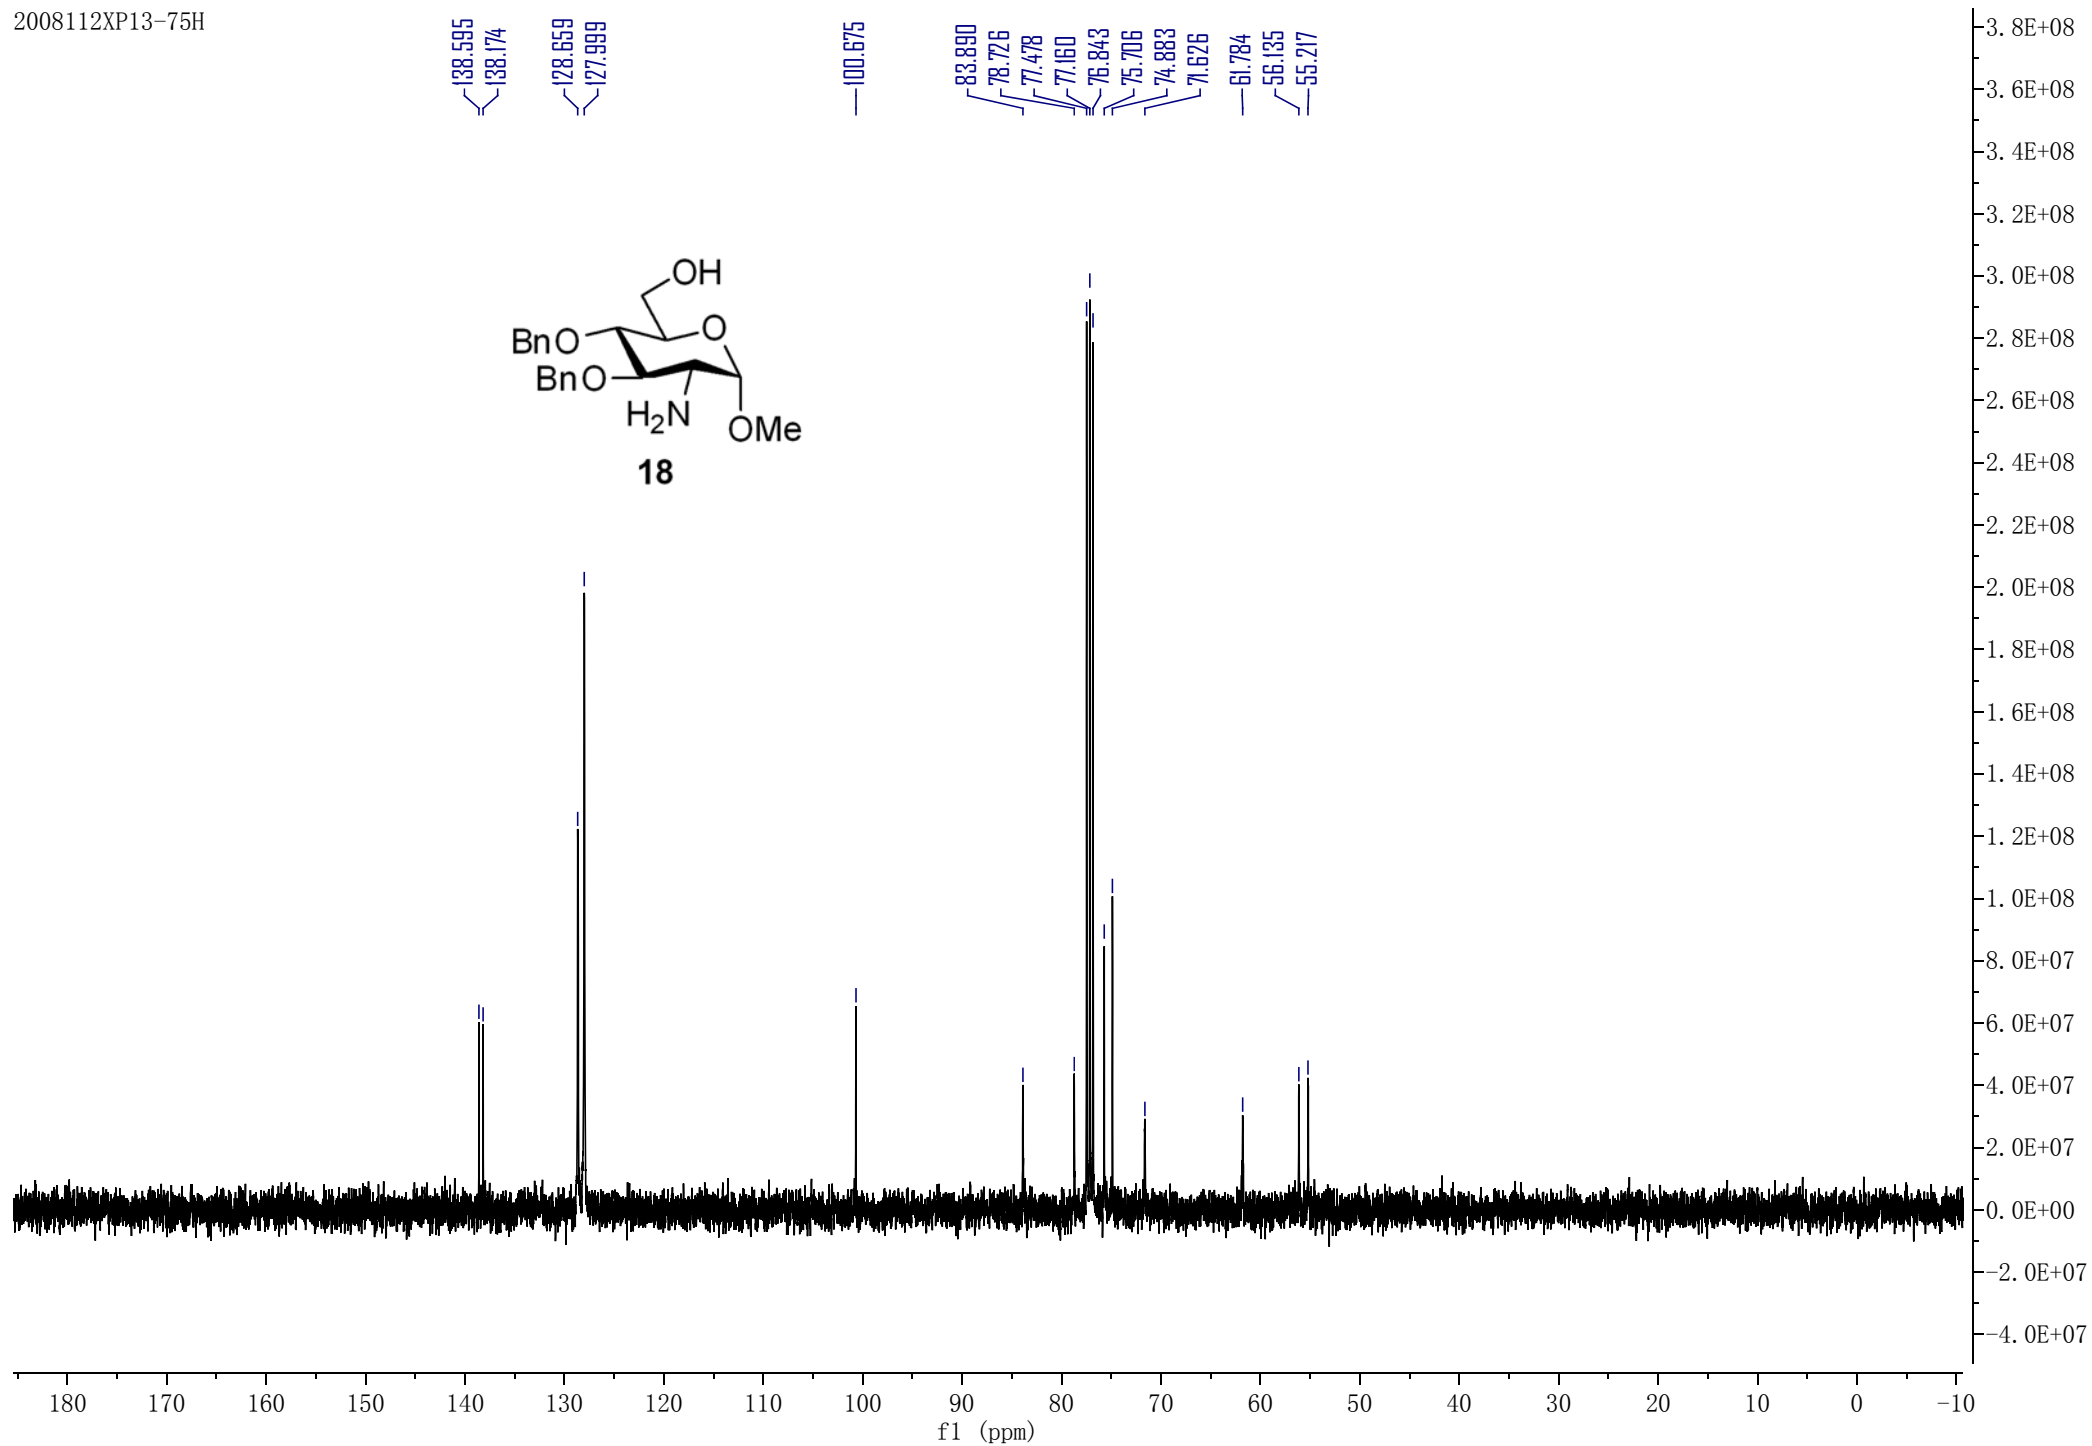

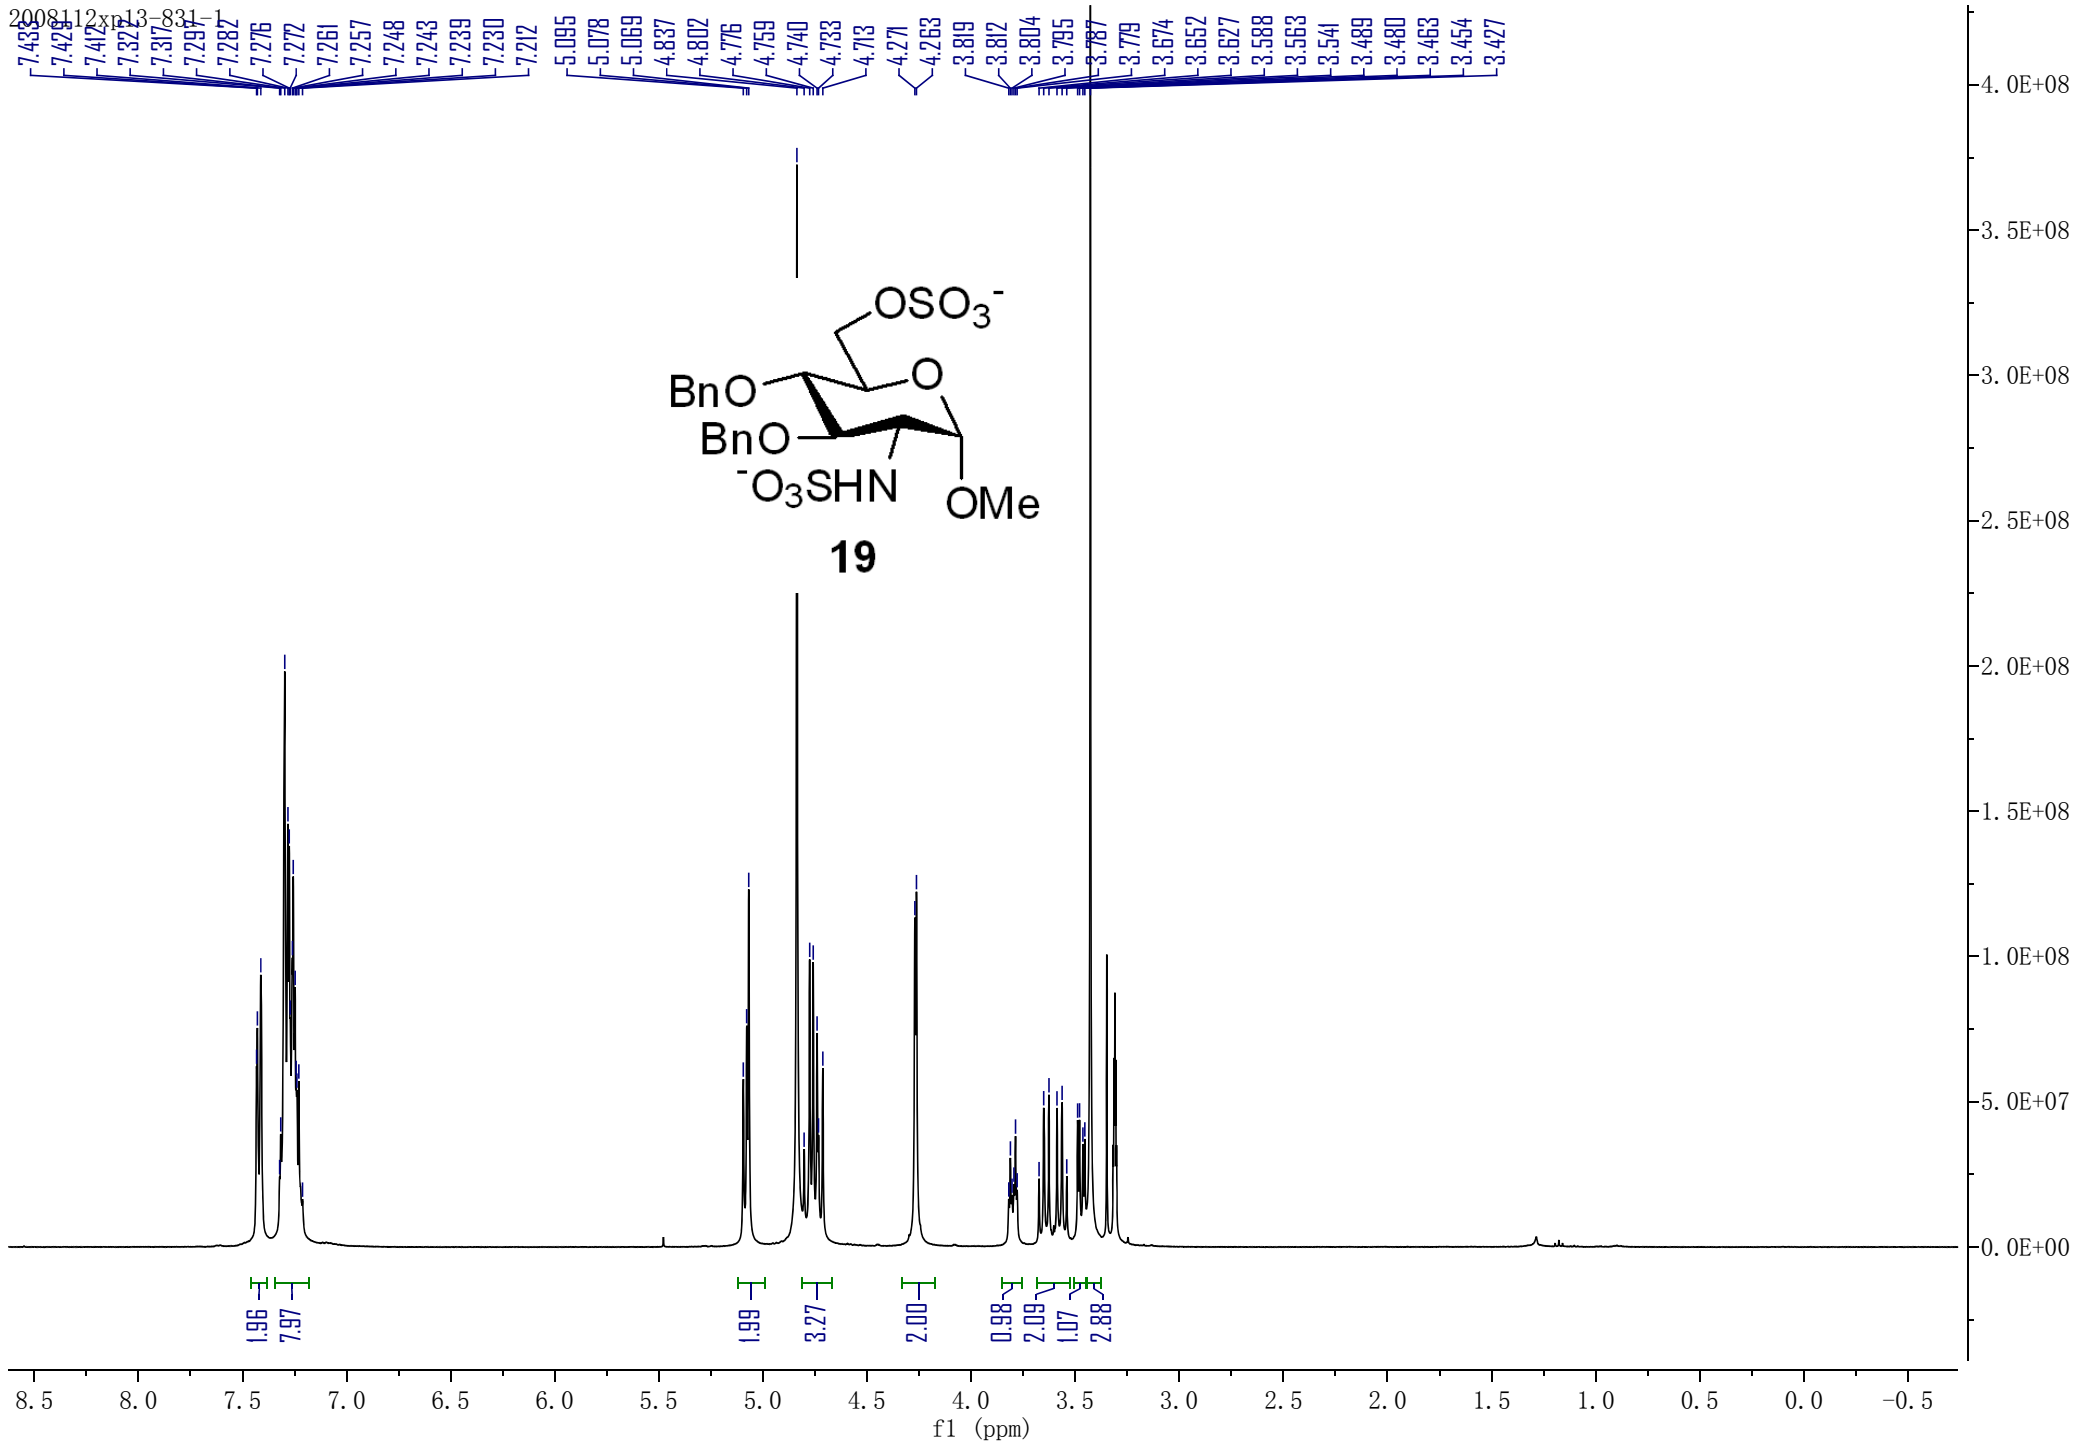

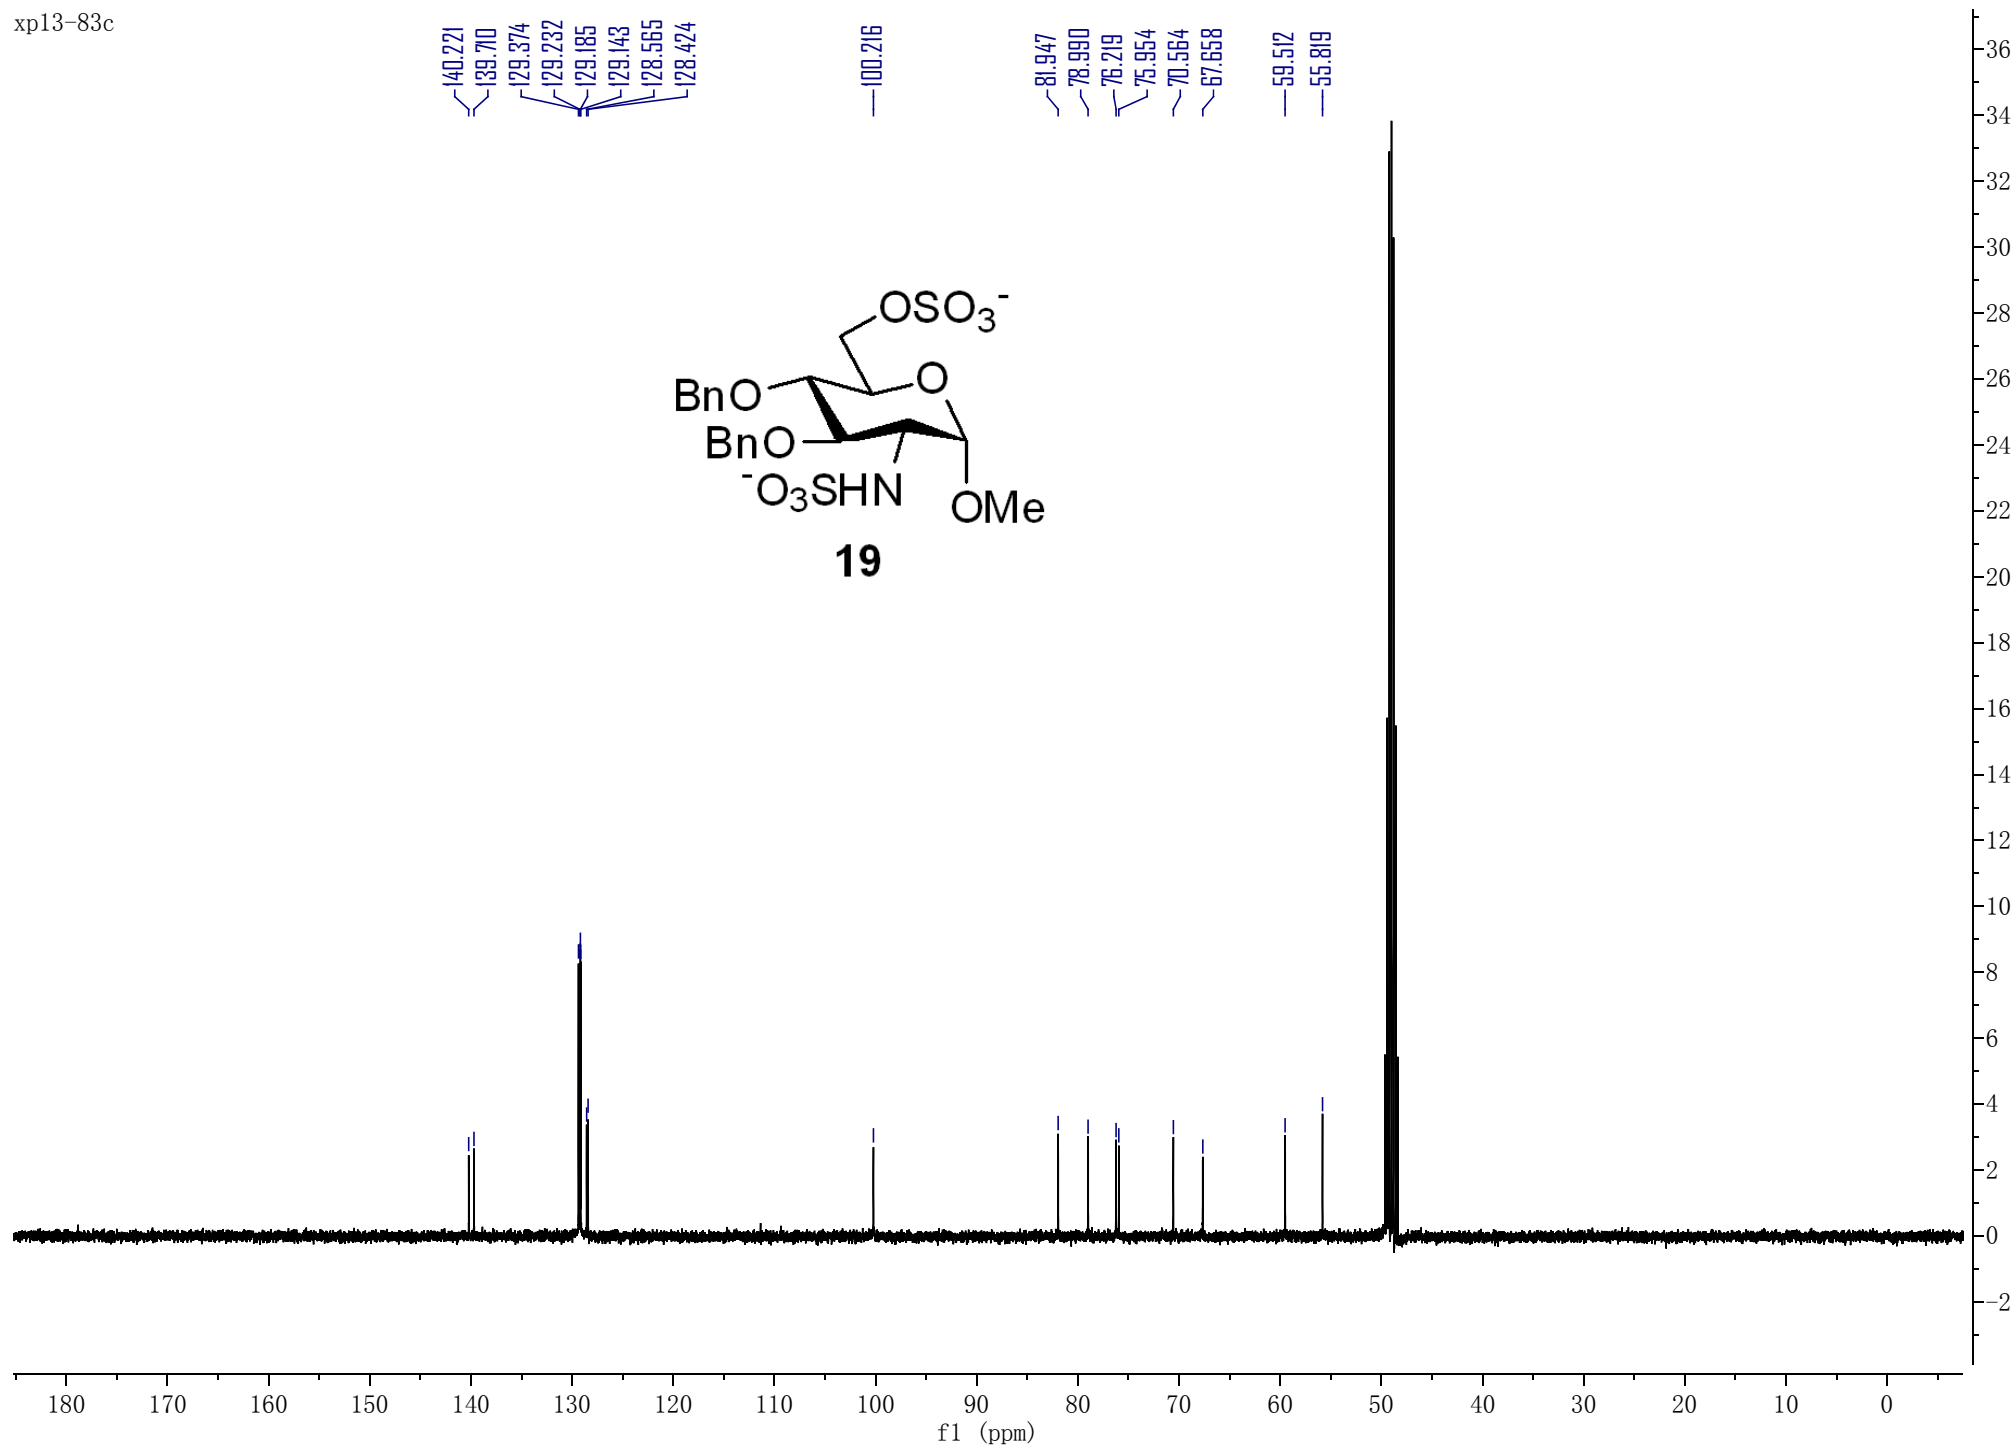

2008112xp13-321

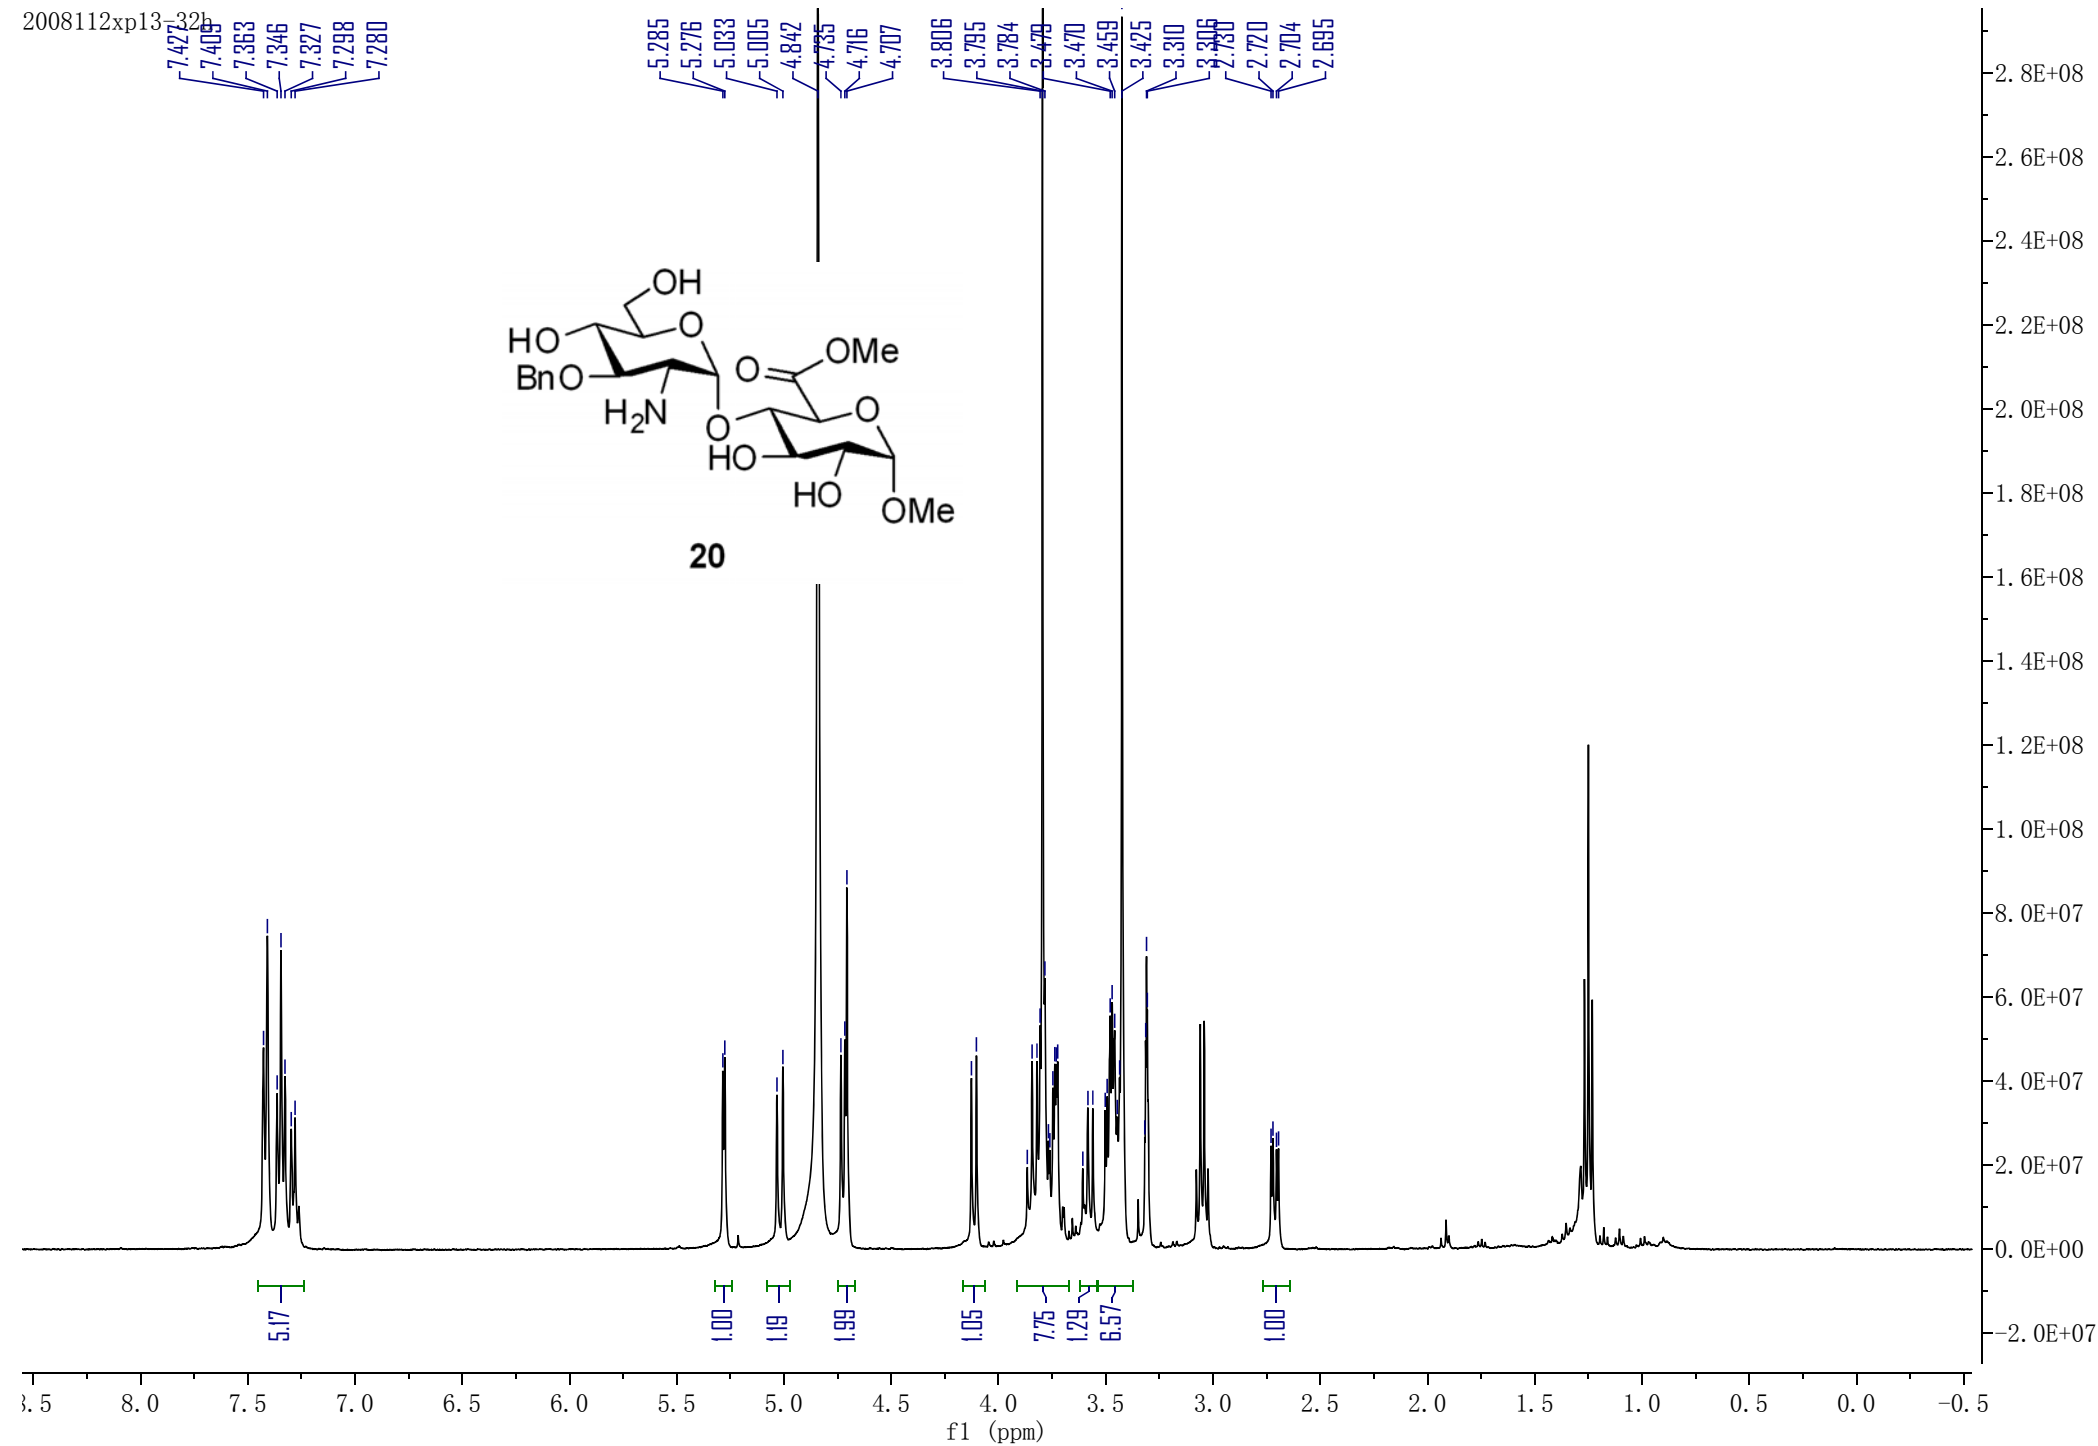

2012年10月

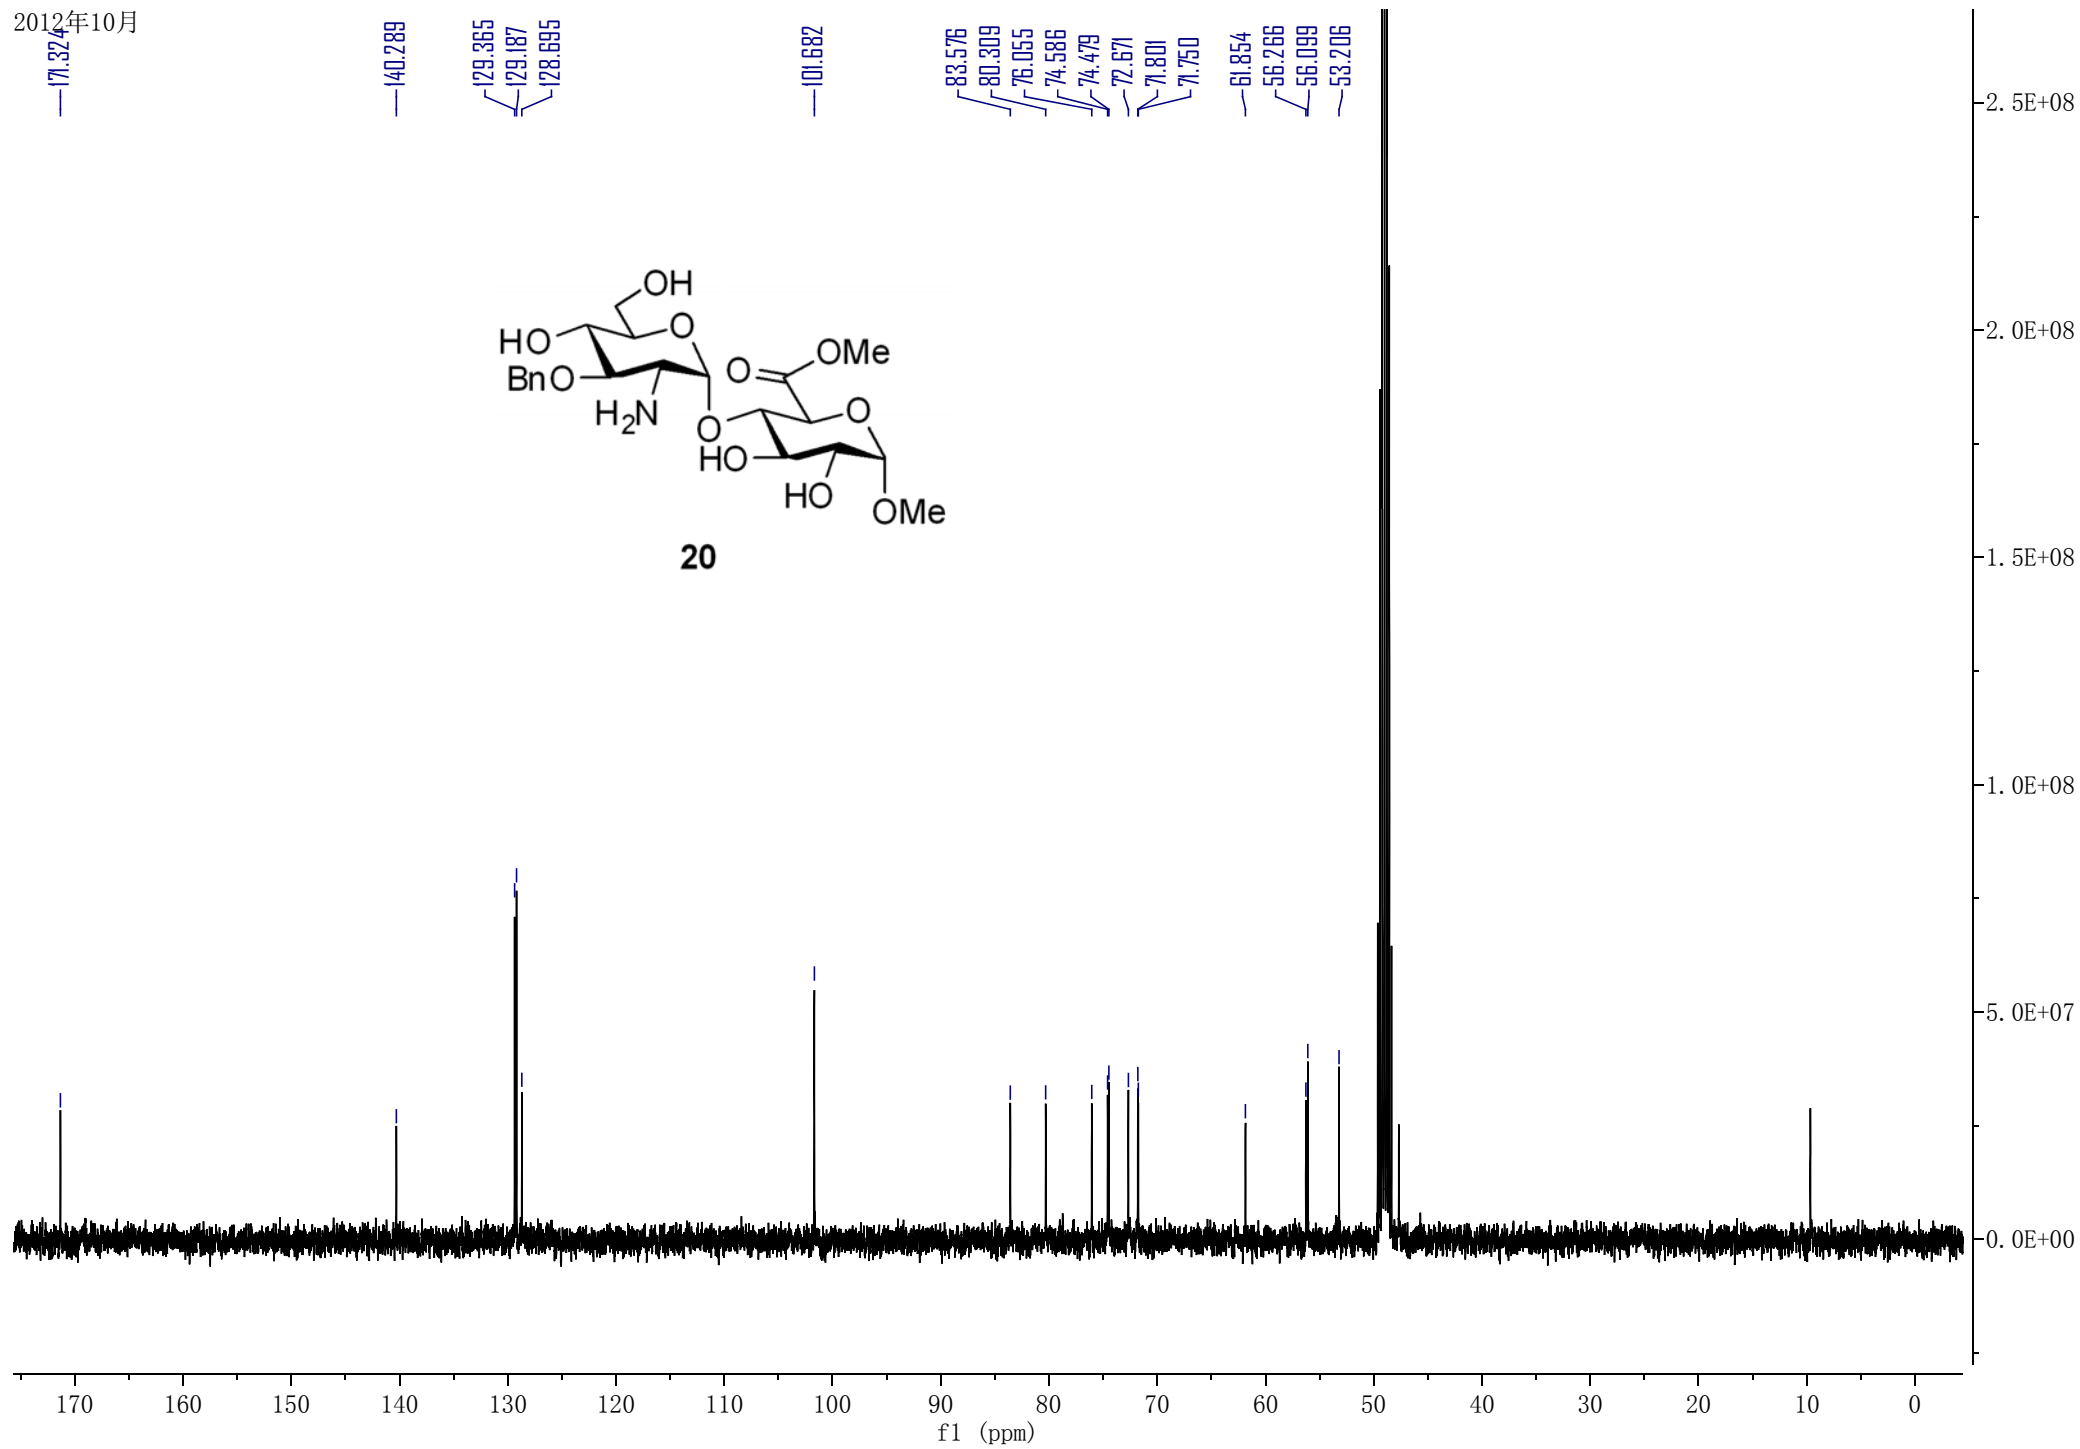

2008112613-431

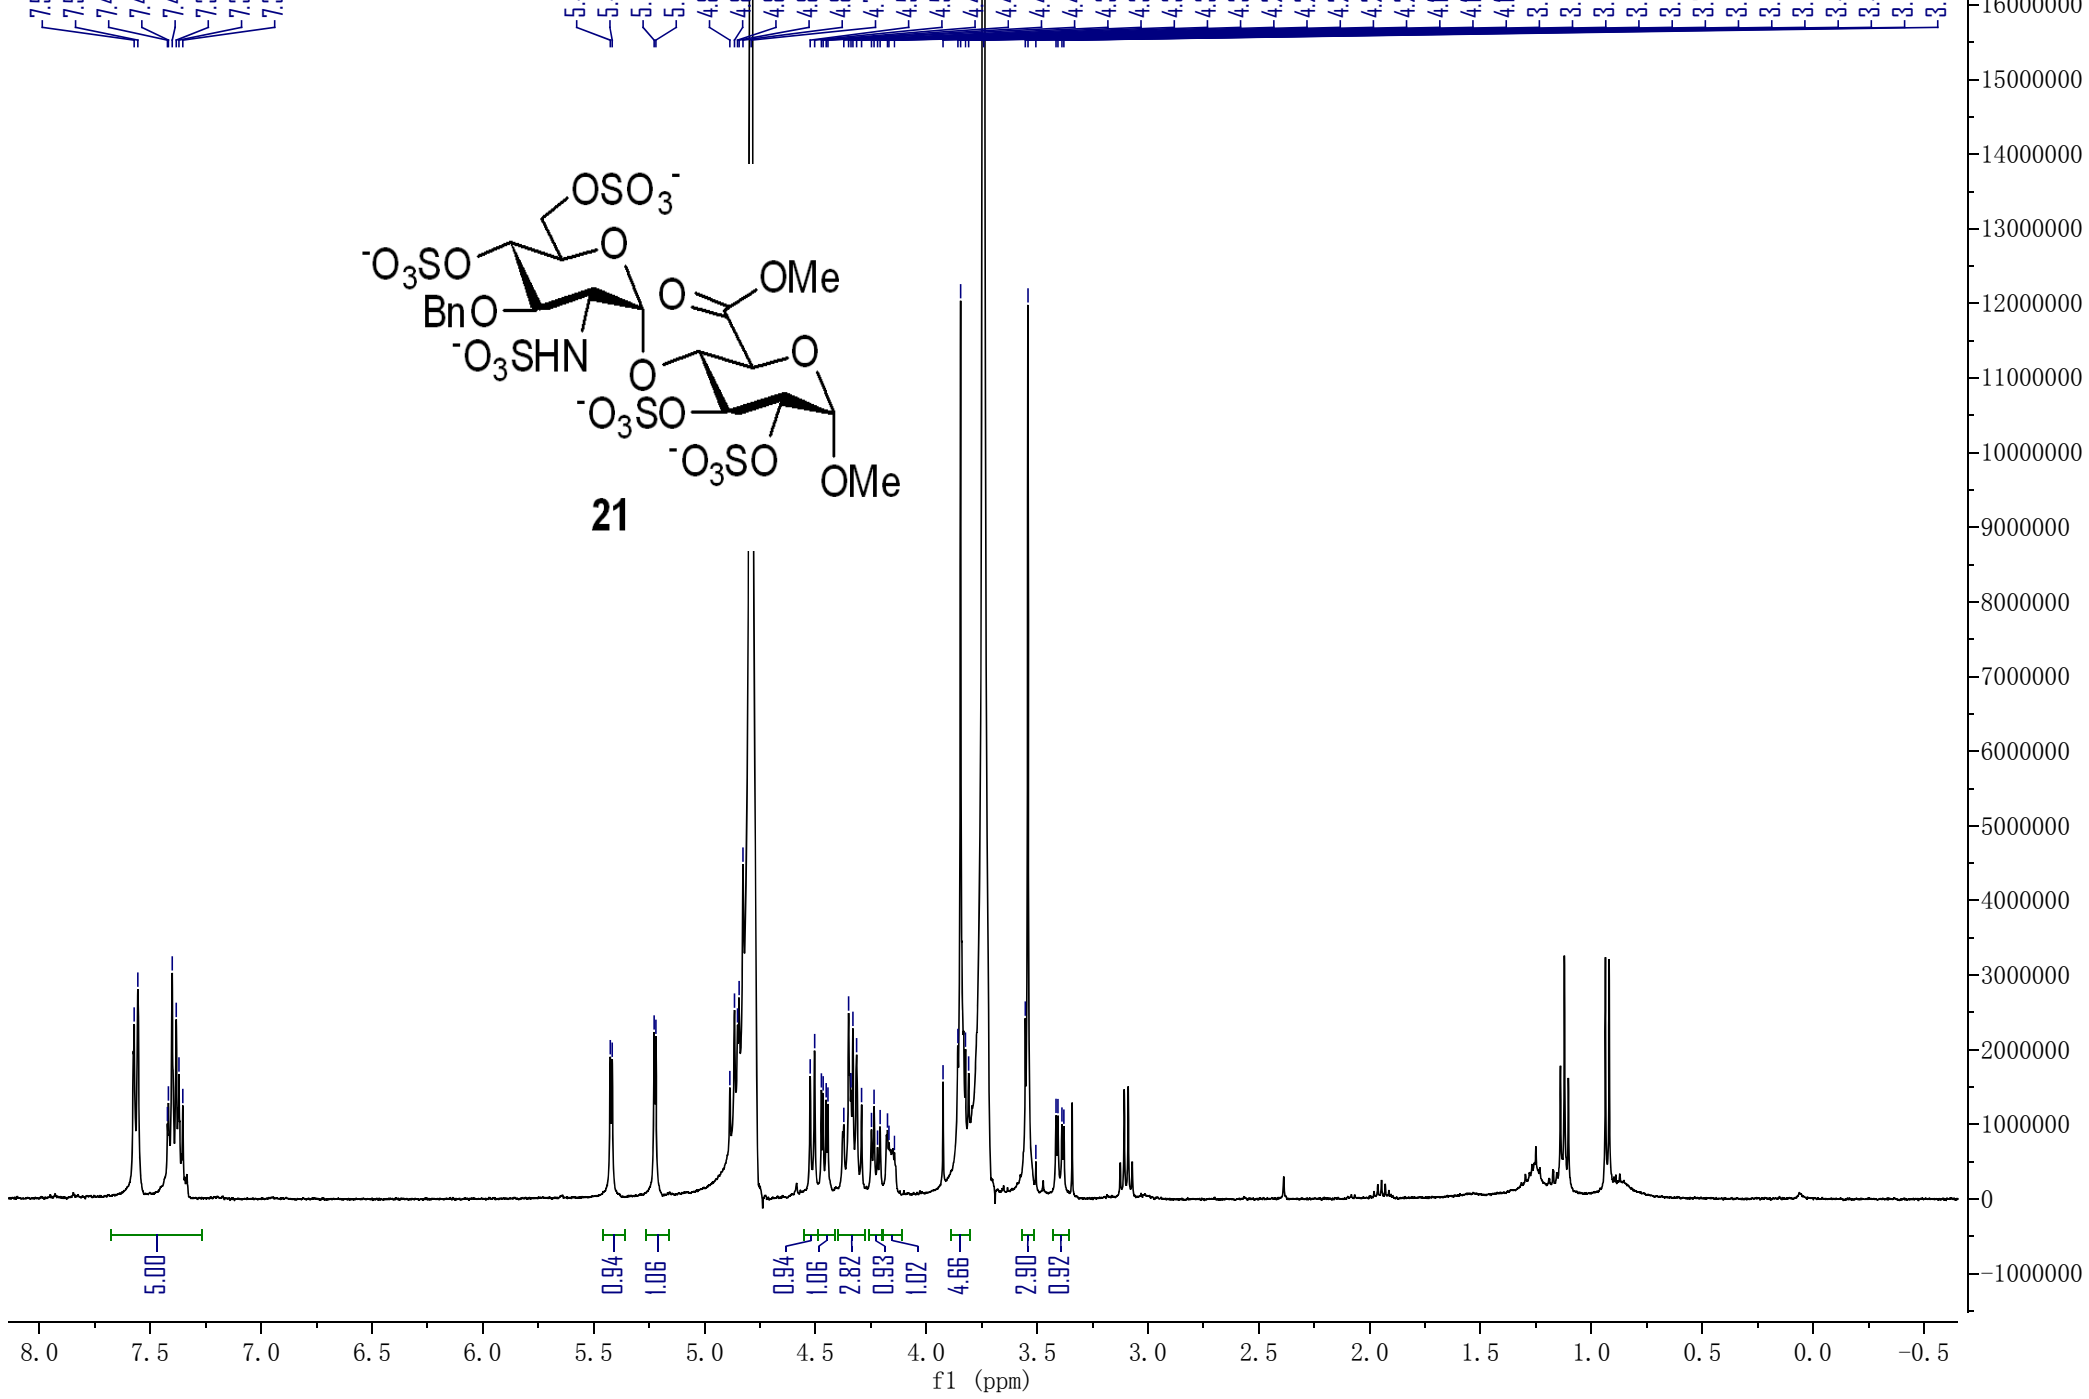

xp13-37--c  
Gradient Shimming

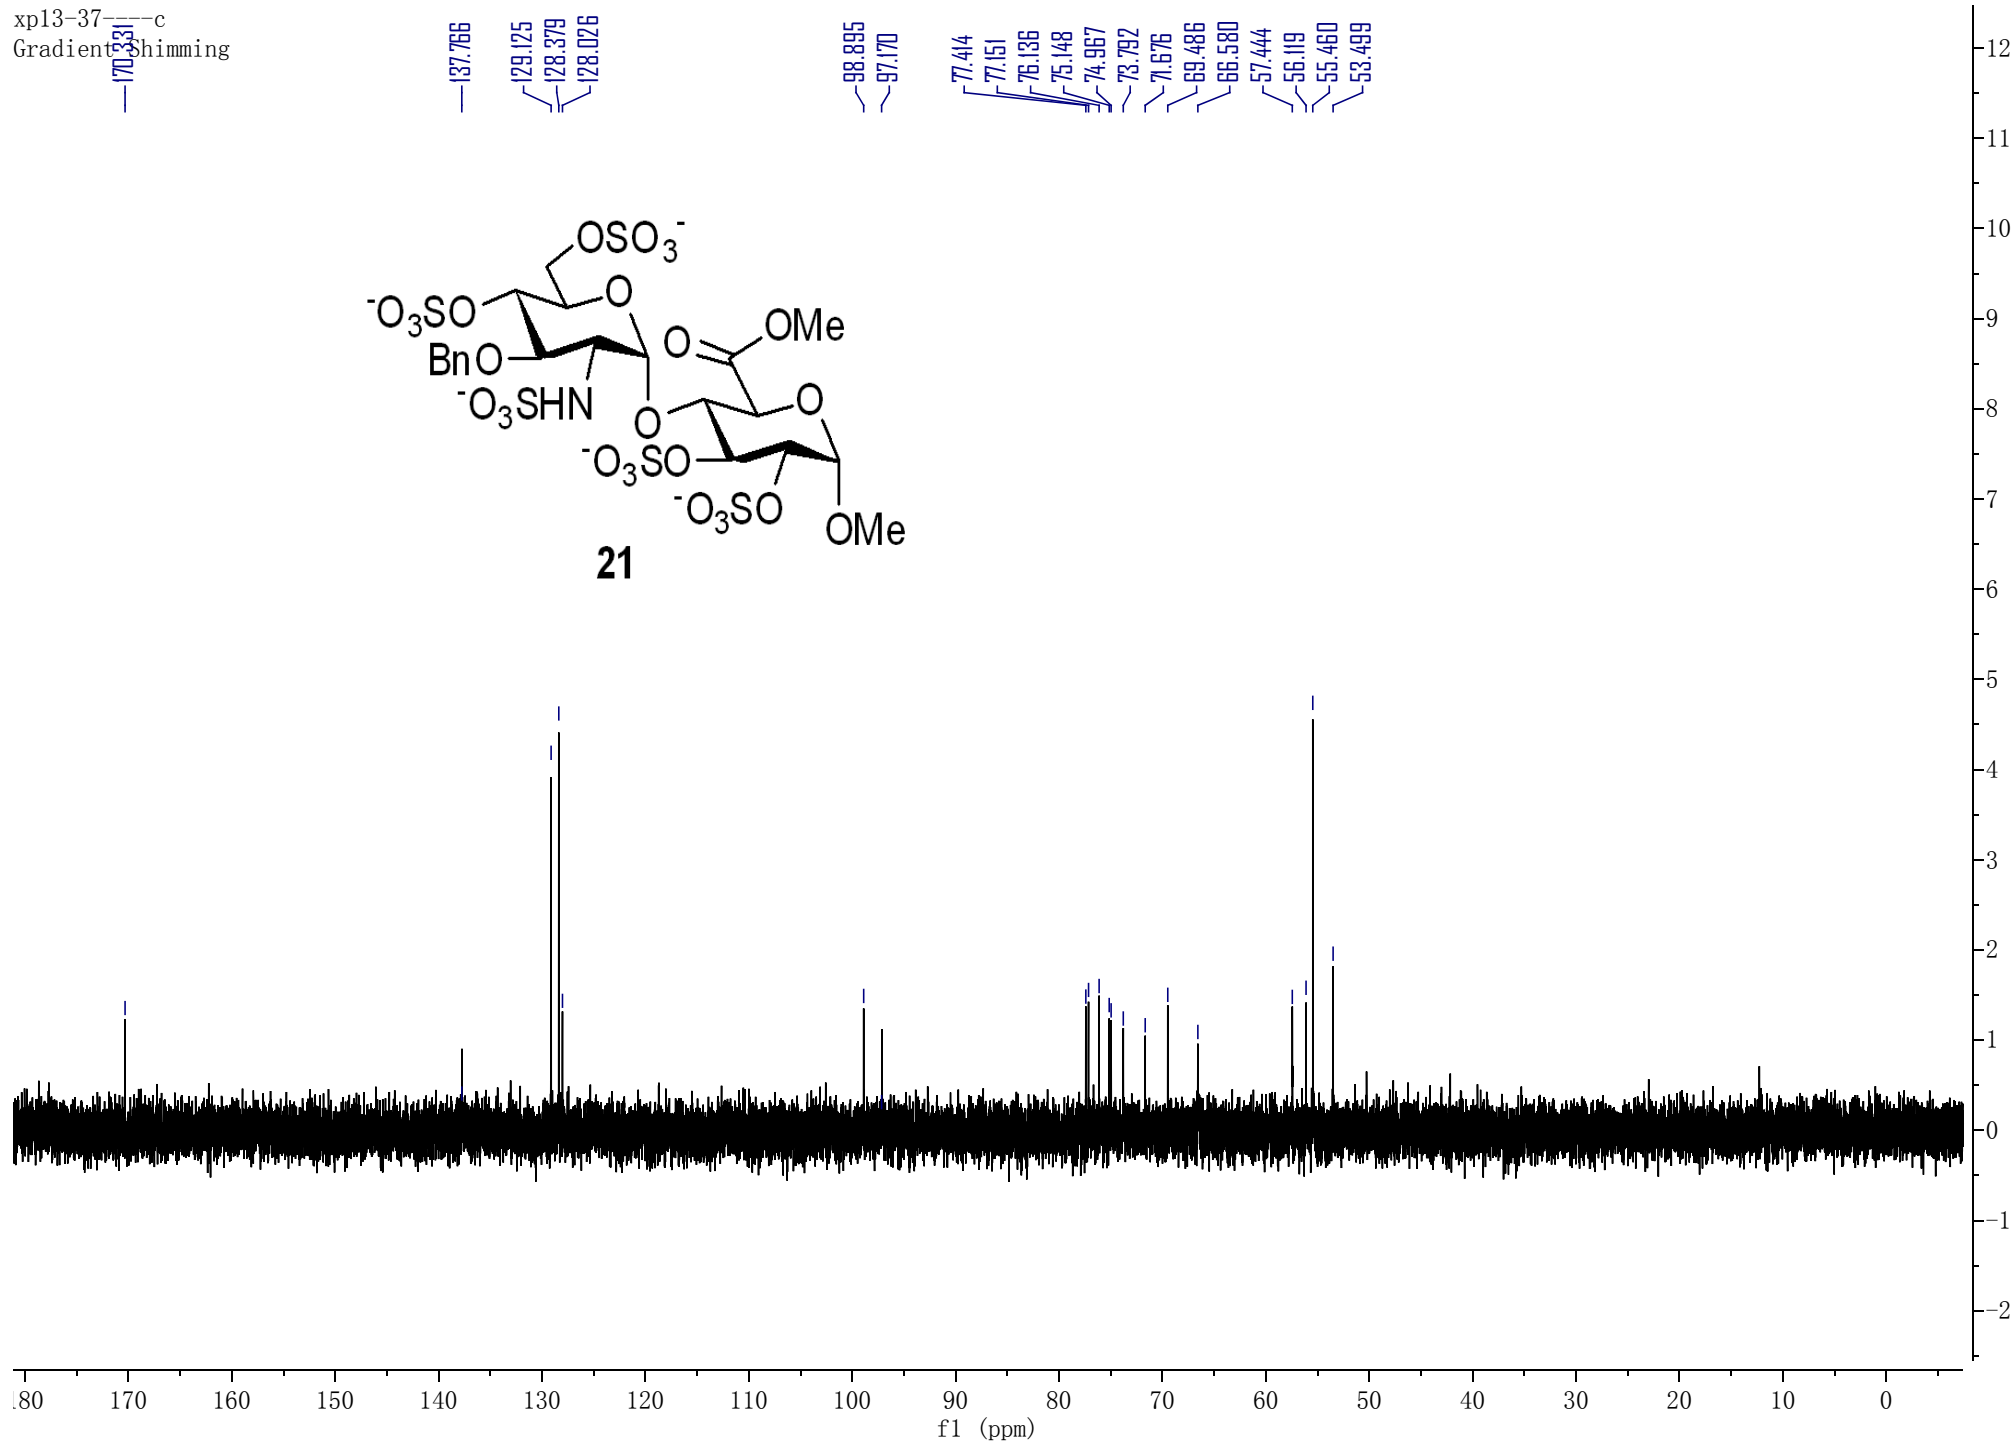

180 170 160 150 140 130 120 110 100 90 80 70 60 50 40 30 20 10 0  
f1 (ppm)



7.452 7.433 7.377 7.359 7.340 7.310 7.292 7.274 7.238 7.041 7.018 6.854 6.831  
 5.473 5.467  
 4.921 4.915 4.869 4.839  
 4.011 3.949 3.767 3.745 3.348 3.329 3.310 3.305 2.617 2.609 2.592 2.584

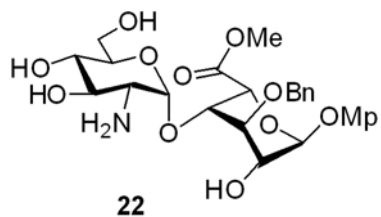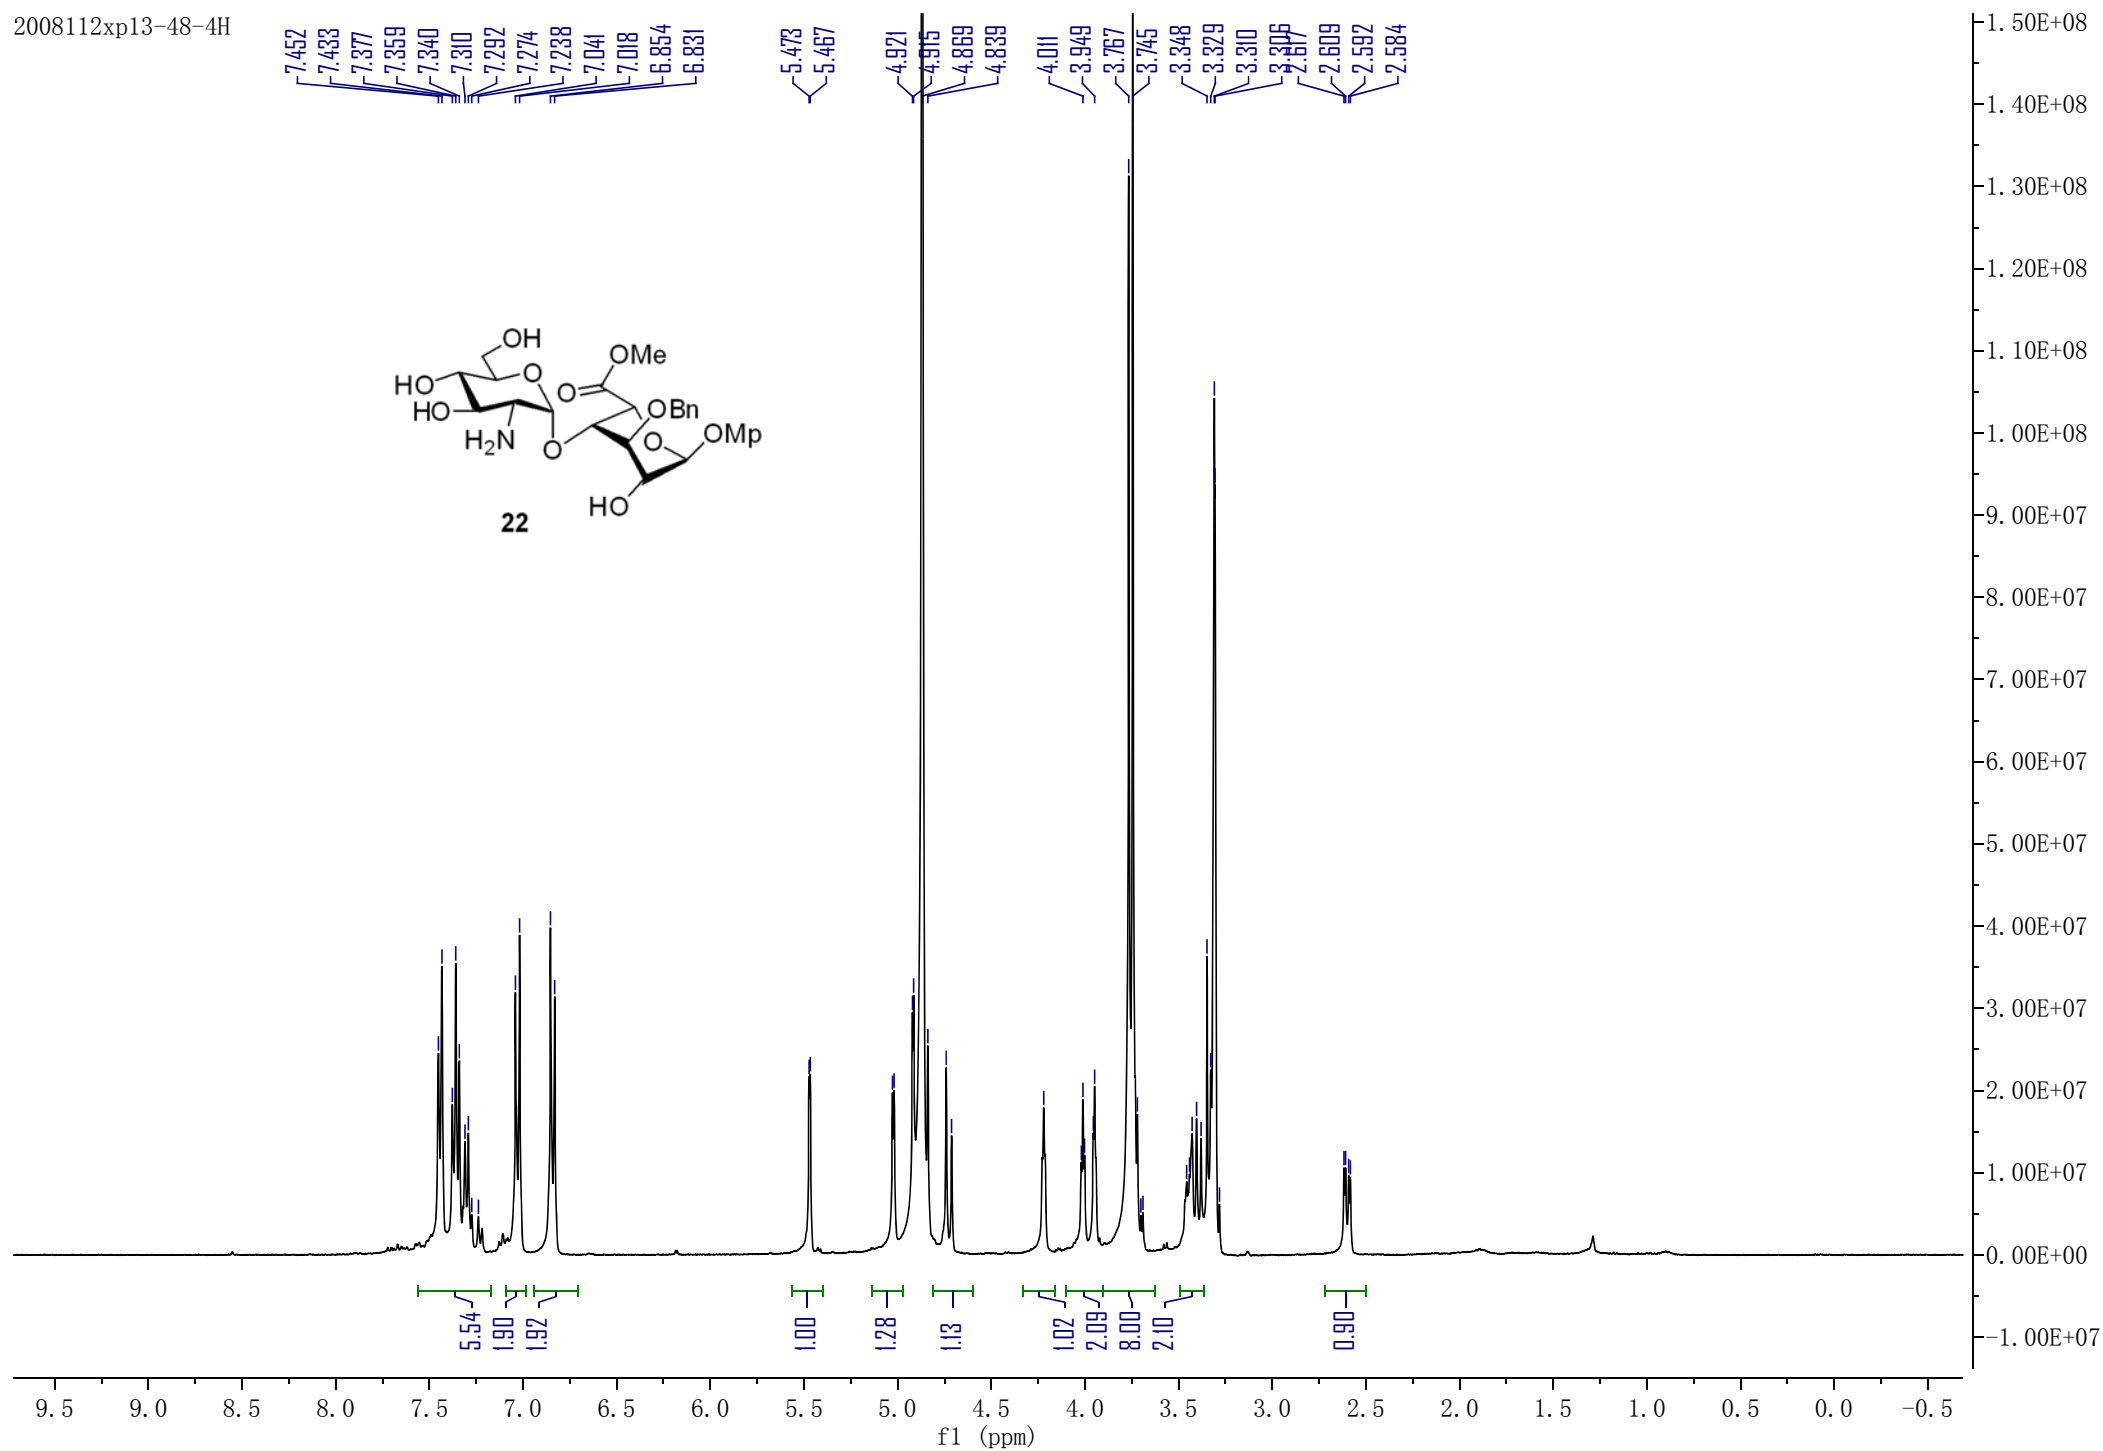

xp13-48c  
Ethylindanone standard test sample  
Recorded on 400-MR with OneNMR probe and PZ4

171.450  
156.578  
152.223  
133.784  
133.756  
133.112  
133.011  
130.032  
129.910  
129.422  
118.958  
118.950  
115.595

101.756  
99.099

75.755  
75.128  
74.633  
73.377  
73.330  
71.530  
69.942  
69.007  
62.404  
57.027  
56.021  
52.924

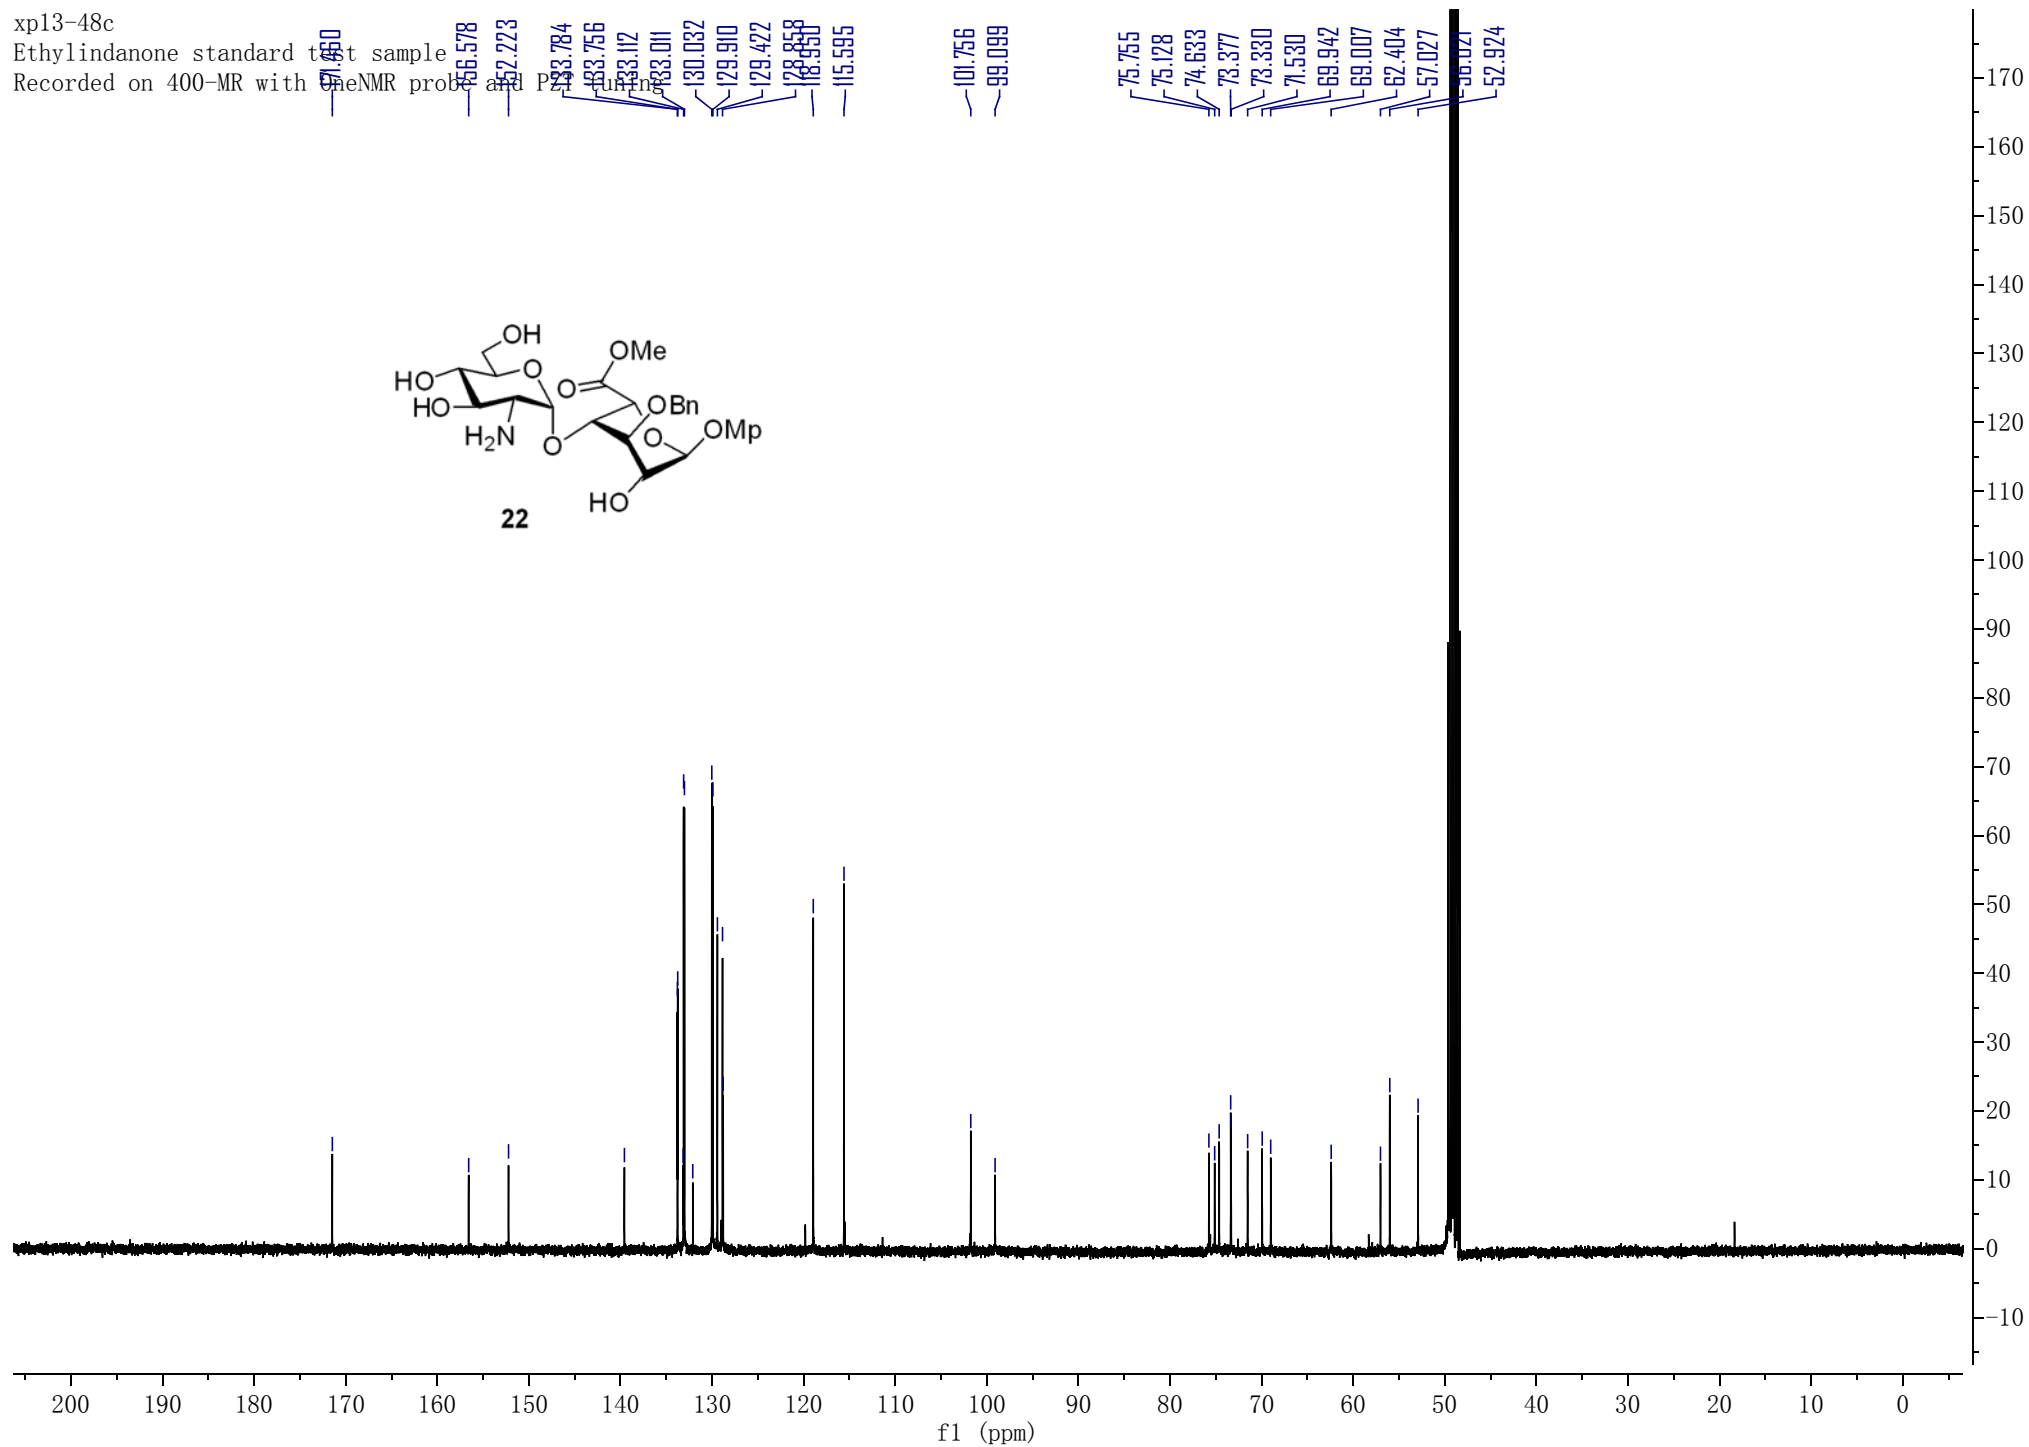

2008112XP14-5F

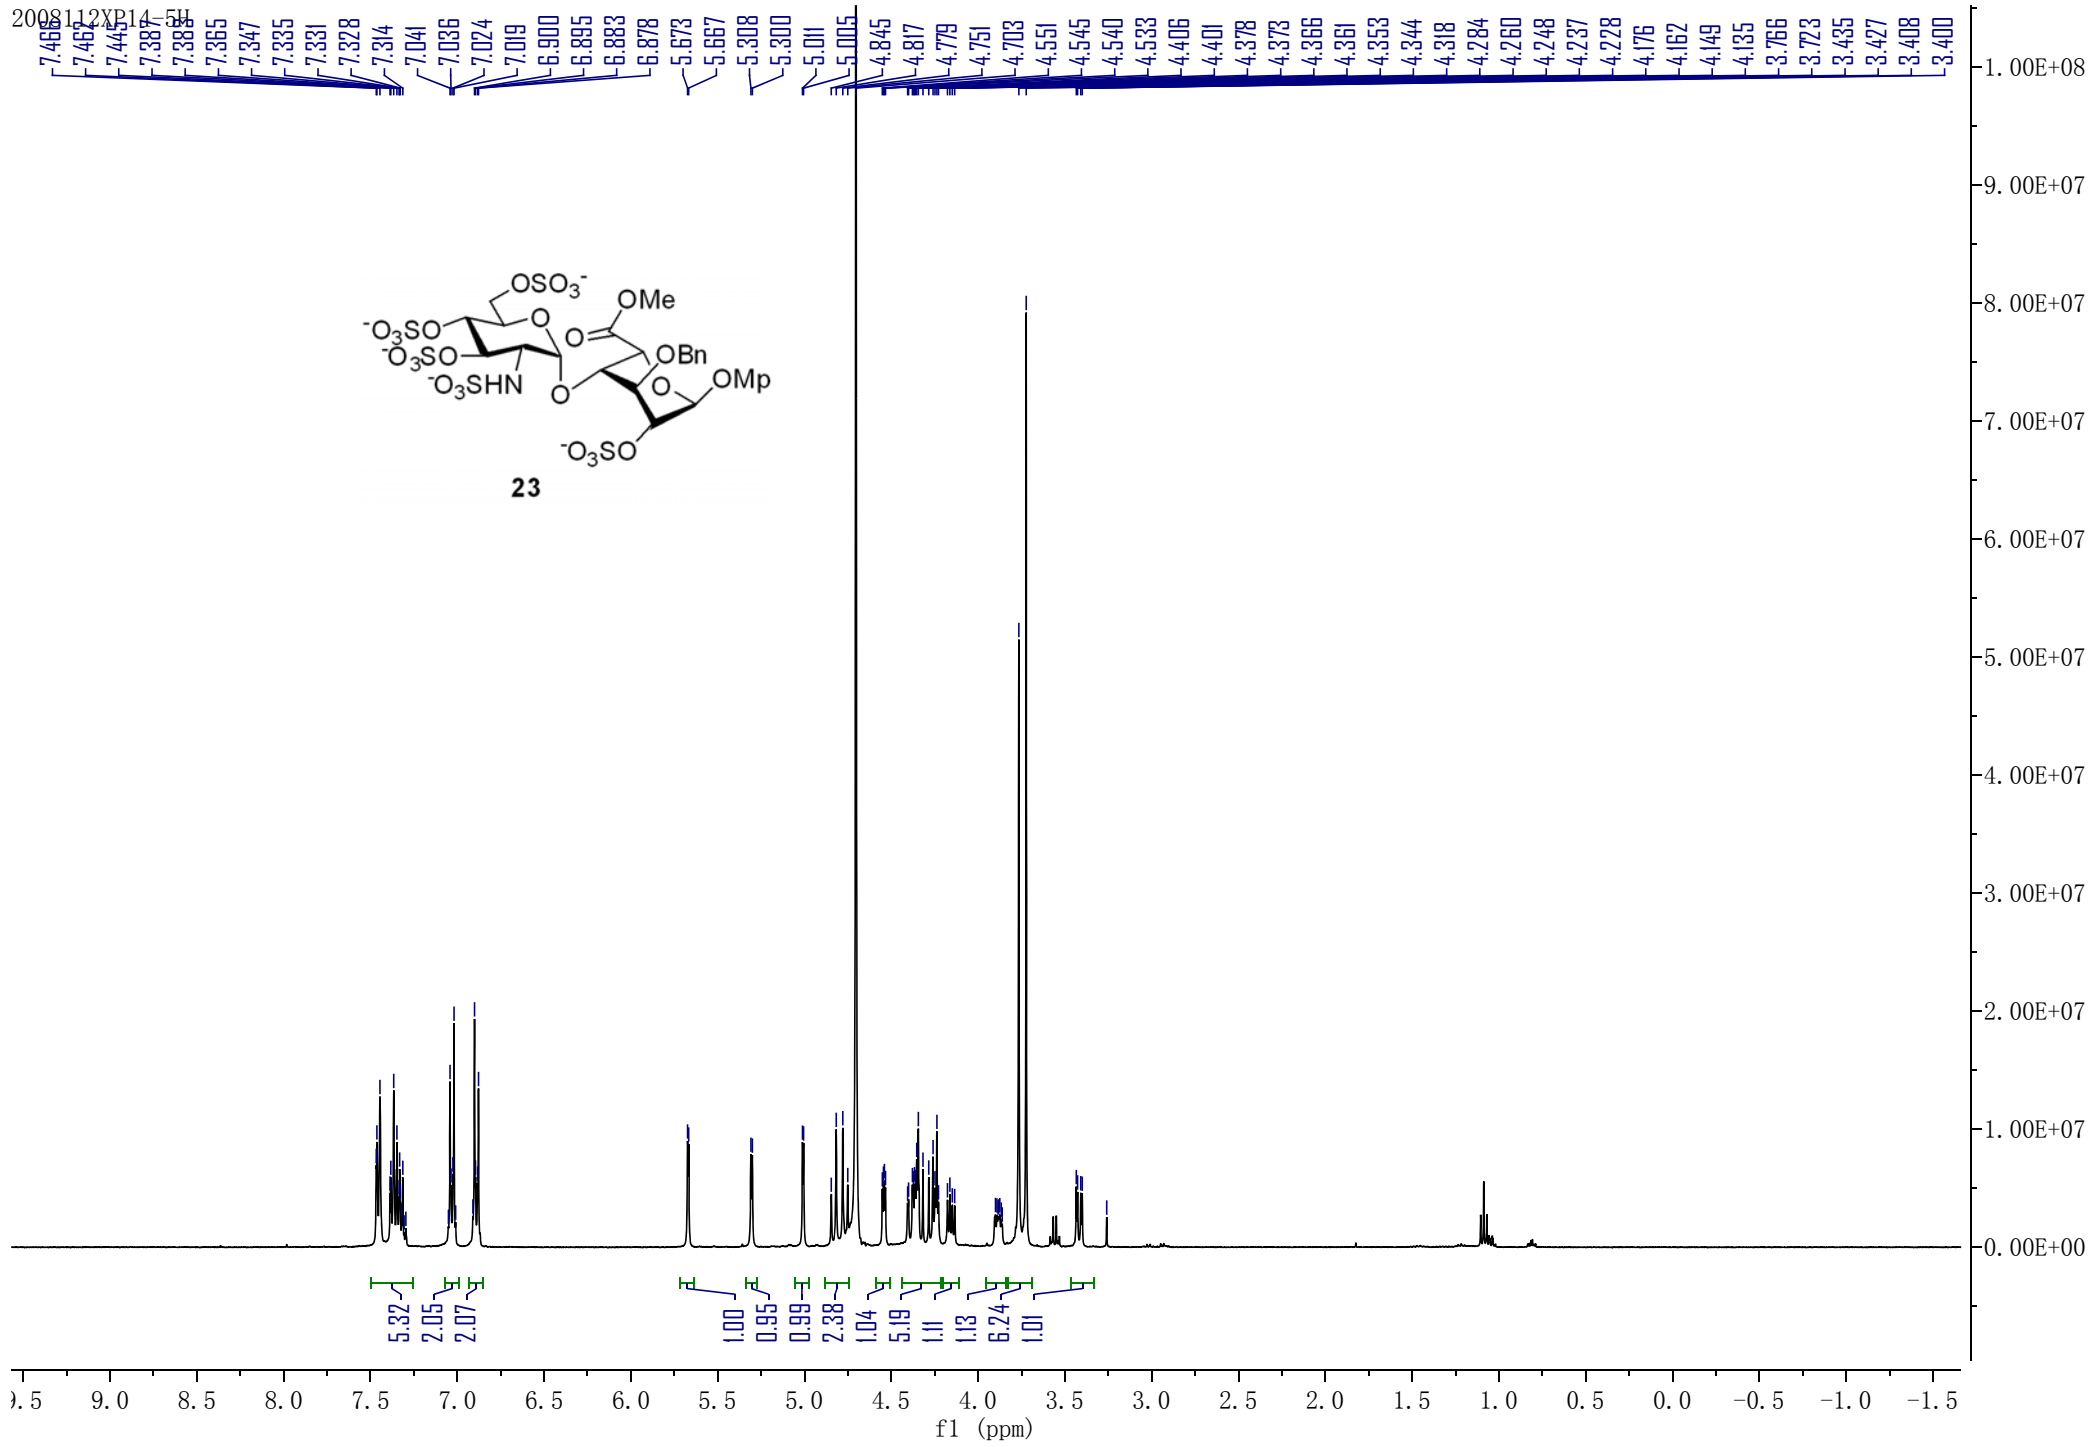

2012年12月

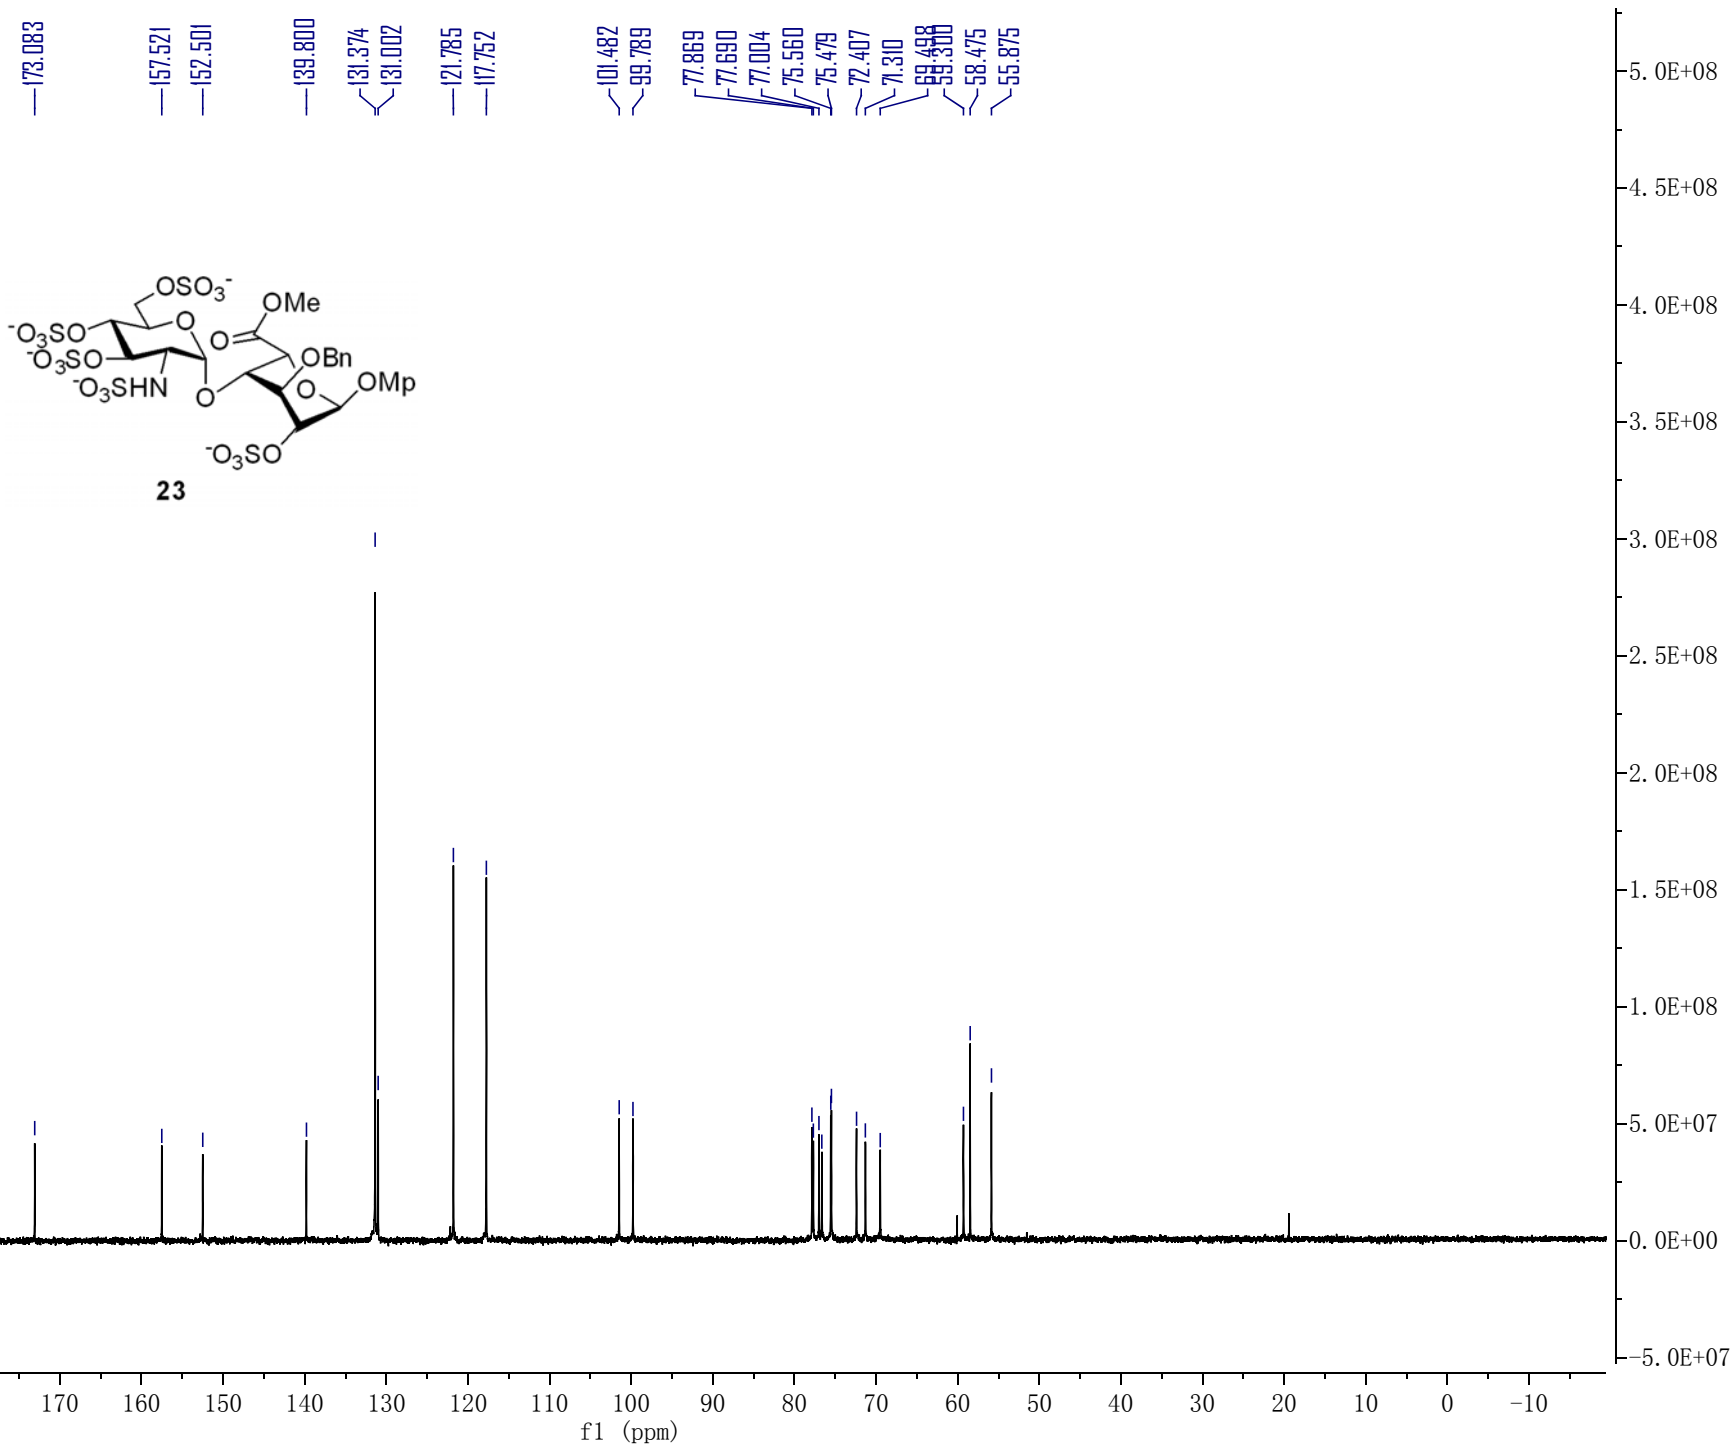

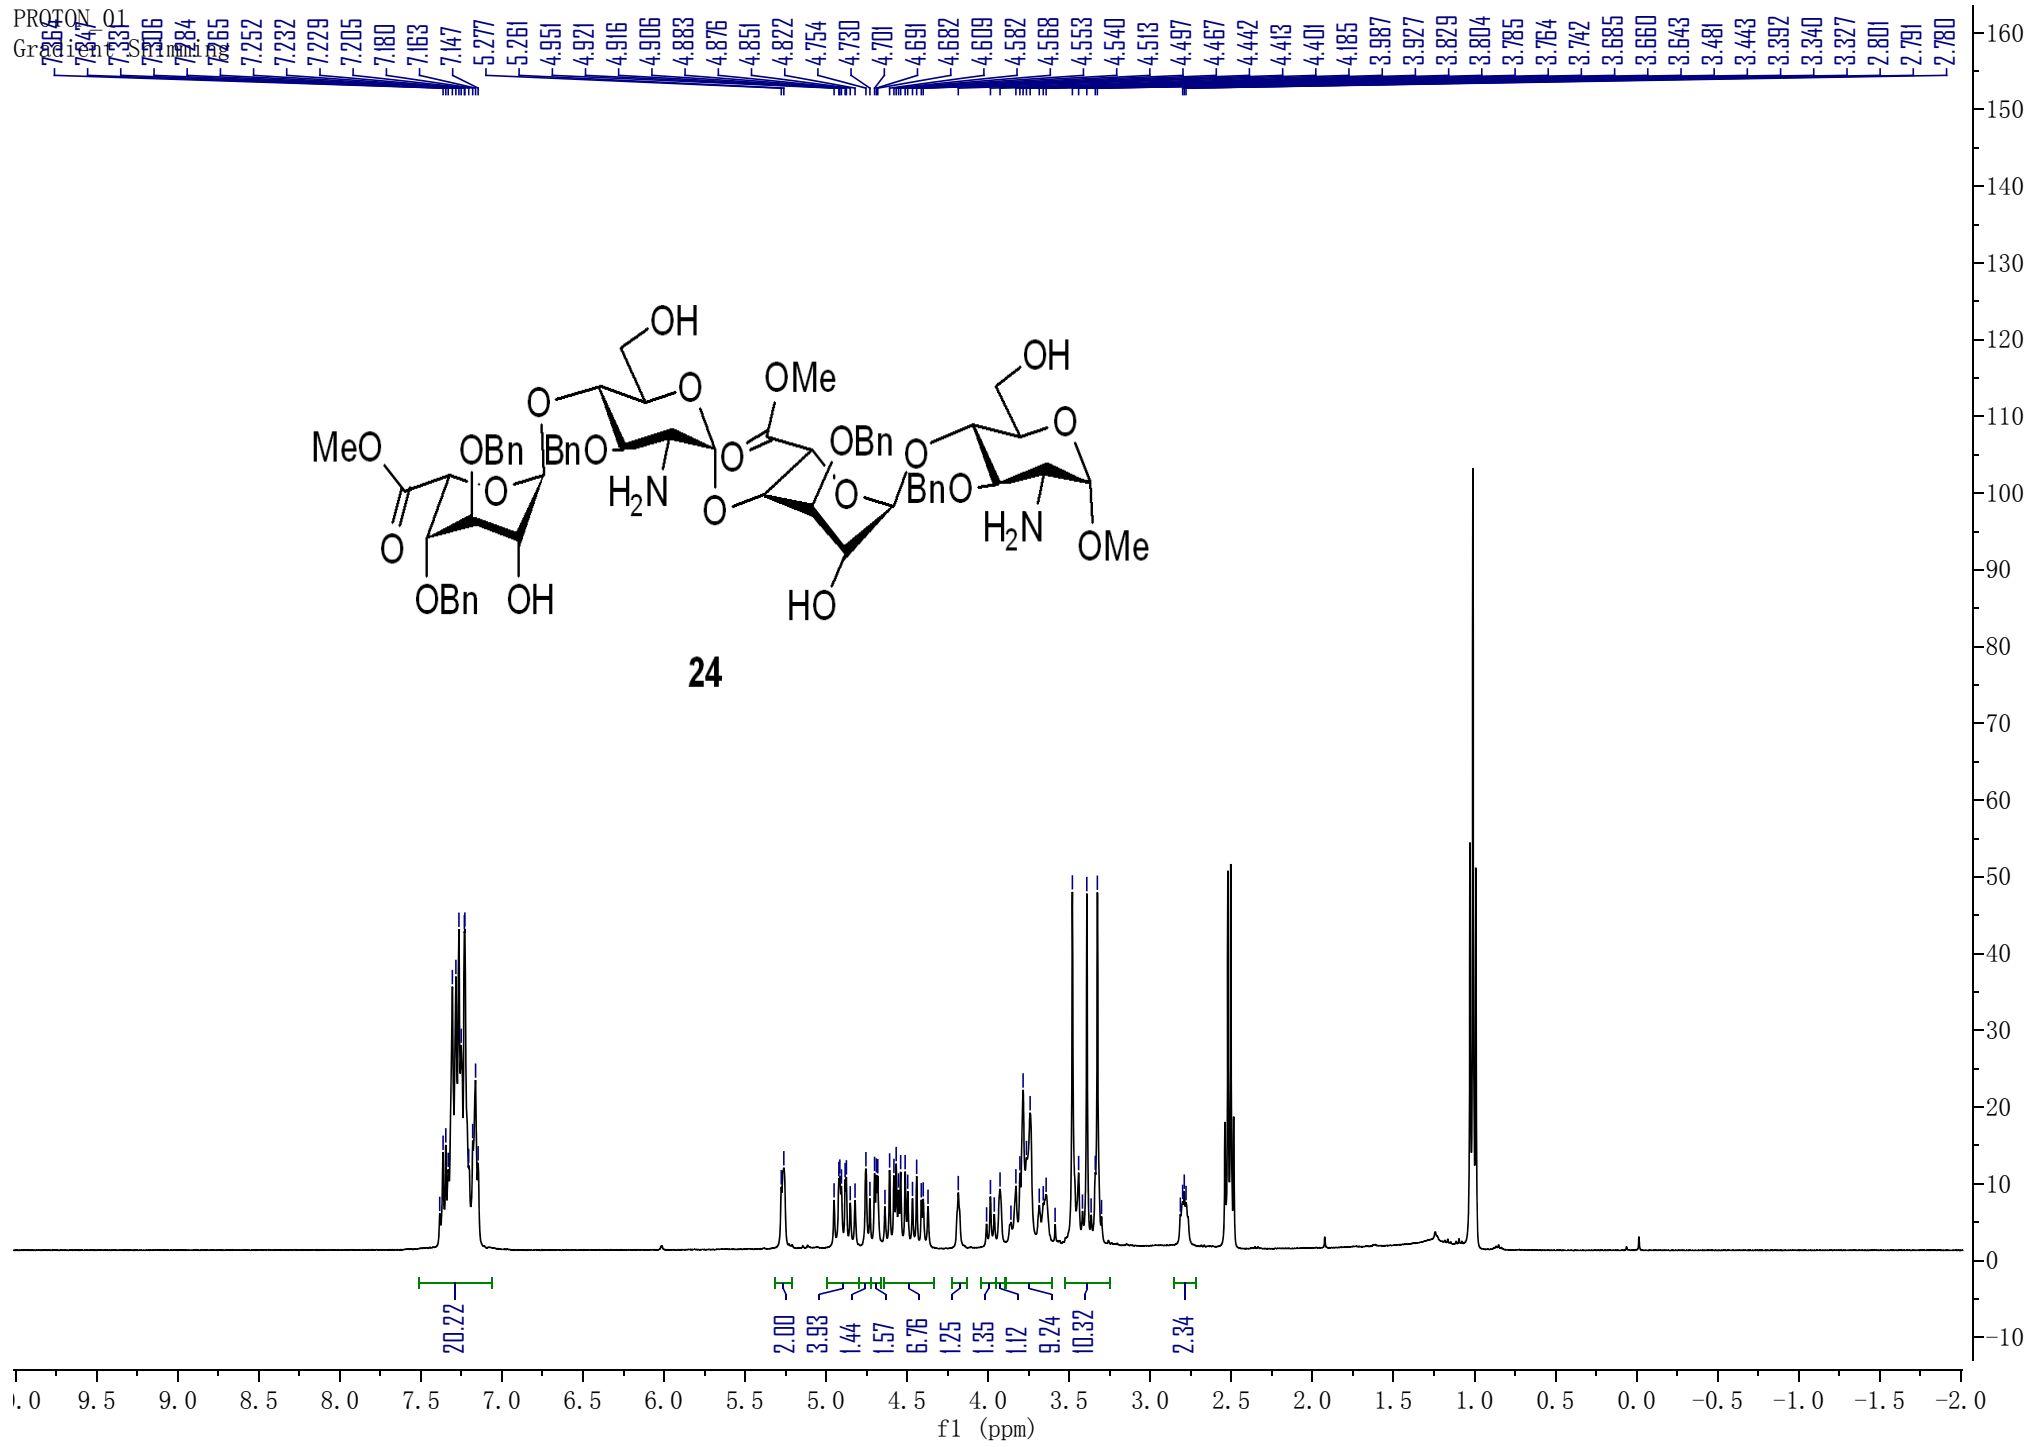

CARBON\_01  
2008112xp13-81c

170.089  
169.830

138.693 138.532 137.582 136.770  
128.608 128.475 128.446 128.277 128.182 128.021 127.857 127.697 127.535  
100.983 100.436 96.968 82.001 81.764 77.479 77.160 76.842 75.742 75.320 74.794 74.739 74.687 74.083 72.915 72.776 72.590 72.127 71.875 71.748 69.788 69.234 68.660 68.223 61.139 61.039 55.893 55.223 55.134 51.849

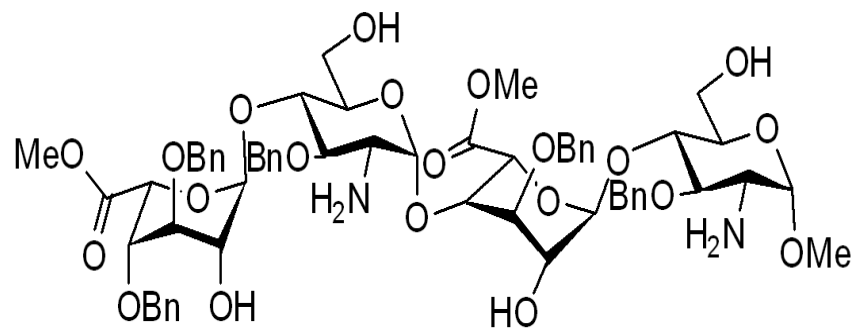

24

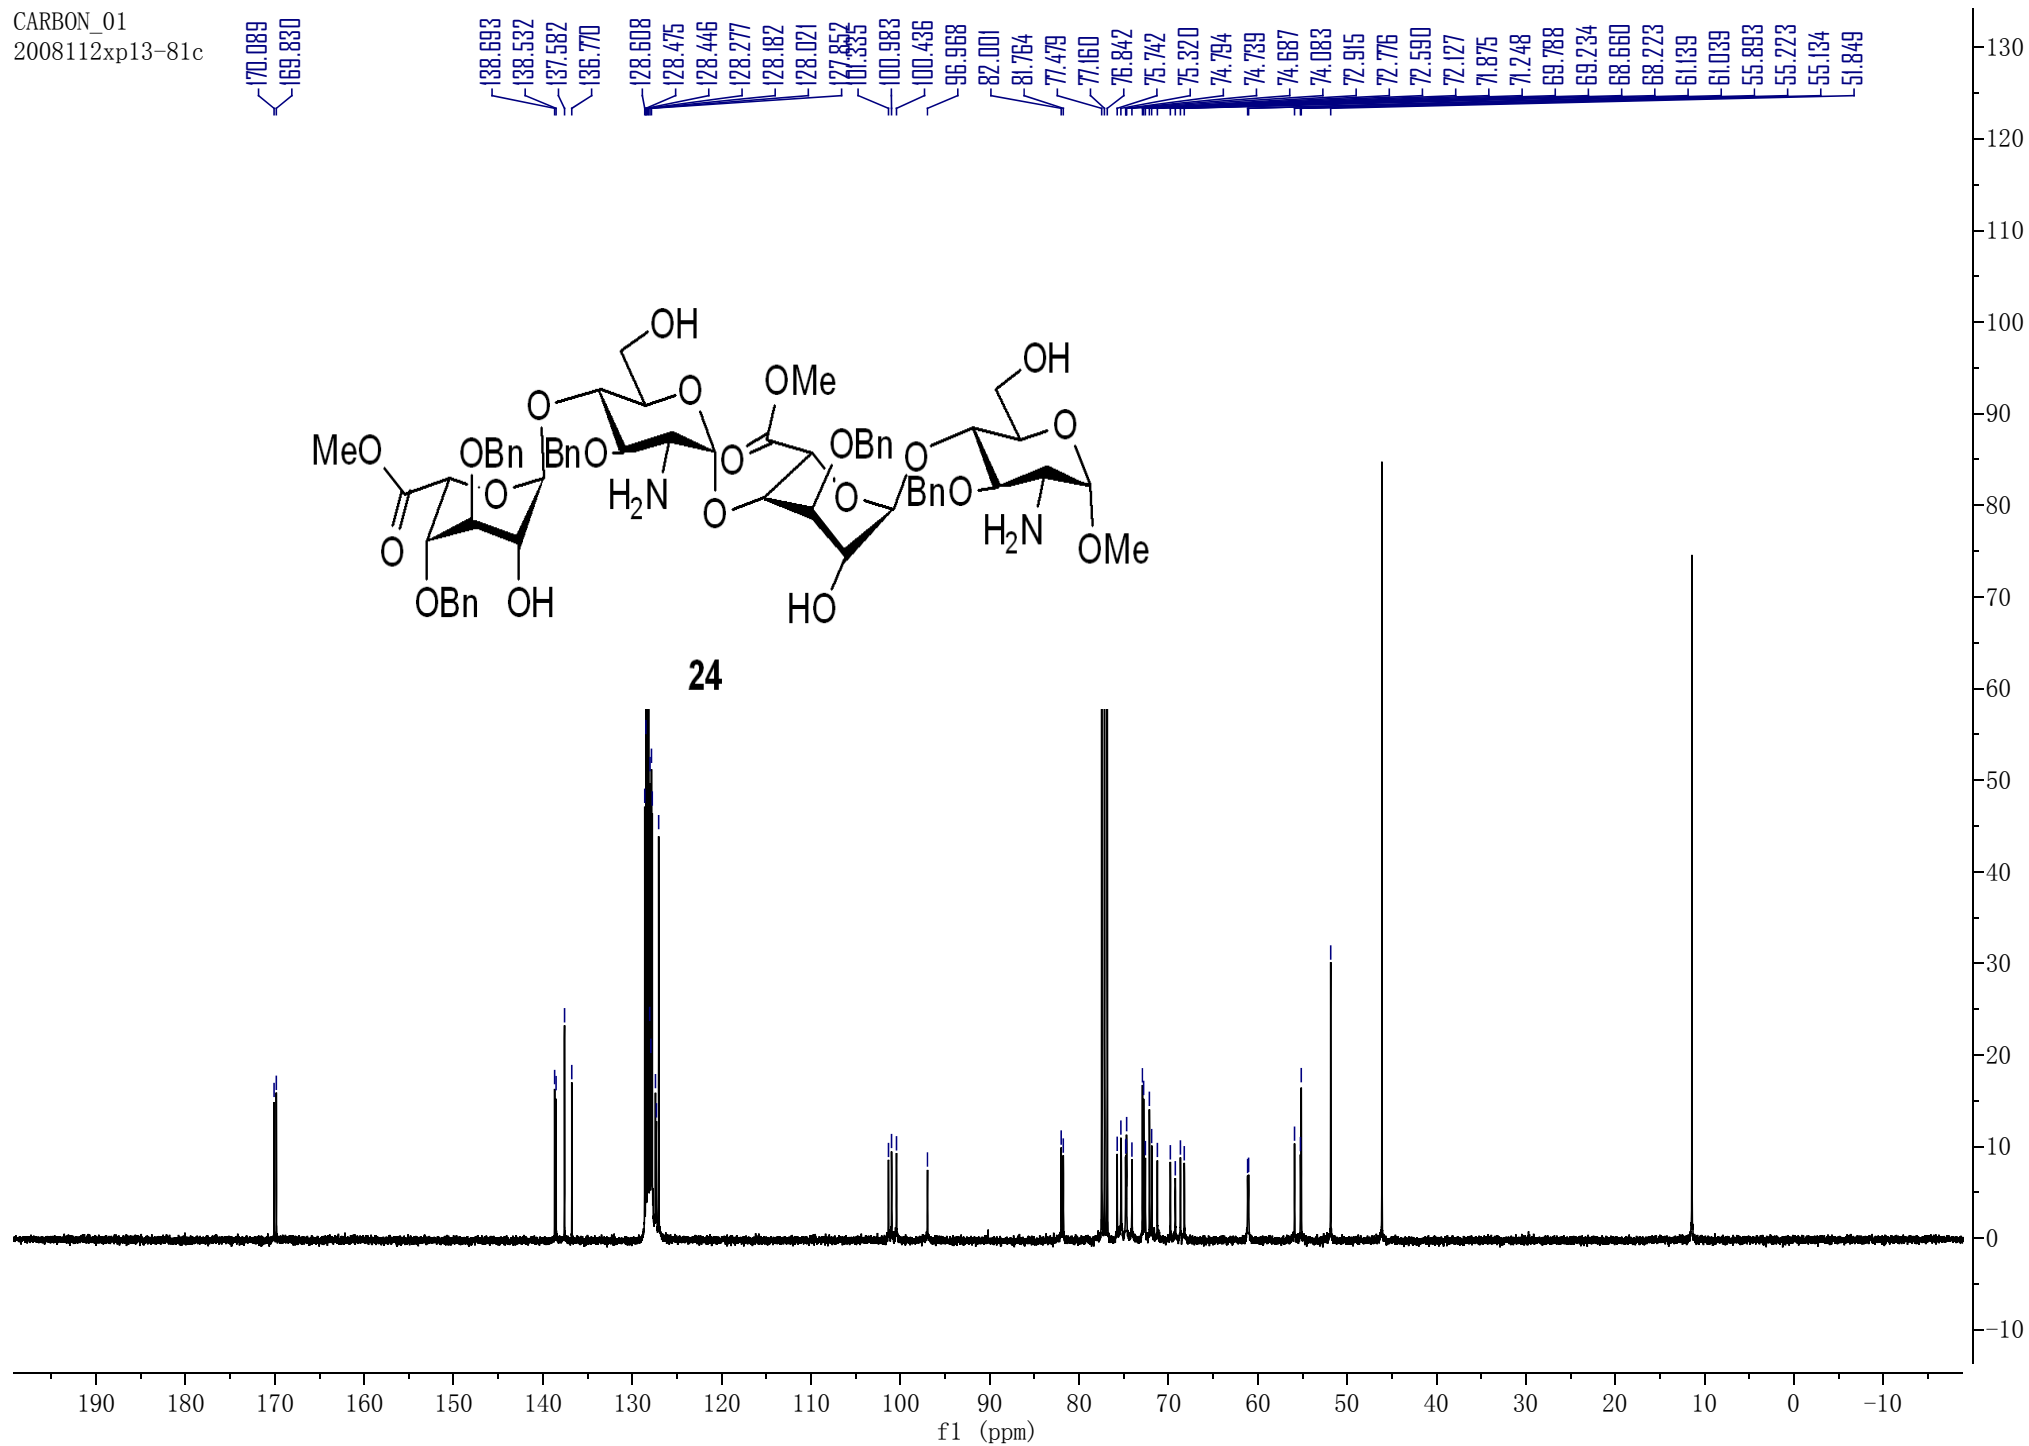

20081221xp13-95H

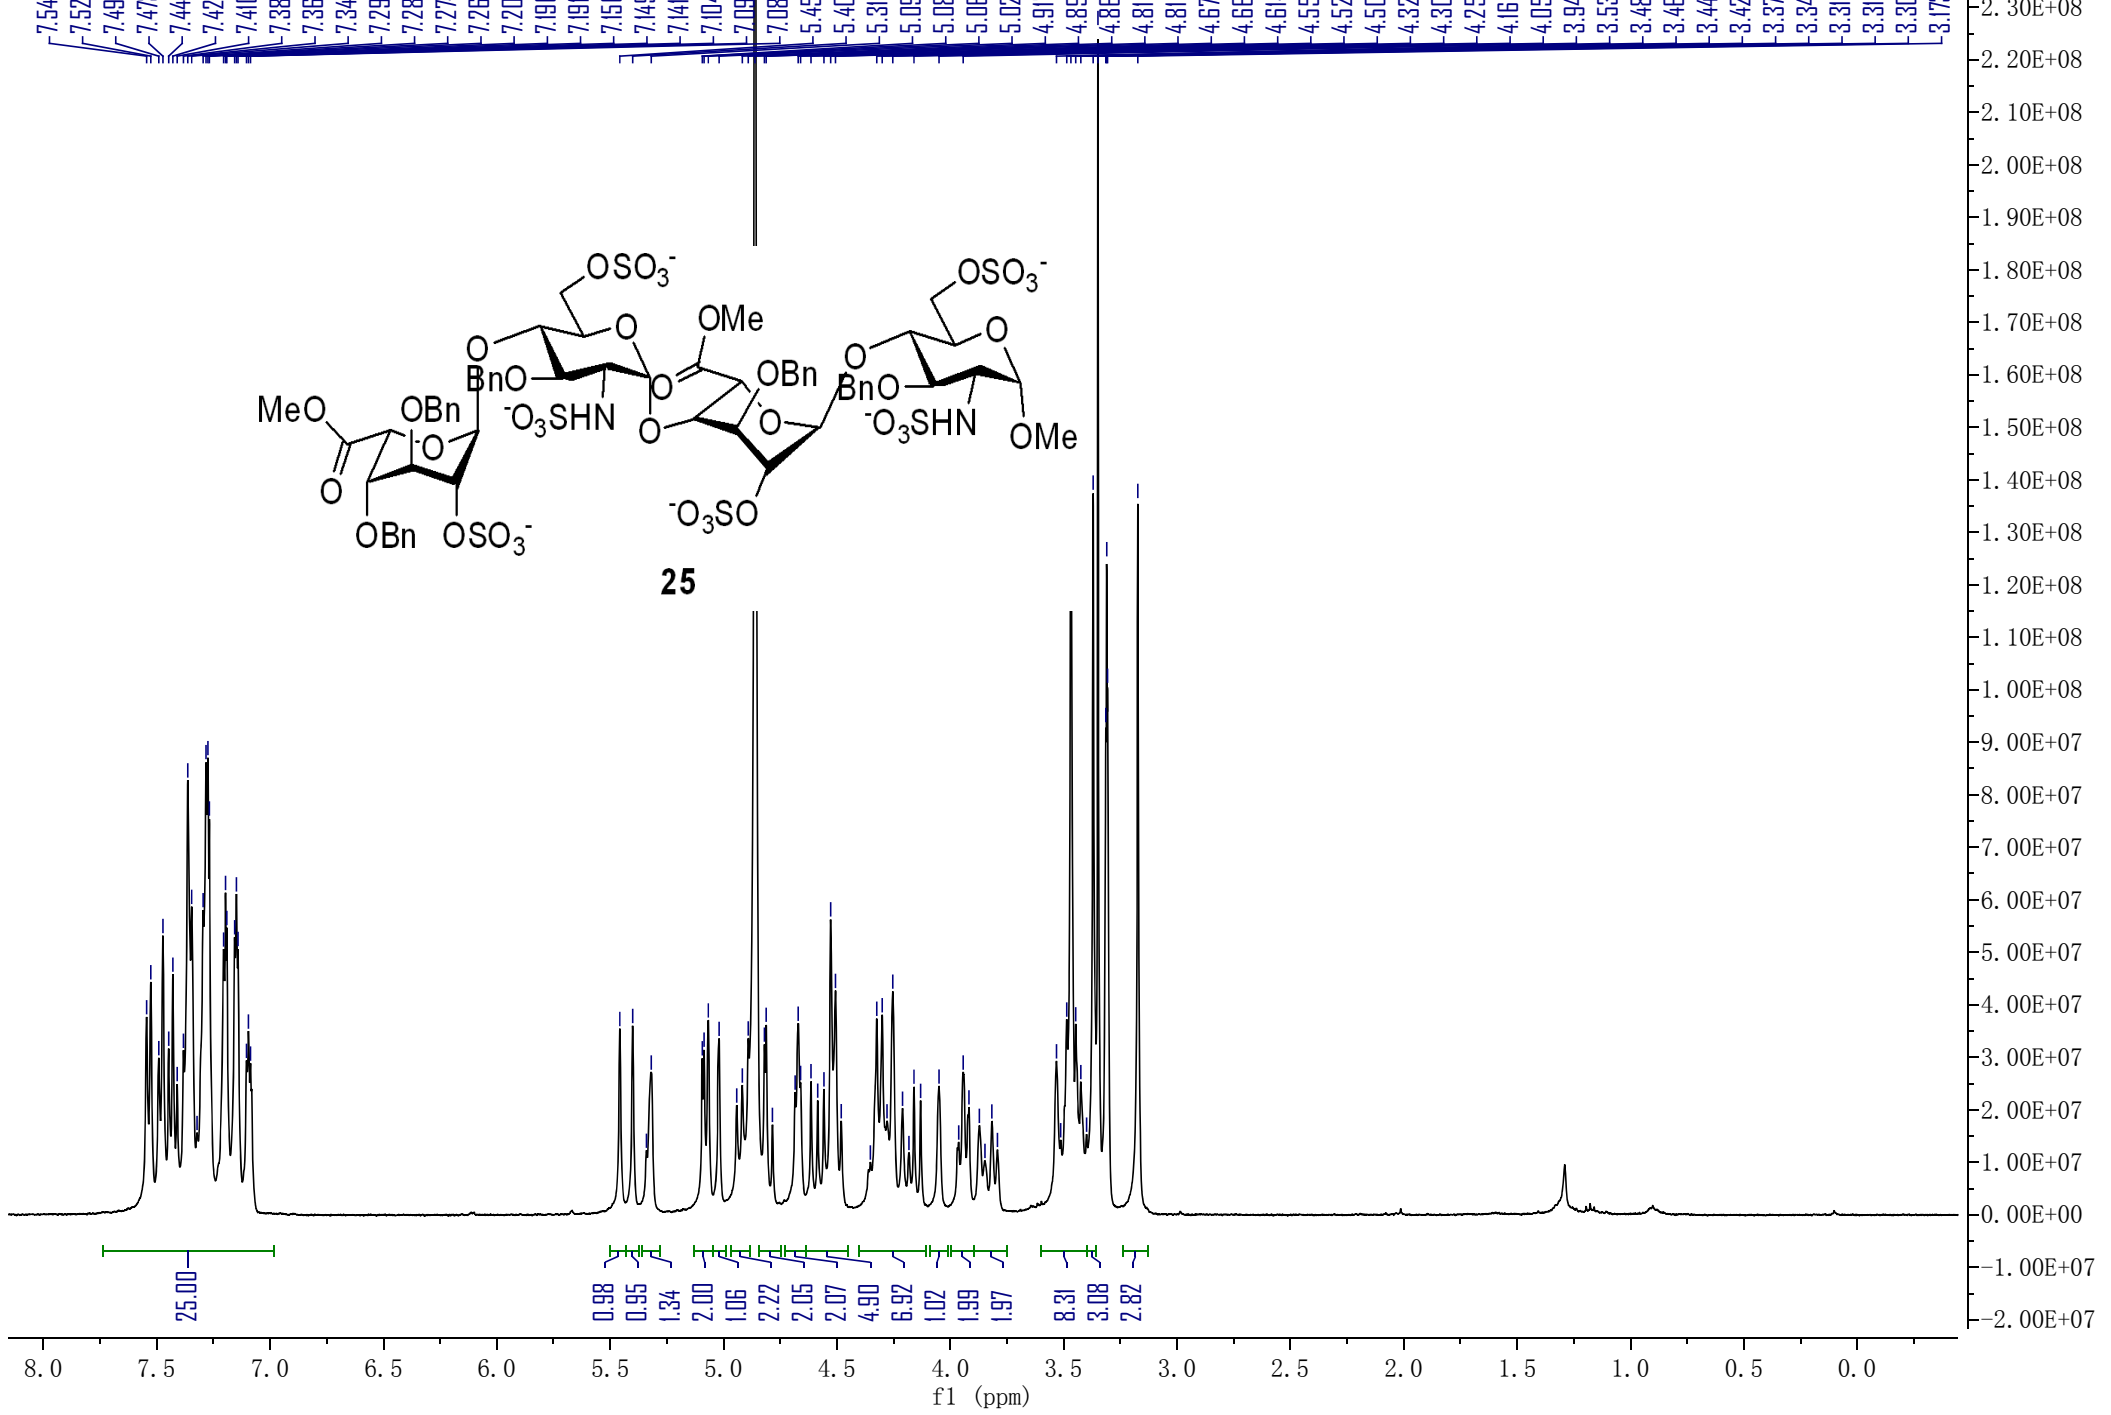

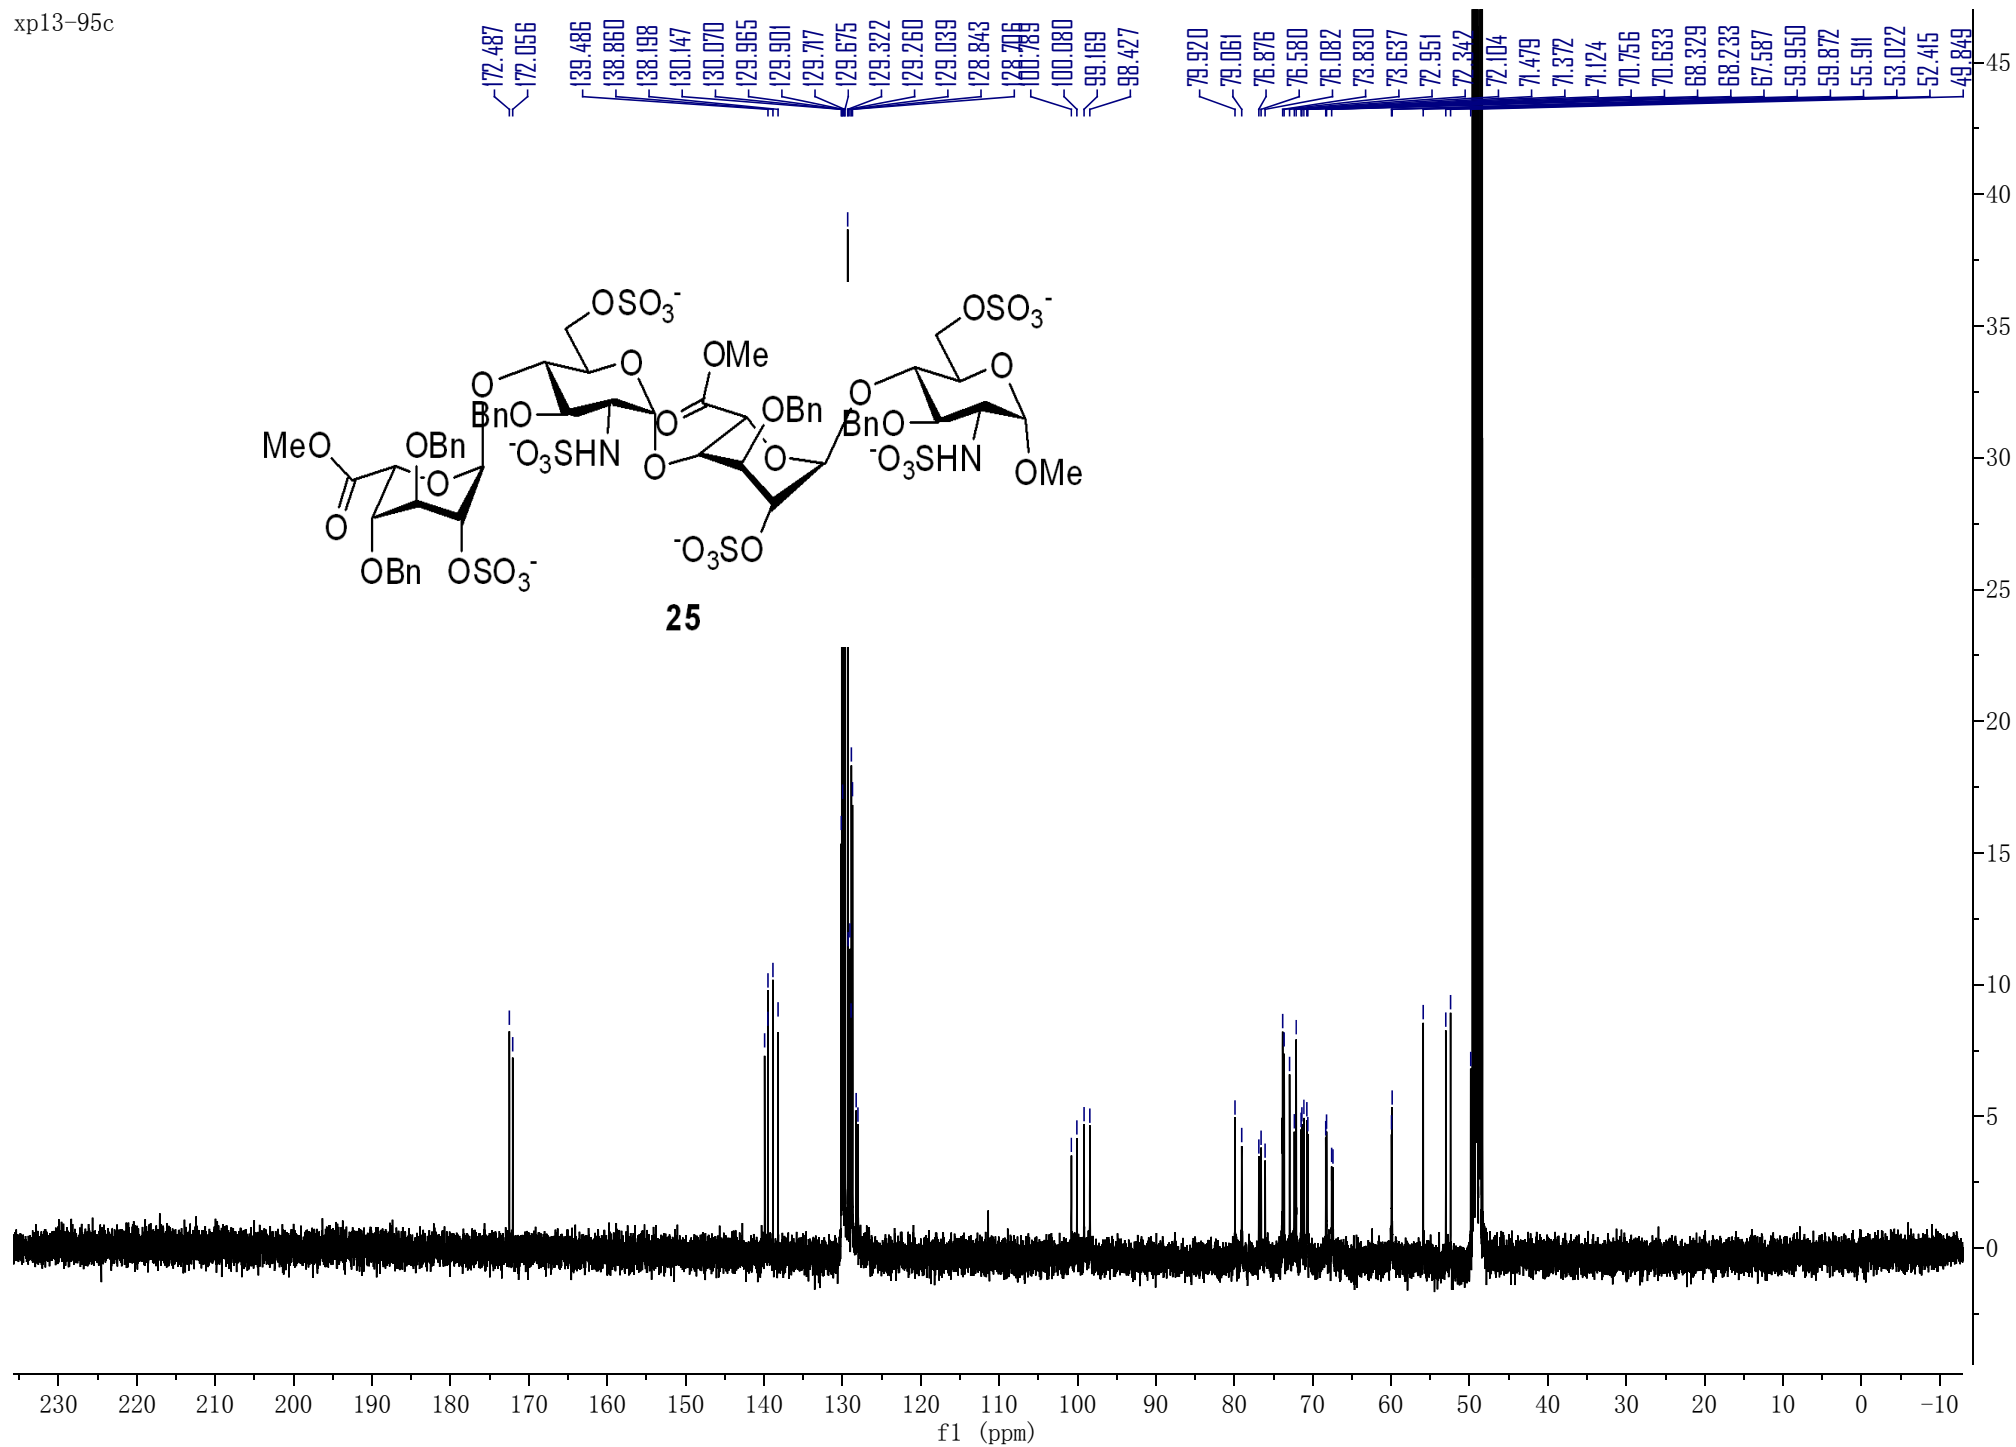



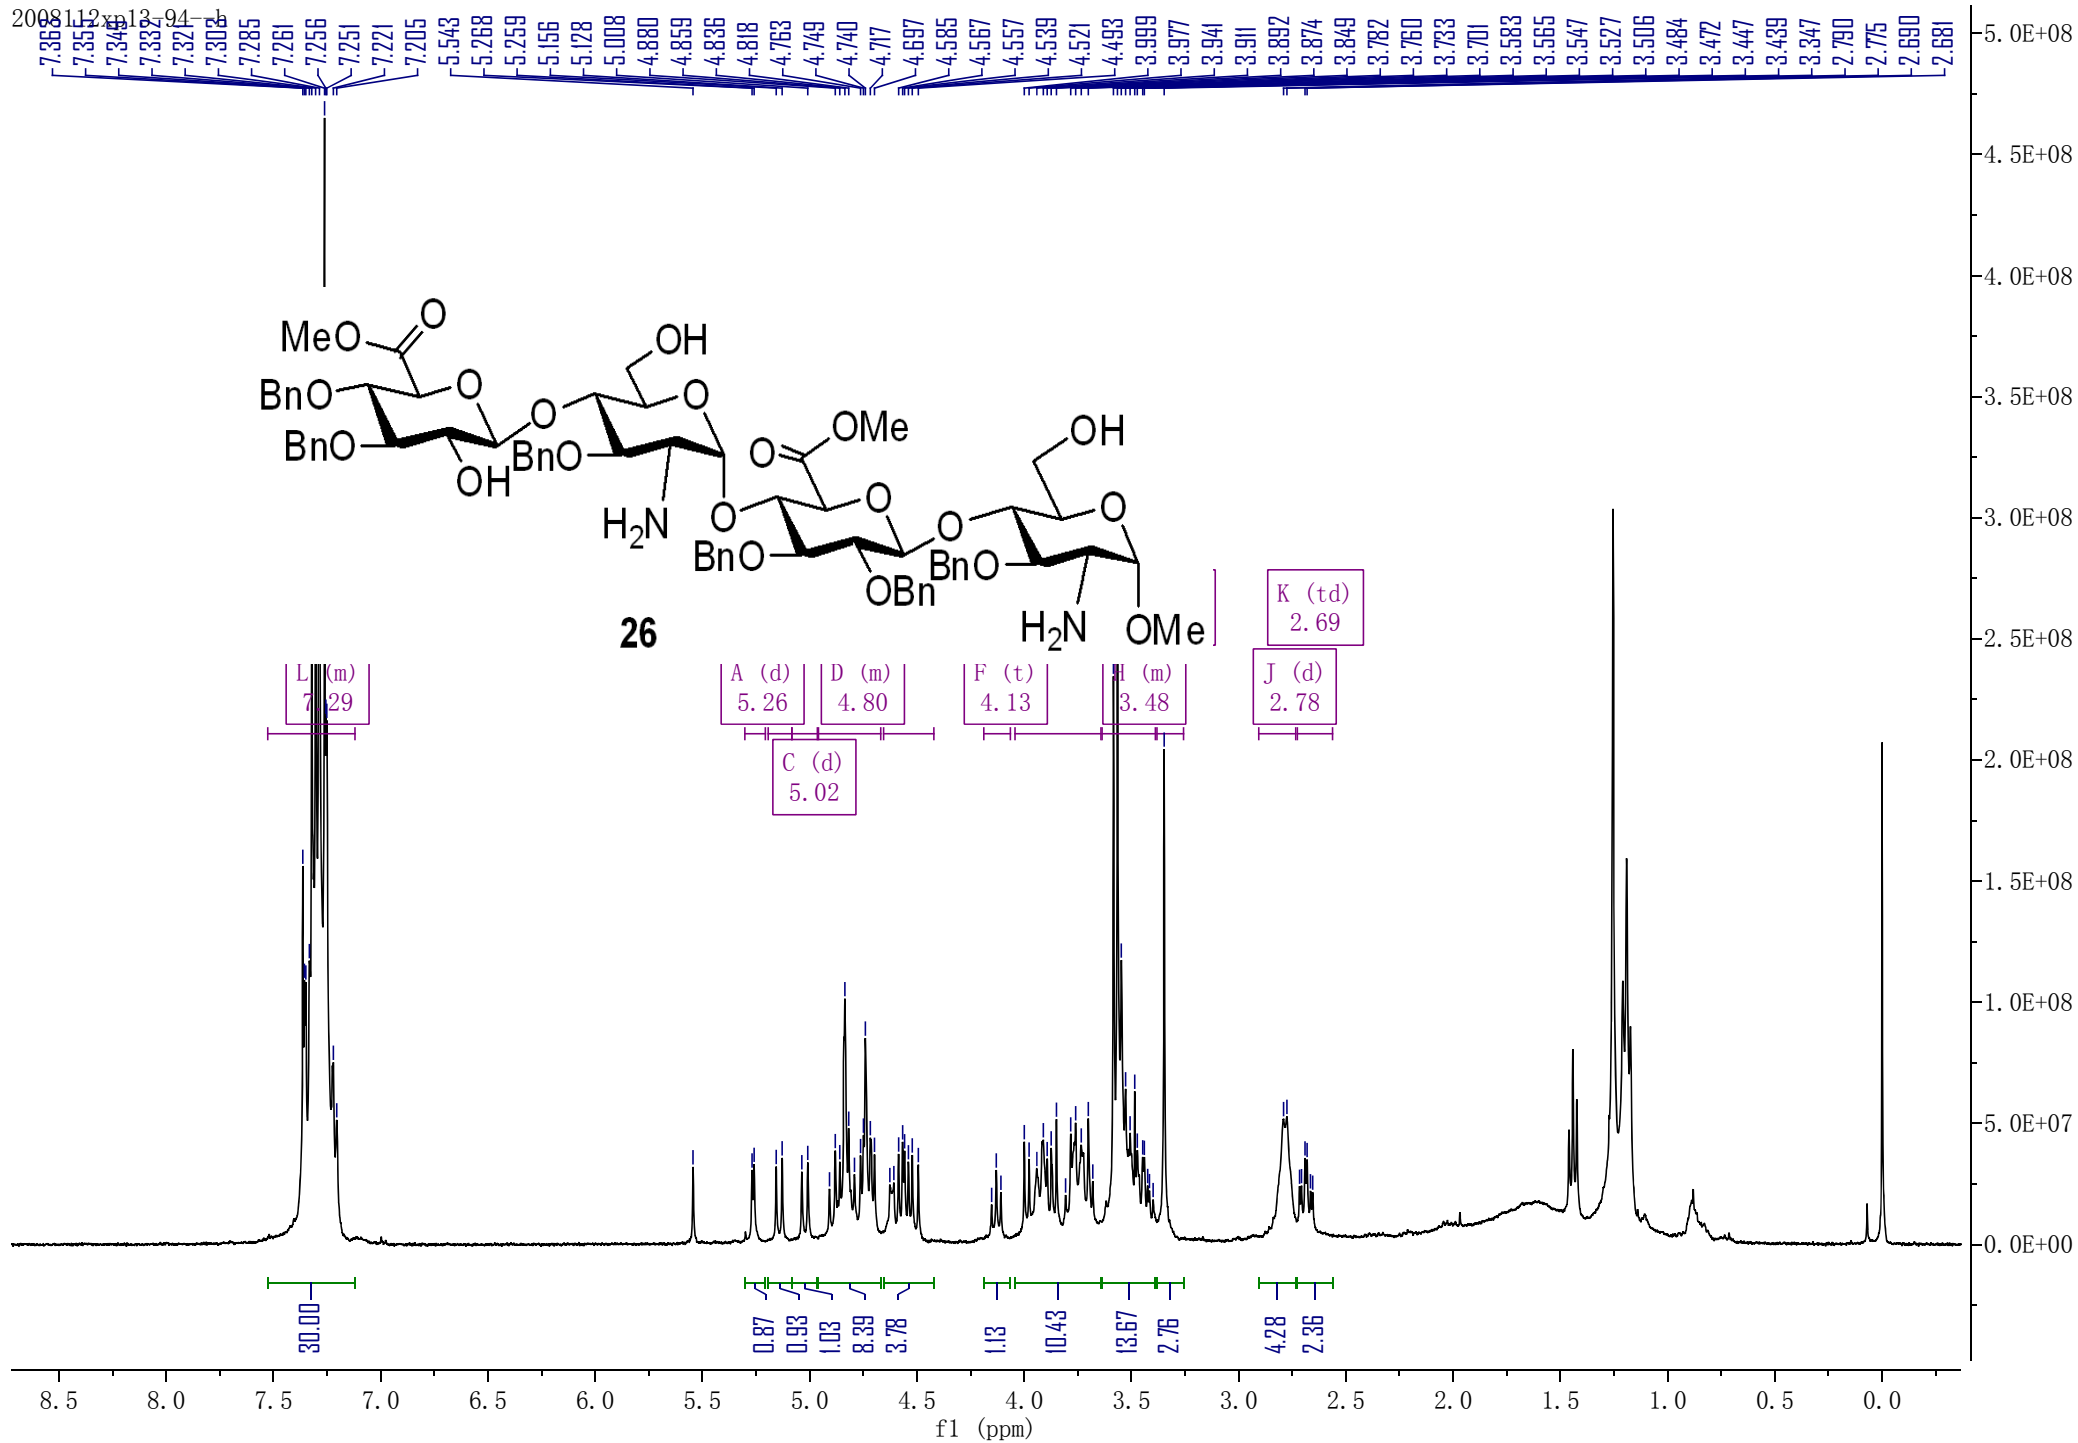

2008132XP12-99H

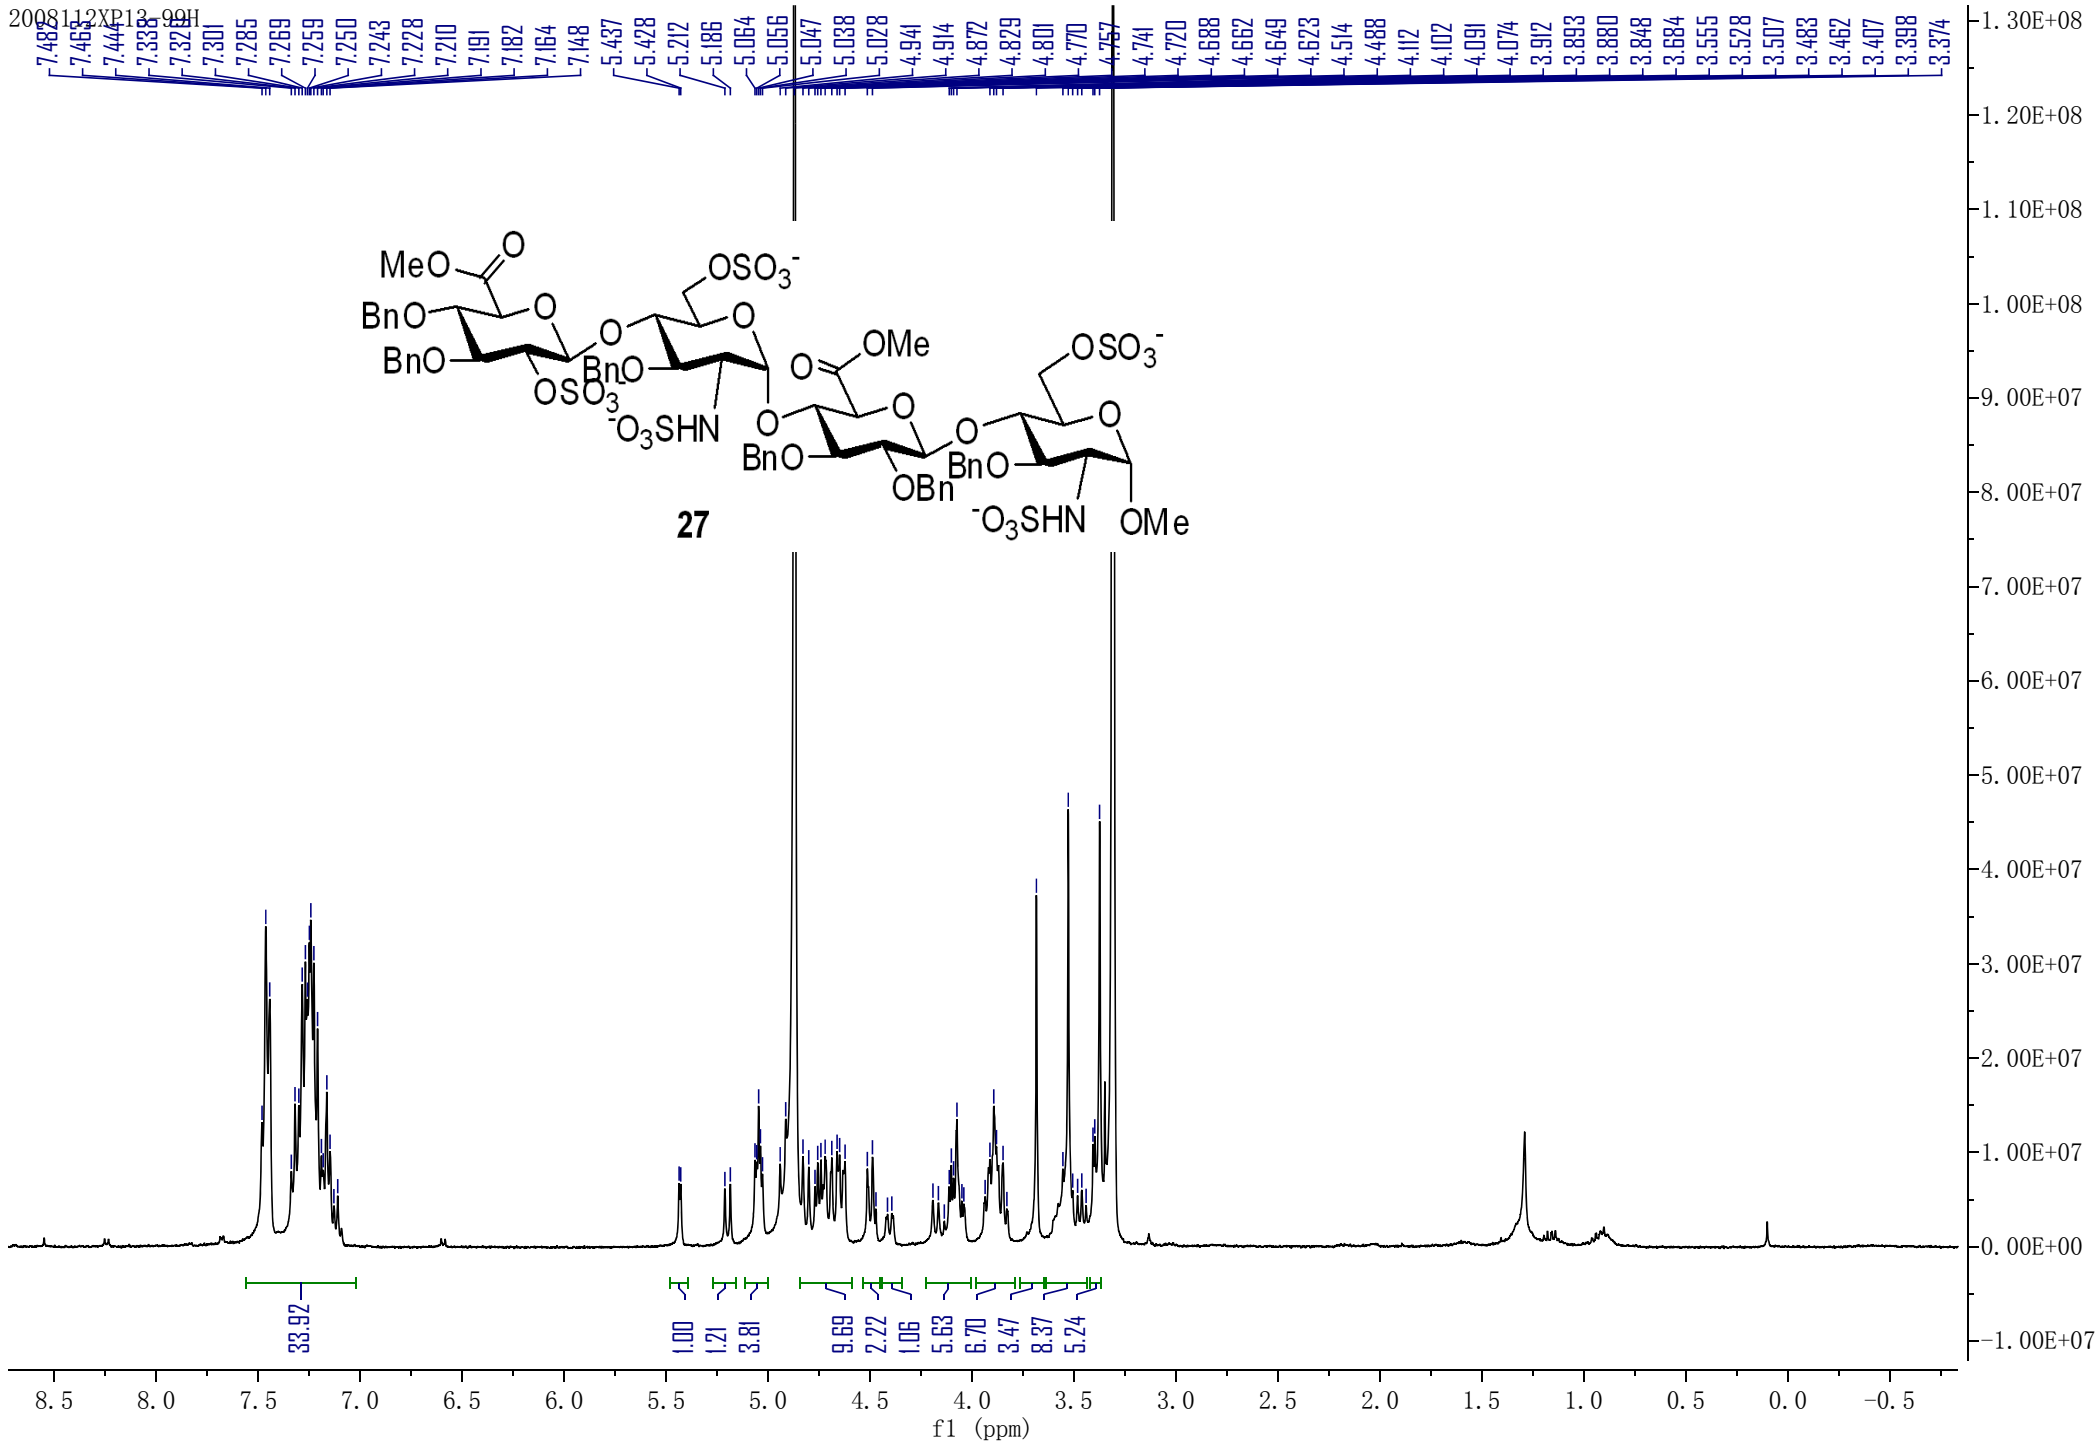

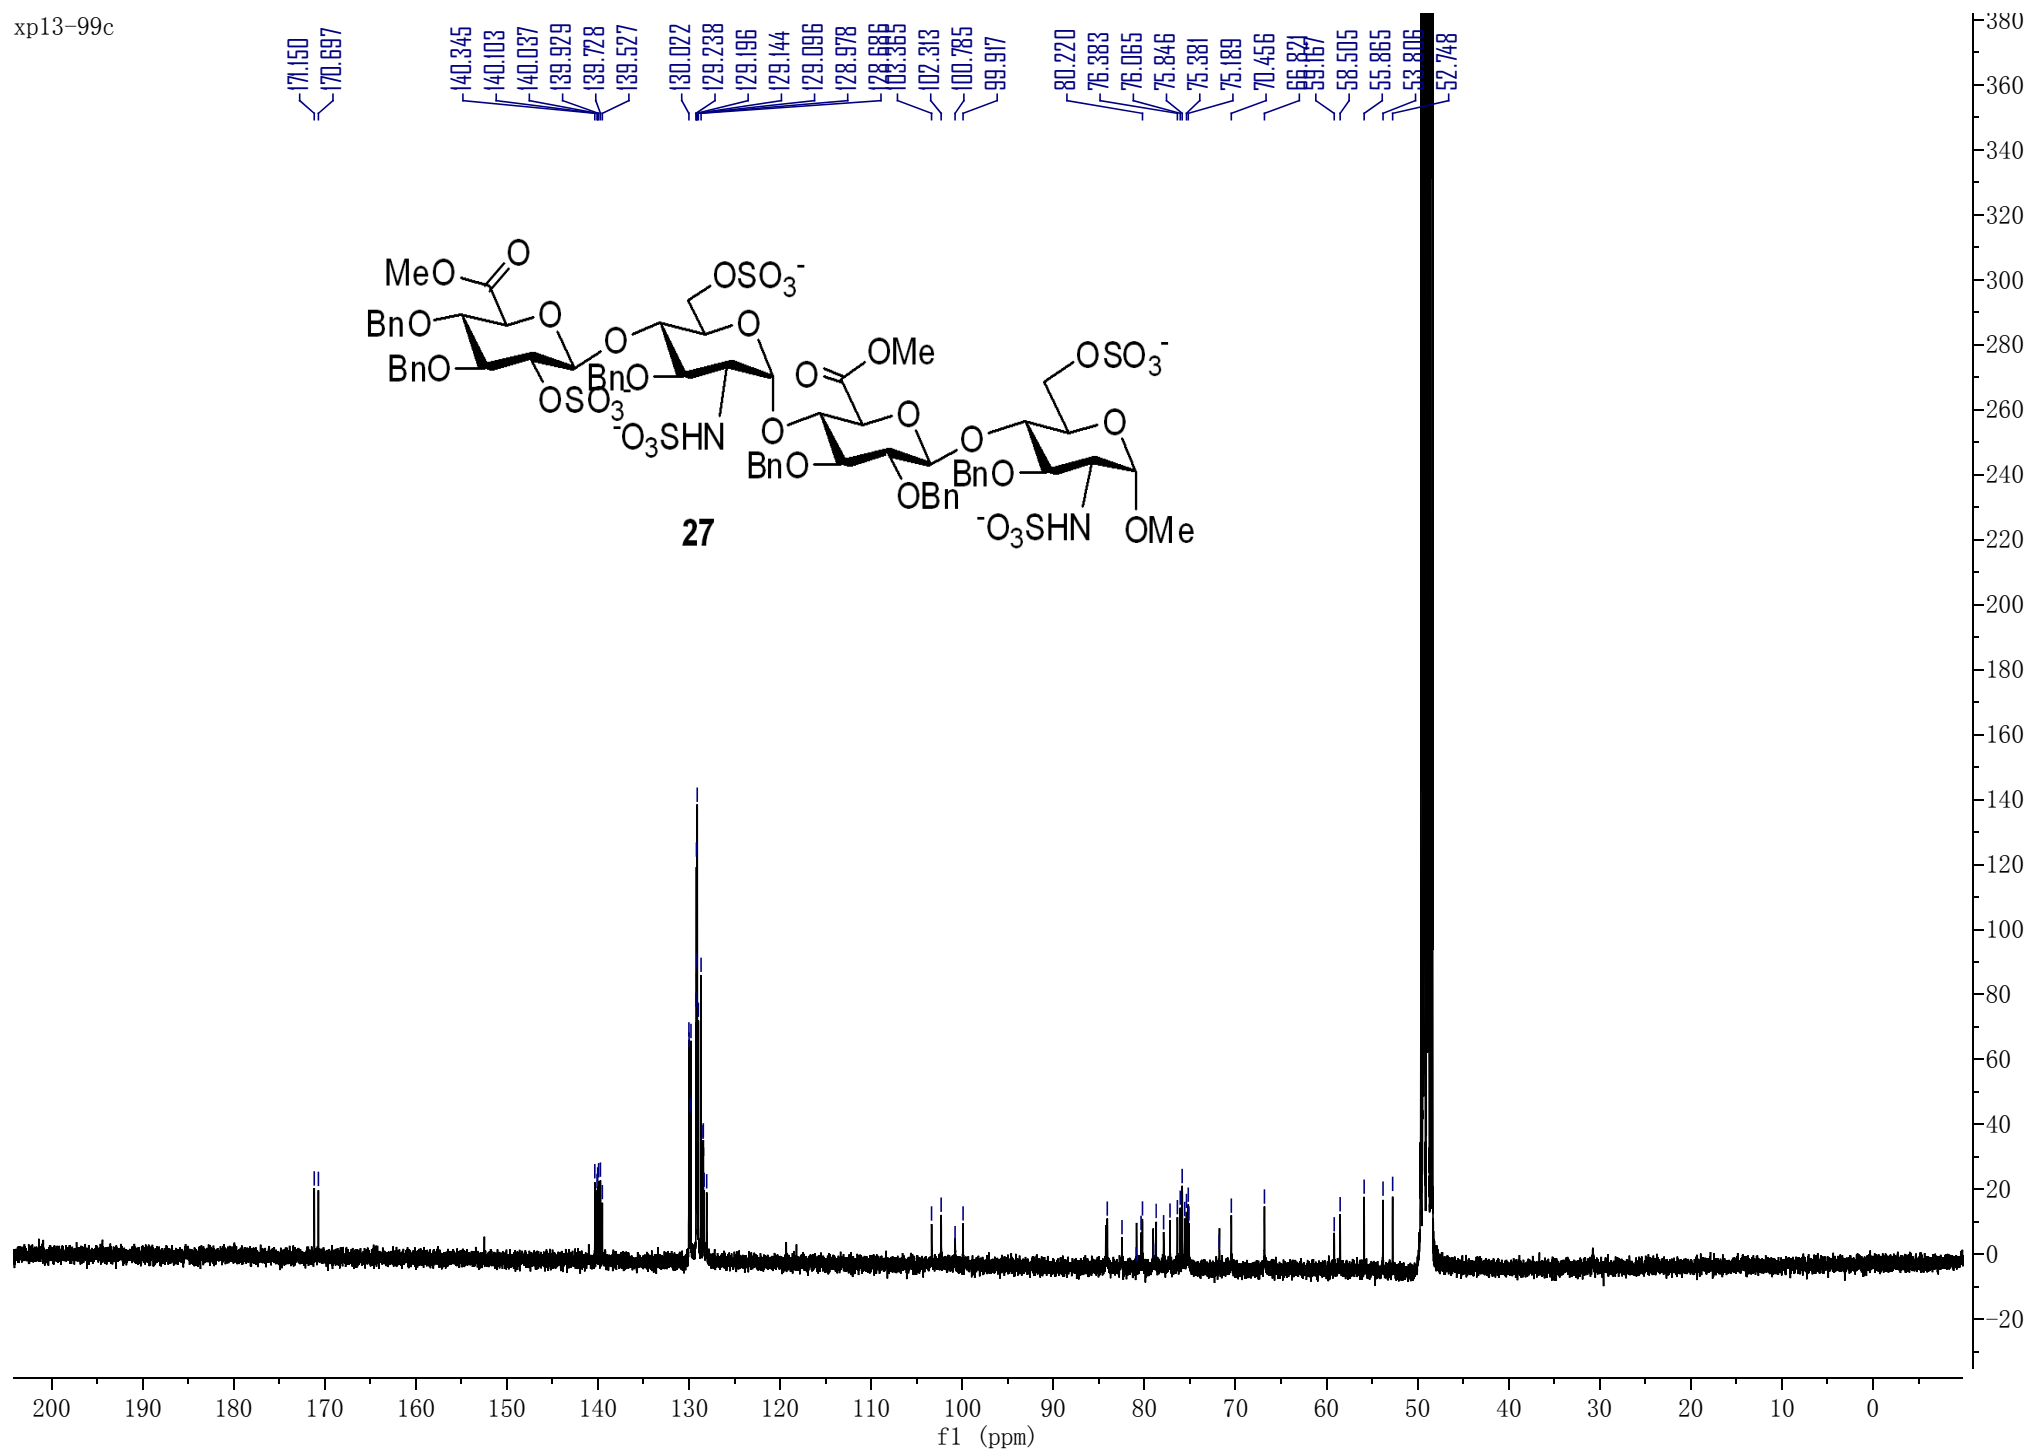

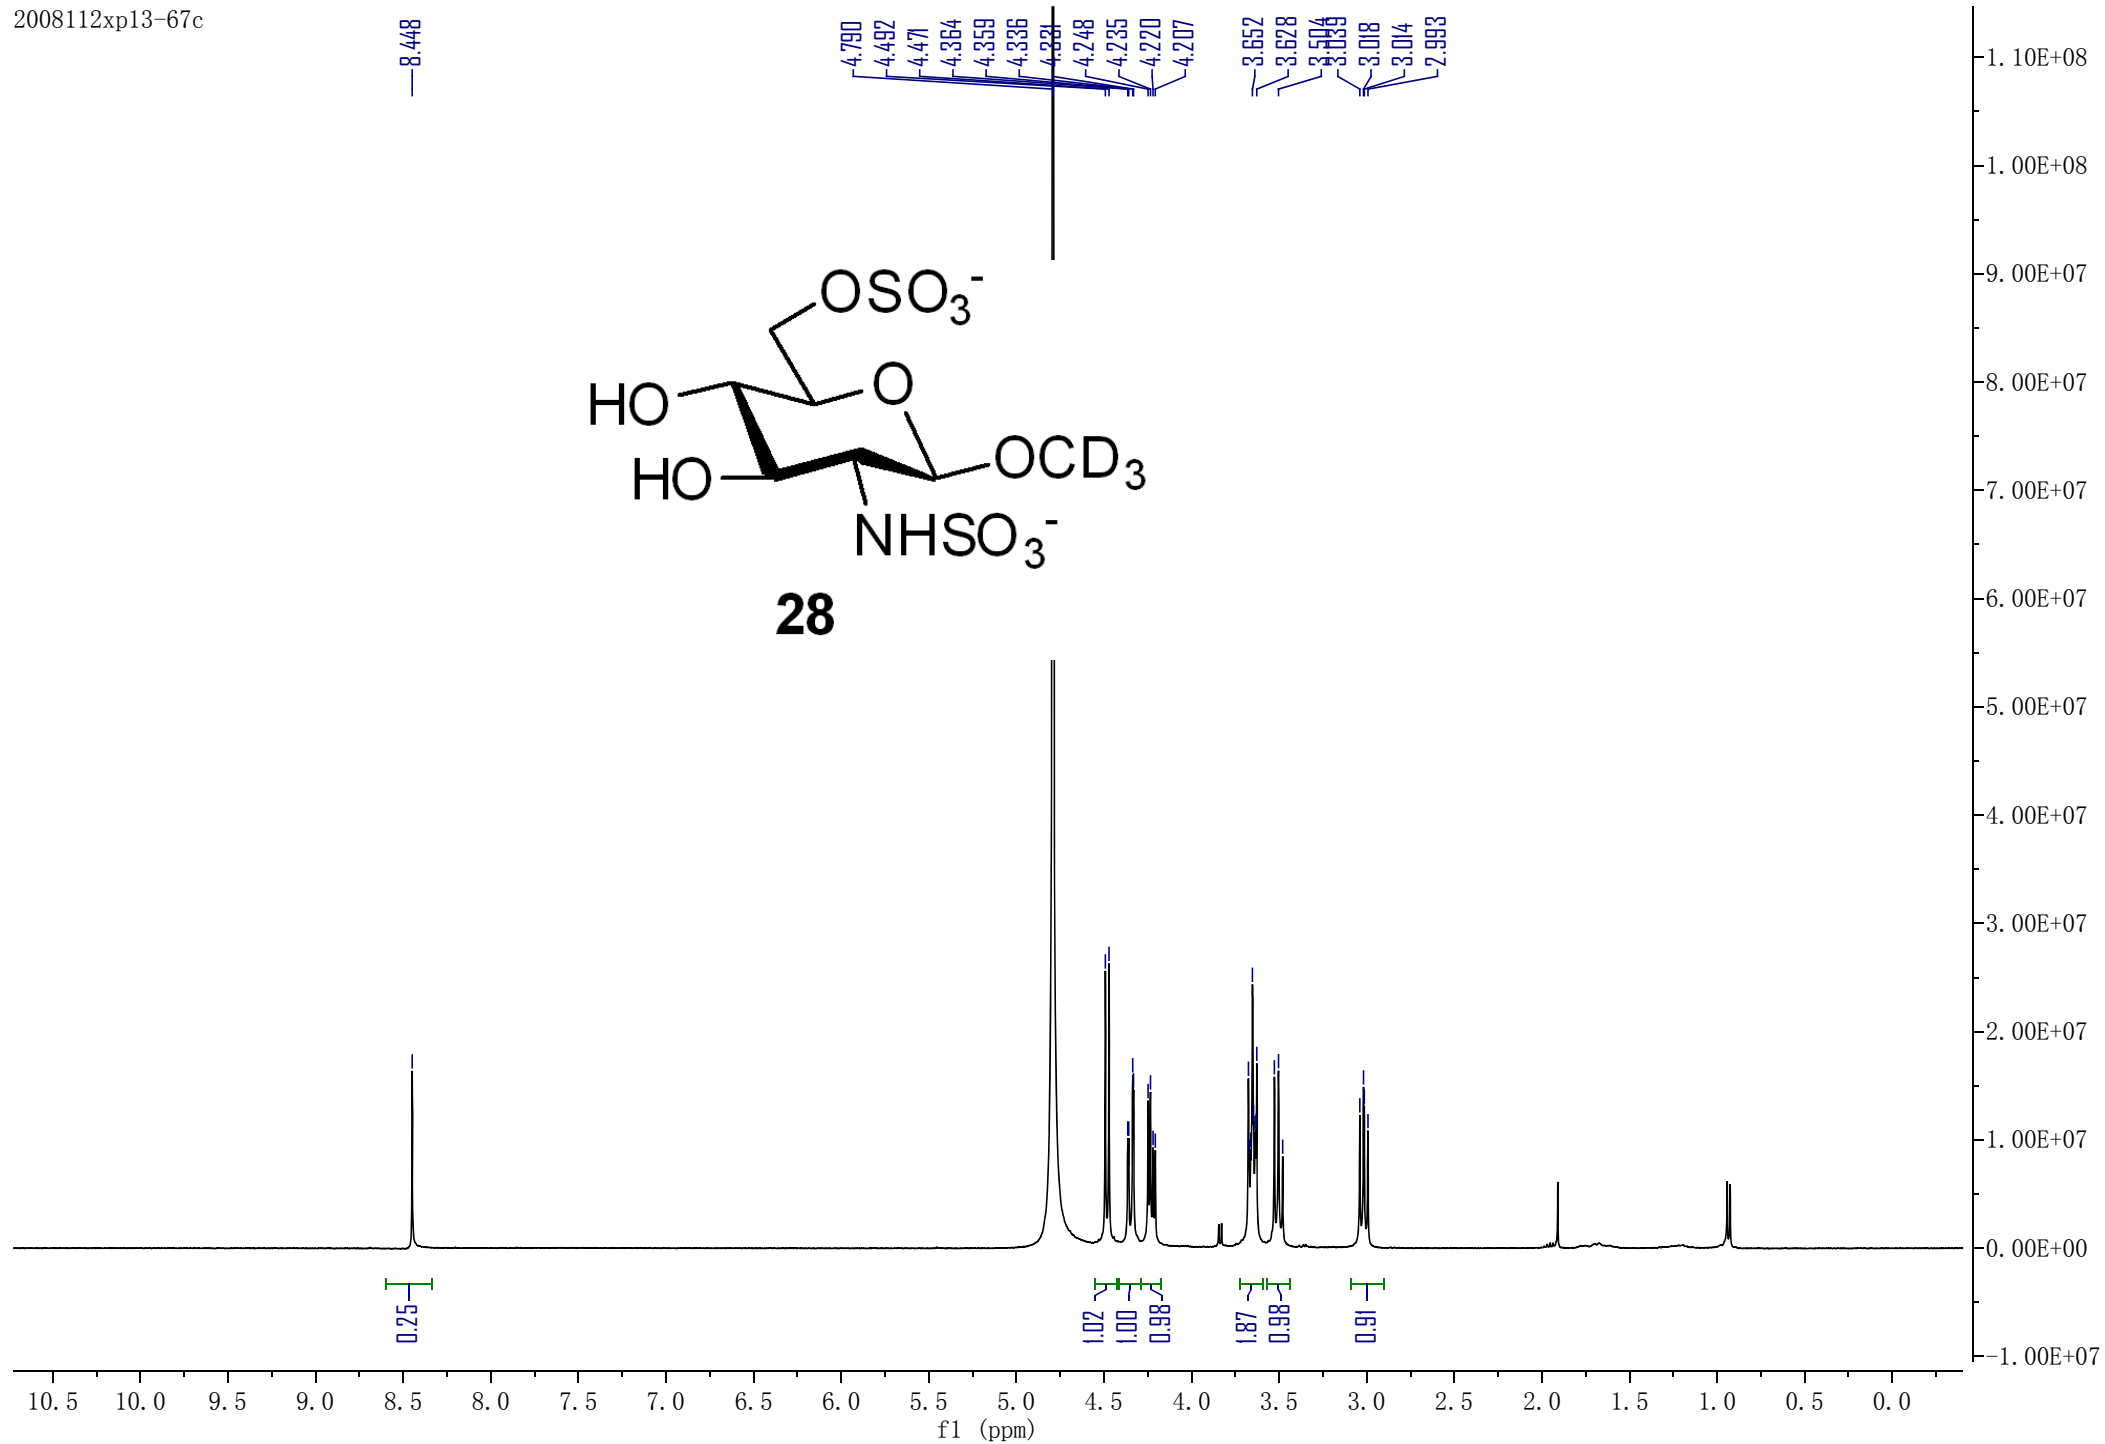

CARBON\_01  
2008112xp13-67c

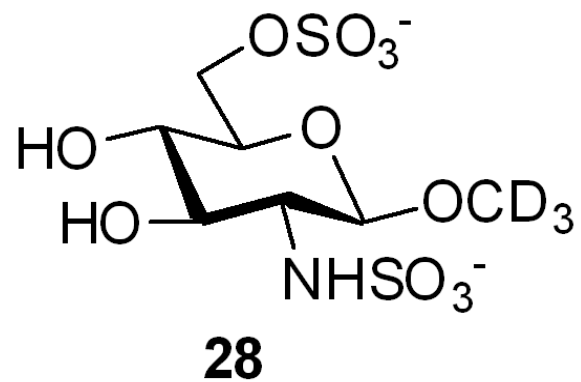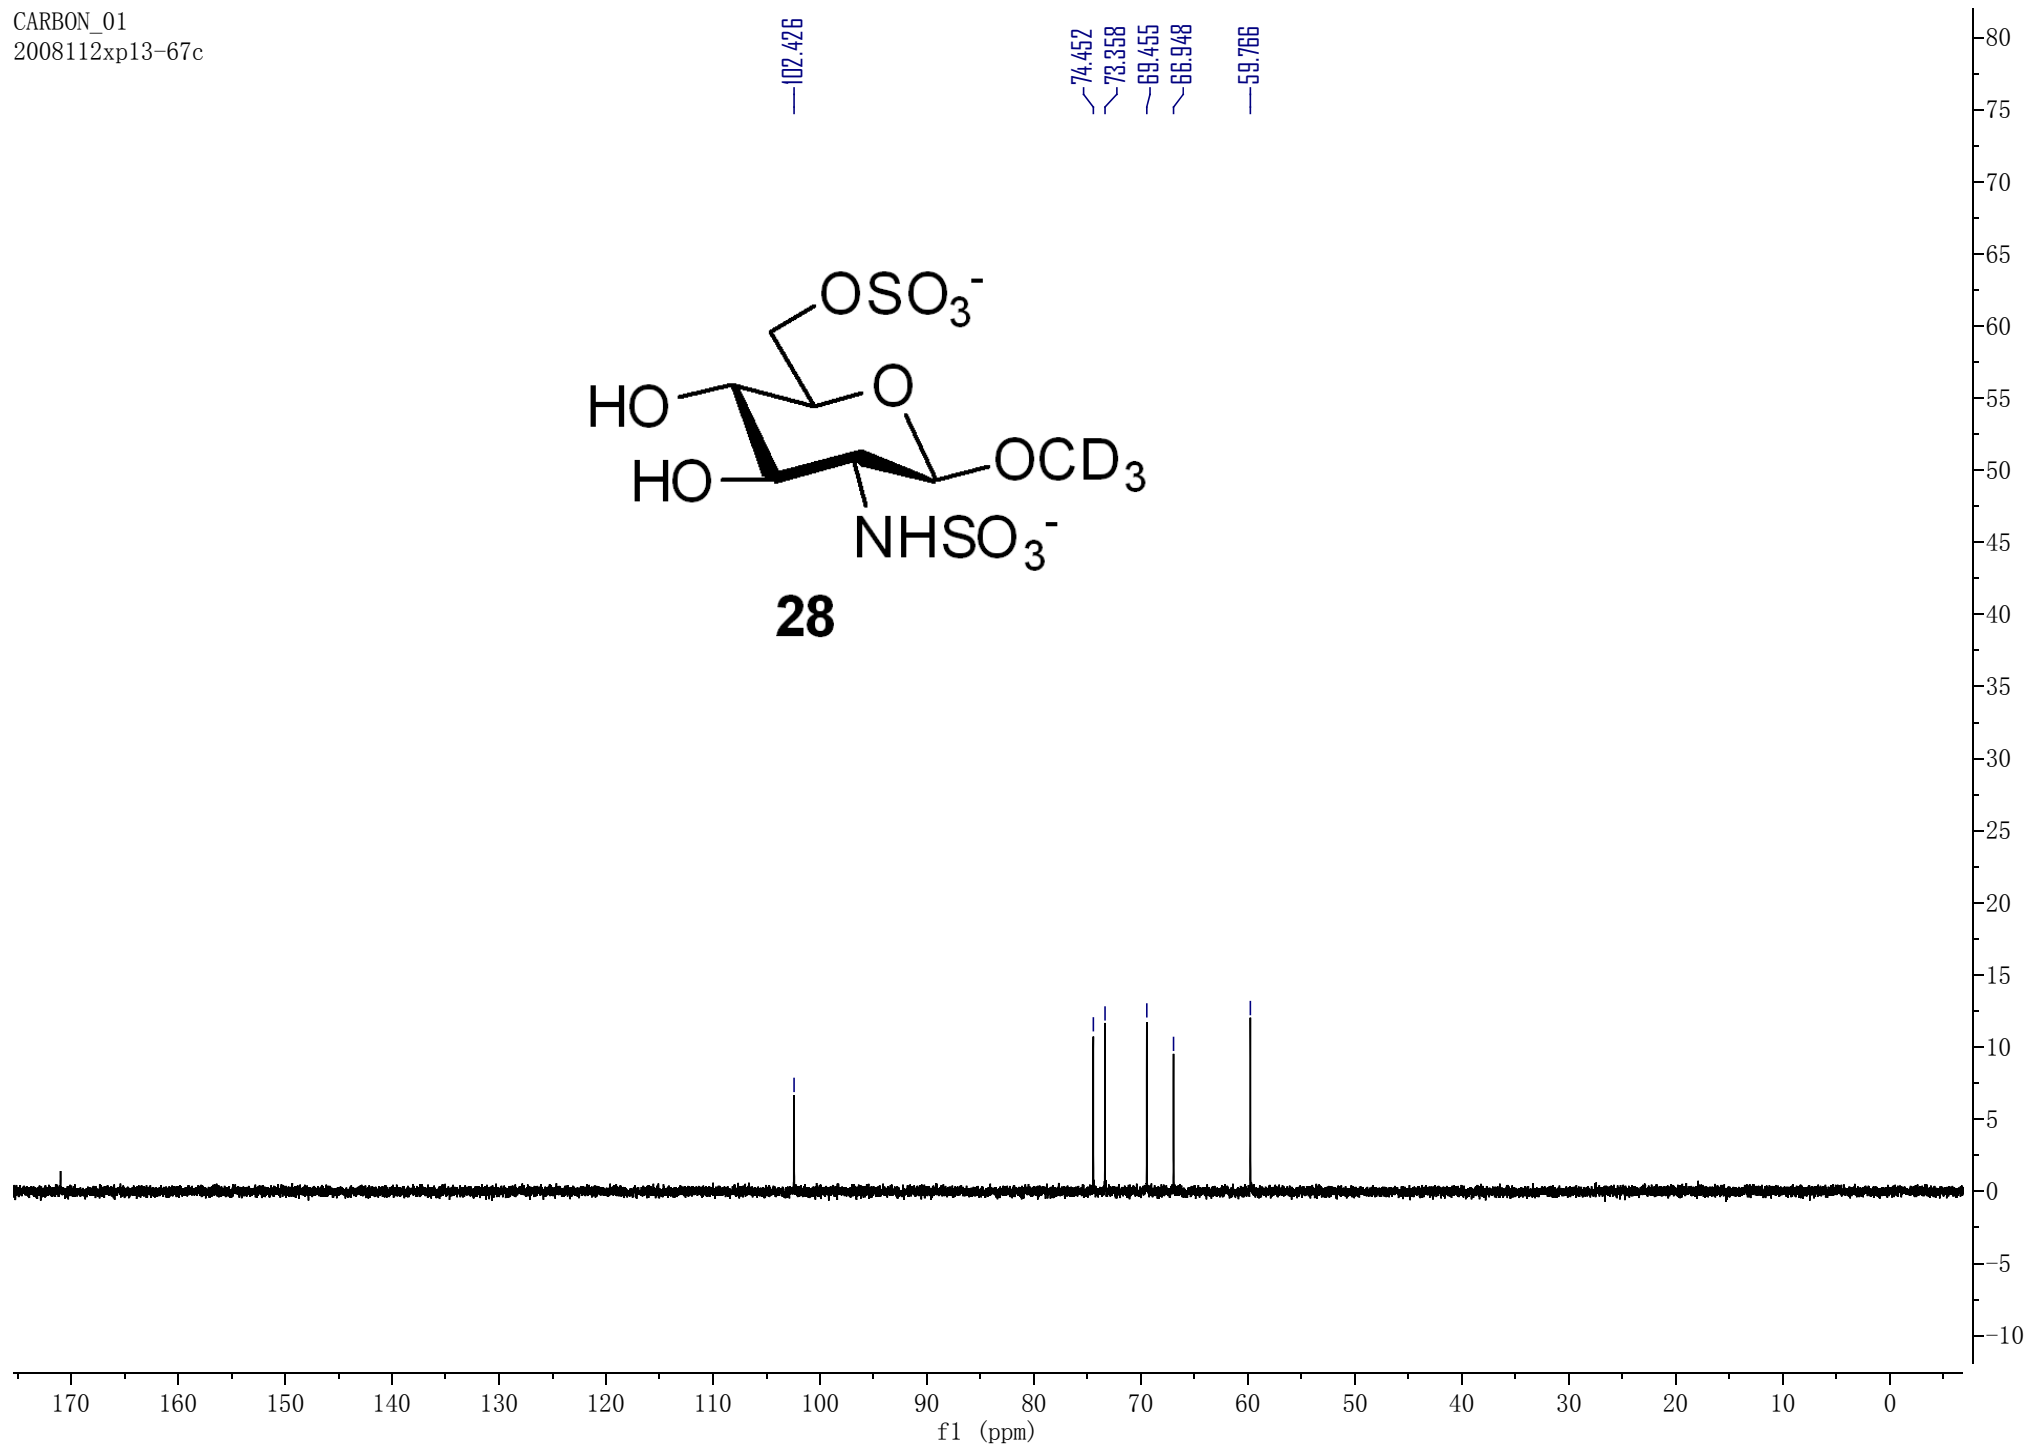

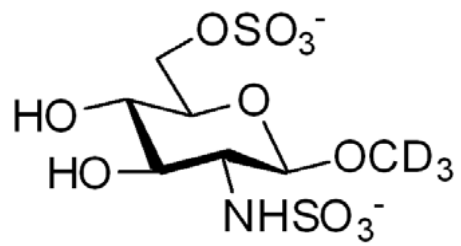

28

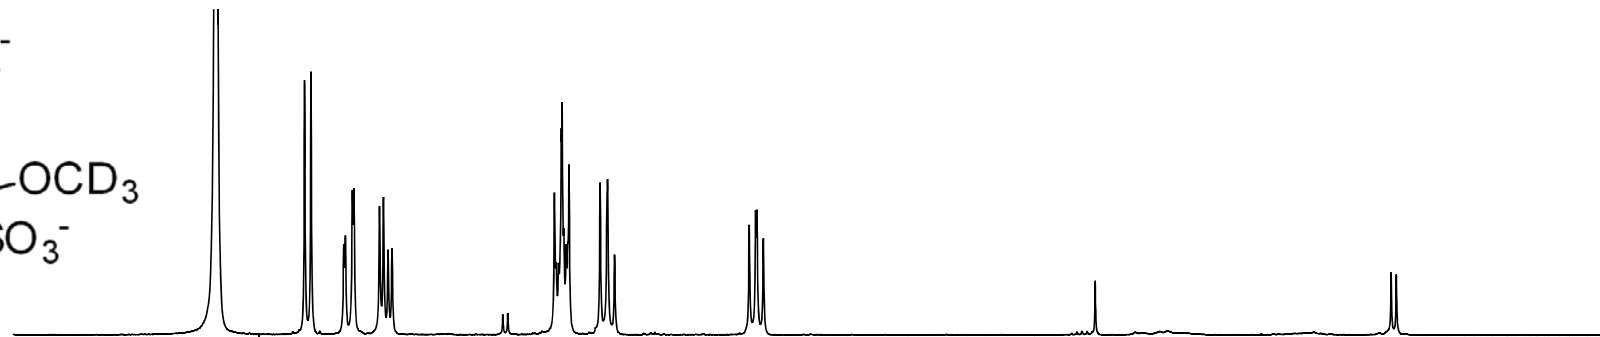

gCOSY\_01  
2008112xp13-67c

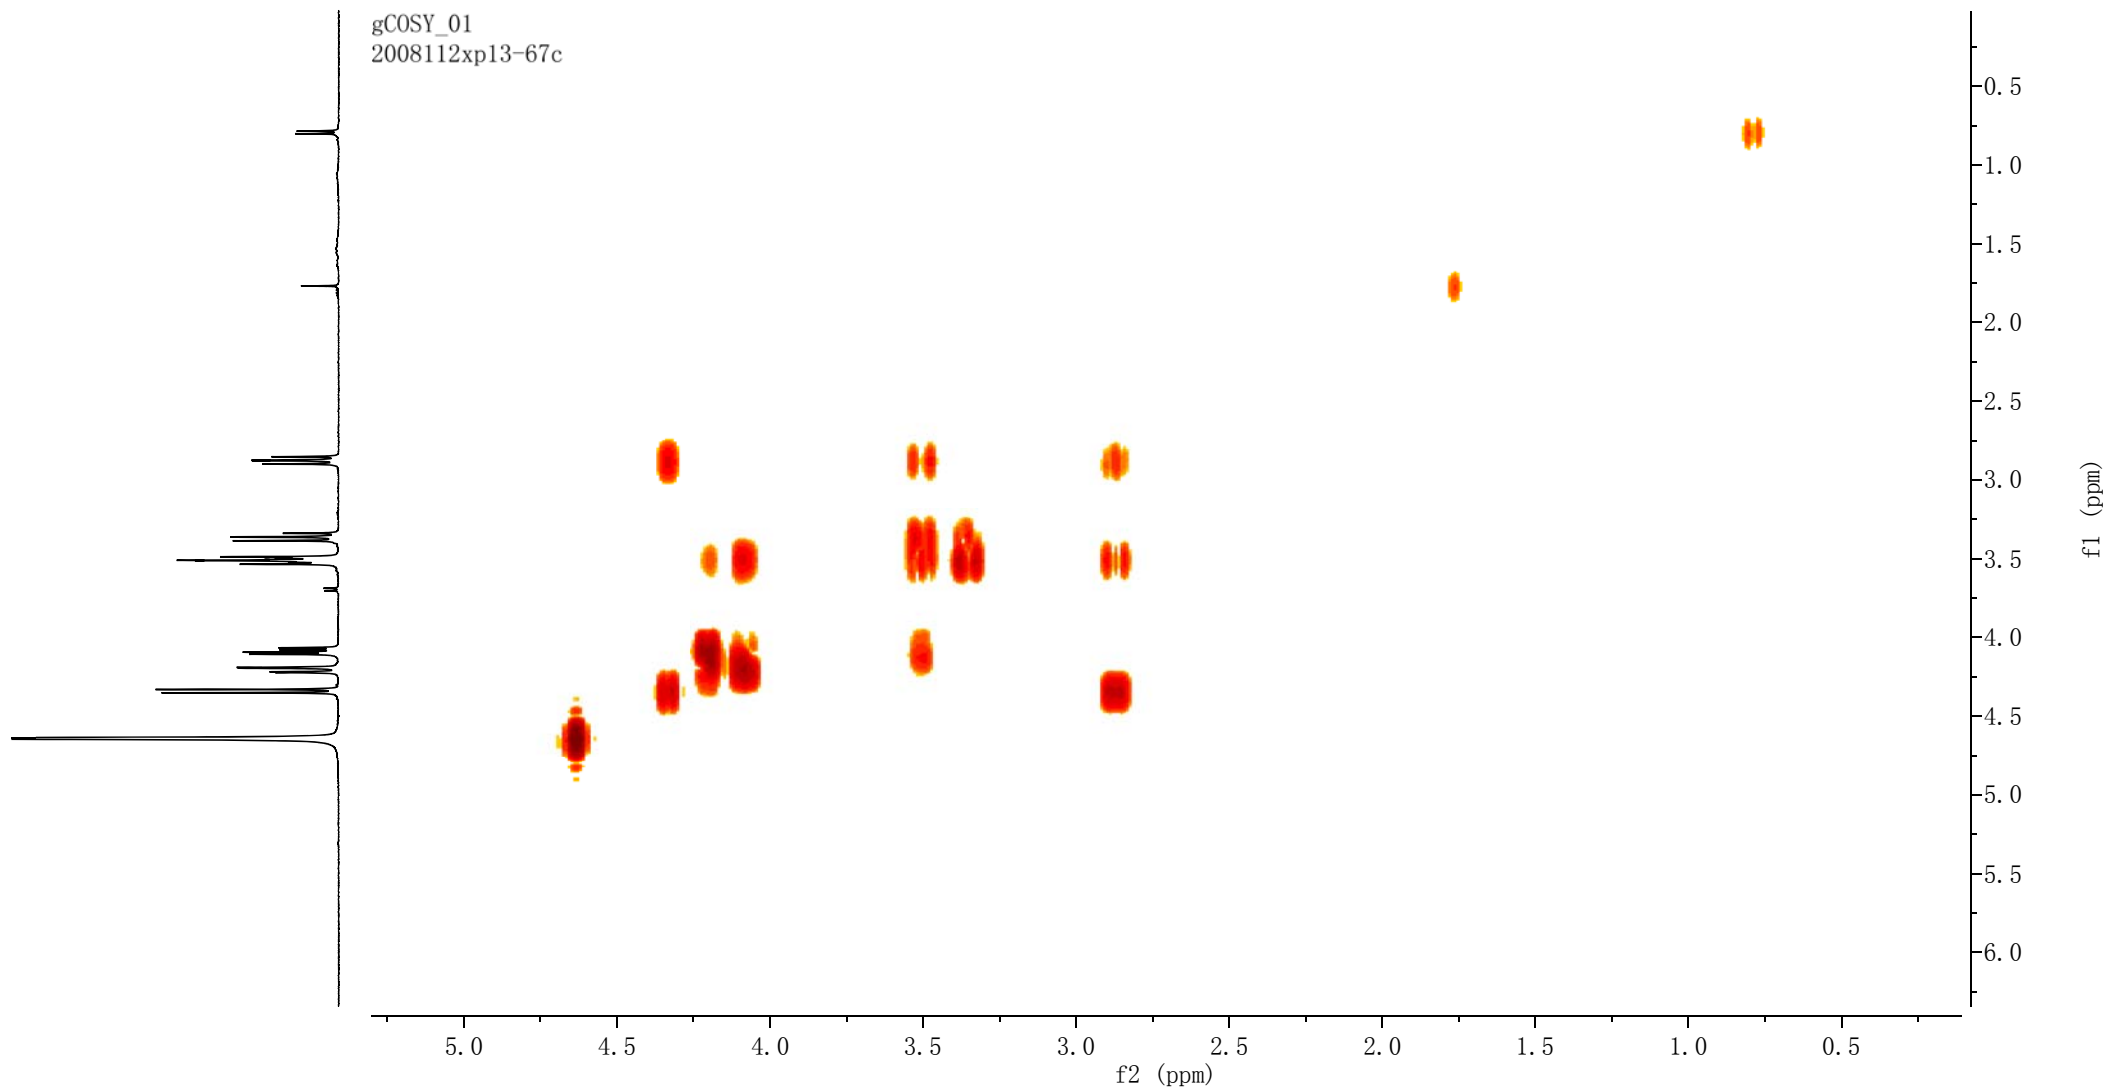

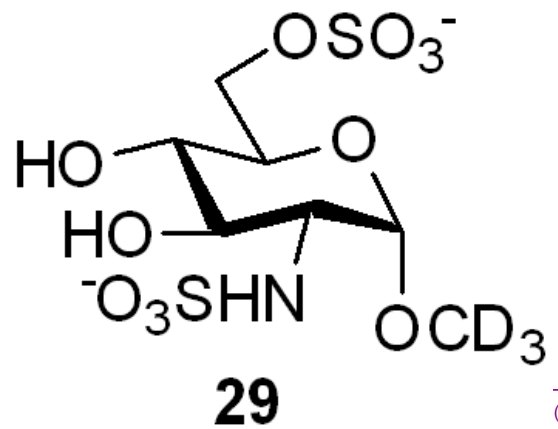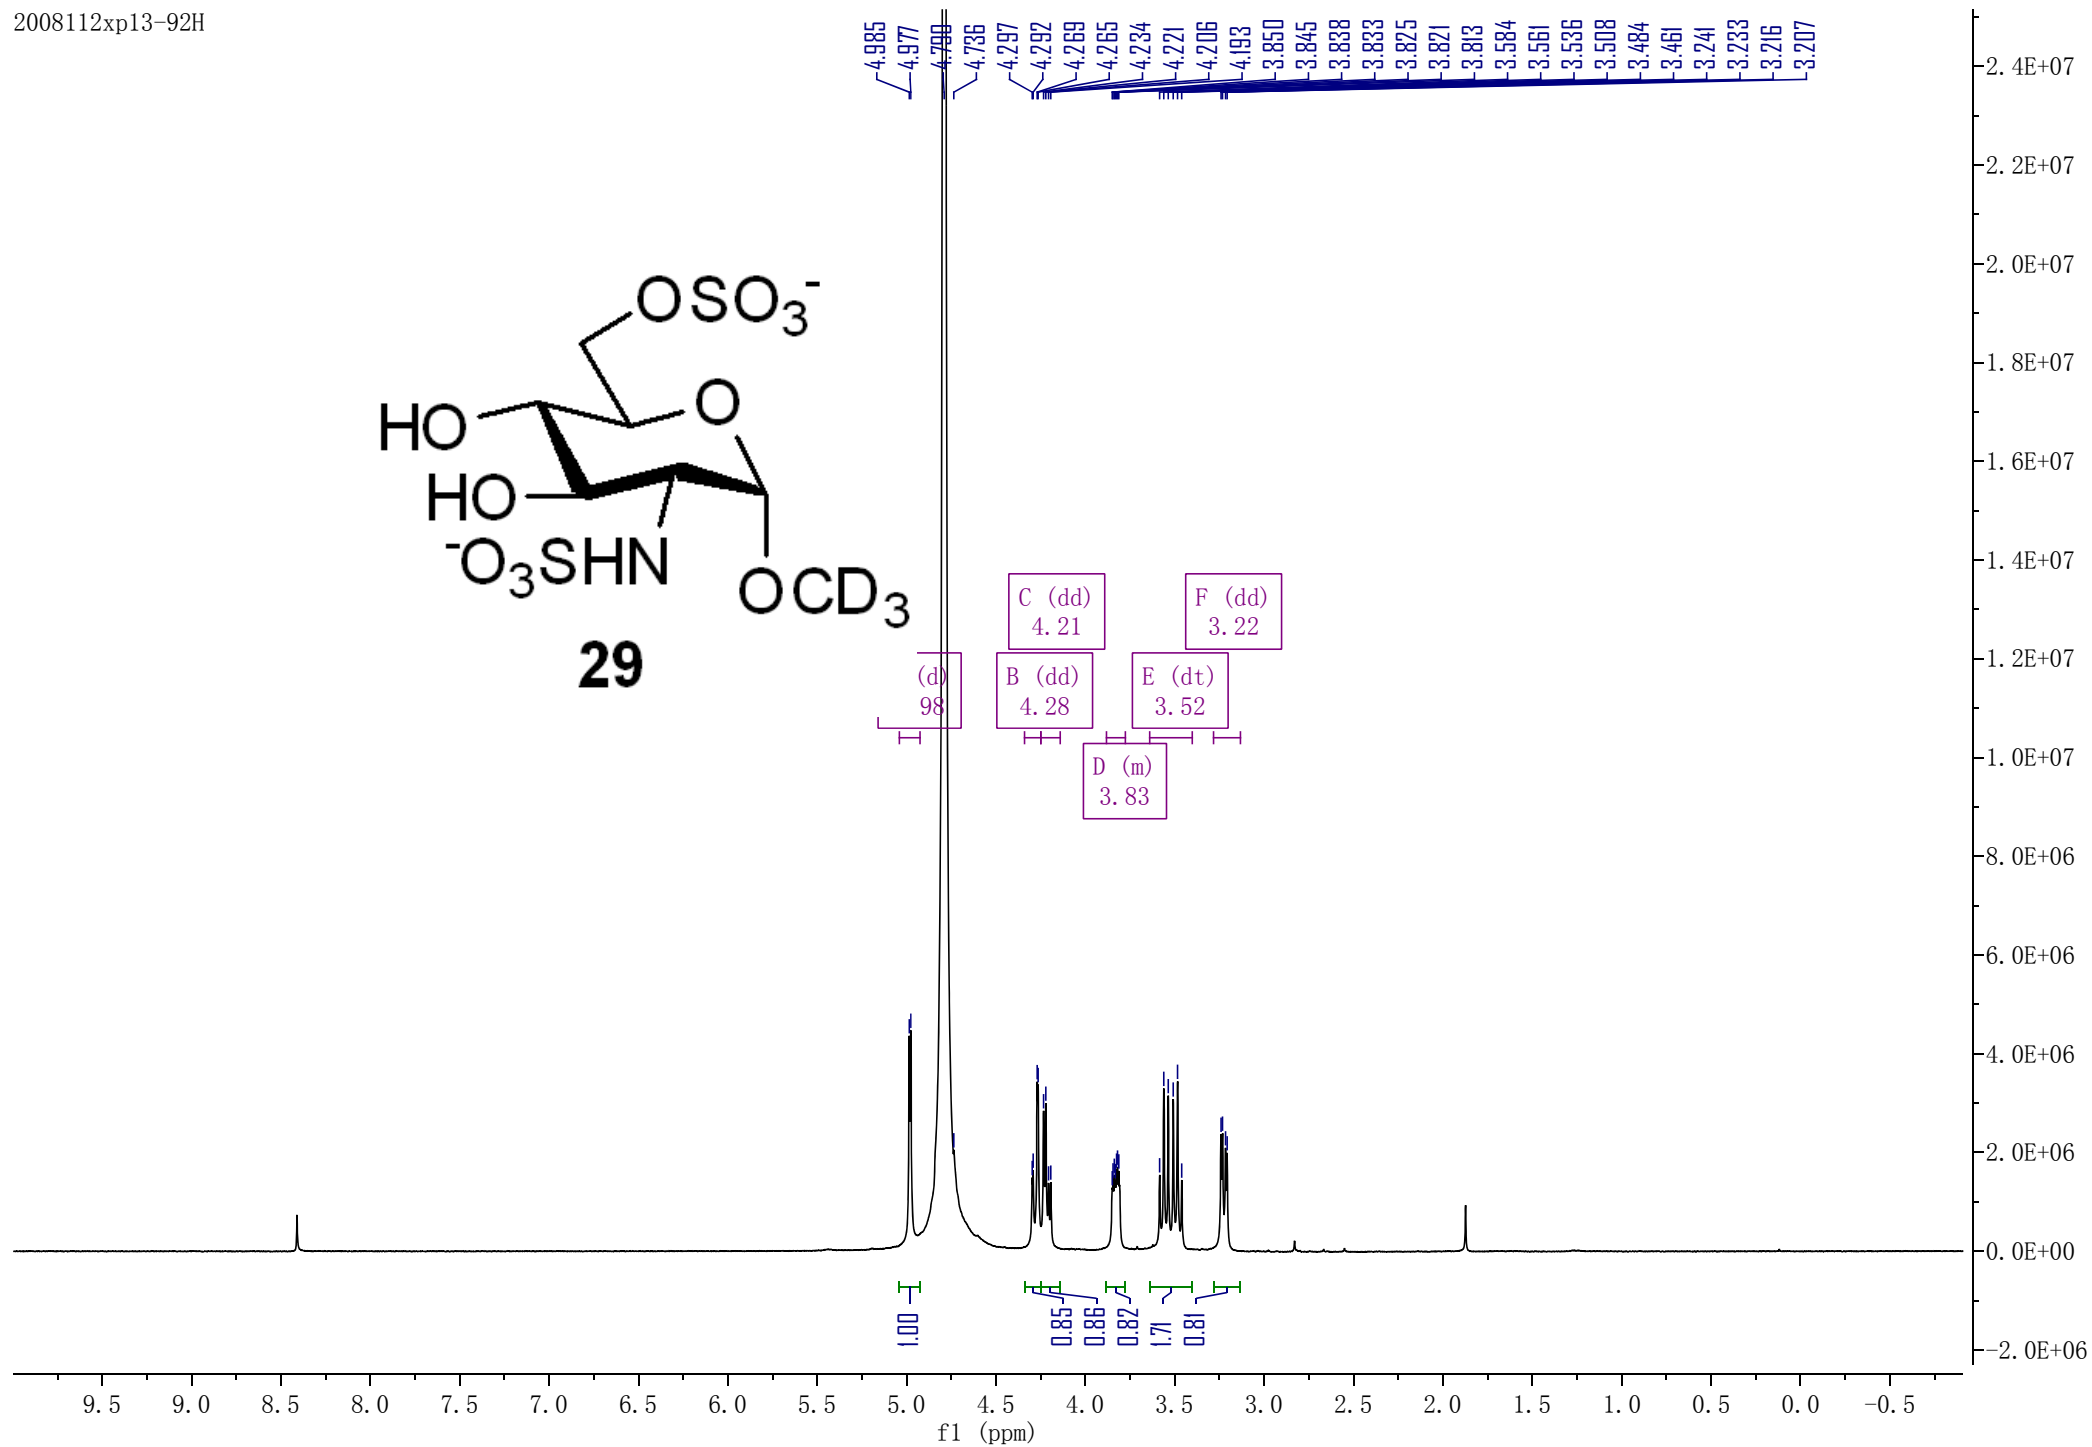

CARBON\_01  
2008112xp13-92

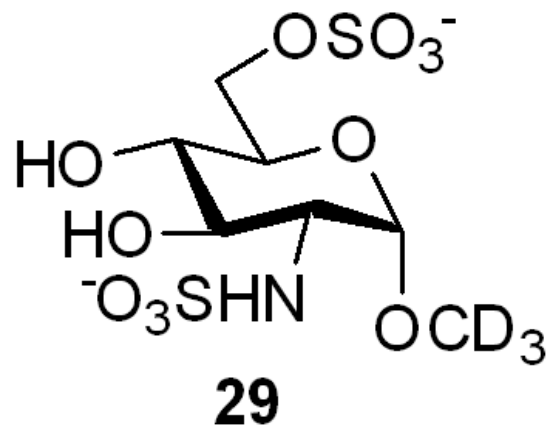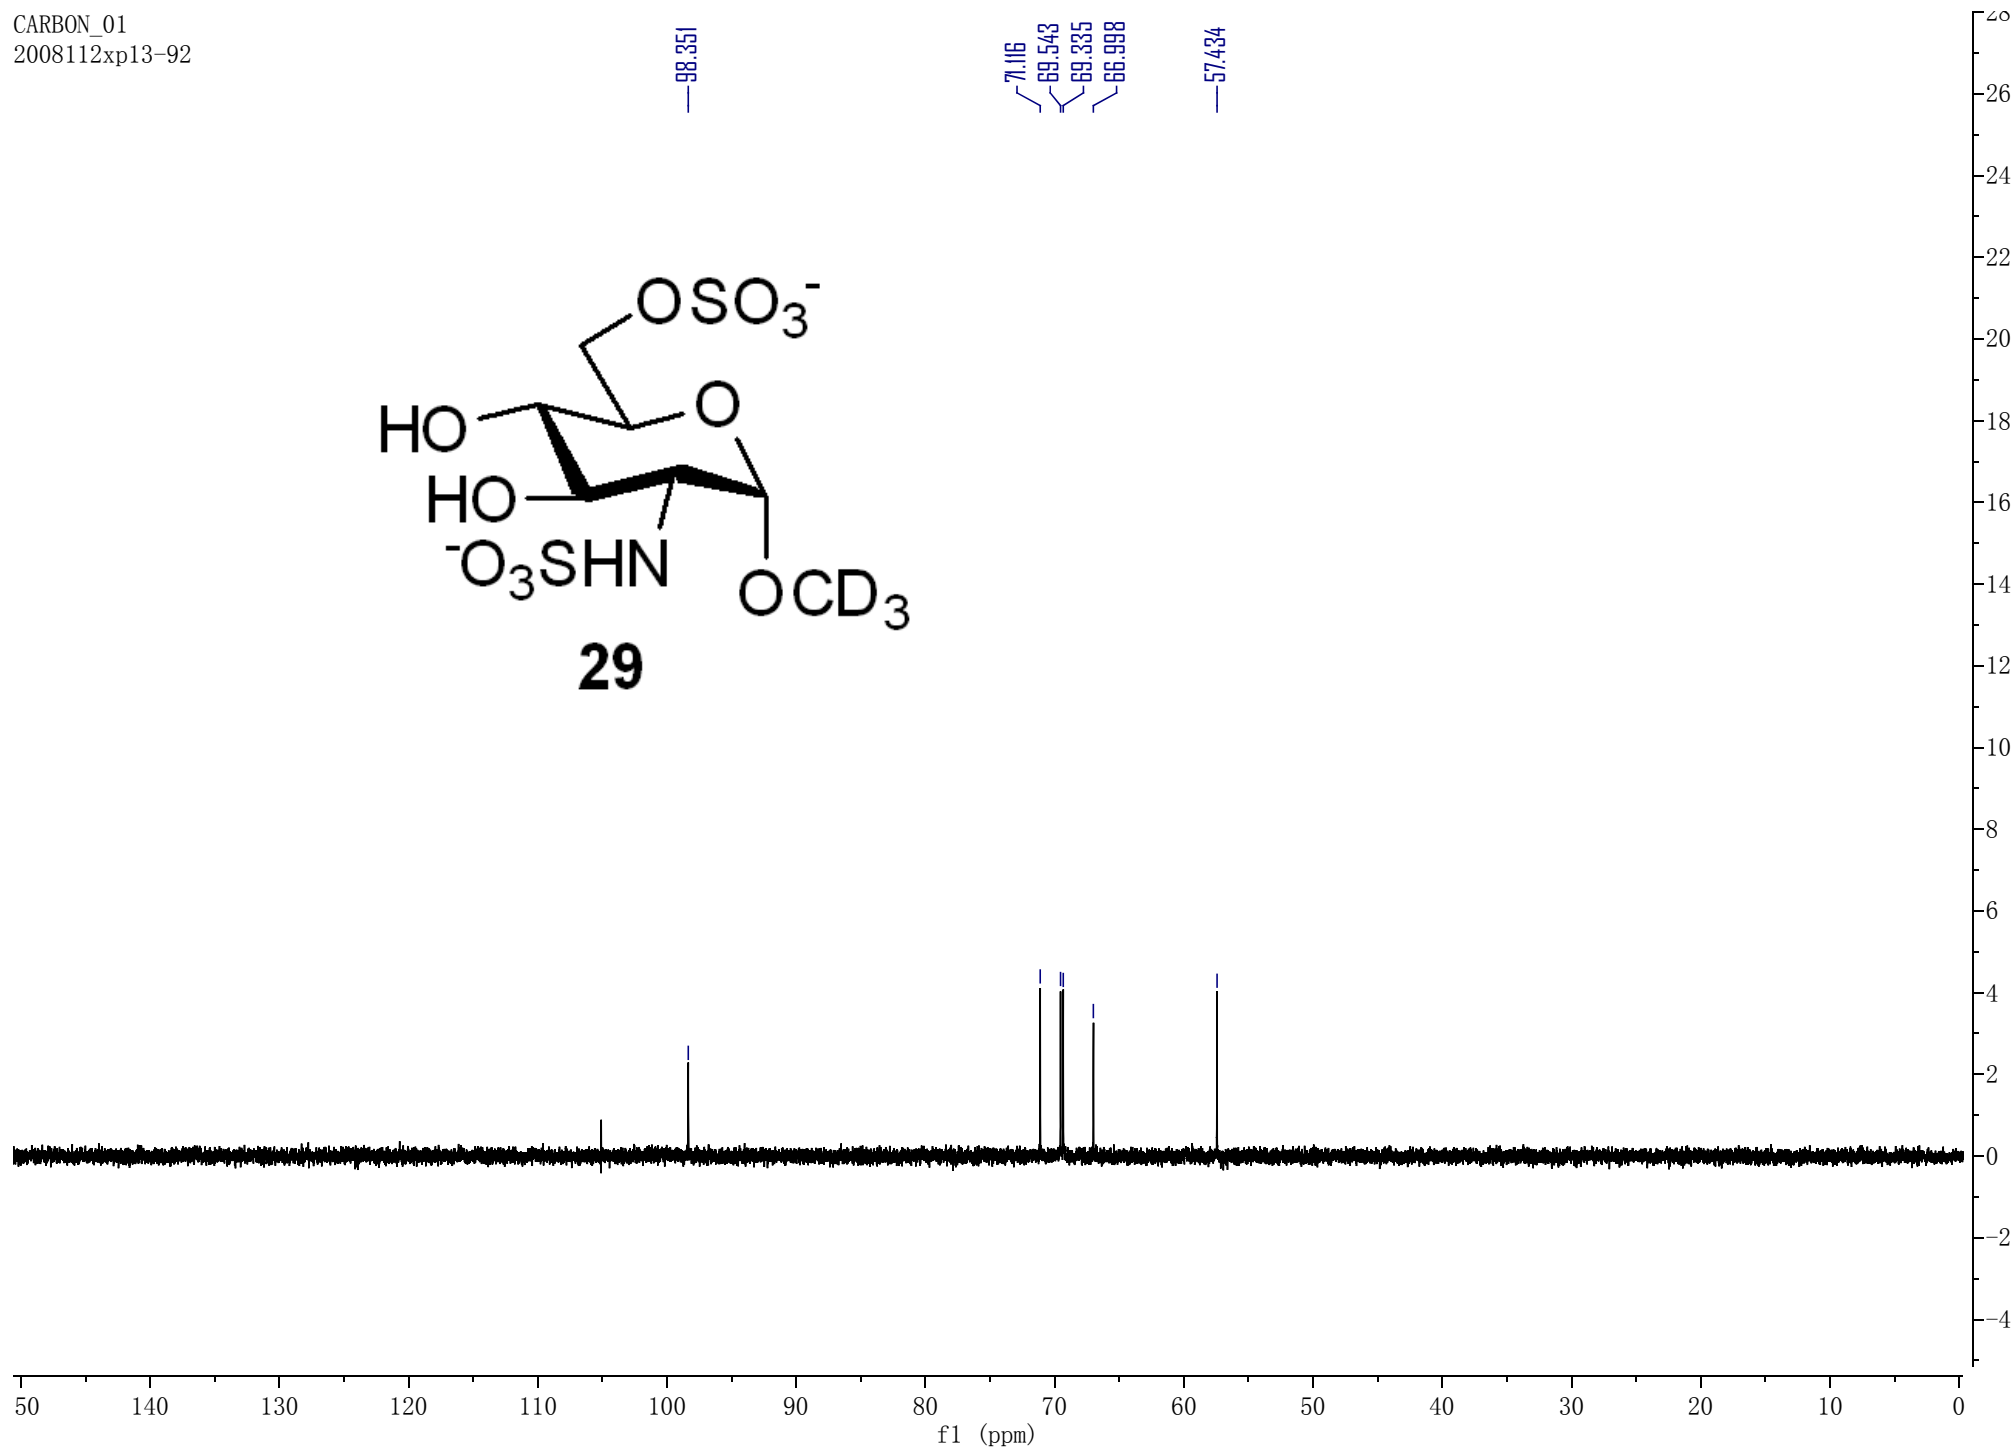



PROTON\_01  
Gradient Shimming

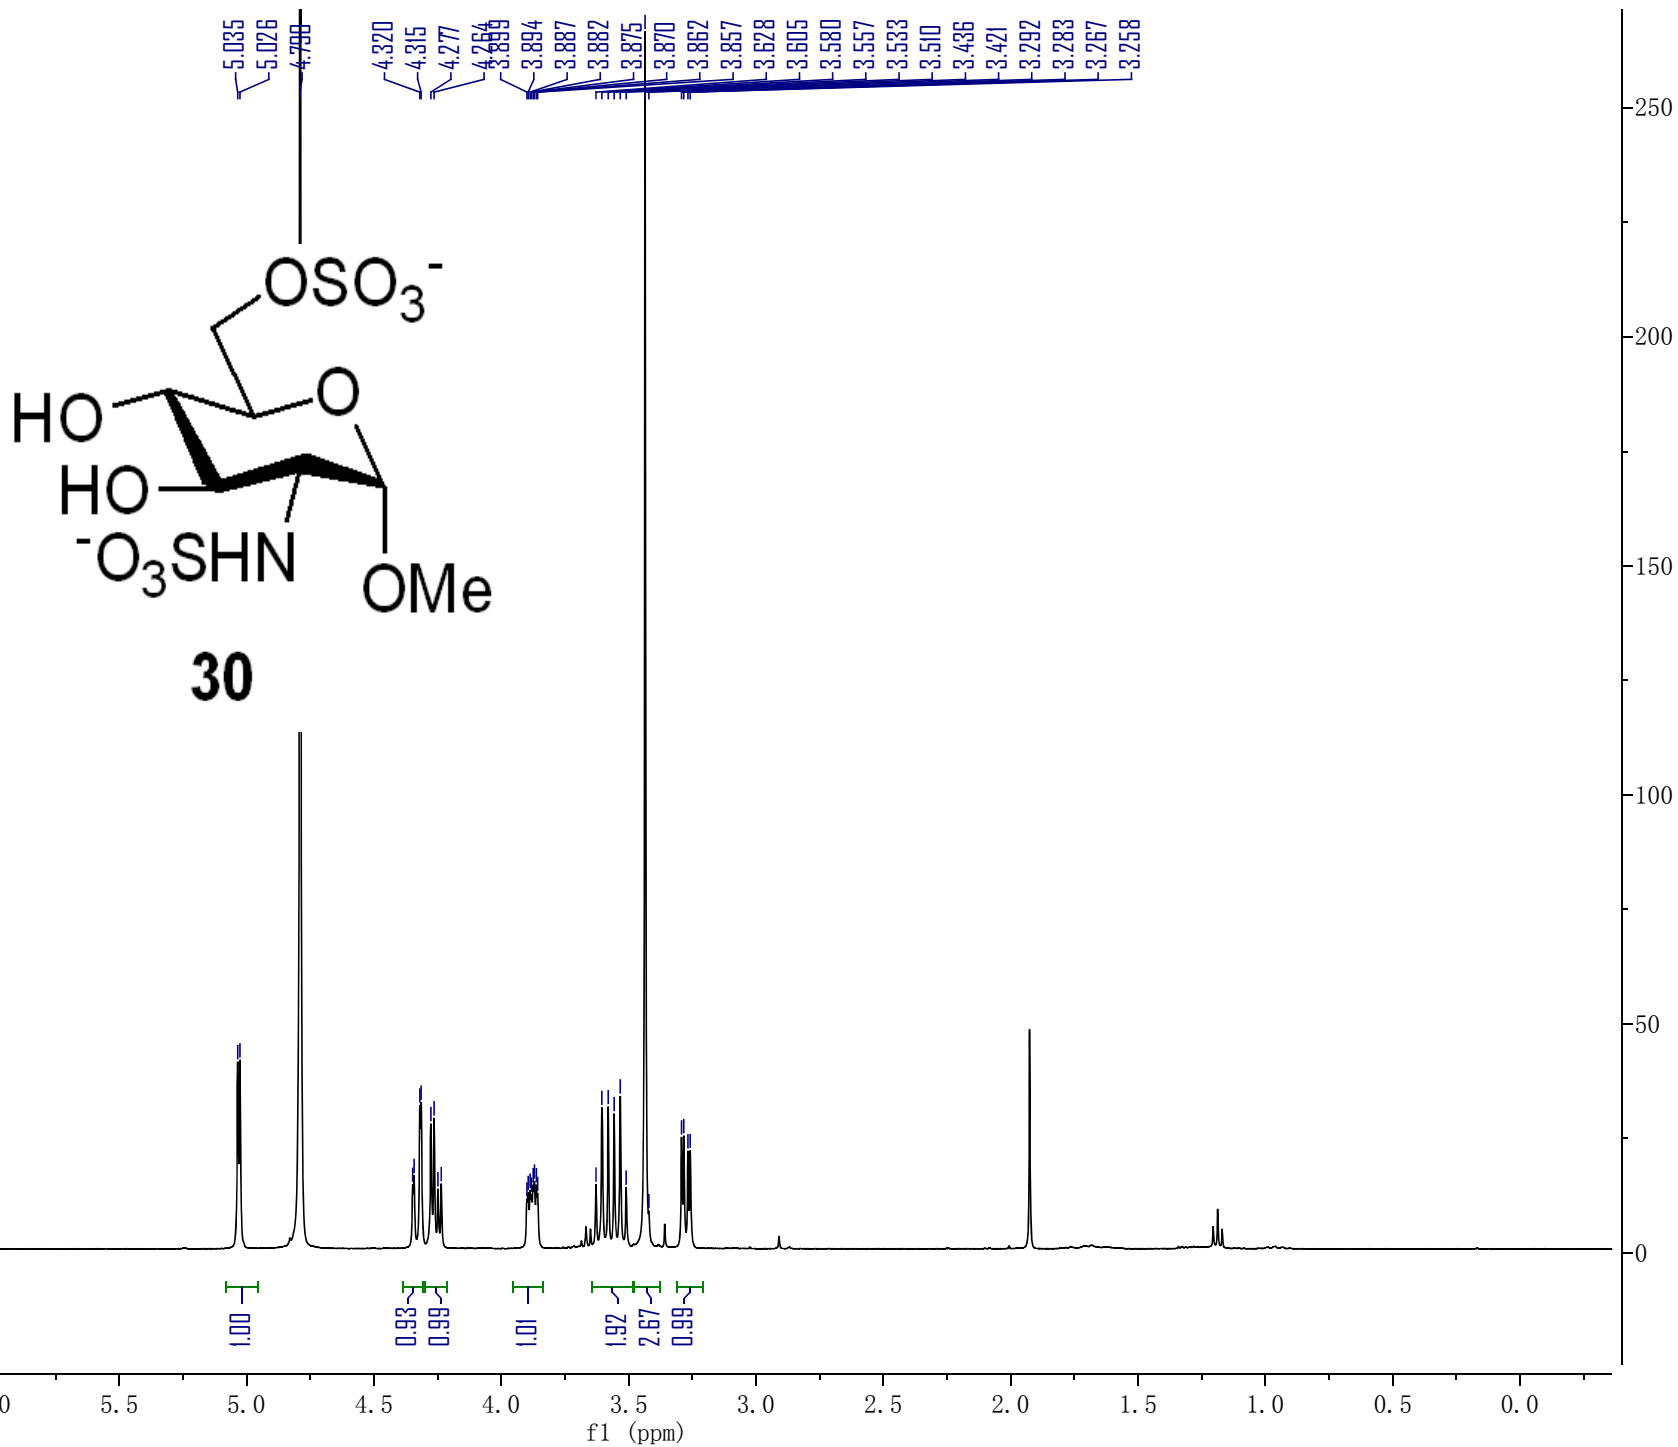

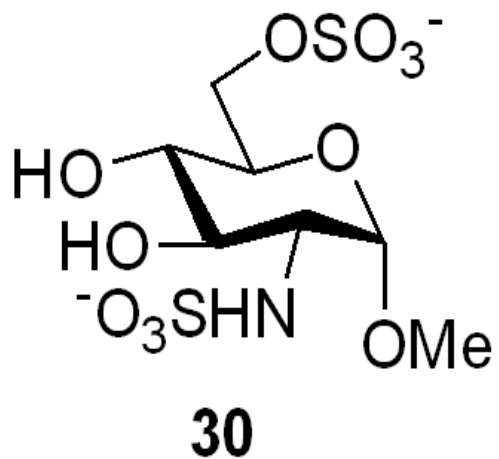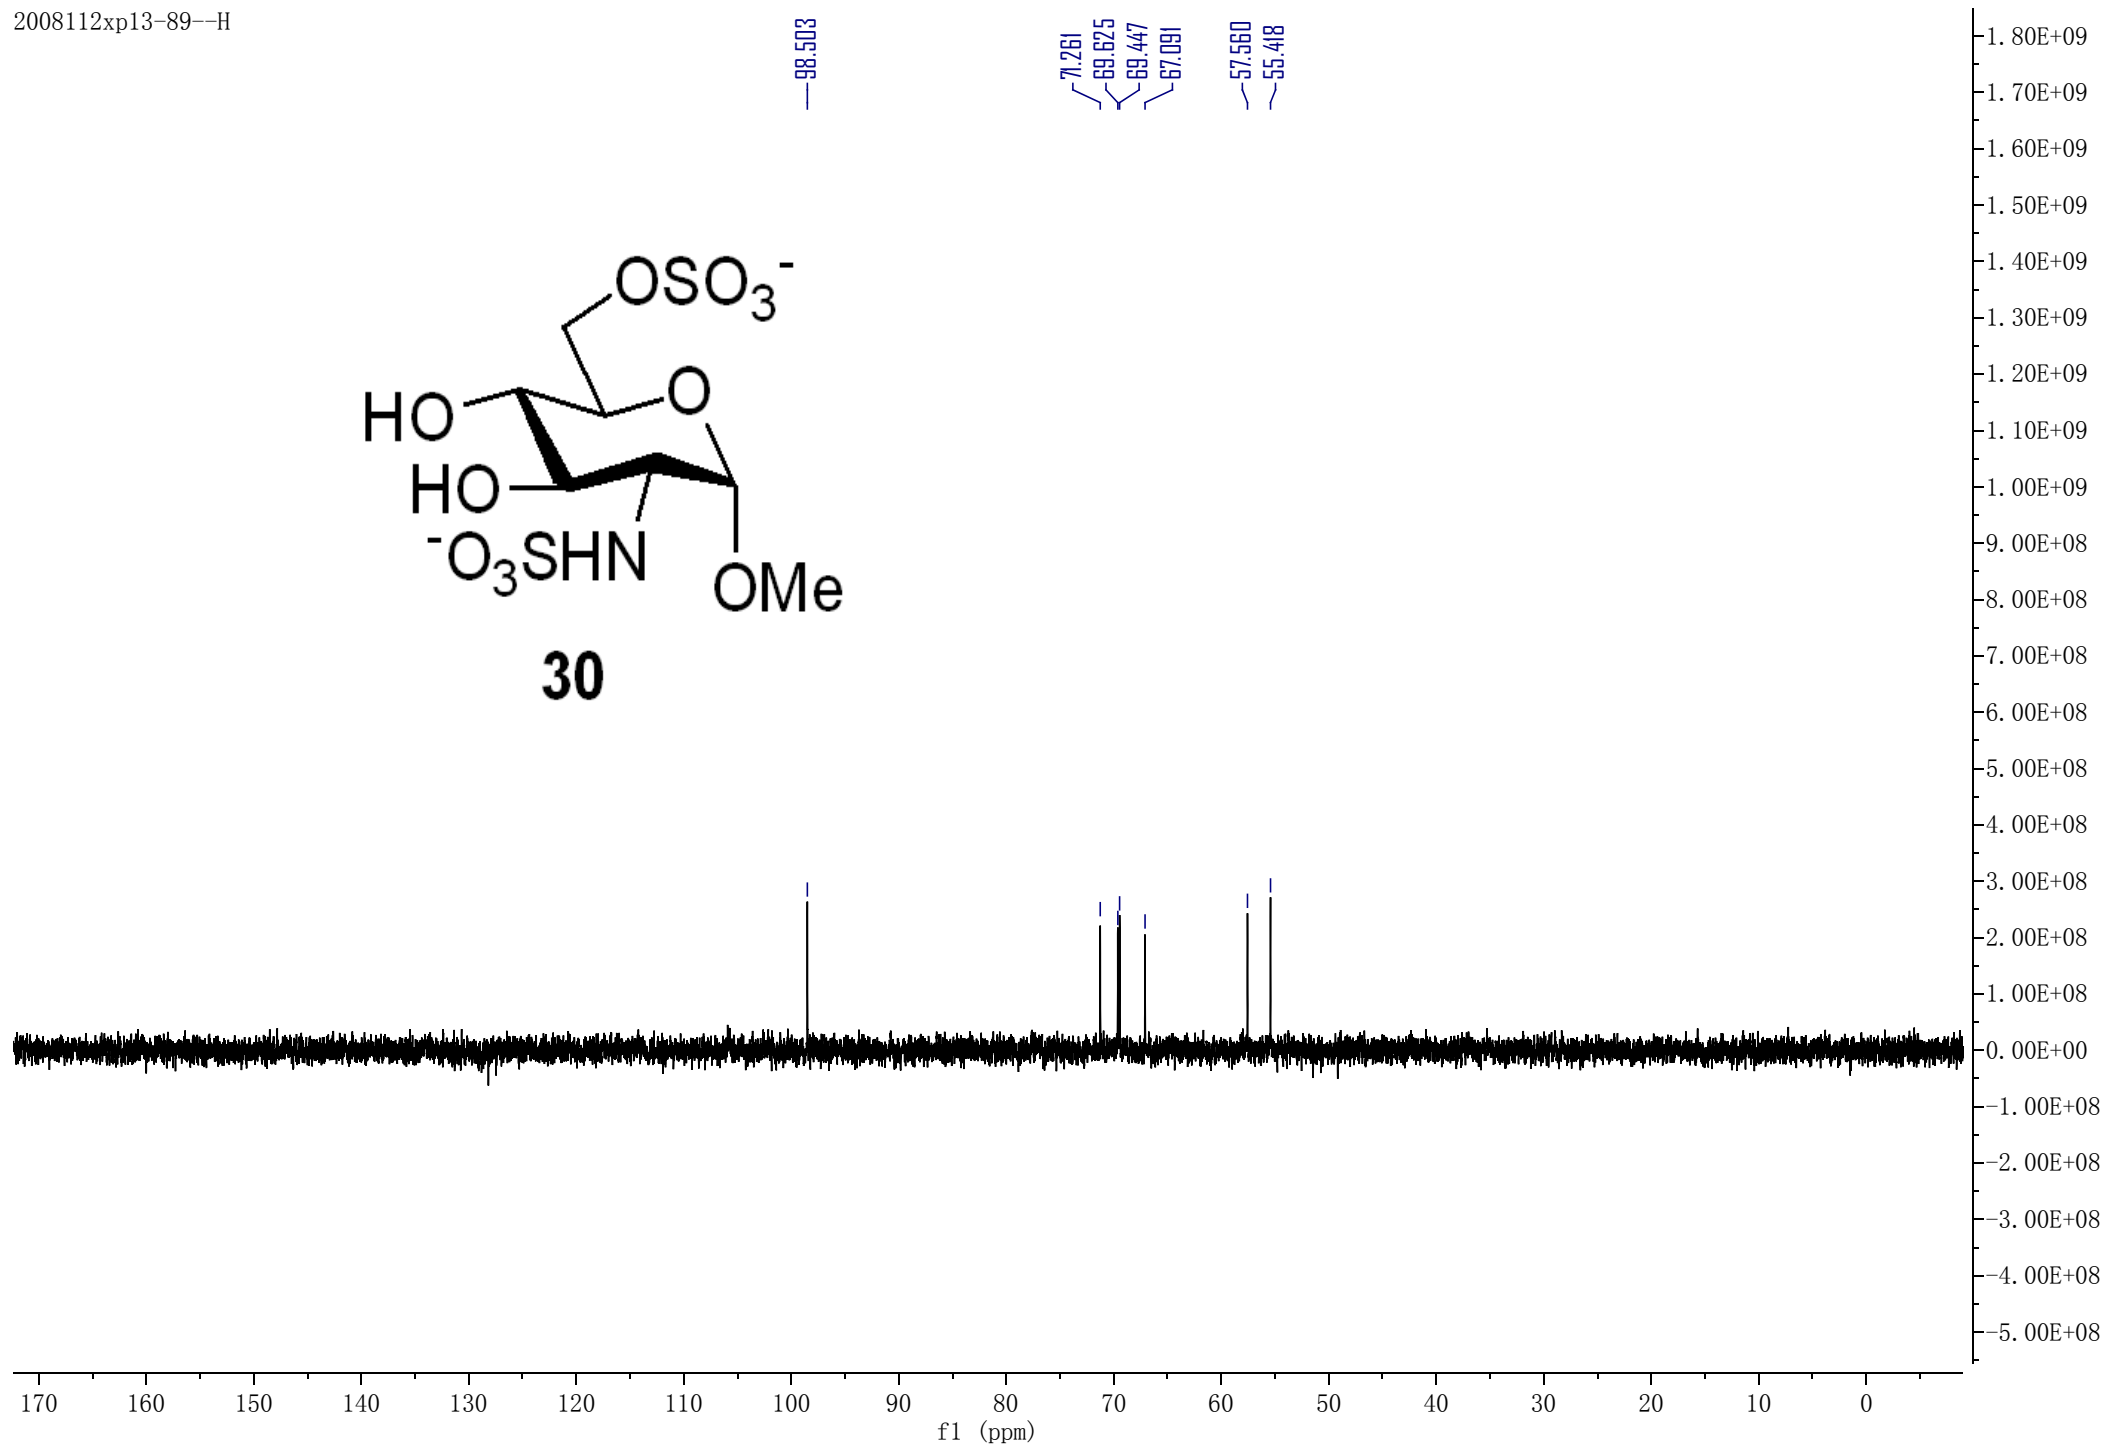

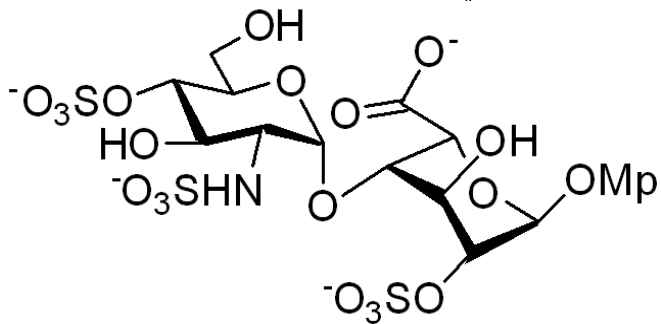

31

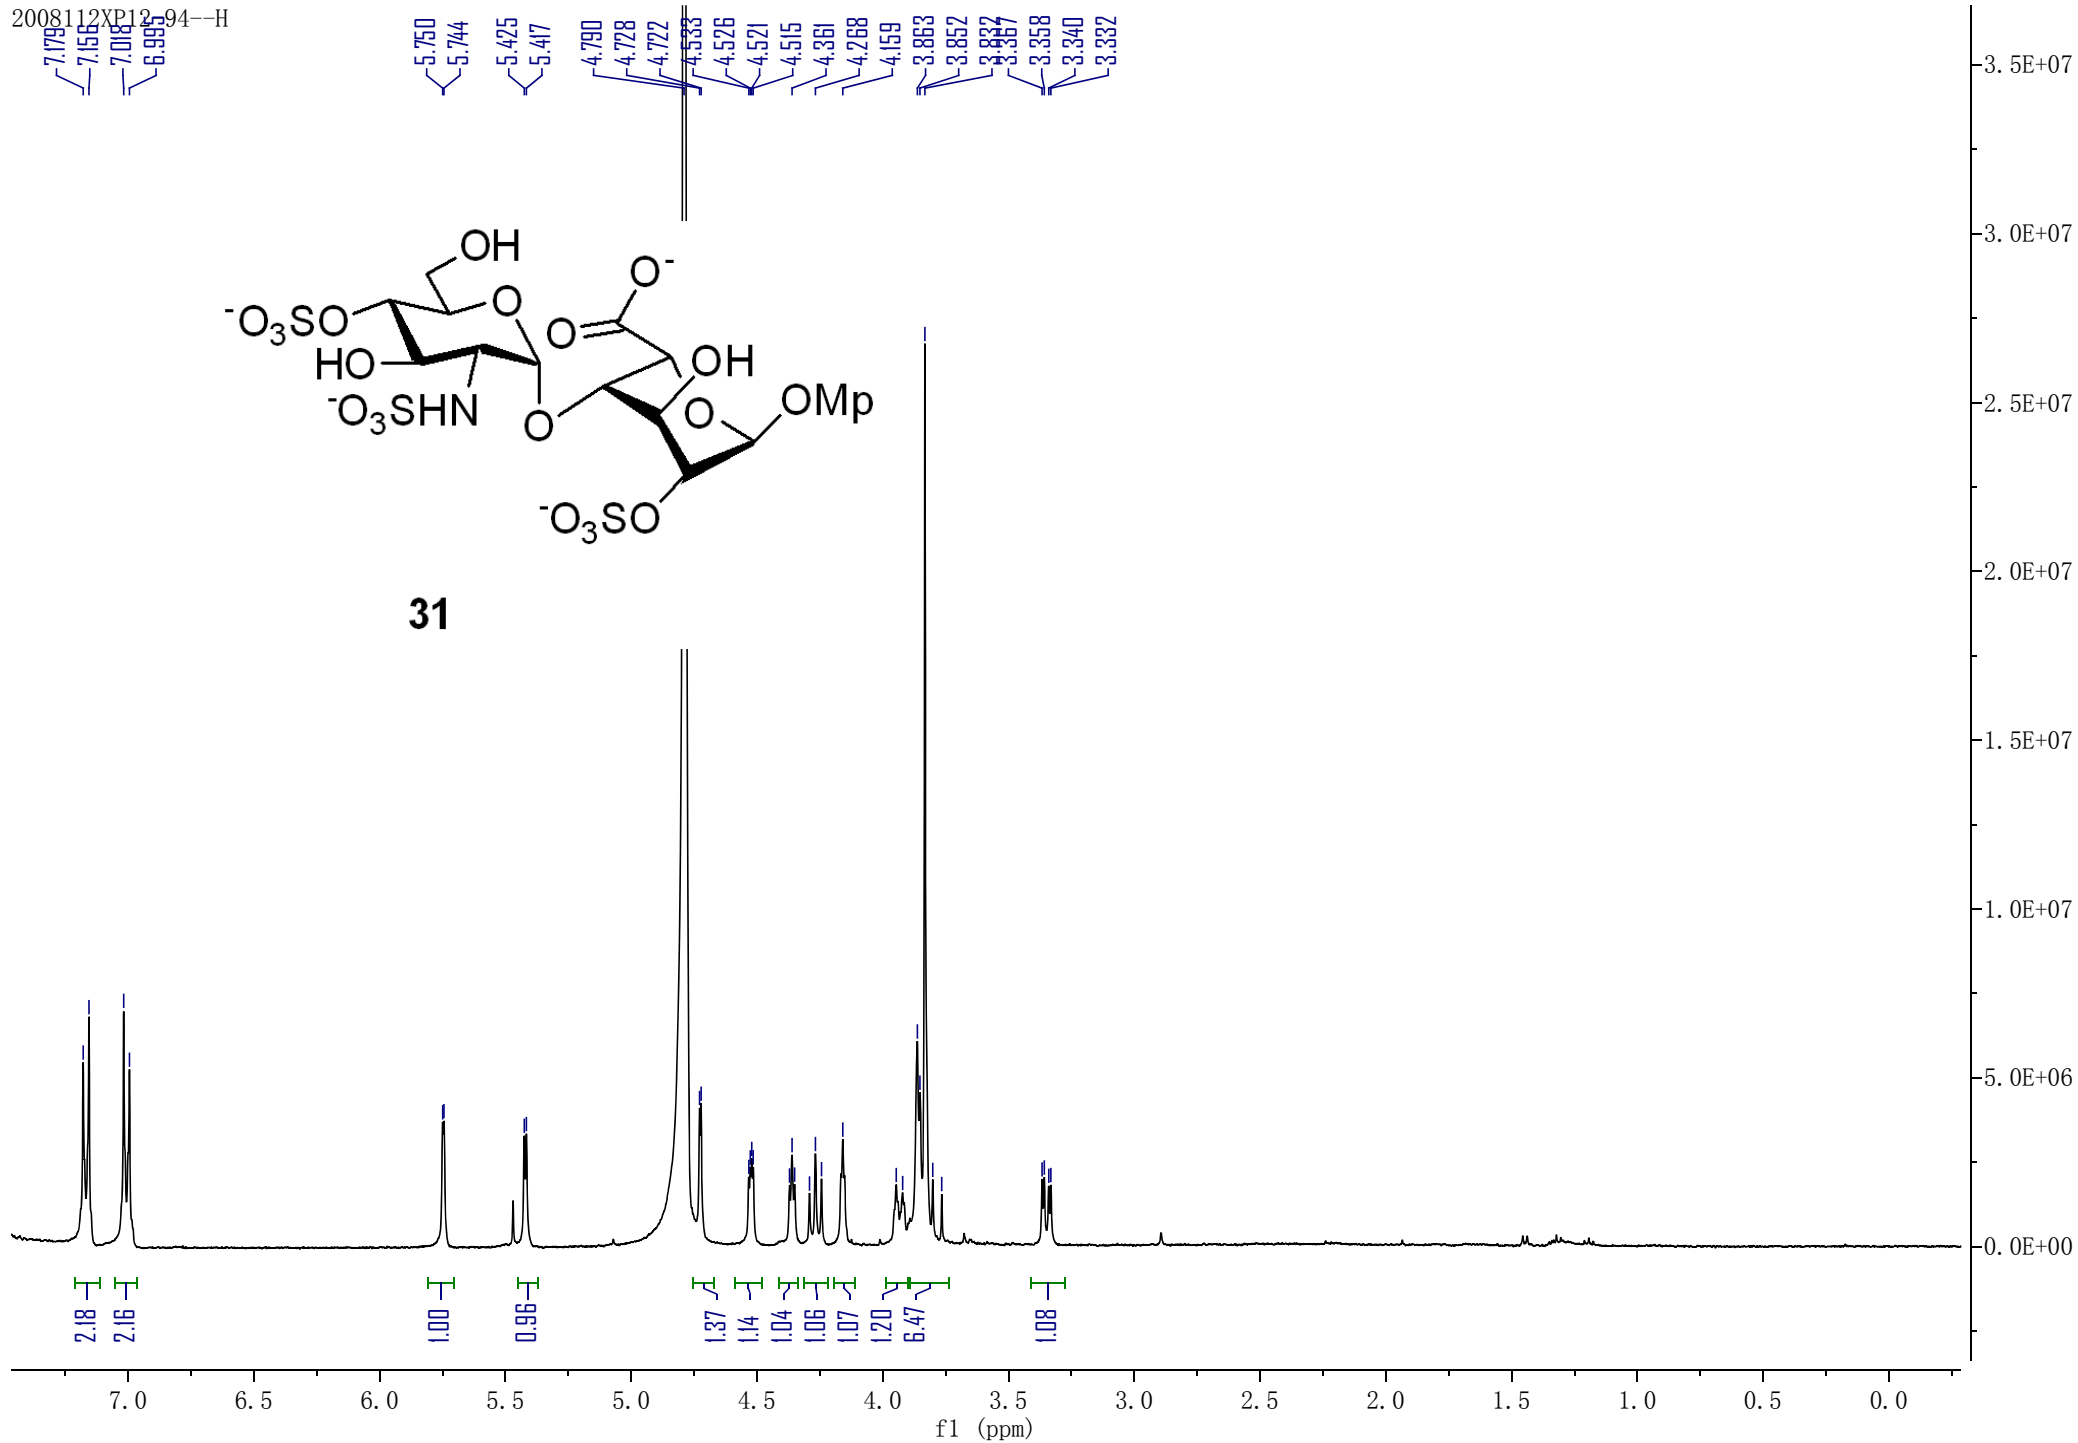

2012年10月

174.5369

154.902

150.369

129.271

125.435

119.682

115.183

99.206

97.025

77.179

76.102

75.610

70.255

69.617

69.067

68.509

60.220

57.963

55.917

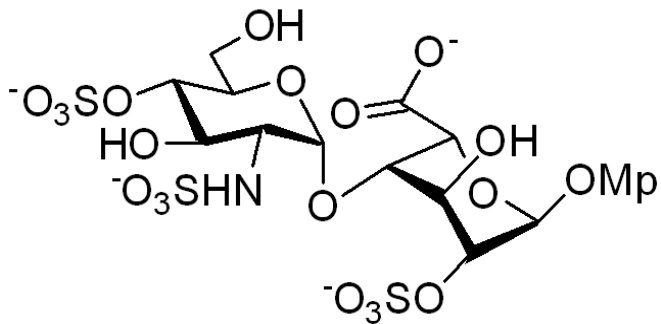

31

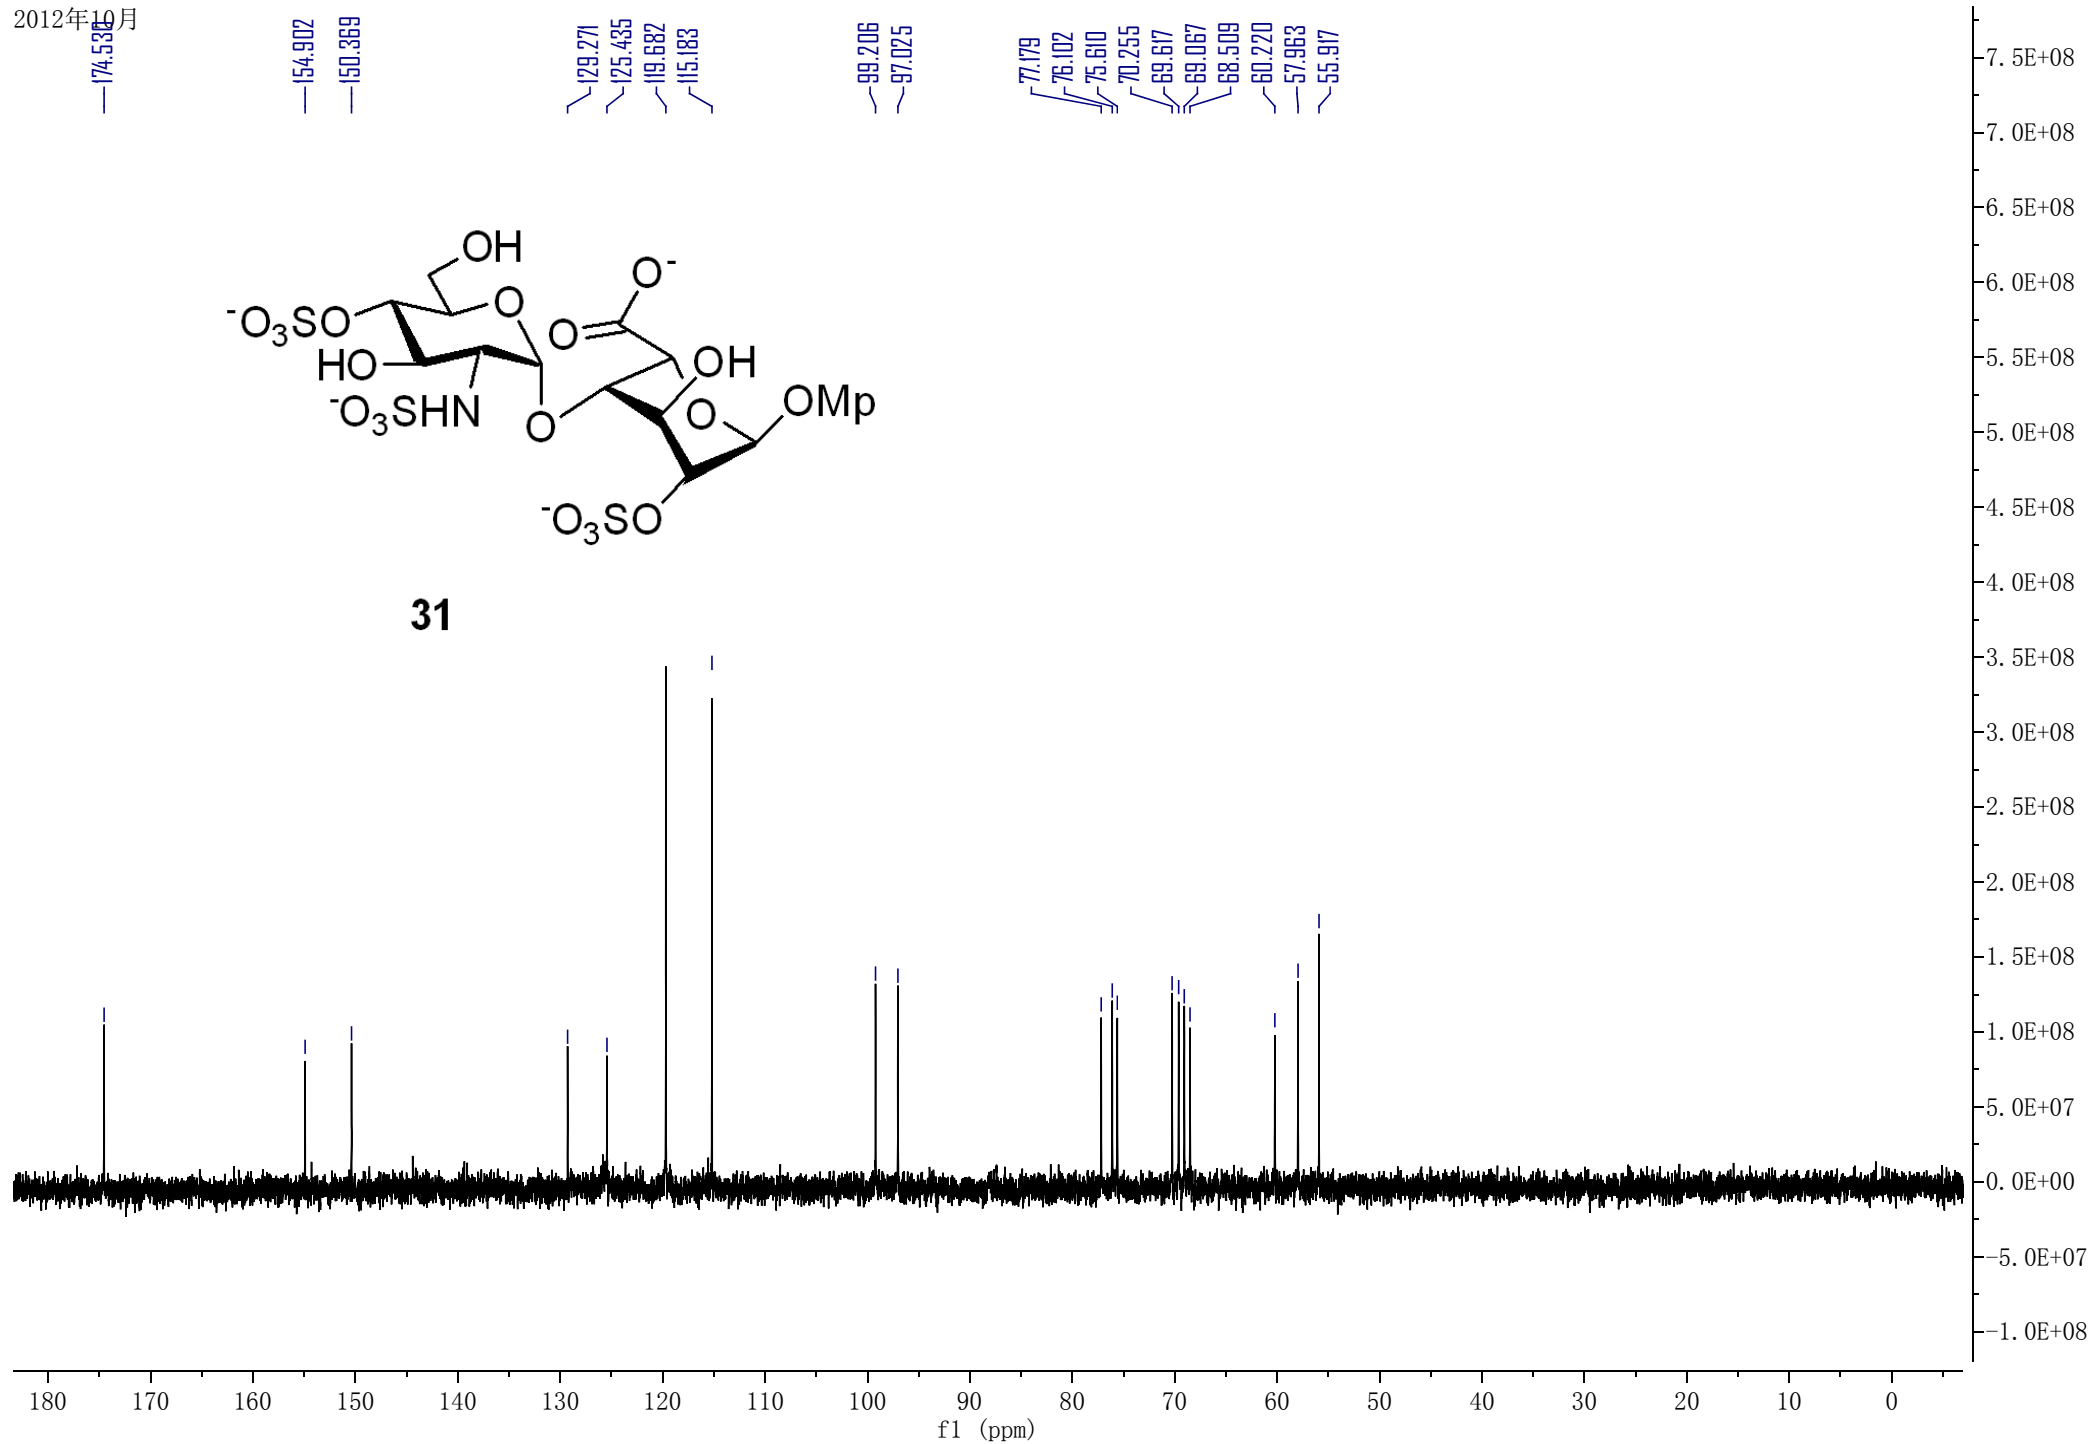

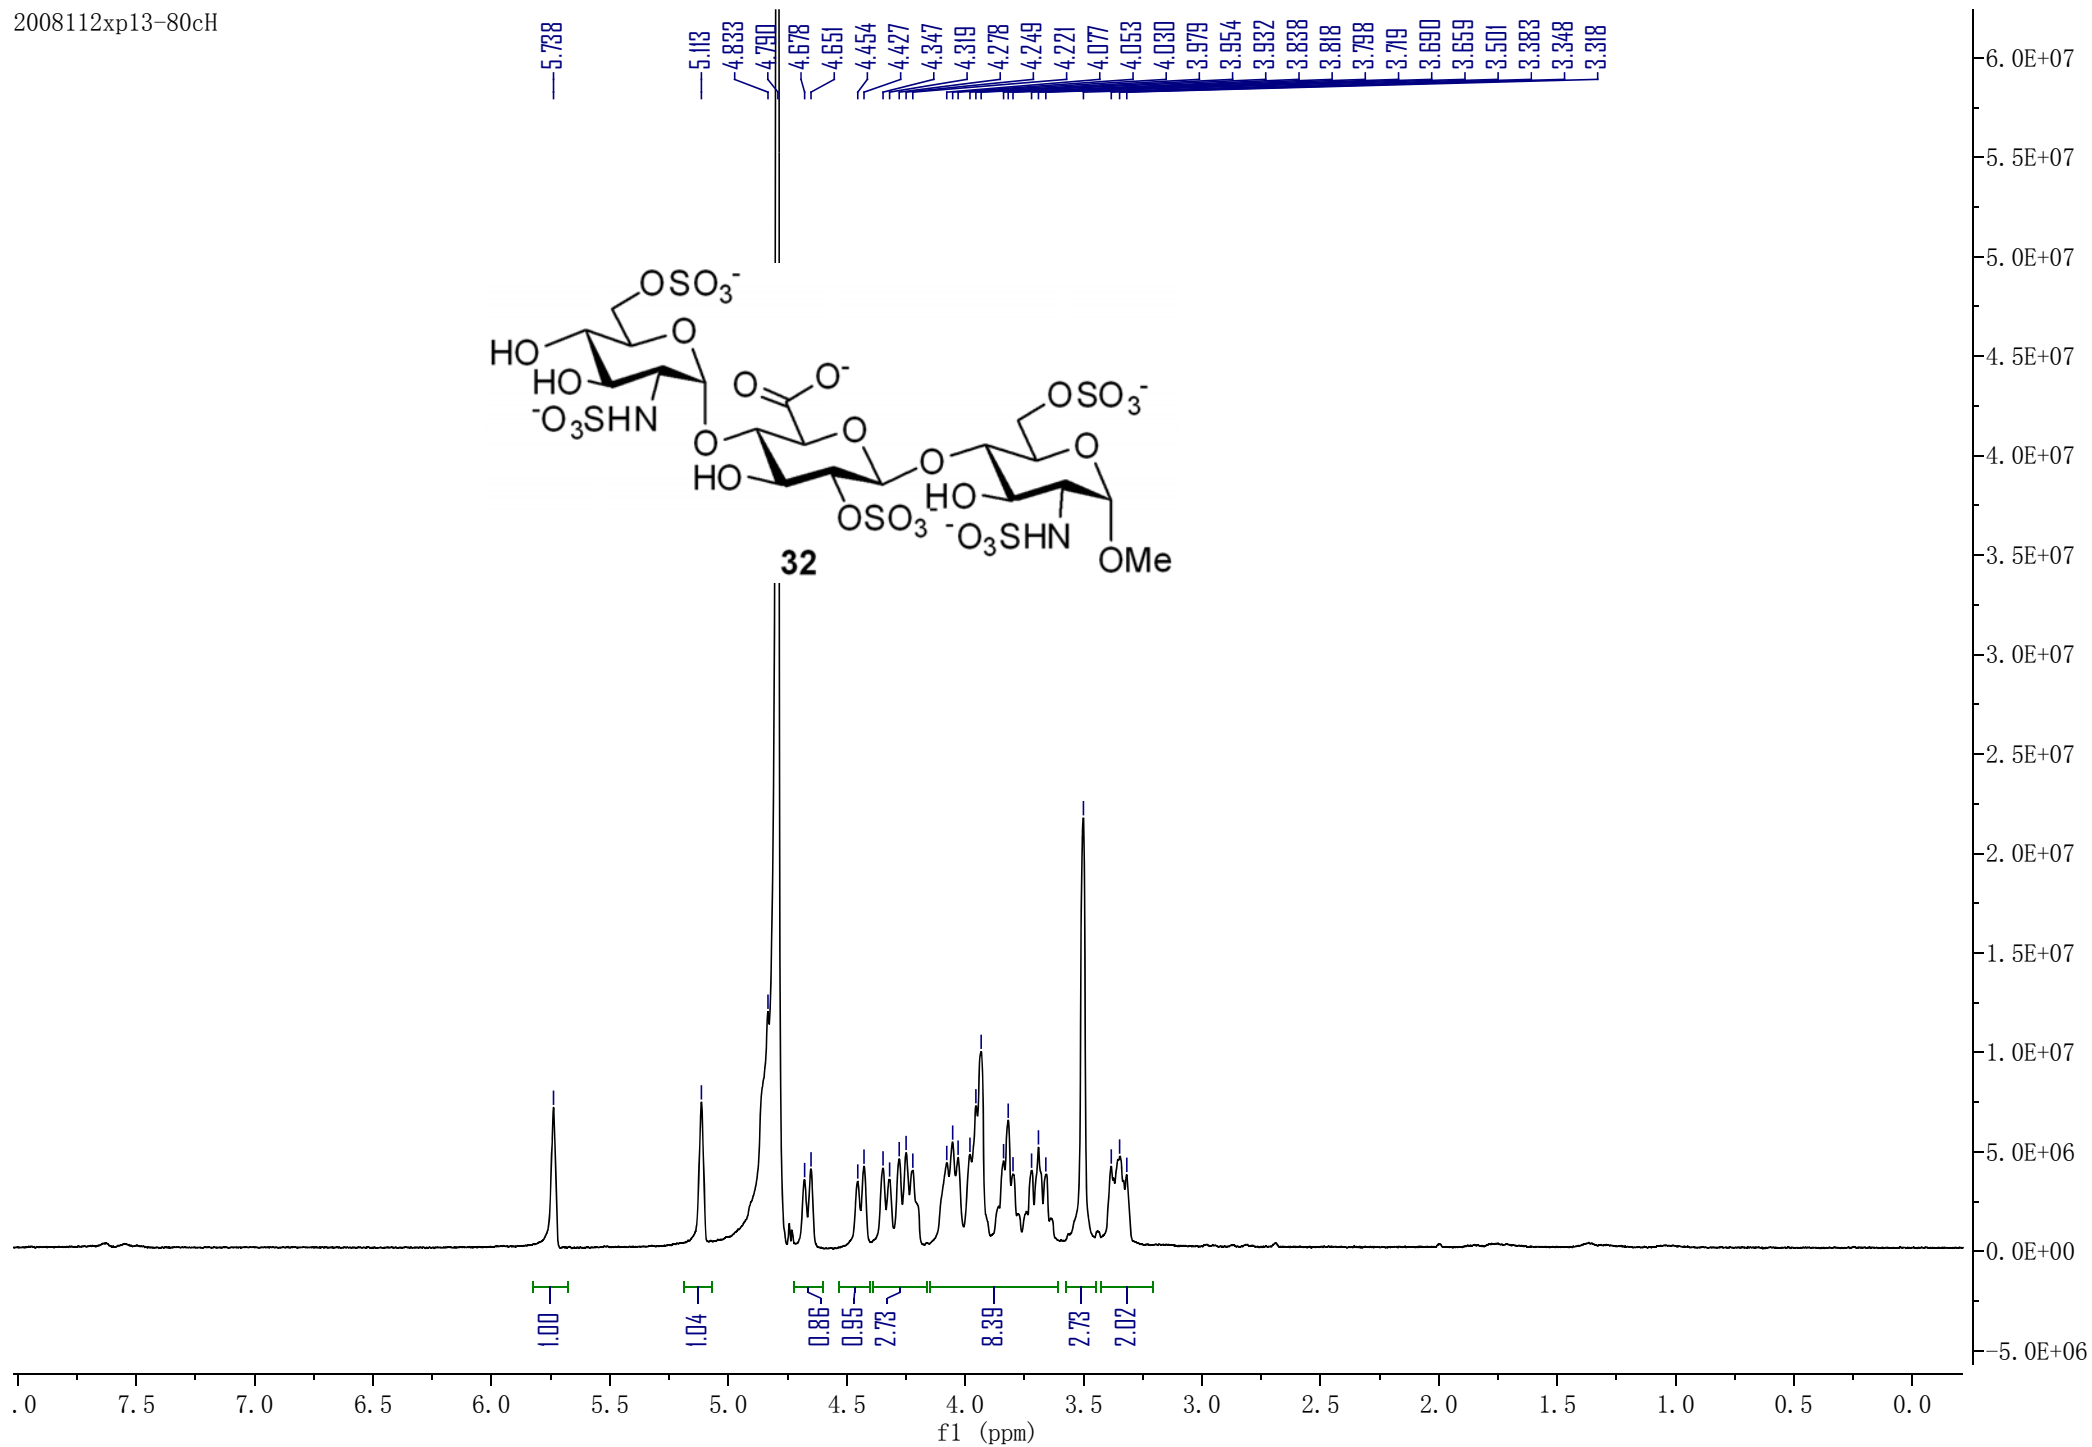

2012年12月

174.866

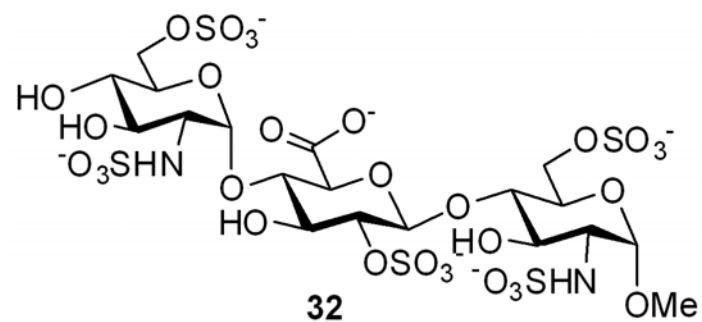

100.096  
98.365  
97.872  
79.963  
77.980  
76.498  
75.093  
71.331  
69.998  
69.533  
69.159  
68.146  
57.989  
57.319  
55.563

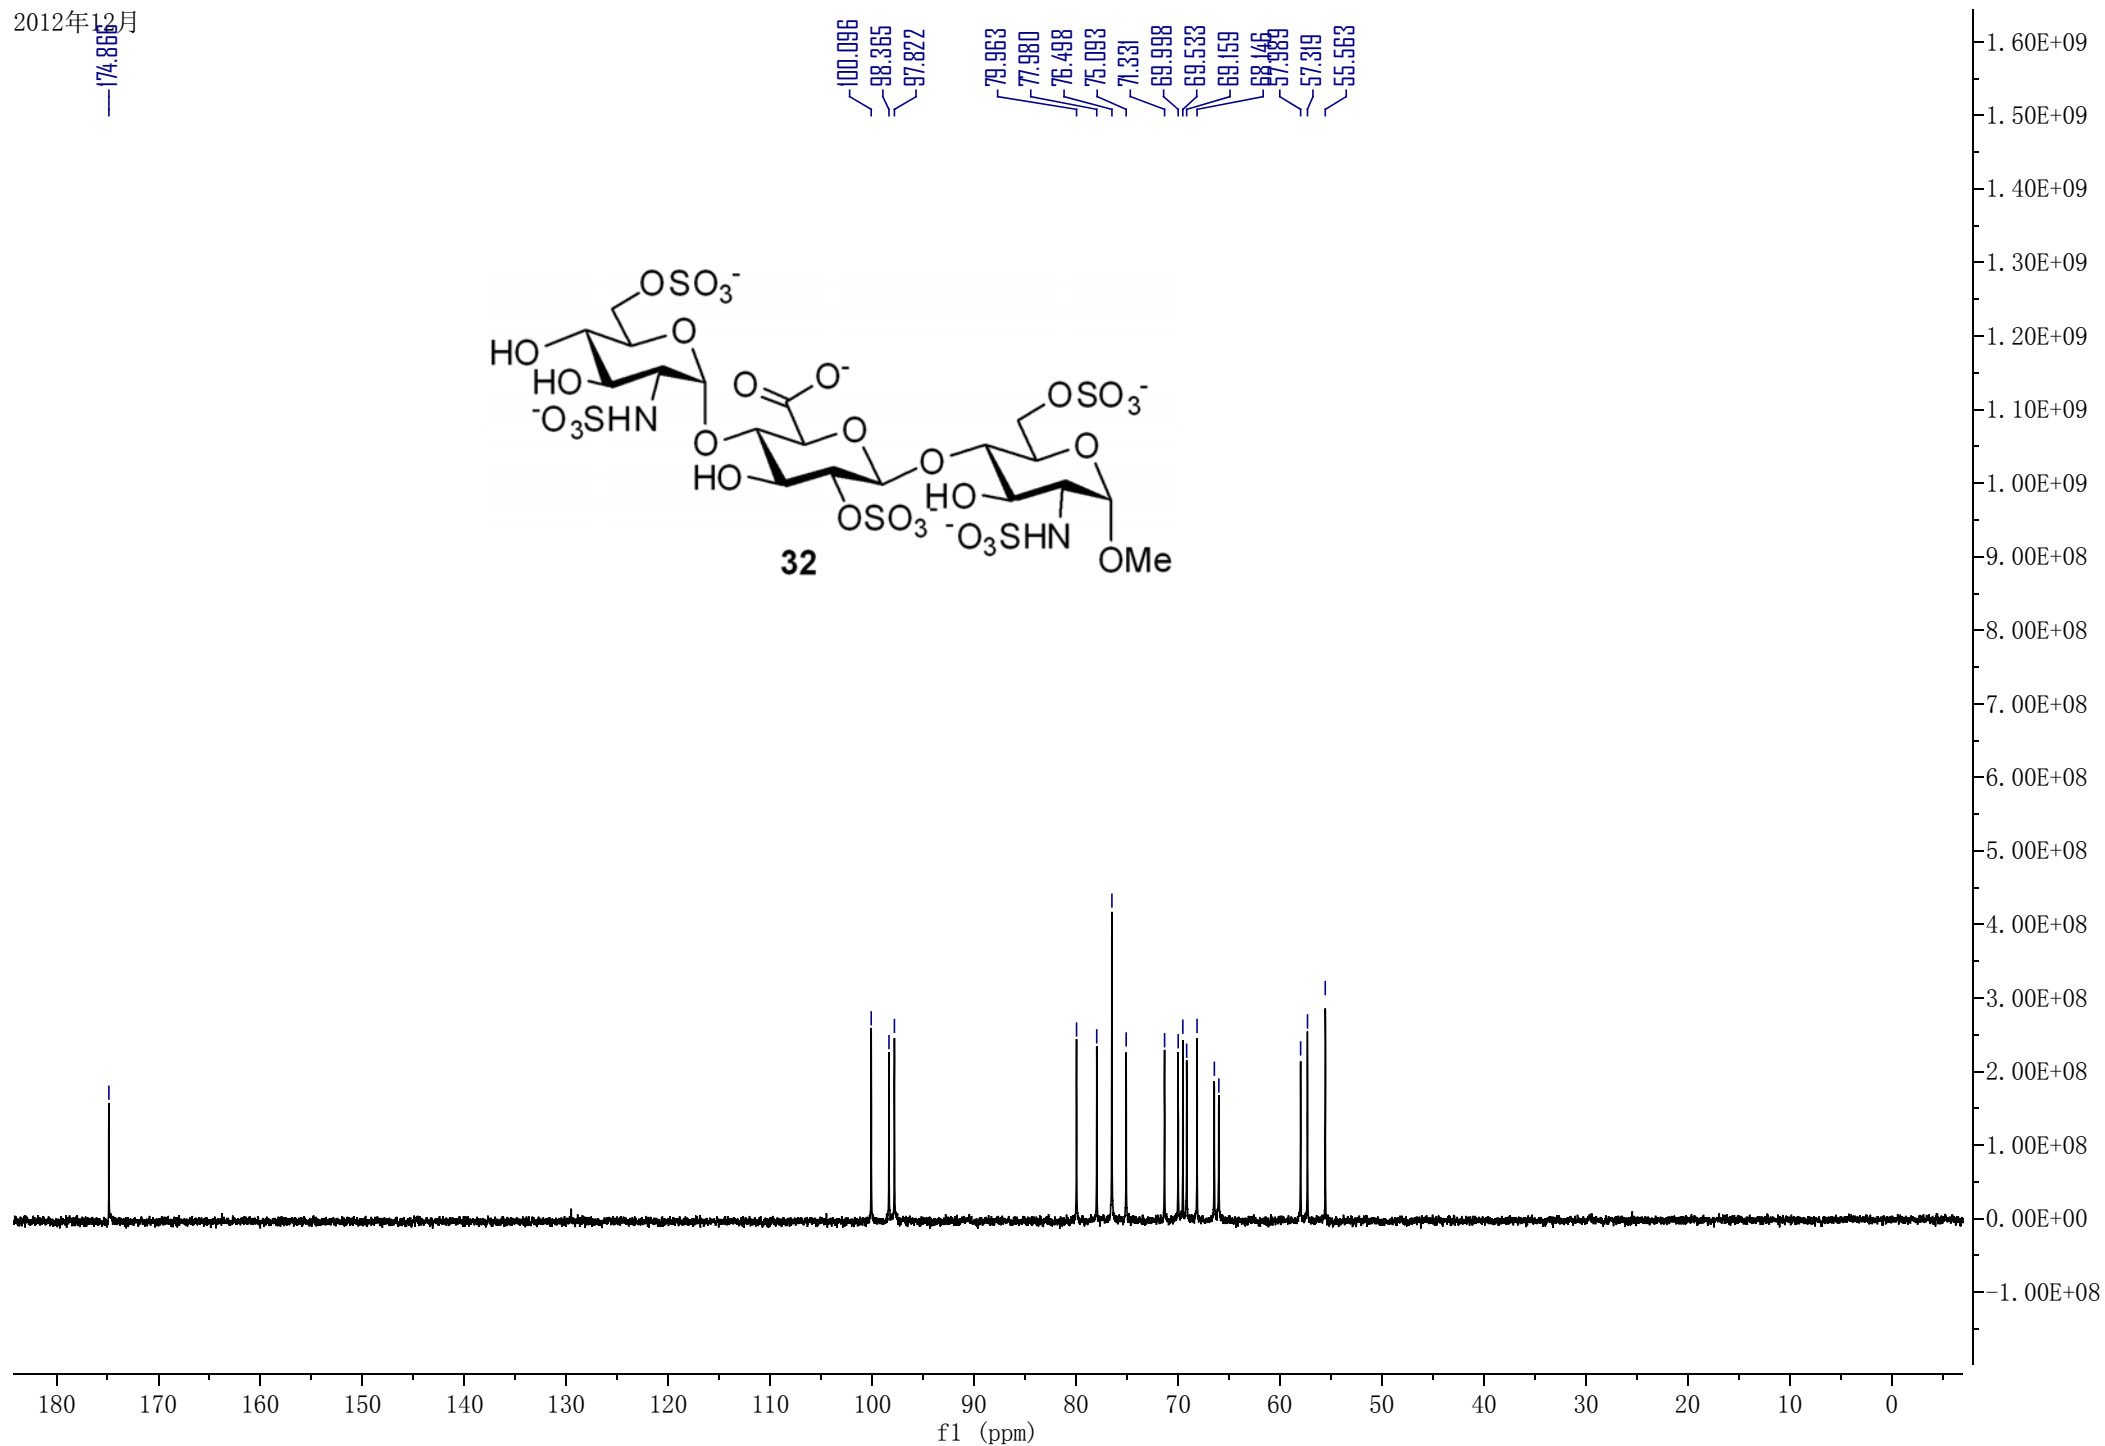

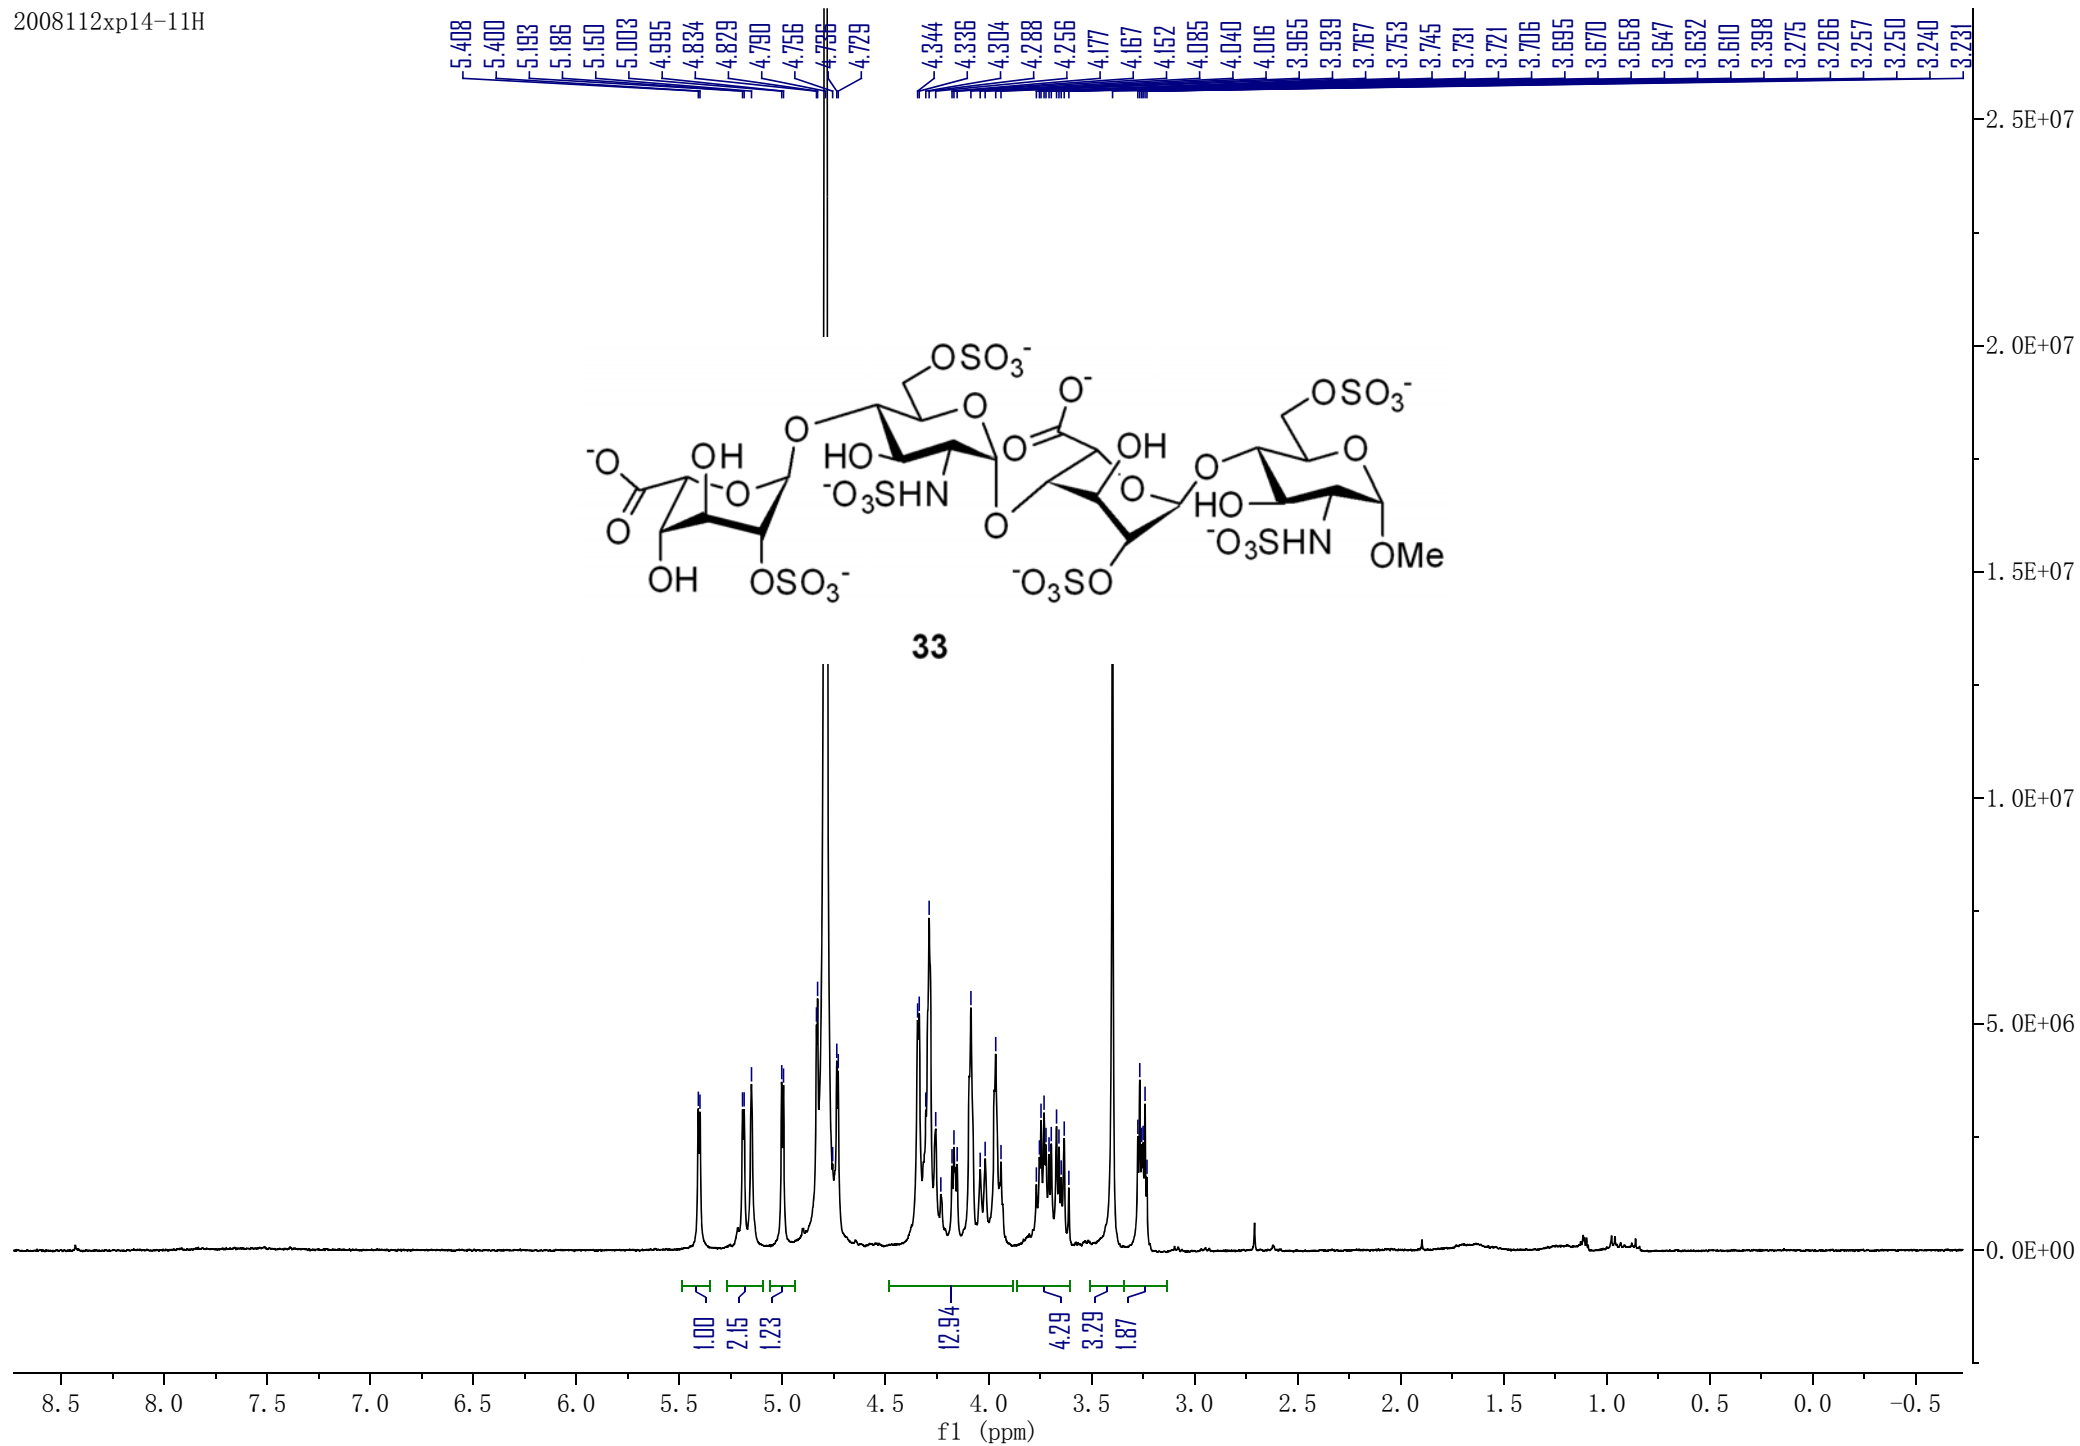

2011年11月

176.383  
174.527

99.466  
99.191  
98.316  
96.510  
76.042  
69.978  
69.717  
69.206  
68.979  
58.078  
57.803  
55.500

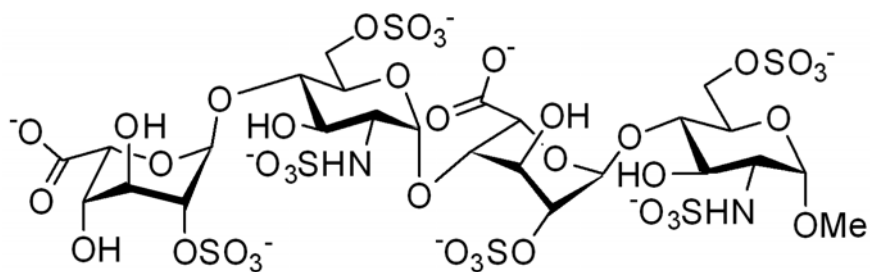

33

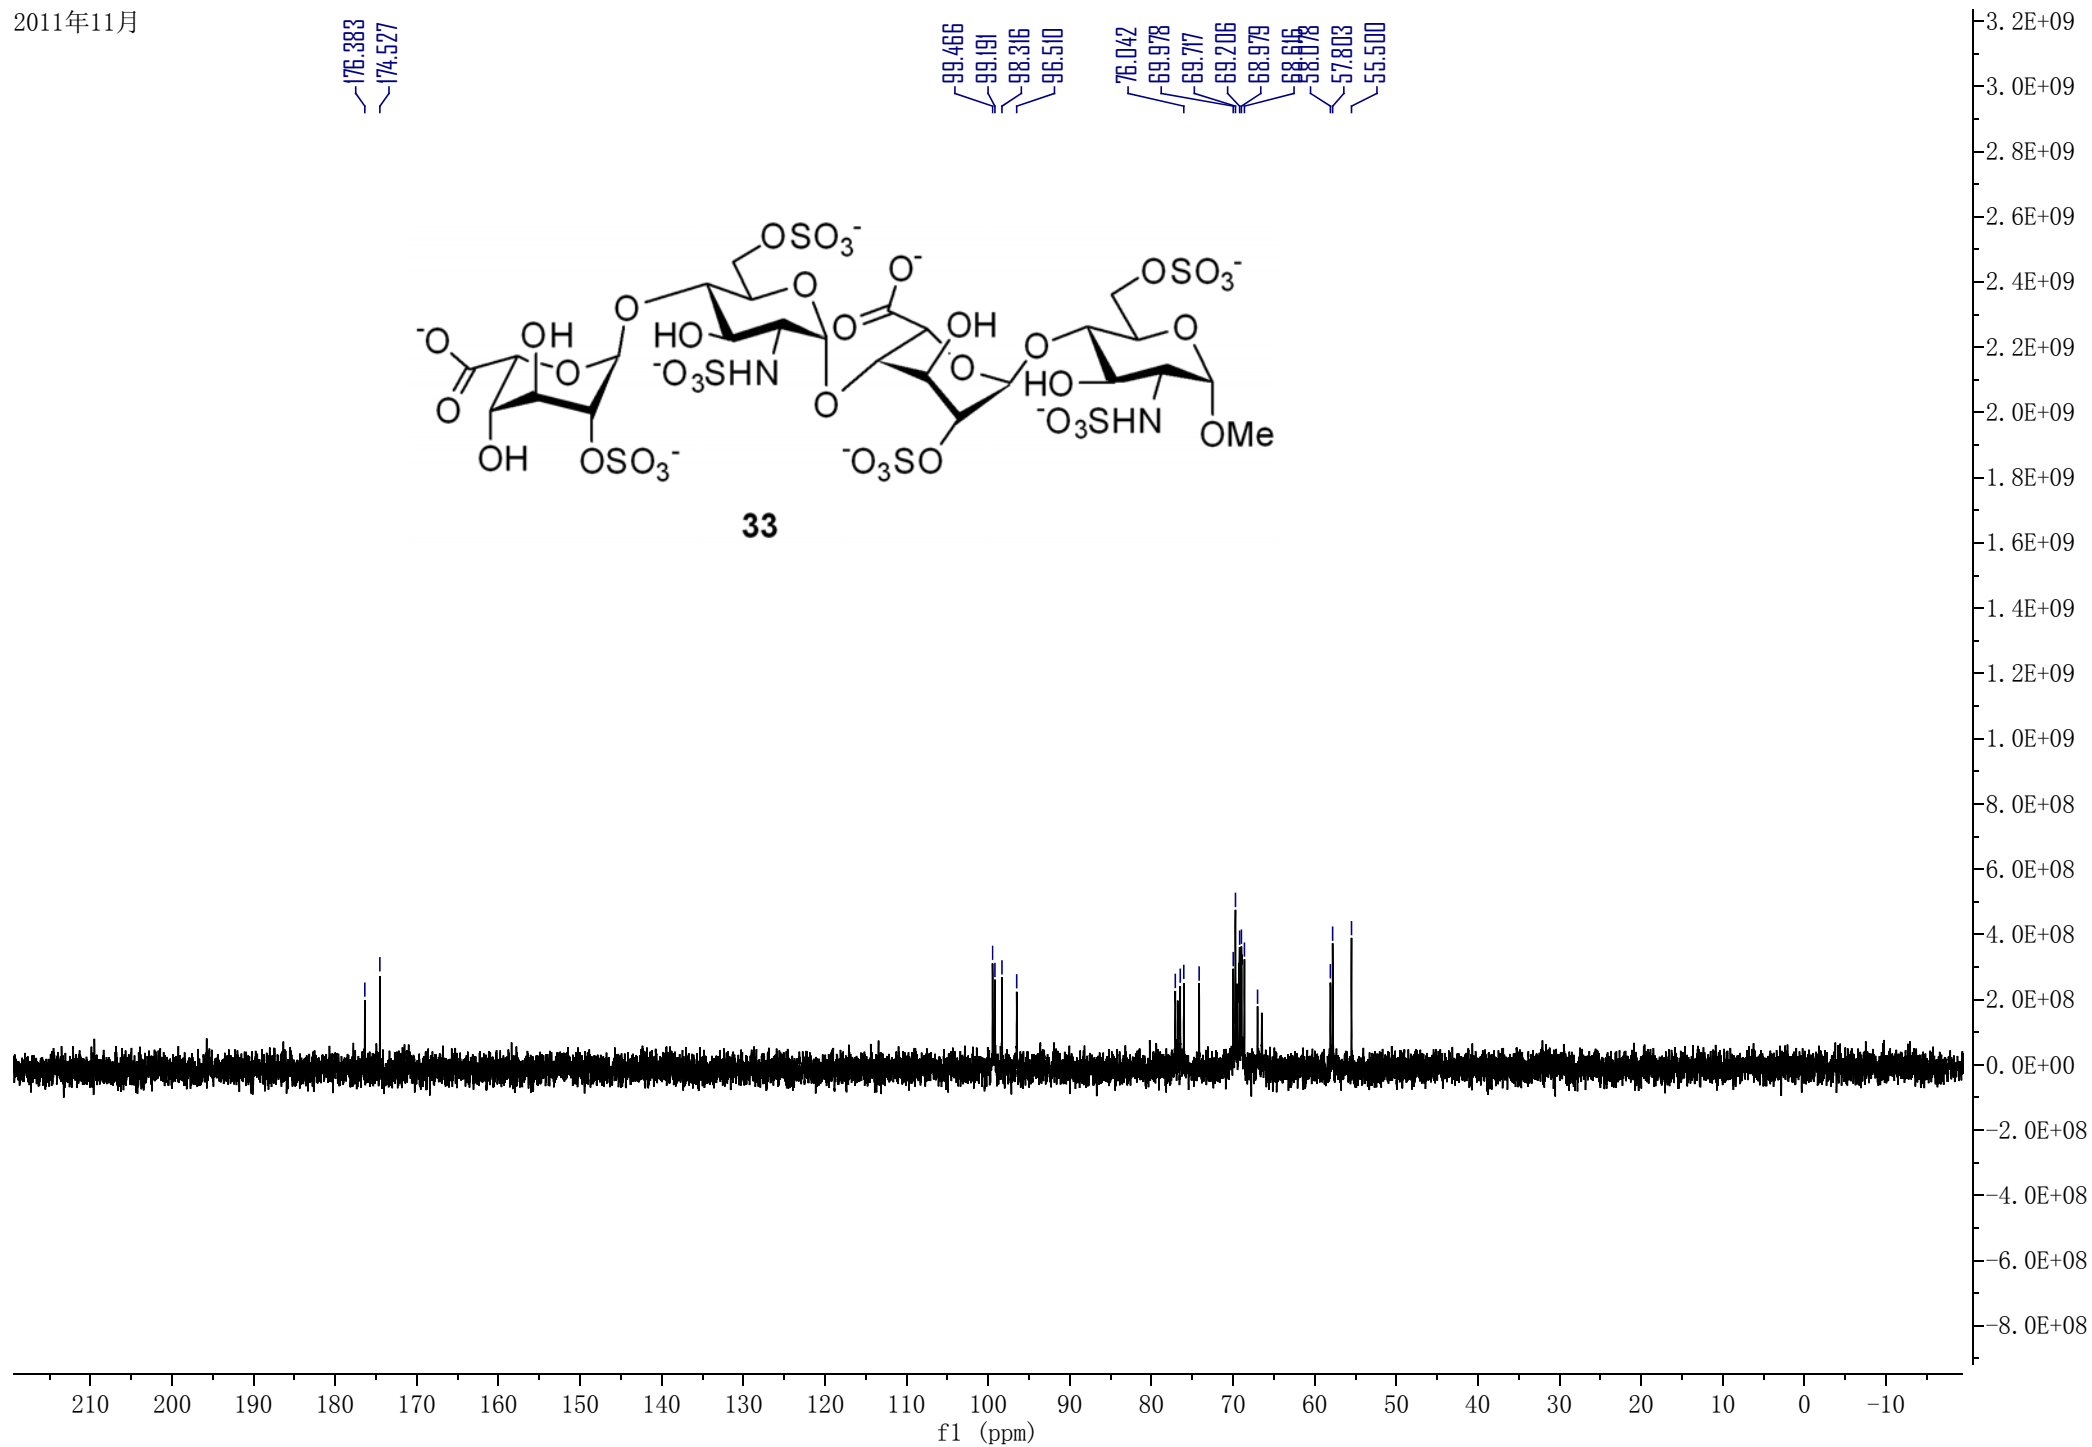



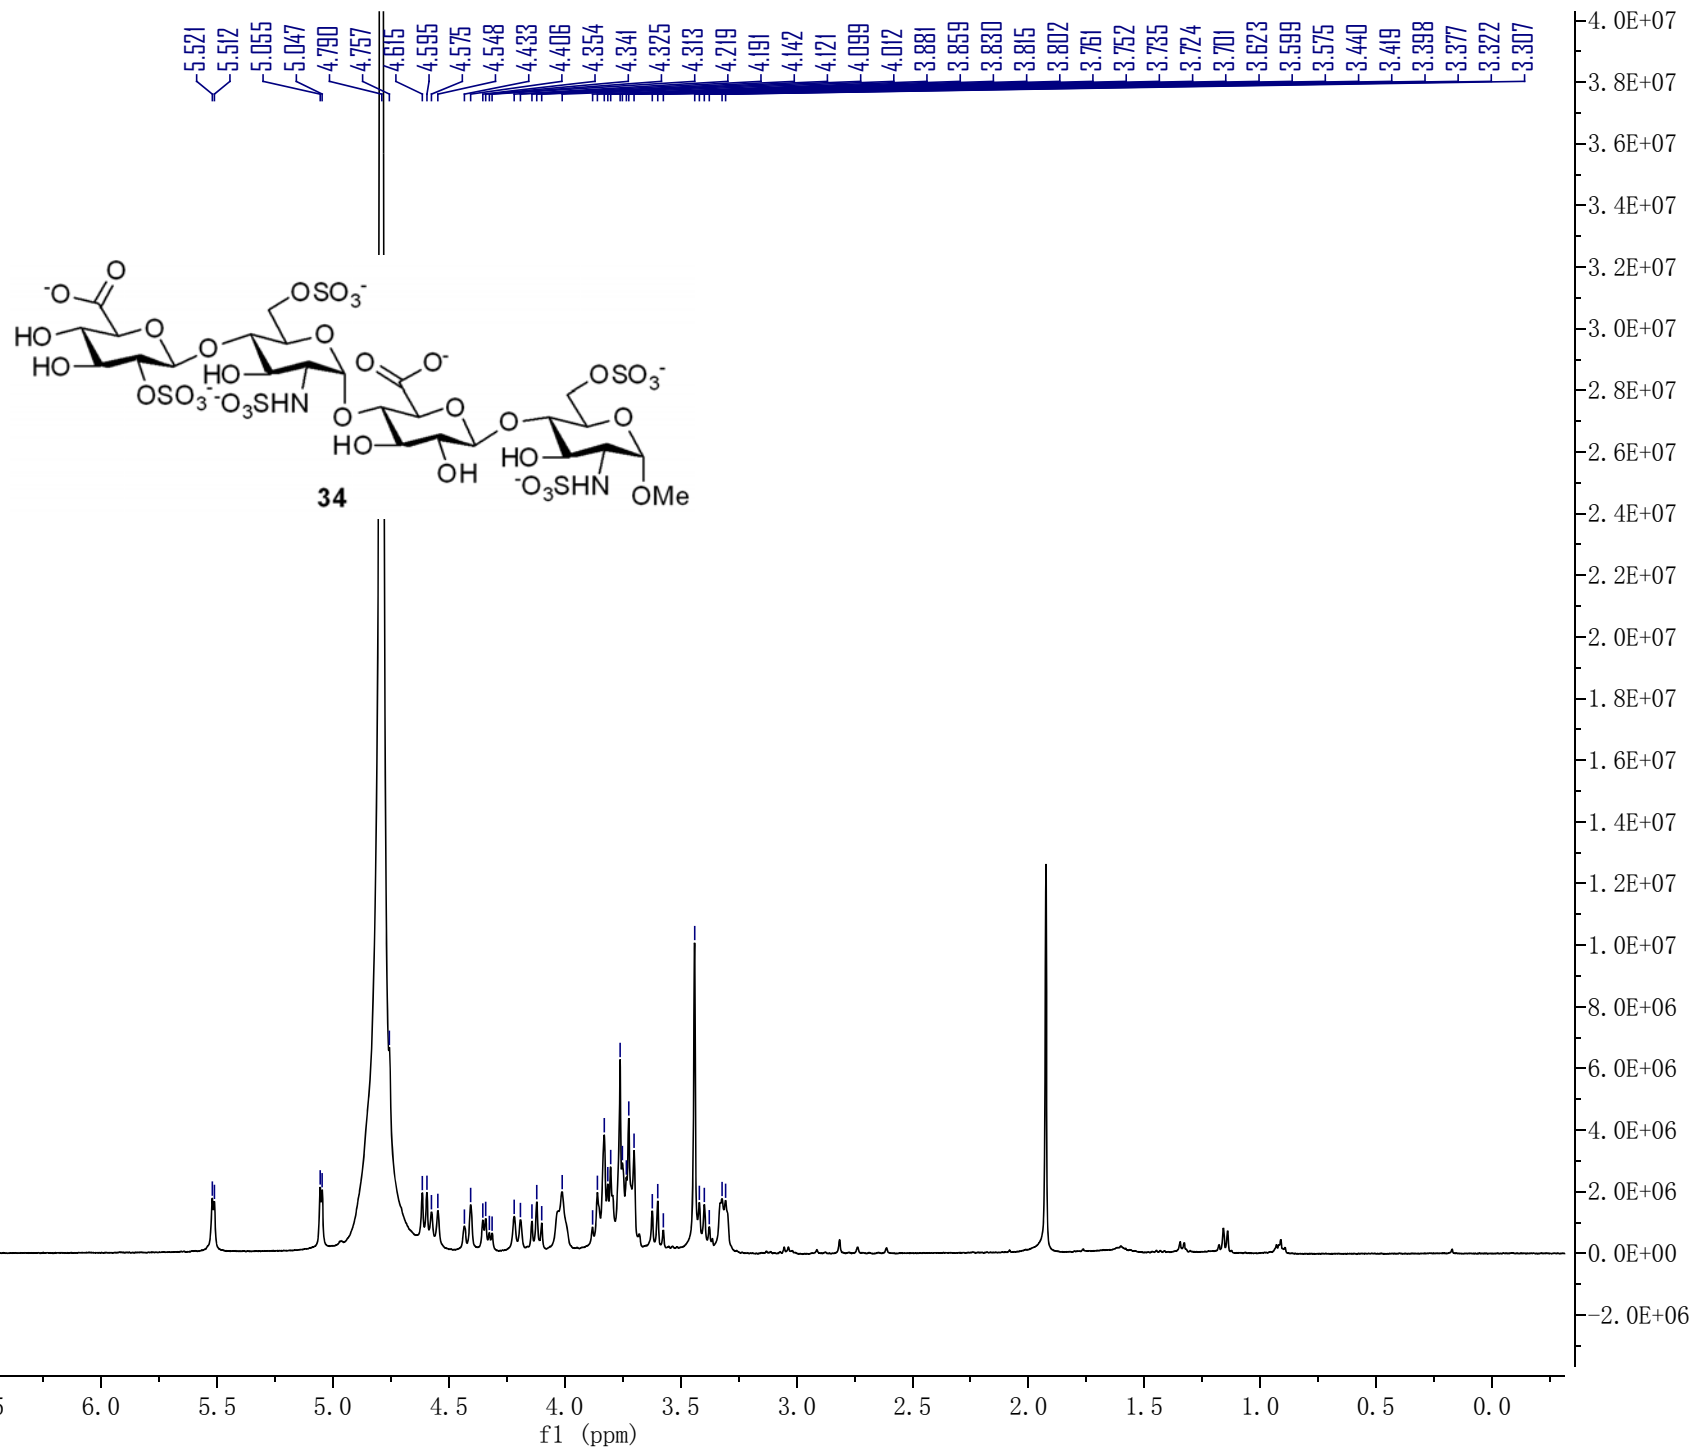

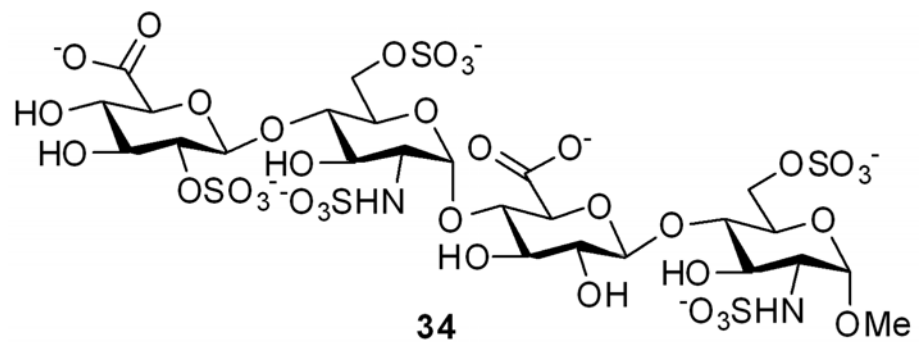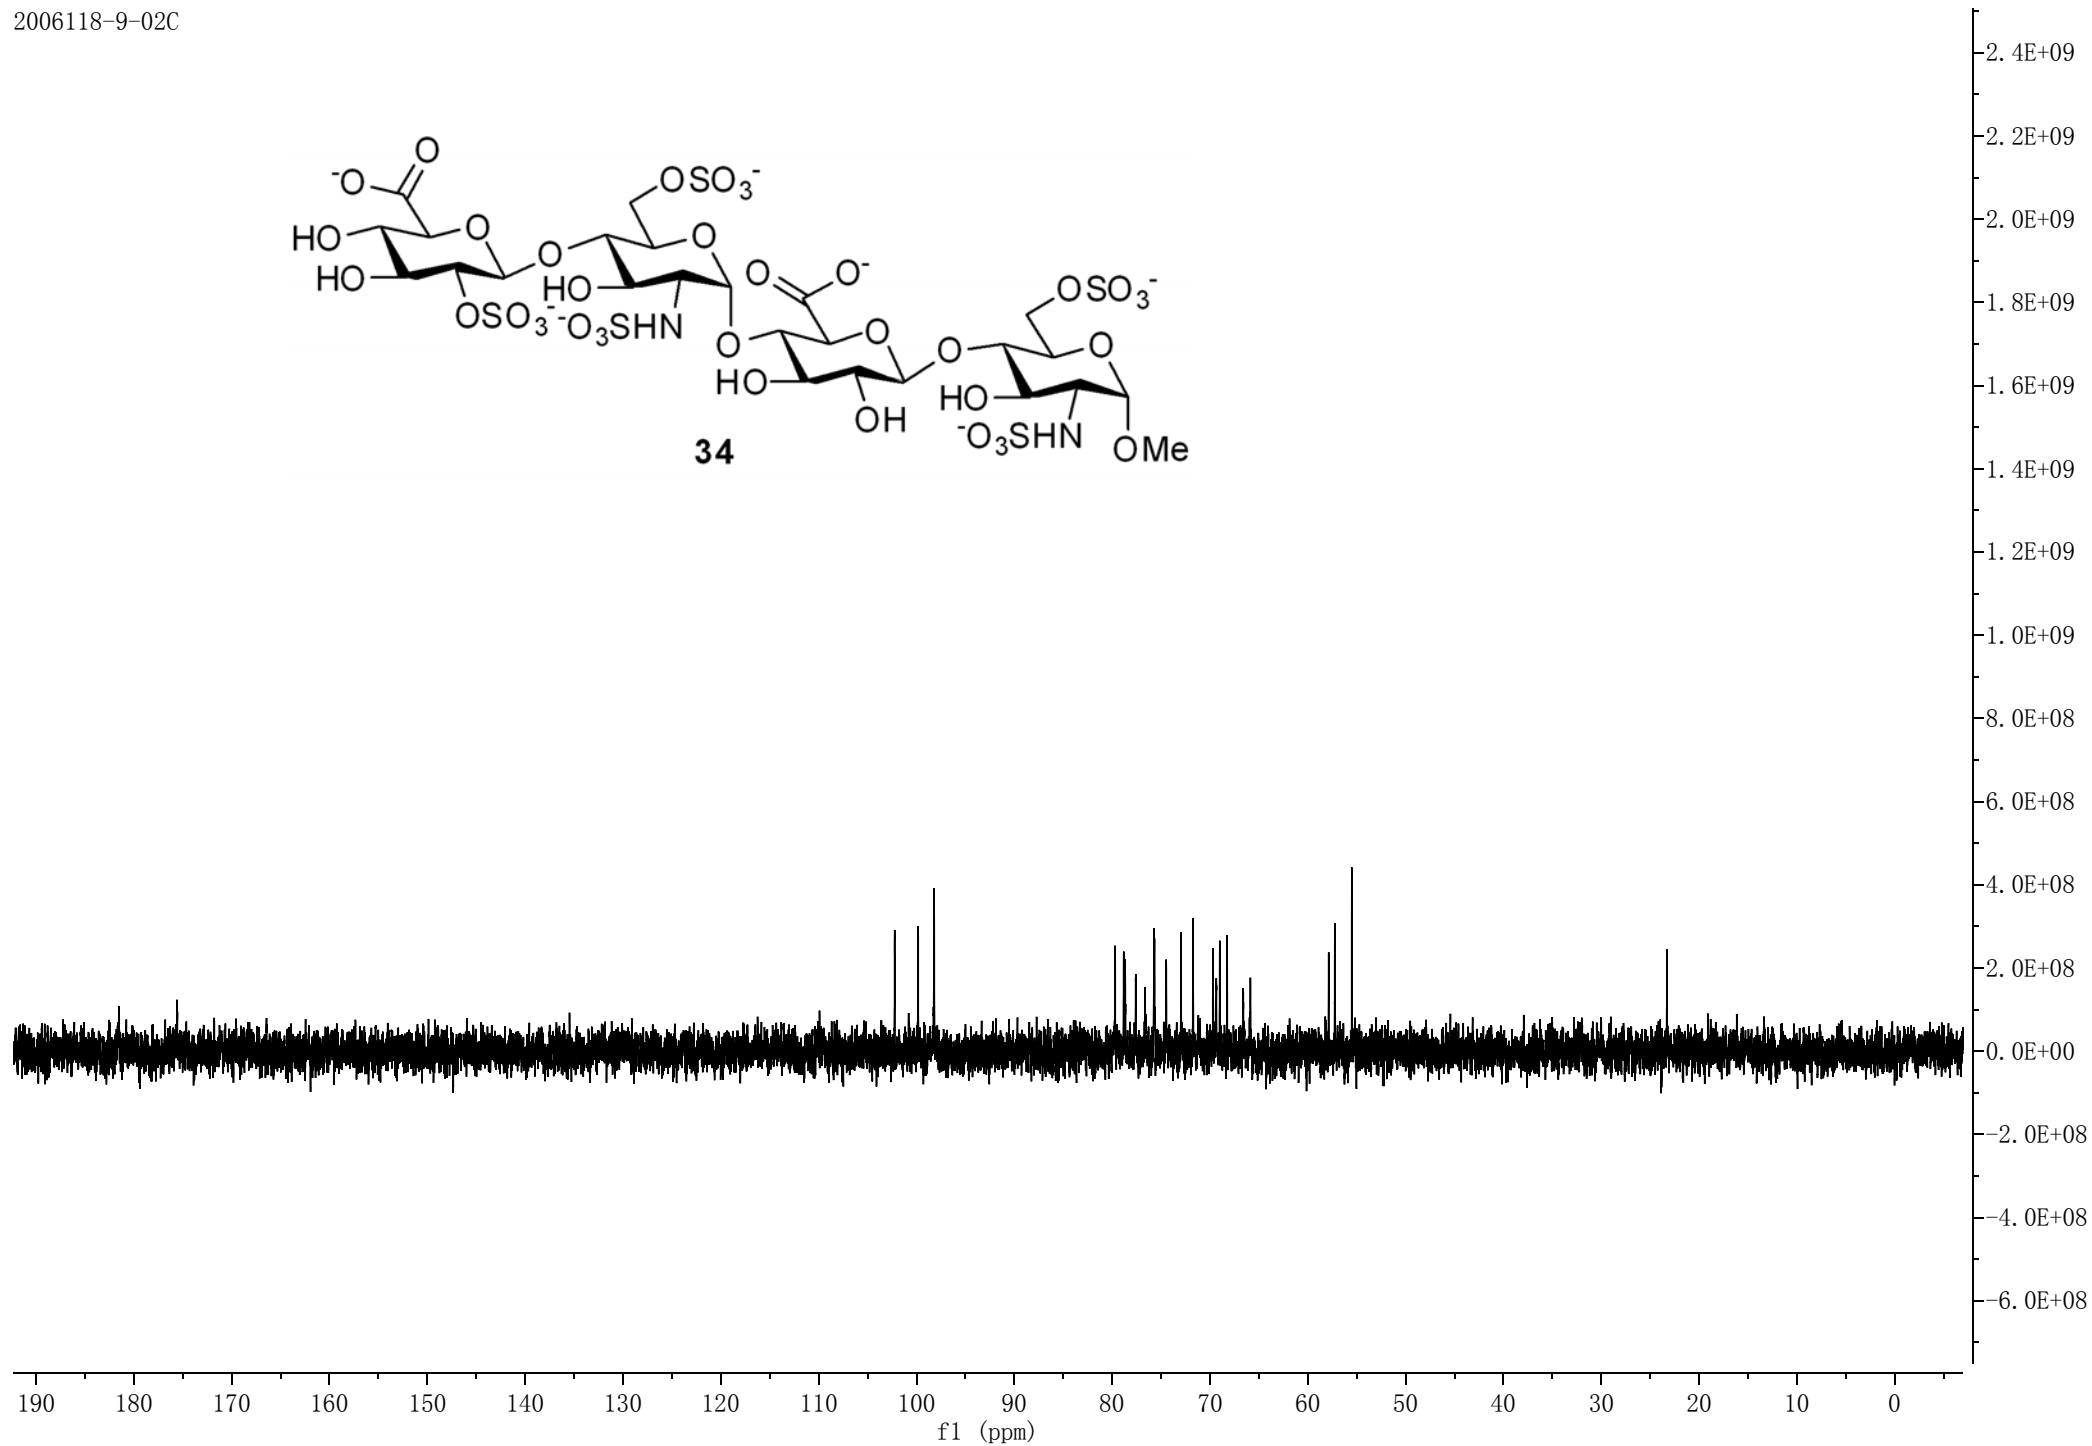

2008112xp15-12\_20130513\_01  
2008132-17-41-bn

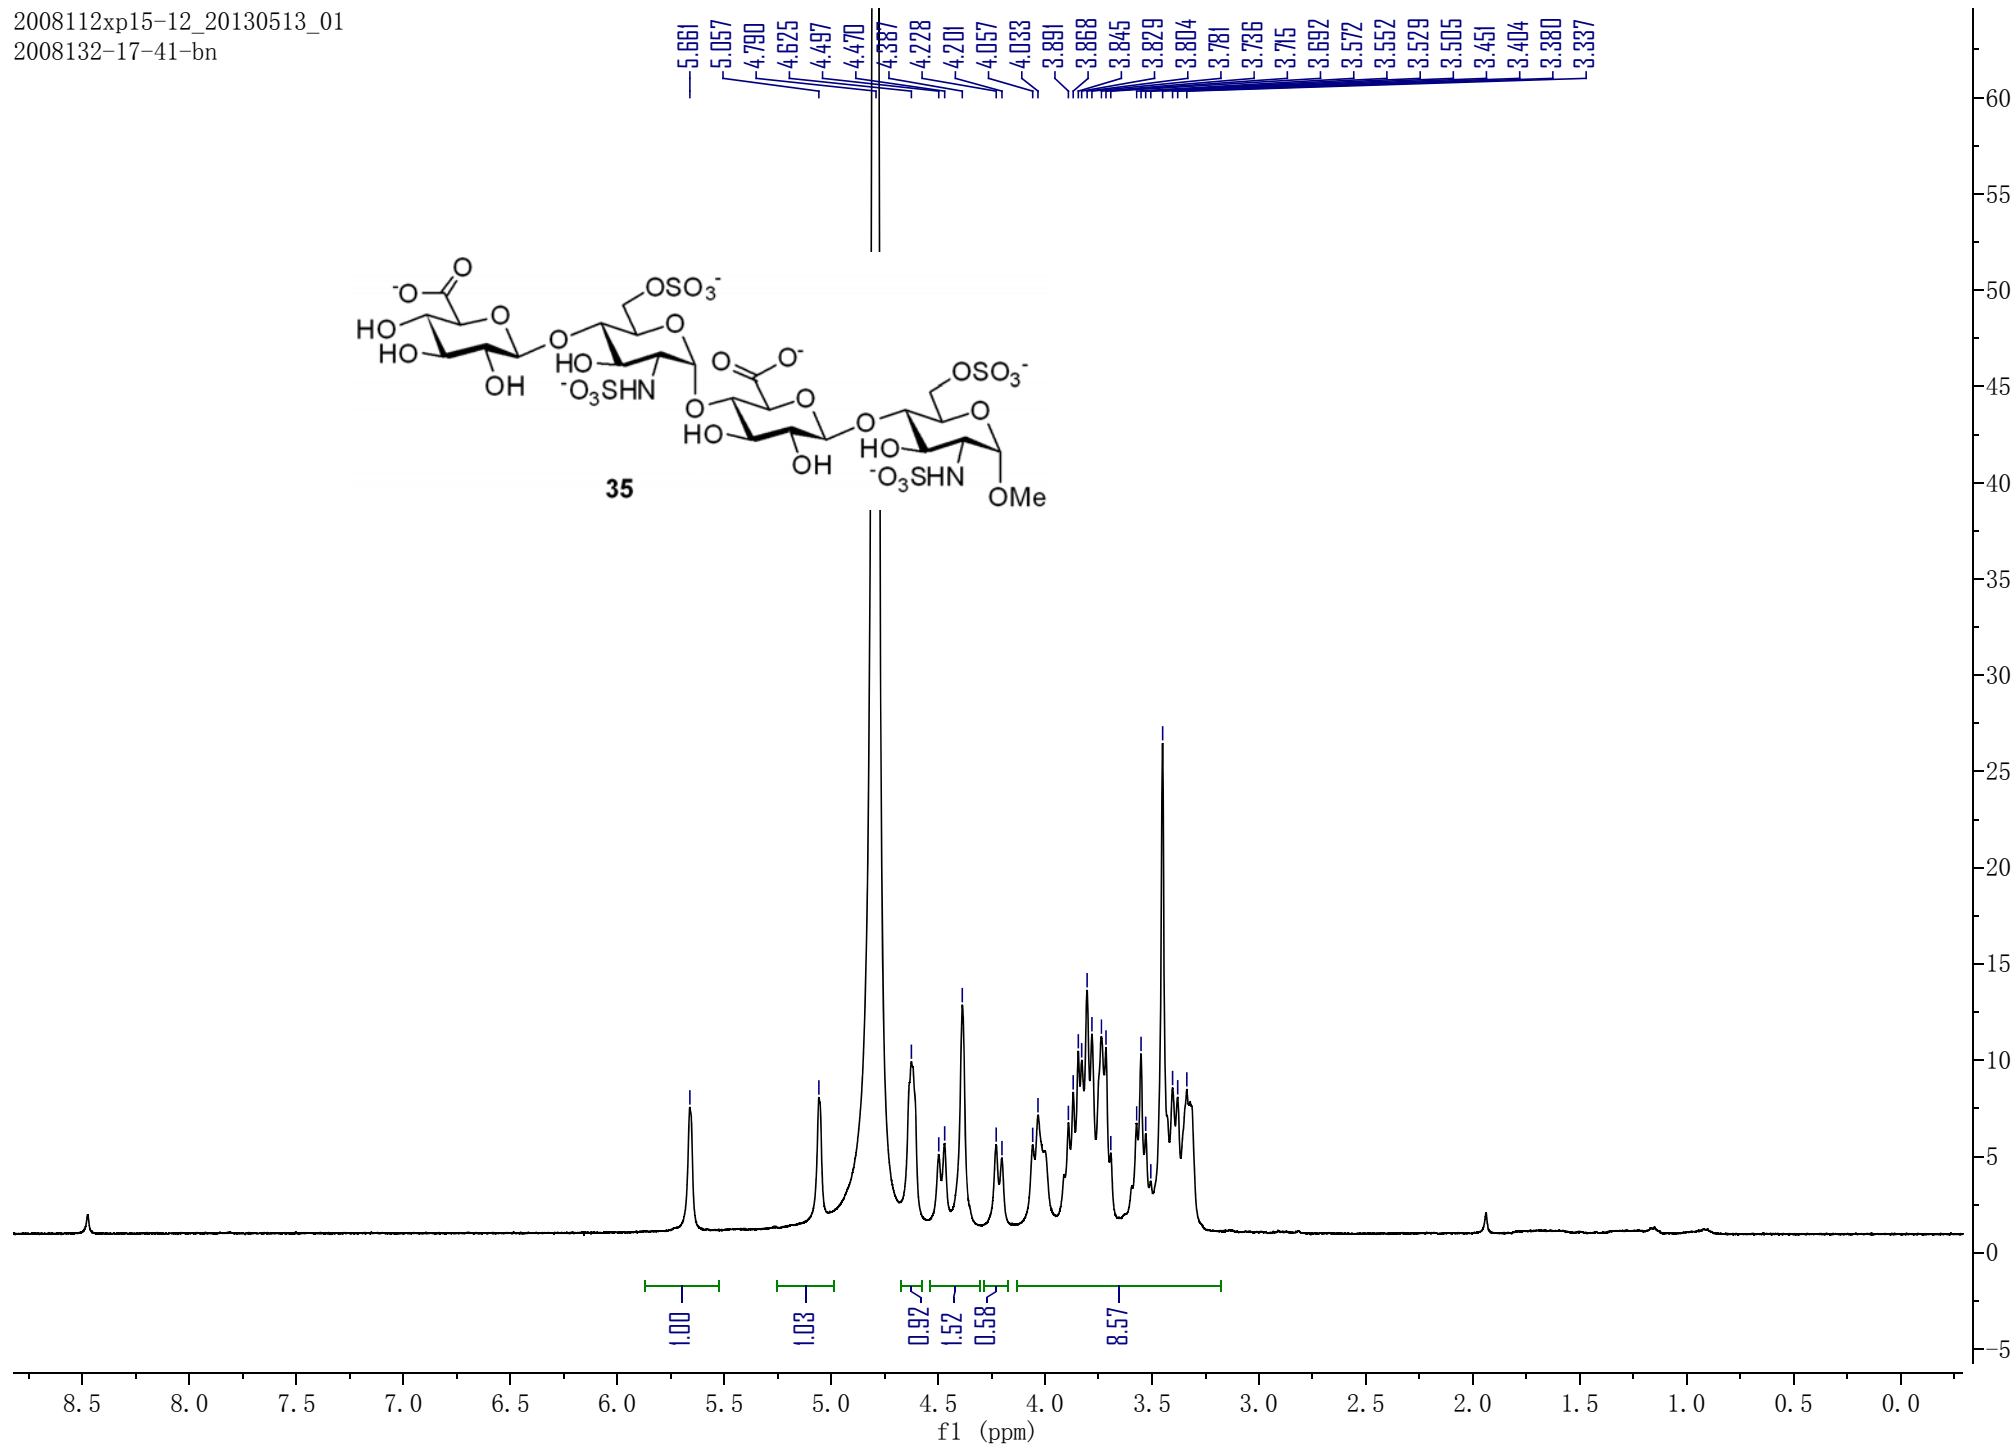

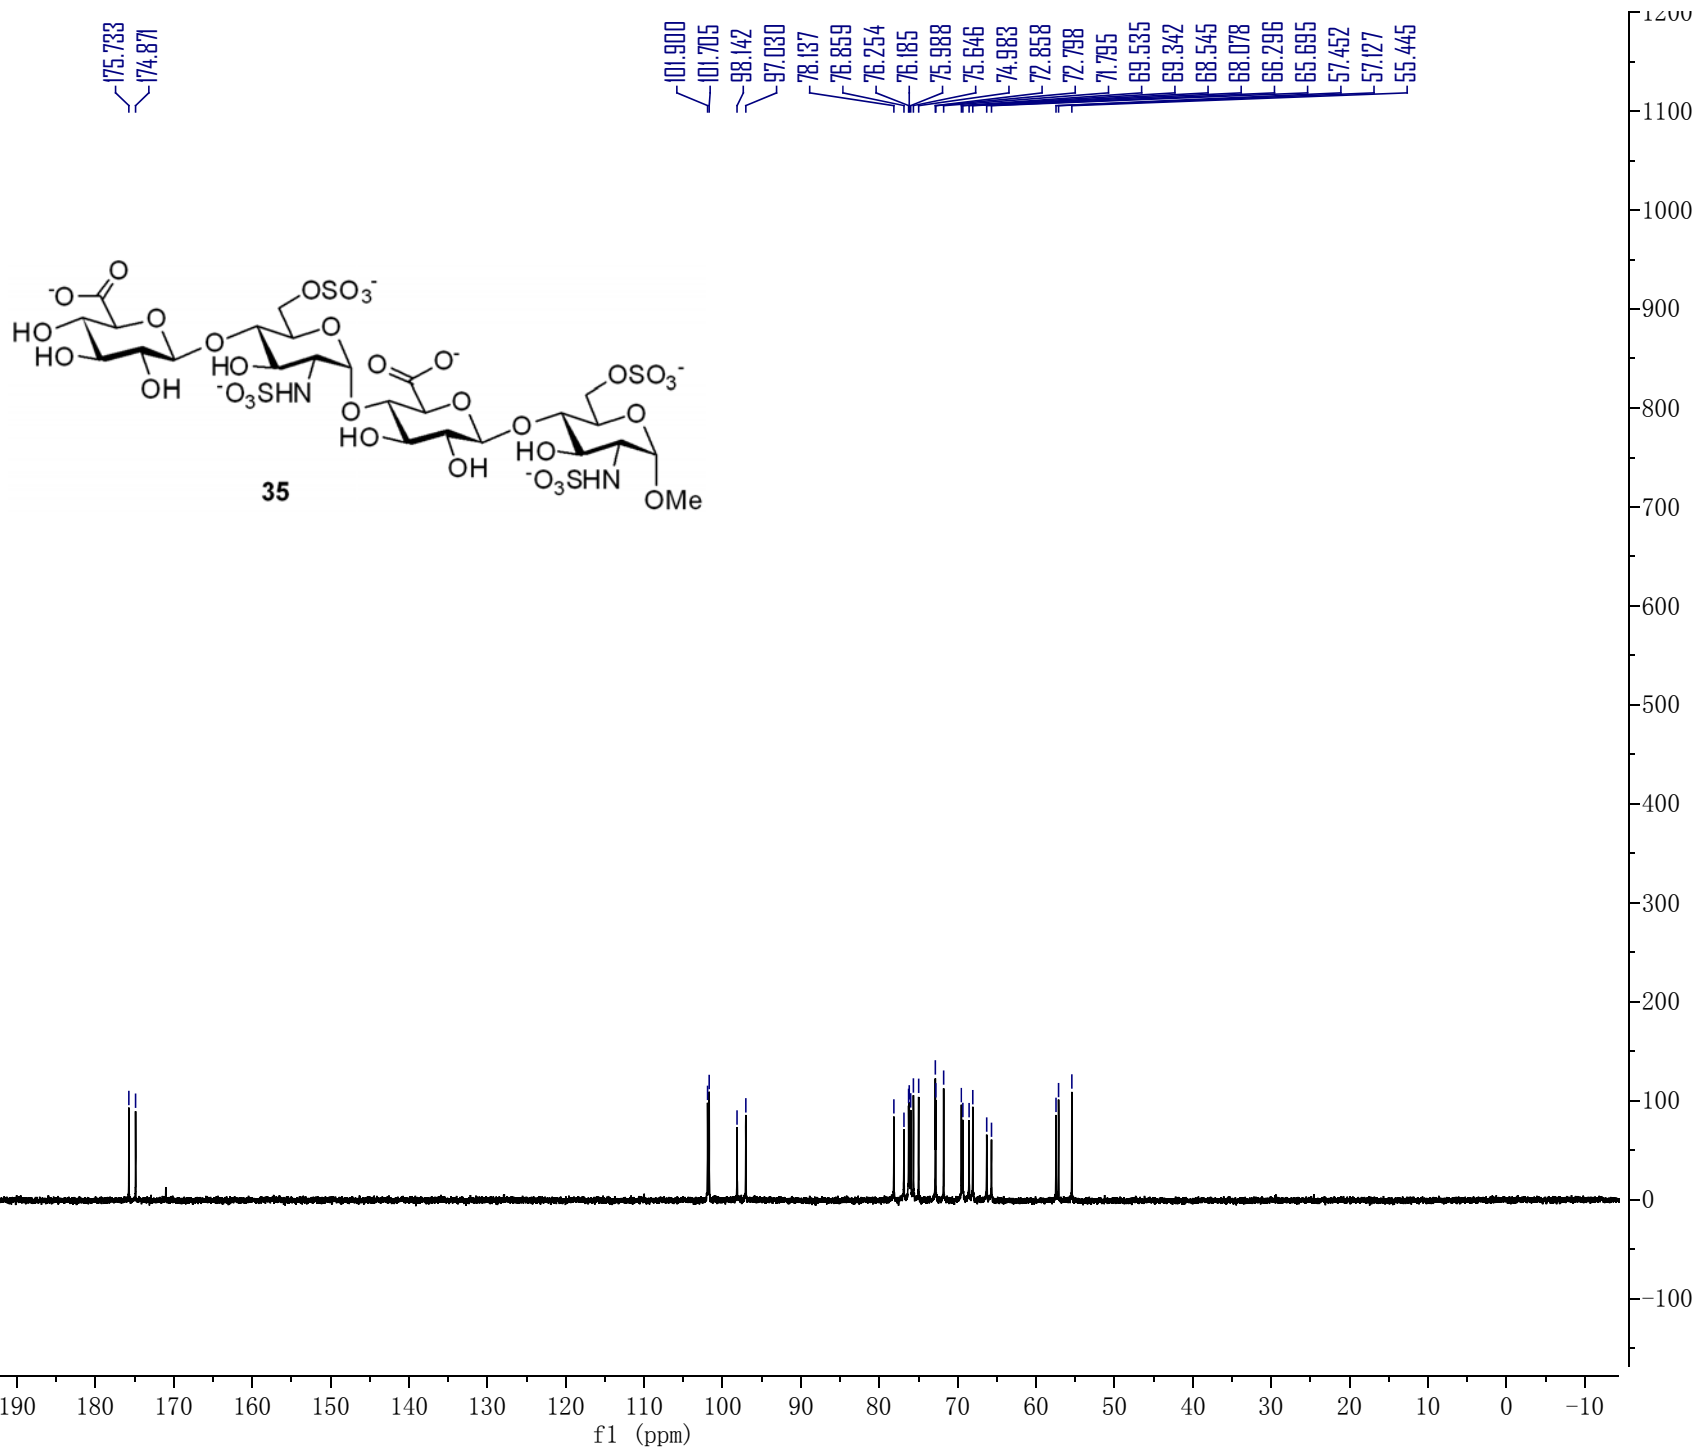

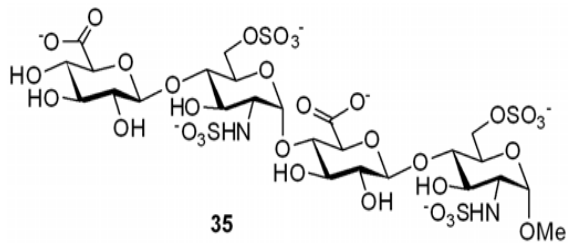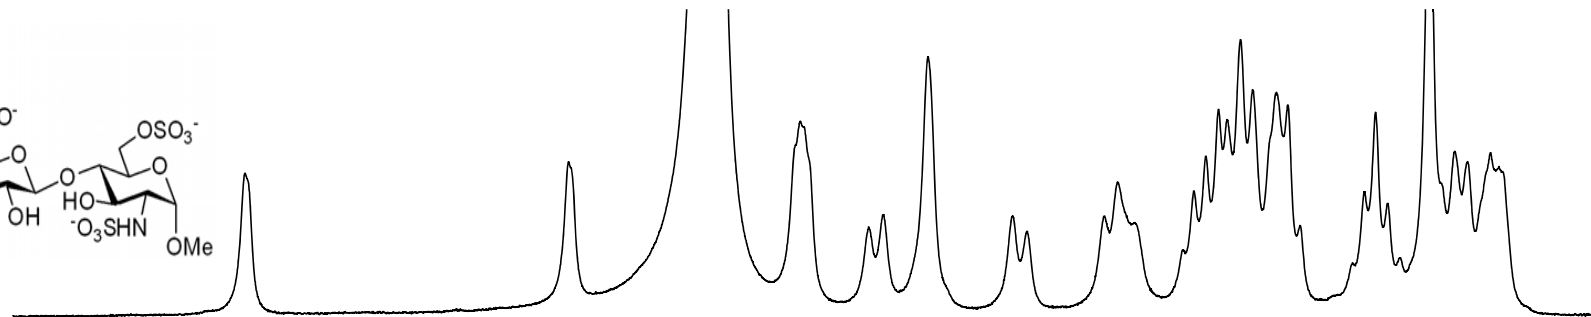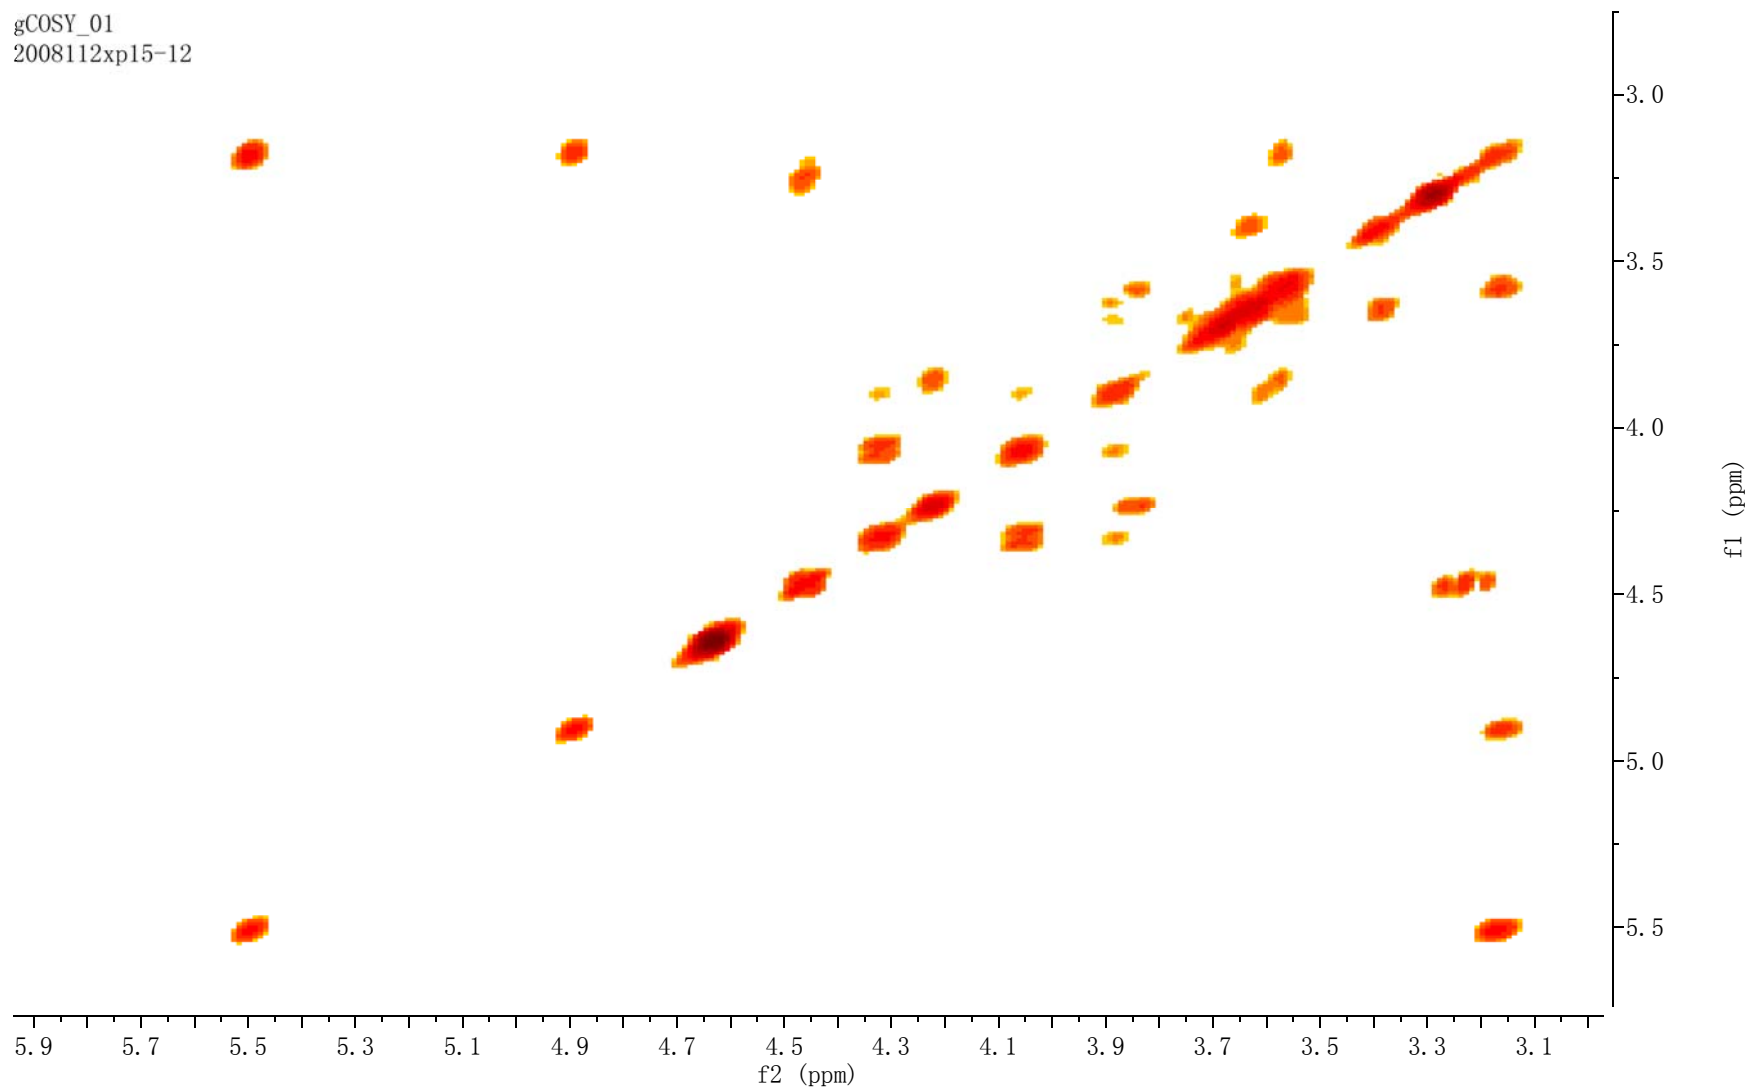

200812xp12-681

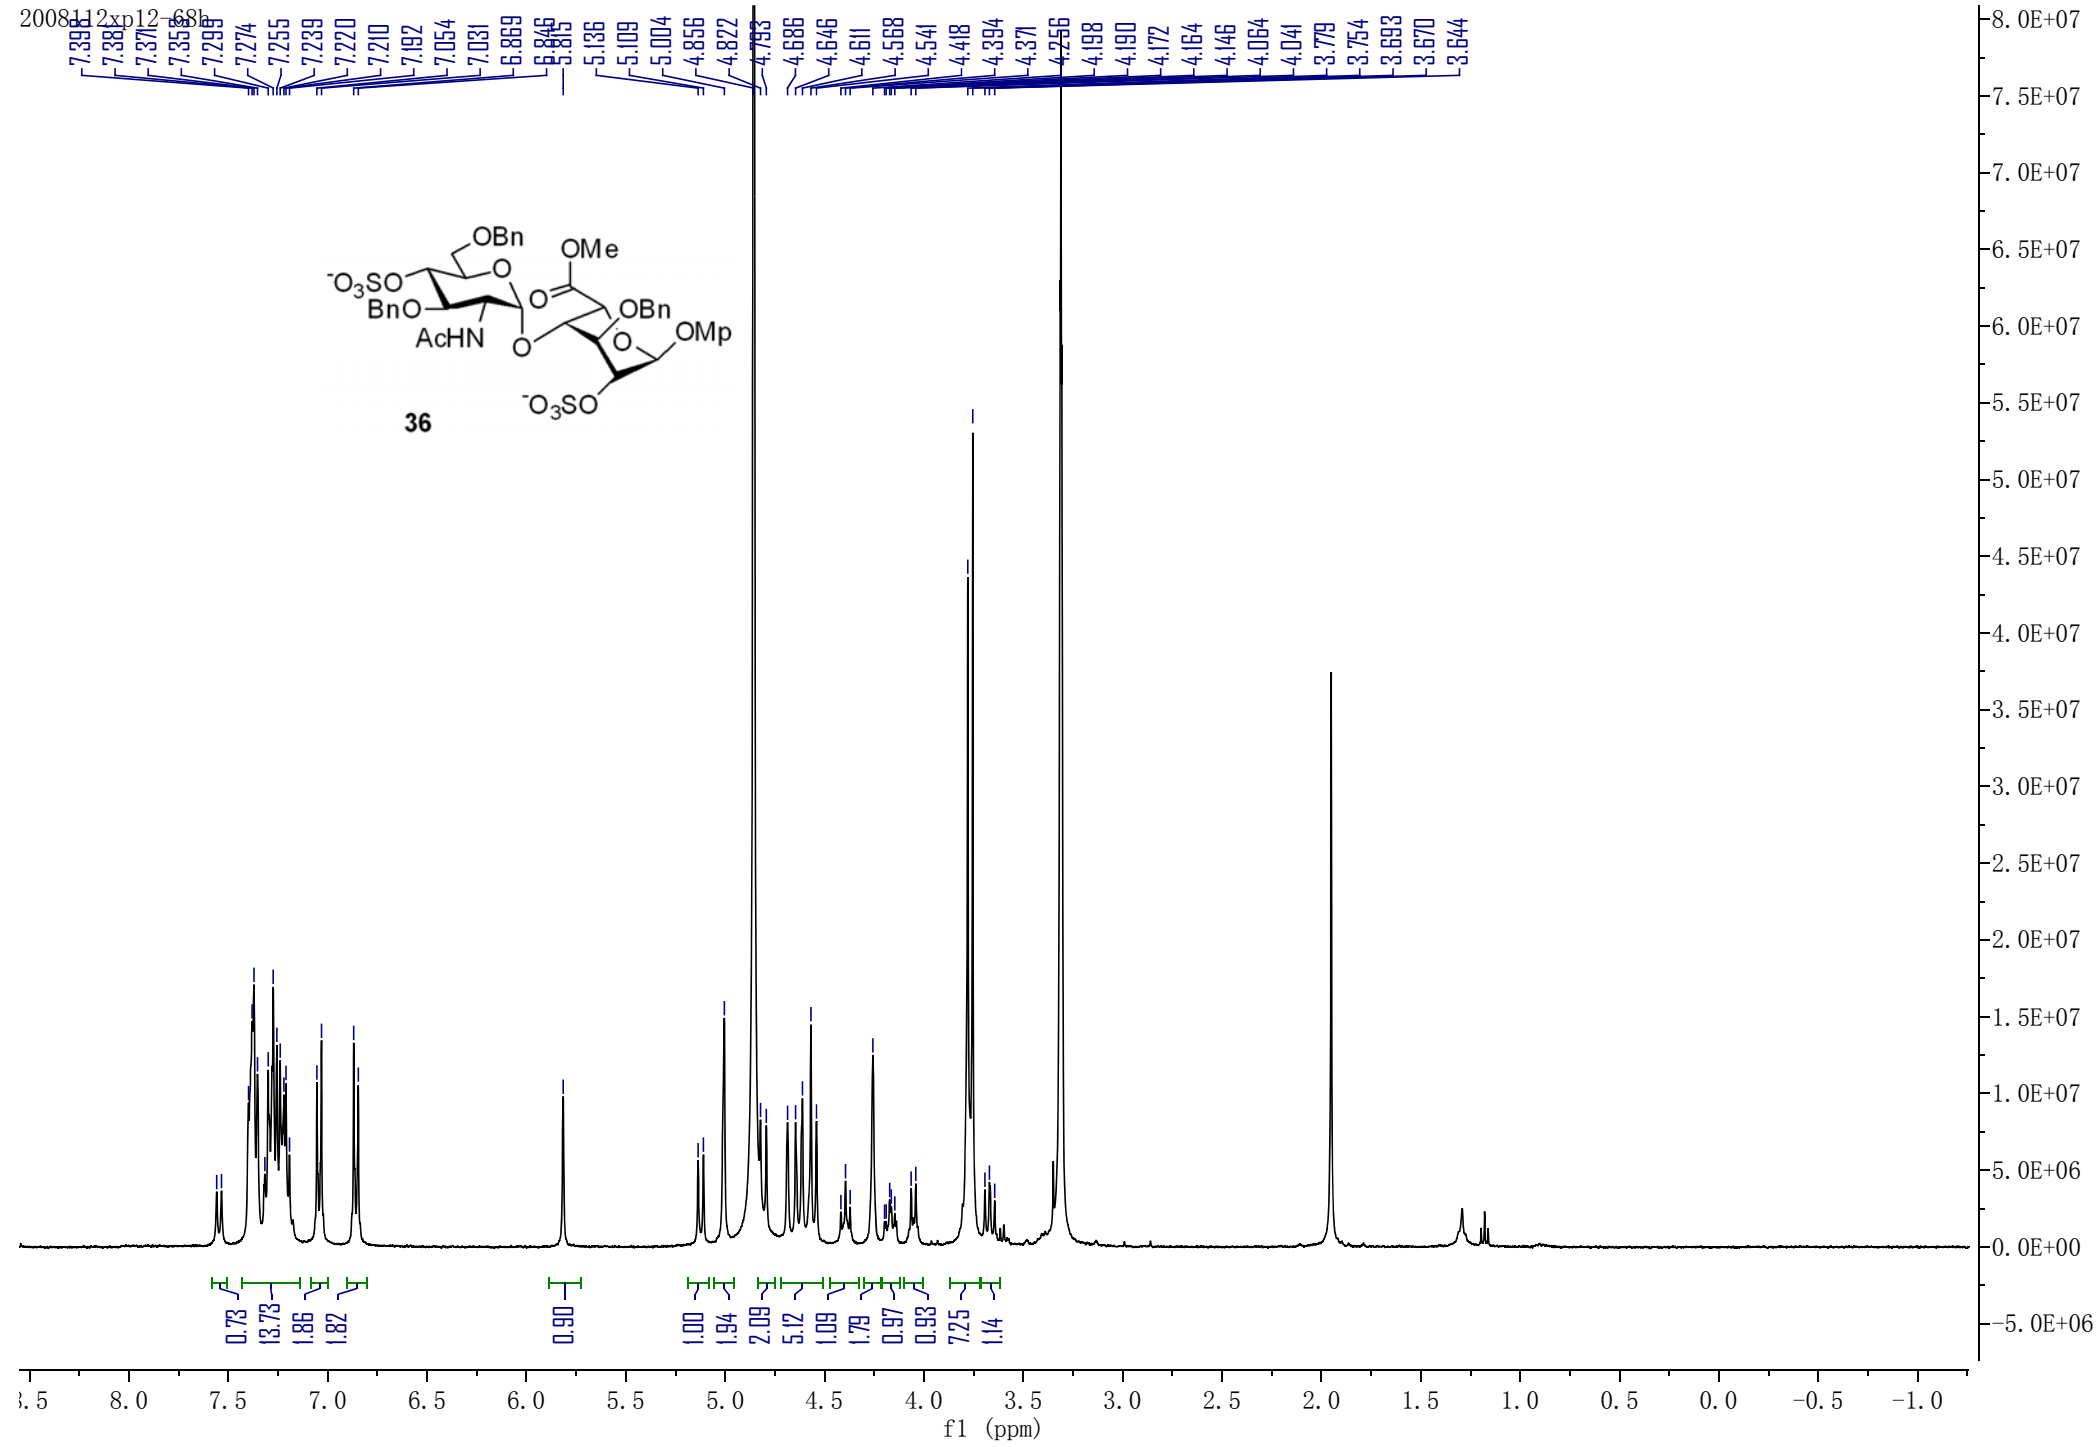

2012年09月

174.026

156.601

152.106

140.498

140.097

139.266

129.331

129.179

129.017

115.639

99.686

96.811

80.401

78.450

76.258

74.438

72.647

72.374

71.882

71.743

70.034

56.076

53.955

23.392

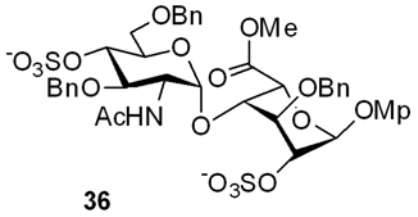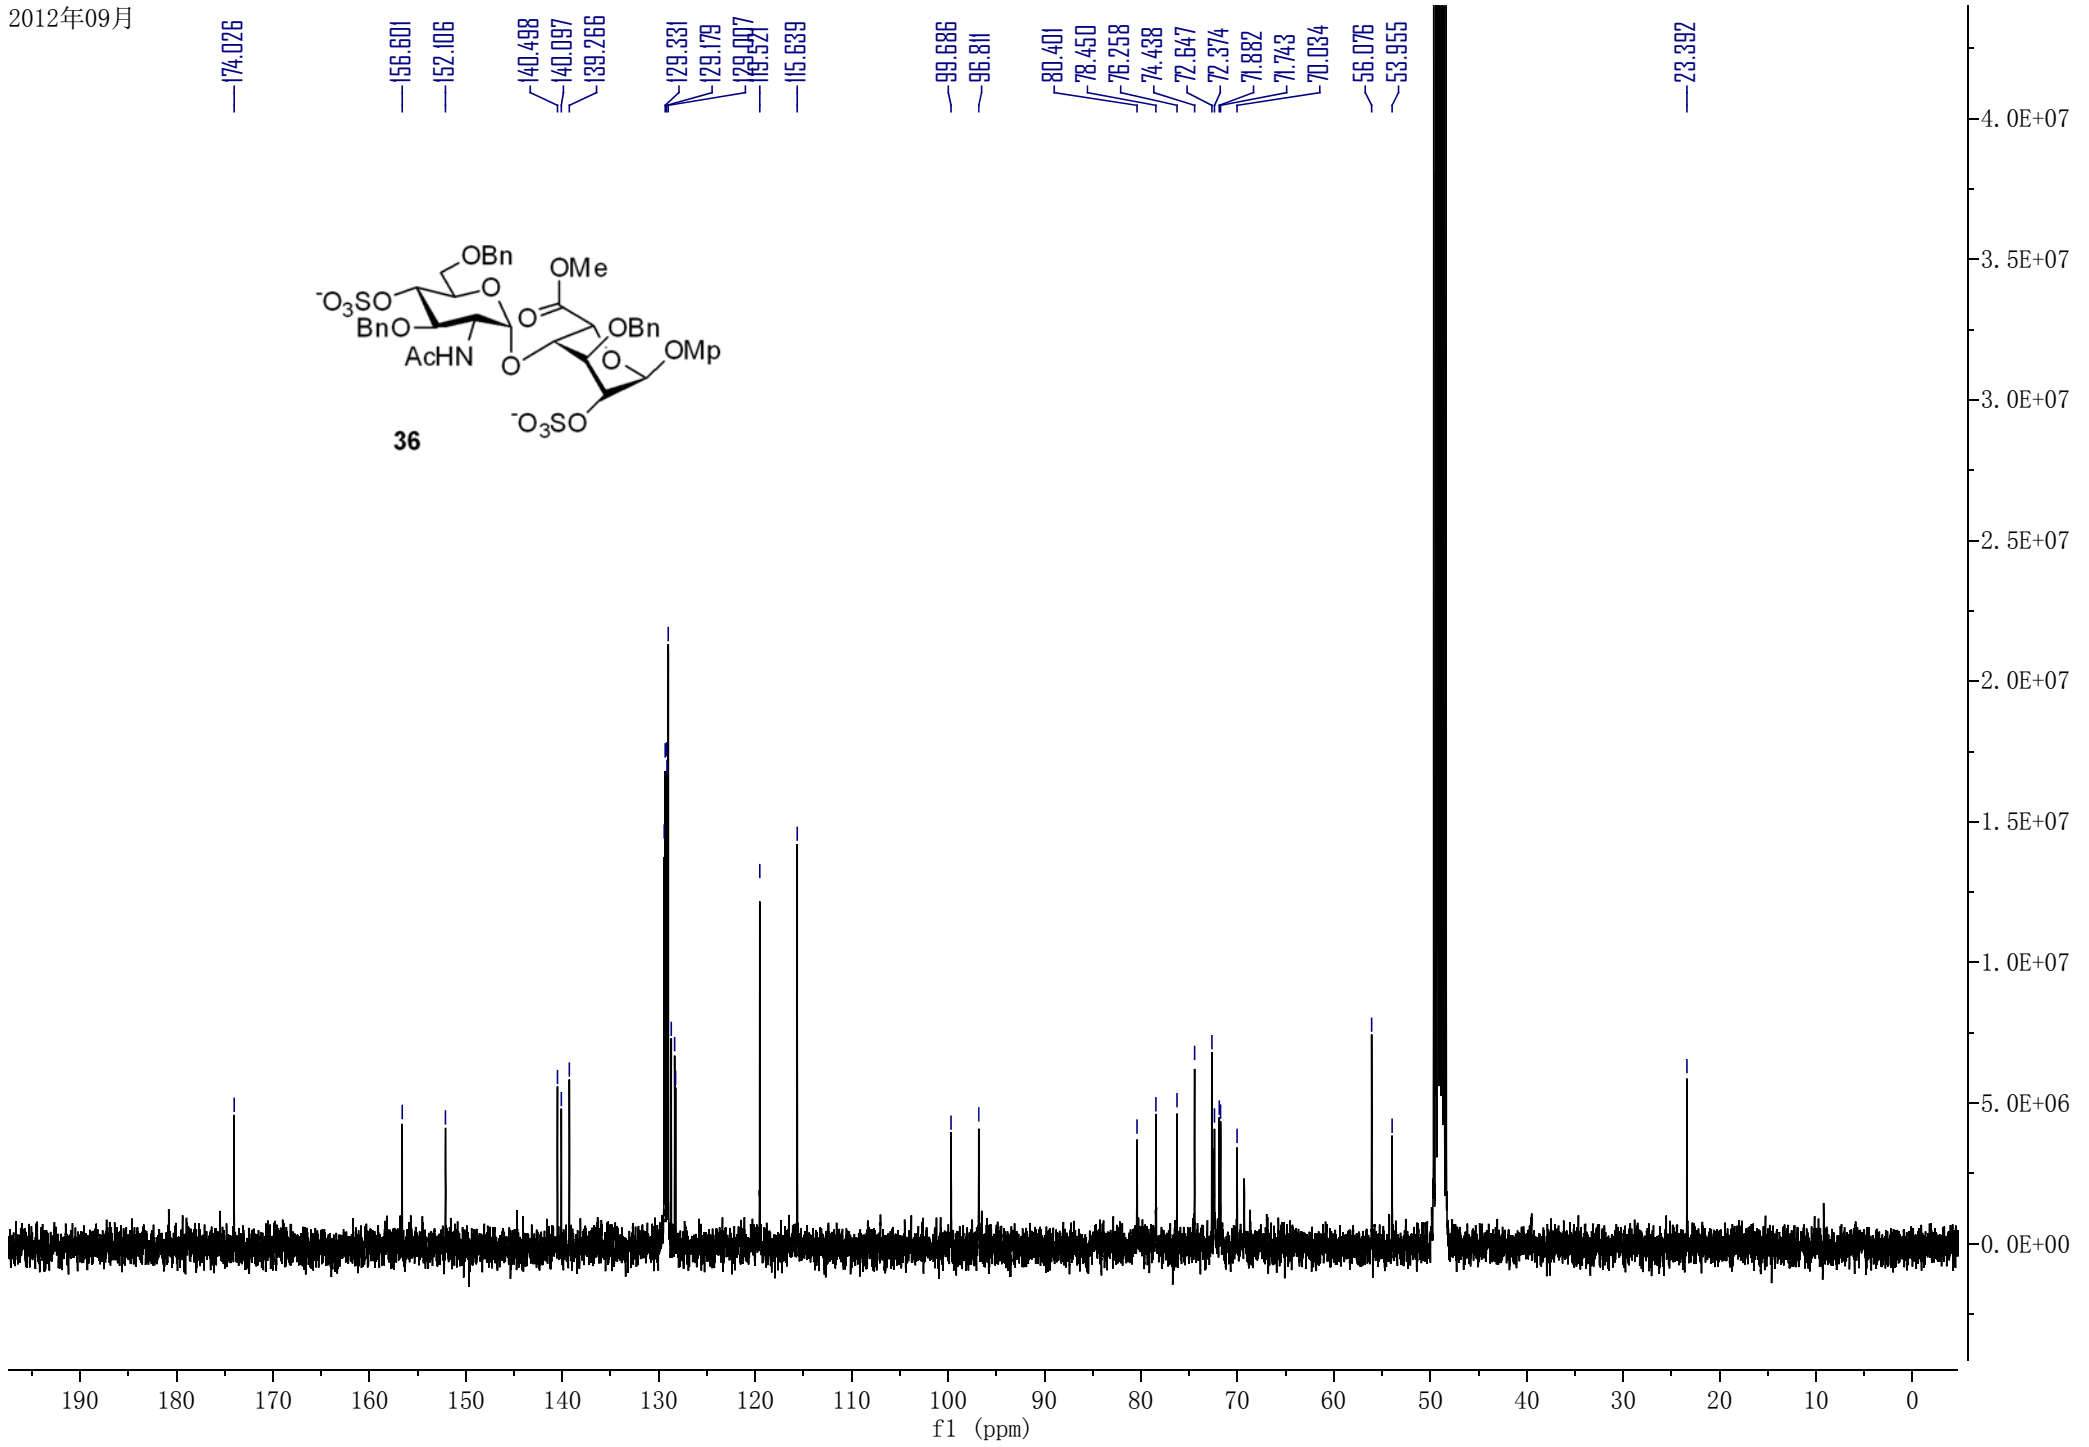

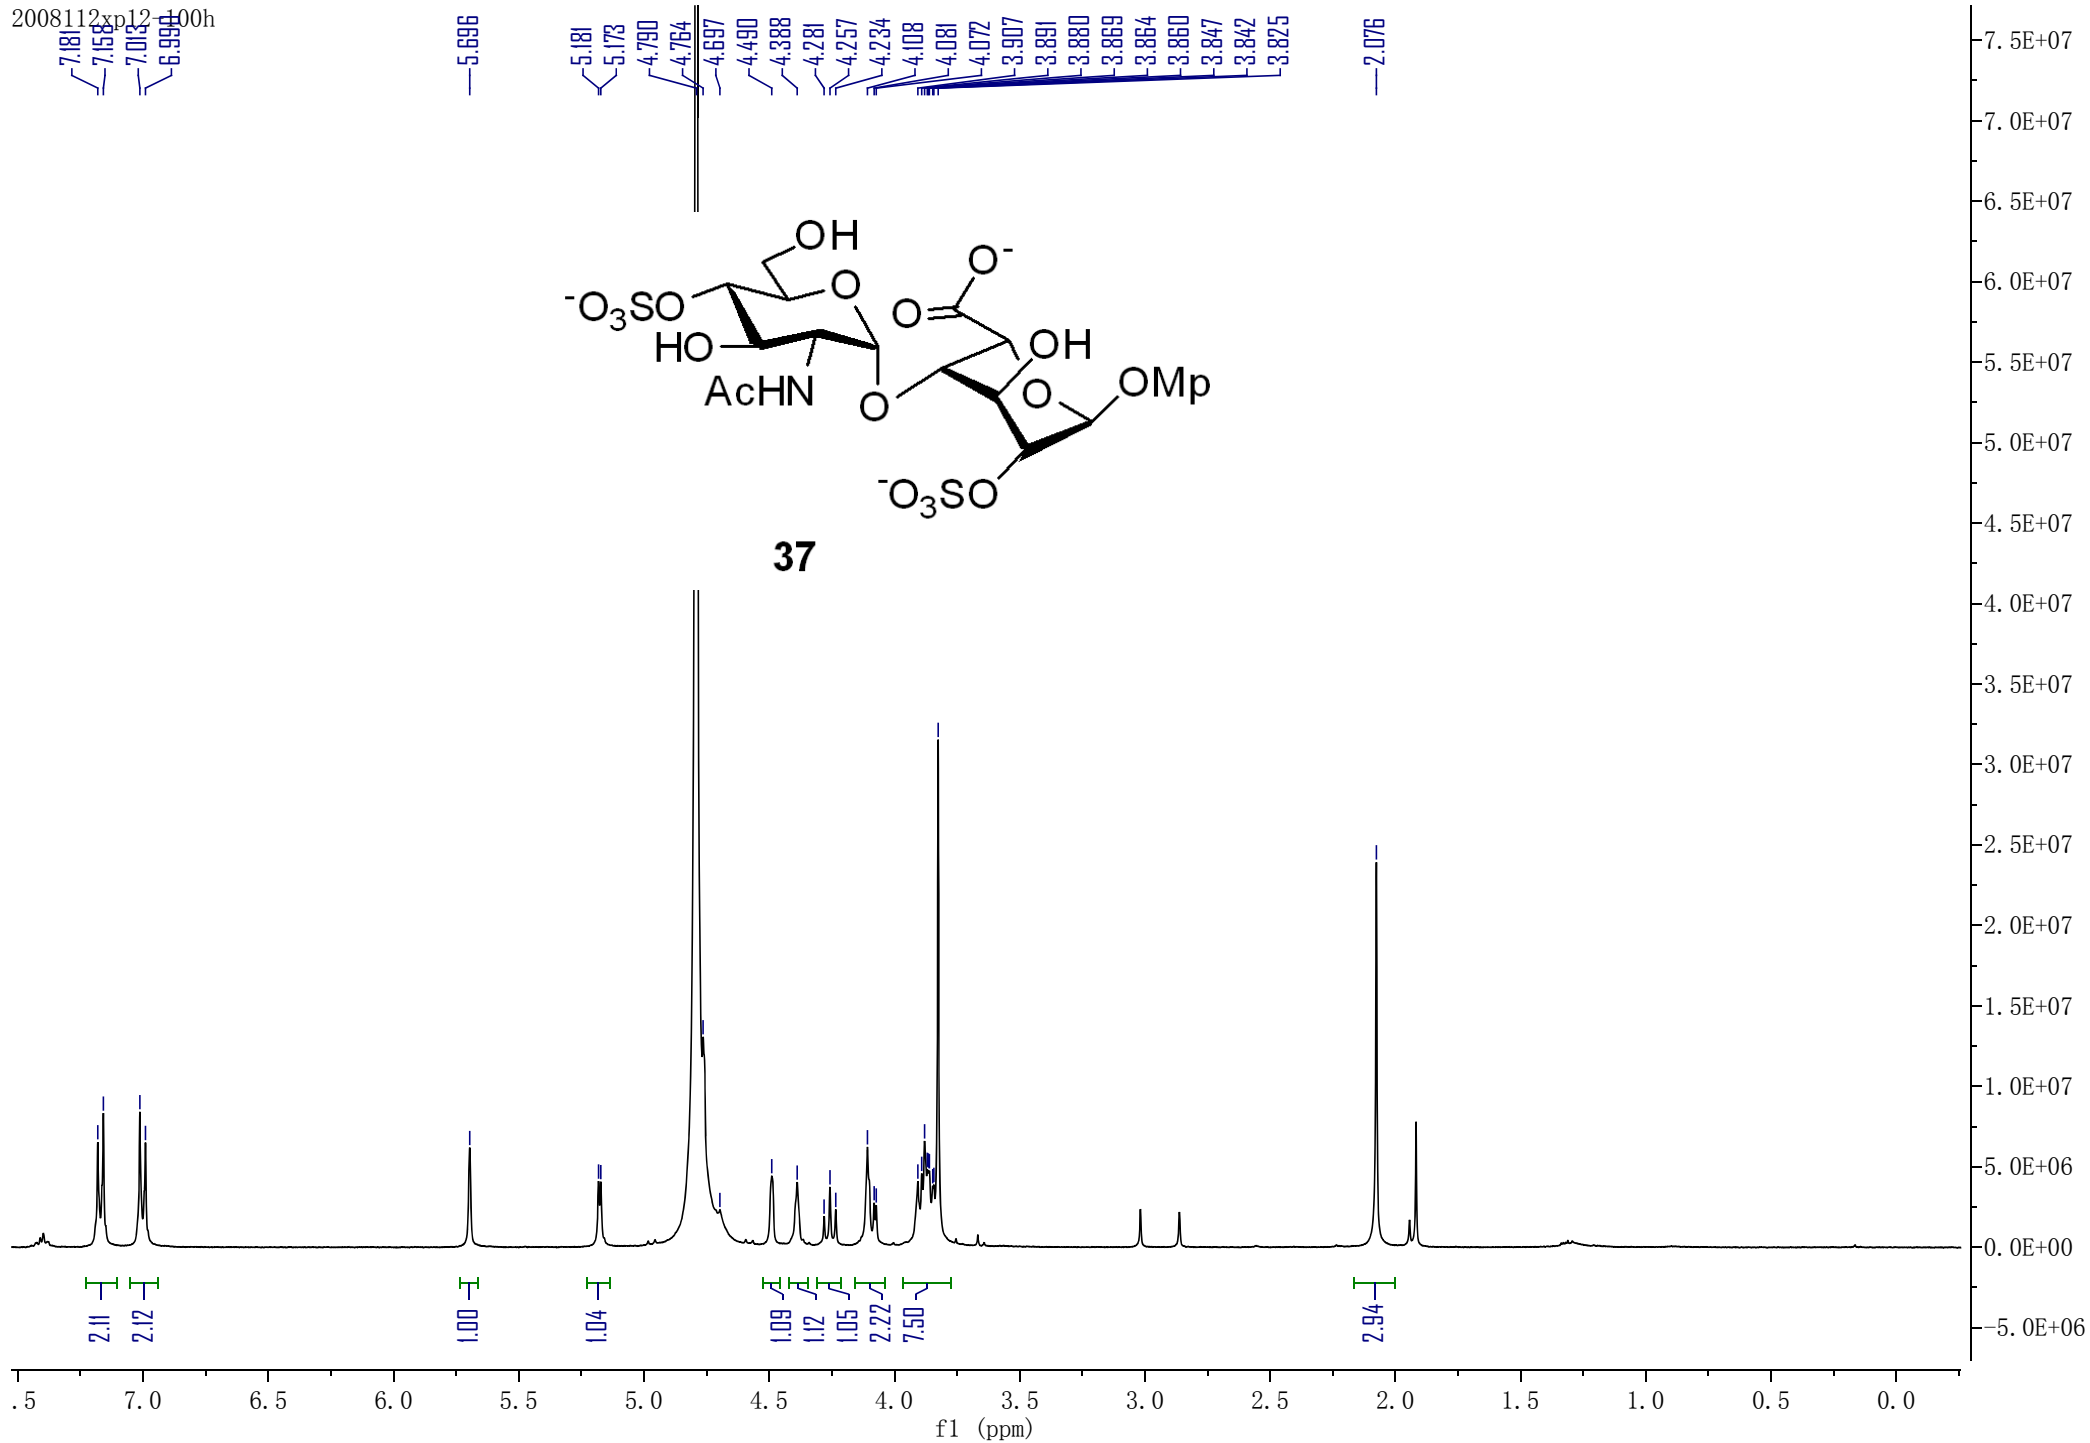



xp12-100c  
Gradient Shimmi

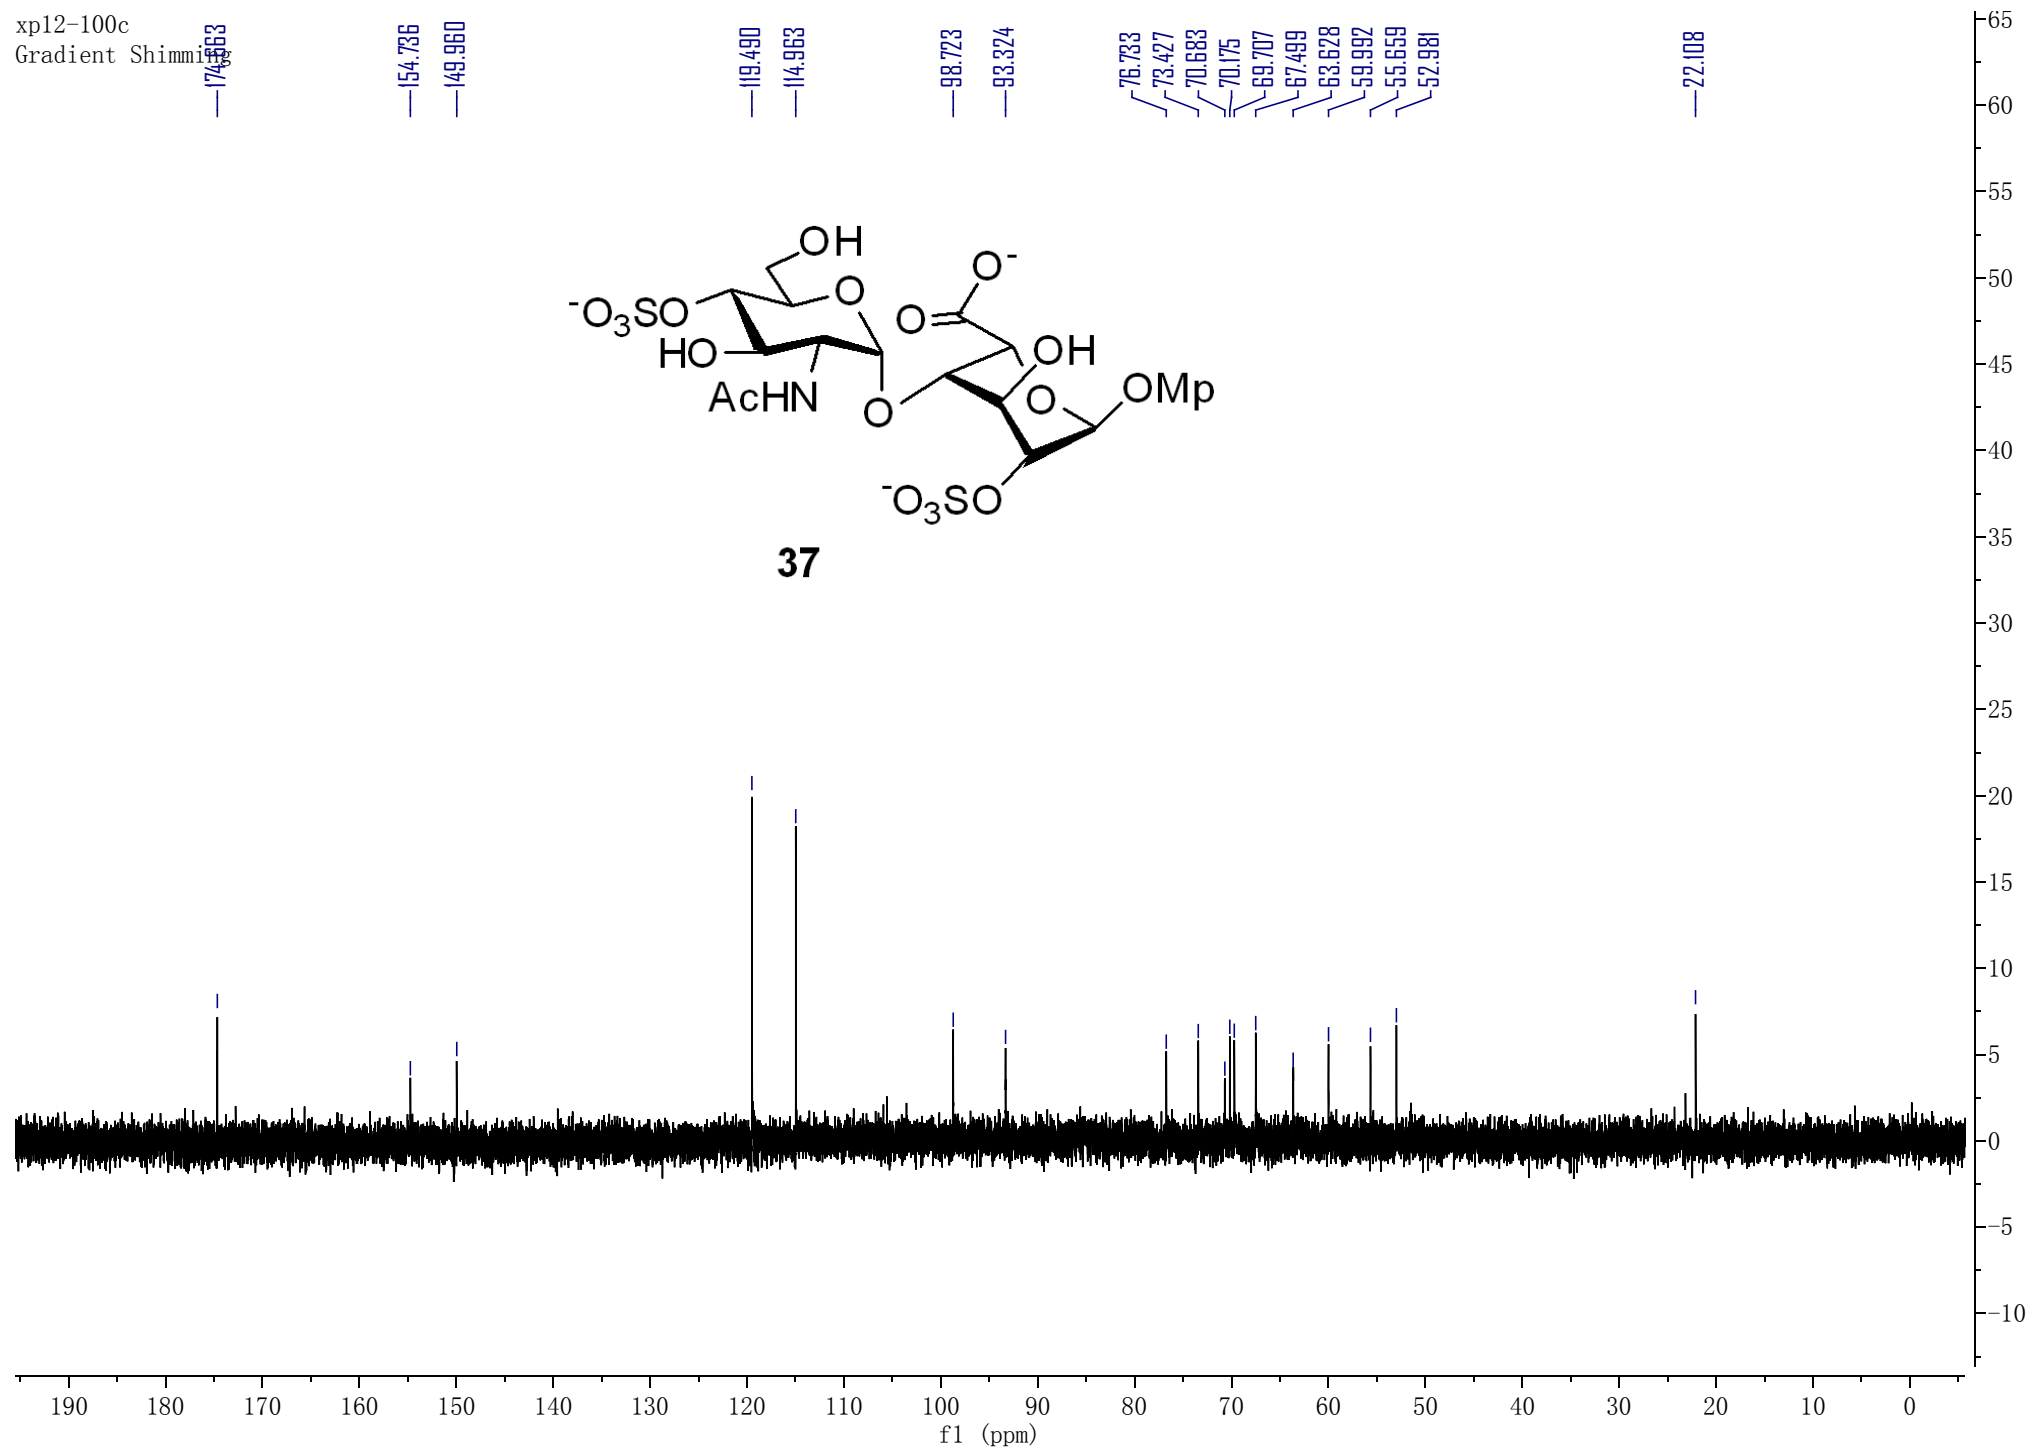

Supplement: c5qo00320b1.pdf [file c5qo00320b1.pdf]
